# Supplementary material for: A multi-scale model for hair follicles reveals heterogeneous domains driving rapid spatiotemporal hair growth patterning
Source: eLife journal article supplement (doi:10.7554/elife.22772), 2017-07-08
Supplement: supp [file Code_description_June06_2017.docx]

**3D model codes**

*Main functions:*

- **Prep_Dynamics3DFollicle.m –** generates the initial state for 3D simulations of a domain with 100x100 HFs. Adjust the RActTot_1 and RInhTot_1 values to obtain either a uniform domain or a field of connected *ventral* and *dorsal* domains.
- **Prep_Dynamics3DFollicle_BackOnly.m** – generates the initial state for 3D simulations of a domain with 60x100 HFs.
- **Dynamics3DFollicle_eLife.m** – simulations of ventral-dorsal HF interactions on a 100x100 HF domain. See Figure 2F and Appendix 2-Figures 7, 28-30.
- **Dynamics3DFollicle_BackOnly_eLife.m** – simulations of dorsal HFs on a uniform 60x100 domain. See Appendix 2-Figures 12, 13B and 15.
- **DynamicsEarHF_eLife.m** – simulations of the hyper-refractory ear domain on a uniform 100x100 domain. See Appendix 2-Figure 16.
- **Dynamics3DFollicle_Cut_Connect_eLife.m** – simulations on a 100x100 domain with a “cut-off” region, where molecules are allowed to diffuse but no HF growth is permitted. See Appendix 2-Figure 18.
- **Dynamics3DFollicle_Cut_NoConnect_eLife.m** –simulations on a 100x100 domain with a “cut-off” region, where no molecules are allowed to diffuse and there is no HF growth. See Figure 7A.
- **Dynamics3DFollicle_Hole_NoConnect_eLife.m** – simulations on a 100x100 domain with two cut-off regions and a gap in between. No HF growth occurs in the cut-off regions and no molecules are allowed to diffuse into these regions. See Figure 7B.
- **DynamicsEarHF_WaveBreaker.m –** simulations on a 100x100 domain, with a small region having high inhibitor level designed to simulate hyper-refractory ear skin. See Appendix 2-Figure 17.

*Sub-functions*: **De3DFollicleLength.m**

**Single HF model codes**

*Main function*:

- **DynamicsSingleFollicle.m –** simulations of single HF dynamics. See Figure 1B, 1C and Appendix 2-Figures 5, 6, 8, 9, 10, 19-26.

*Sub-functions*: **ConcDiff.m, DeFollicleLength.m, DeSingleFollicle.m.**

**FHN model codes**

HF wave dynamics were simulated using the FitzHugh-Nagumo model. Codes are originally from Murray *et. al.* (2012), with modifications as illustrated in Appendix 2-Section 9. Also see Appendix 2-Figures 31-36.
