# Supplementary material for: A multi-scale model for hair follicles reveals heterogeneous domains driving rapid spatiotemporal hair growth patterning
Source: eLife. 2017 Jul 11;6:e22772. doi: 10.7554/eLife.22772 (PMC5610035; doi:10.7554/eLife.22772)
Supplement: Supplementary file 1. — DOI: http://dx.doi.org/10.7554/eLife.22772.010 [file elife-22772-supp1.xlsx]

## Sheet: Activator, group 1
Group	Gene	Anagen 1	Anagen 2	Anagen 3	Anagen 4	Anagen 5	Catagen 1	Catagen 2	Catagen 3	Telogen
Activator group 1	Apitd1	0.339867	0.377945	0.286685	0.0153511	-0.0675939	-0.153443	-0.168836	-0.48212	-0.33599
Activator group 1	Aurka	0.500631	0.598037	0.487786	0.119652	0.0734598	-0.0808261	-0.145558	-0.913998	-0.781261
Activator group 1	Aurkb	0.521234	0.566511	0.509187	0.12451	0.0861775	-0.0626332	-0.0838934	-0.915968	-0.918679
Activator group 1	Birc5	0.601711	0.649161	0.600583	0.12281	0.0764326	-0.0434	-0.162014	-0.971066	-0.958739
Activator group 1	Brca1	0.453567	0.560212	0.493846	0.109638	0.0539194	-0.0940445	-0.143792	-0.982952	-0.788095
Activator group 1	Bub1	0.324671	0.335772	0.303413	0.035251	-0.0200513	-0.11245	-0.148285	-0.478619	-0.411528
Activator group 1	Bub1b	0.54224	0.629624	0.525014	0.165546	0.0488145	-0.0363401	-0.134499	-0.914448	-0.890514
Activator group 1	Bub3	0.138351	0.226576	0.303382	0.111578	0.137272	0.00882608	-0.131012	-0.391117	-0.336121
Activator group 1	Ccdc99	0.393549	0.405873	0.259262	0.021556	-0.0391925	-0.102995	-0.198988	-0.469825	-0.406904
Activator group 1	Ccna2	0.552353	0.655463	0.52383	0.179842	0.0460439	-0.0593575	-0.133047	-1.06382	-0.820501
Activator group 1	Ccnb1	0.508089	0.578931	0.522135	0.191928	0.12765	-0.0687113	-0.10726	-1.0407	-1.06664
Activator group 1	Ccnb2	0.524935	0.610804	0.551315	0.143609	0.115742	-0.0612459	-0.153992	-0.941387	-0.979967
Activator group 1	Ccnd1	0.47099	0.582929	0.612578	0.164957	0.00360259	-0.0552669	-0.144459	-0.922016	-0.682937
Activator group 1	Ccnd2	0.137592	0.163368	0.291516	0.183467	0.155662	0.0805004	0.0146488	-0.504958	-0.415596
Activator group 1	Ccne1	0.248784	0.264377	0.23064	0.118072	0.0842332	-0.0483014	-0.00323855	-0.542204	-0.521349
Activator group 1	Ccne2	0.481936	0.564798	0.458232	0.0448156	-0.0610989	-0.134414	-0.151003	-0.747194	-0.687521
Activator group 1	Cdc20	0.481139	0.613385	0.562192	0.162613	0.161039	-0.0196668	-0.151355	-0.938711	-0.982363
Activator group 1	Cdc25c	0.478999	0.495986	0.500168	0.128837	0.0183159	-0.107302	-0.158953	-0.802406	-0.730939
Activator group 1	Cdc6	0.365626	0.428618	0.255628	-0.0419549	-0.0336192	-0.158695	-0.137732	-0.518322	-0.482835
Activator group 1	Cdc7	0.378778	0.477095	0.254364	-0.0467276	-0.121962	-0.20601	-0.219762	-0.563173	-0.33537
Activator group 1	Cdca8	0.469377	0.607121	0.536198	0.1389	0.101692	-0.0697797	-0.181642	-0.963384	-0.876048
Activator group 1	Cdk2	0.402984	0.410653	0.255385	-0.0666554	-0.0398389	-0.196832	-0.282039	-0.484165	-0.317768
Activator group 1	Cdk4	0.156372	0.199299	0.235028	0.15971	0.0922709	0.00272077	-0.014732	-0.495058	-0.500337
Activator group 1	Cdkn2c	0.214333	0.38395	0.200538	-0.0572482	-0.162086	-0.153695	-0.223769	-0.354016	0.0108346
Activator group 1	Cdkn2d	0.376483	0.305897	0.194112	-0.070858	-0.0559359	-0.116953	-0.183402	-0.230174	-0.285554
Activator group 1	Cdt1	0.461574	0.519022	0.386051	0.00644005	-0.0777519	-0.131931	-0.262595	-0.634394	-0.282578
Activator group 1	Cenpa	0.508704	0.57439	0.555542	0.145879	0.0952318	-0.0262148	-0.0991082	-0.917524	-0.933819
Activator group 1	Cenph	0.479279	0.501183	0.424497	0.0958793	0.0636555	-0.0821281	-0.120439	-0.776361	-0.719227
Activator group 1	Cenpi	0.413708	0.412487	0.317253	0.0560444	-0.00911997	-0.105178	-0.0963637	-0.695964	-0.629643
Activator group 1	Cenpk	0.496248	0.559608	0.464754	0.0714046	-0.00792123	-0.106772	-0.209571	-0.824397	-0.570841
Activator group 1	Cenpl	0.372654	0.420403	0.327318	-0.0399524	-0.0280331	-0.172181	-0.170492	-0.480341	-0.479949
Activator group 1	Cenpm	0.411421	0.388729	0.355638	0.0388735	0.0512648	-0.0586183	-0.101482	-0.679102	-0.594421
Activator group 1	Cenpp	0.323	0.334889	0.291844	0.058657	0.0488262	-0.104375	-0.146244	-0.517312	-0.468238
Activator group 1	Cenpq	0.286738	0.340469	0.313365	0.0804343	-0.0474493	-0.110424	-0.0816115	-0.473418	-0.495662
Activator group 1	Cep192	0.427072	0.400941	0.17383	-0.128844	-0.10299	-0.222013	-0.223914	-0.386431	-0.14756
Activator group 1	Cep57	0.31143	0.367033	0.326507	0.0732679	-0.0236383	-0.108979	-0.119128	-0.369463	-0.322263
Activator group 1	Cep70	0.285795	0.290221	0.196511	-0.0528658	0.0609275	-0.218462	-0.164694	-0.330342	-0.272286
Activator group 1	Cetn2	-0.0672729	-0.0541847	0.235404	0.230038	0.222064	0.154569	0.157952	-0.296309	-0.426736
Activator group 1	Chek1	0.420957	0.474131	0.285931	-0.0111503	-0.085727	-0.161525	-0.212294	-0.635259	-0.299083
Activator group 1	Chek2	0.138747	0.258836	0.241481	0.0660854	0.0817602	-0.068729	-0.00616502	-0.416894	-0.438448
Activator group 1	Cks1b	0.425317	0.555959	0.537952	0.150064	0.10752	-0.0197106	-0.19533	-0.846976	-0.766232
Activator group 1	Cpsf6	0.386936	0.392502	0.189302	-0.000804038	-0.0563348	-0.191852	-0.137926	-0.406041	-0.508641
Activator group 1	Ctbp2	0.219139	0.227396	0.191128	0.166534	-0.00859917	0.0304332	-0.0362428	-0.458692	-0.41183
Activator group 1	Dbf4	0.437344	0.53045	0.451848	0.154159	0.115555	-0.053403	-0.0910697	-0.852098	-0.988763
Activator group 1	Dhfr	0.492662	0.546067	0.487524	0.0868209	0.064356	-0.101693	-0.137652	-0.765342	-0.783444
Activator group 1	Dsn1	0.234188	0.277083	0.213834	0.108906	0.115124	-0.0833834	-0.0607632	-0.512321	-0.512165
Activator group 1	E2f1	0.38289	0.430733	0.180303	-0.0897333	-0.337059	-0.0824264	-0.183958	-0.248177	-0.0569676
Activator group 1	E2f3	0.0773222	0.115219	0.193783	0.155257	0.160832	0.0846489	0.0614429	-0.364899	-0.521188
Activator group 1	Ercc6l	0.317737	0.36715	0.279484	0.0905531	0.0957504	-0.0648705	-0.0641538	-0.675508	-0.660248
Activator group 1	Espl1	0.330679	0.322086	0.235202	0.00210288	-0.0467711	-0.105907	-0.106083	-0.455248	-0.431527
Activator group 1	Fbxo5	0.557667	0.624857	0.562931	0.0857973	0.0380088	-0.0566339	-0.115843	-0.878892	-0.810572
Activator group 1	Fen1	0.329956	0.452507	0.408563	0.118863	0.0245152	-0.0597572	-0.19532	-0.753799	-0.504336
Activator group 1	Fgfr1op	0.0389186	0.06728	0.164253	0.200113	0.173703	0.0266307	0.0635515	-0.449176	-0.453799
Activator group 1	Fzd2	0.291611	0.204676	0.260426	0.123388	0.0466341	0.010794	-0.107026	-0.331926	-0.465668
Activator group 1	Gins1	0.468879	0.527587	0.433245	0.111757	0.0926149	-0.0864053	-0.12111	-0.915733	-0.777773
Activator group 1	Gli1	0.691146	0.60495	0.431726	0.107326	0.0429488	-0.0641278	-0.233405	-1.0122	-0.775867
Activator group 1	Gli2	0.408509	0.422016	0.0896993	-0.0842835	-0.121288	-0.12019	-0.160705	-0.113818	-0.493959
Activator group 1	Gli3	0.0979752	0.166729	0.374563	0.145541	0.0816499	0.034766	-0.00800032	-0.430835	-0.484835
Activator group 1	Gmnn	0.474981	0.577997	0.480865	0.14691	0.0674899	-0.0419979	-0.166582	-0.898981	-0.639463
Activator group 1	H2afx	0.369657	0.521244	0.477686	0.137458	0.132683	0.0157117	-0.119828	-0.829929	-0.836254
Activator group 1	Hdac1	0.0514539	0.0363479	0.187243	0.157084	0.128605	0.0698665	0.0407696	-0.327645	-0.427049
Activator group 1	Hhip	0.259968	0.328318	0.316787	0.0287093	-0.0811004	-0.16774	-0.0962589	-0.48541	-0.373611
Activator group 1	Id3	-0.0843414	0.0893411	0.34856	0.158304	0.043177	-0.0183495	-0.0274261	-0.296312	-0.250673
Activator group 1	Incenp	0.292895	0.220778	0.204379	0.149764	-0.0446229	0.0295234	0.0397299	-0.50556	-0.422403
Activator group 1	Kif18a	0.350936	0.369847	0.308097	0.00799818	-0.155717	-0.159037	-0.157086	-0.453075	-0.3753
Activator group 1	Kif20a	0.519326	0.640295	0.497686	0.109798	0.0721364	-0.108996	-0.173803	-0.981656	-0.920431
Activator group 1	Kif23	0.469737	0.511241	0.426793	0.0623693	0.0234677	-0.144719	-0.118864	-0.761698	-0.744318
Activator group 1	Kif2c	0.5835	0.654047	0.623434	0.137887	0.0767547	-0.0482413	-0.131443	-0.979654	-0.986072
Activator group 1	Klb	0.419833	0.484443	0.187921	-0.0146965	-0.0674633	-0.151941	-0.244202	-0.323321	-0.229656
Activator group 1	Kntc1	0.547522	0.587422	0.471388	0.0496814	0.0664697	-0.097812	-0.135984	-0.932815	-0.795966
Activator group 1	Lig1	0.467127	0.465642	0.340903	0.00873312	-0.0807542	-0.120557	-0.145306	-0.571969	-0.511248
Activator group 1	Lin9	0.156887	0.210141	0.264157	0.0718014	0.0497185	-0.0164741	-0.0884089	-0.290769	-0.334073
Activator group 1	Lmnb1	0.467078	0.518457	0.529937	0.190838	0.107798	0.0166983	-0.110236	-0.991873	-1.00228
Activator group 1	Mad2l1	0.557994	0.62496	0.55871	0.167257	0.133147	-0.0633438	-0.123707	-0.996515	-1.05622
Activator group 1	Mcm10	0.460918	0.53124	0.399509	0.0989697	0.0659396	-0.121207	-0.0951547	-0.803758	-0.755815
Activator group 1	Mcm2	0.489466	0.60013	0.417092	0.117789	0.0858201	-0.0841054	-0.181054	-0.999795	-0.611654
Activator group 1	Mcm3	0.506904	0.509471	0.413172	0.136862	0.136861	-0.067718	-0.114279	-0.93251	-0.915547
Activator group 1	Mcm4	0.4378	0.441766	0.271238	0.0114364	-0.127447	-0.131057	-0.239806	-0.534038	-0.357362
Activator group 1	Mcm5	0.532785	0.621859	0.498761	0.115803	0.0708964	-0.0779551	-0.208331	-0.991269	-0.818941
Activator group 1	Mcm6	0.396504	0.423609	0.293903	-0.0168453	-0.10614	-0.132485	-0.172758	-0.494009	-0.402042
Activator group 1	Mcm7	0.289214	0.304449	0.301199	0.132855	0.0435481	-0.0638851	-0.0672691	-0.568826	-0.609681
Activator group 1	Mcm8	0.351159	0.352016	0.197439	0.0120167	-0.0438647	-0.14222	-0.136305	-0.451485	-0.337874
Activator group 1	Mis12	0.26685	0.338835	0.234451	-0.0147106	-0.0316548	-0.112994	-0.152255	-0.36085	-0.318793
Activator group 1	Mlf1ip	0.333997	0.351464	0.295055	0.0710082	-0.0435356	-0.10645	-0.177996	-0.475706	-0.38688
Activator group 1	Ncam1	0.376807	0.42314	0.354688	-0.0243521	-0.151438	-0.127906	-0.152021	-0.301721	-0.320017
Activator group 1	Ndc80	0.484263	0.612199	0.432518	0.116711	0.0127388	-0.0997113	-0.127241	-0.847425	-0.881906
Activator group 1	Nek2	0.51457	0.548652	0.549733	0.11518	0.171072	-0.0724884	-0.0574314	-1.06457	-1.05996
Activator group 1	Npm1	0.0785582	0.158807	0.244932	0.172683	0.189082	0.0496771	-0.0911918	-0.471775	-0.429792
Activator group 1	Nsl1	0.35314	0.370141	0.201368	-0.0109195	-0.0487666	-0.177939	-0.129032	-0.451324	-0.312301
Activator group 1	Nuf2	0.574261	0.614516	0.535482	0.130505	0.0455377	-0.0859087	-0.156193	-0.932032	-0.906696
Activator group 1	Nup107	0.375218	0.386499	0.252375	-0.0552726	-0.0740973	-0.147587	-0.137373	-0.37009	-0.33572
Activator group 1	Nup133	0.347429	0.375756	0.37074	0.0554851	0.0730043	-0.00451766	-0.11813	-0.54331	-0.477941
Activator group 1	Nup37	0.281476	0.241305	0.241363	0.0737831	0.0347105	-0.0694905	-0.0321267	-0.456088	-0.406754
Activator group 1	Nup43	0.200709	0.213882	0.286499	0.136846	0.0467919	0.0446928	0.00925512	-0.438497	-0.37737
Activator group 1	Parp1	0.397592	0.381525	0.299347	-0.0941108	-0.133748	-0.143959	-0.240844	-0.193883	-0.0781616
Activator group 1	Pcna	0.326557	0.358529	0.307754	0.0645905	-0.0113323	-0.0977803	-0.26253	-0.540242	-0.382093
Activator group 1	Pkmyt1	0.377759	0.333717	0.148724	-0.0768681	-0.181831	-0.137823	-0.215265	-0.298936	-0.16567
Activator group 1	Plk1	0.516433	0.63341	0.554035	0.183921	0.0829432	0.011829	-0.176691	-0.912292	-0.903327
Activator group 1	Plk4	0.328063	0.352721	0.217935	0.0295549	0.0147307	-0.14149	-0.139433	-0.559321	-0.552383
Activator group 1	Pola1	0.415244	0.45734	0.284567	-0.00249863	-0.163537	-0.178682	-0.202961	-0.595545	-0.286579
Activator group 1	Pola2	0.319282	0.377356	0.262535	0.0122693	-0.0468691	-0.138352	-0.179635	-0.55515	-0.345739
Activator group 1	Pold1	0.355434	0.465297	0.327213	0.0242181	-0.103153	-0.122372	-0.144328	-0.437881	-0.372942
Activator group 1	Pold2	0.307421	0.327526	0.275209	0.0919085	-0.00275721	-0.0172476	-0.0730829	-0.565938	-0.388883
Activator group 1	Pold3	0.289292	0.335835	0.248529	-0.0323099	-0.0659625	-0.154515	-0.152073	-0.268092	-0.20756
Activator group 1	Pole	0.50037	0.571663	0.422624	0.0736639	-0.0263522	-0.112827	-0.158889	-0.85923	-0.682967
Activator group 1	Pole2	0.350696	0.402108	0.252334	0.0371305	-0.0808764	-0.0844831	-0.150426	-0.385566	-0.466756
Activator group 1	Ppp2r5e	-0.0388385	-0.052922	0.0979686	0.253184	0.222134	0.135525	0.142129	-0.3145	-0.43489
Activator group 1	Prim1	0.37733	0.406066	0.306359	0.0169508	-0.0552106	-0.135821	-0.182282	-0.615215	-0.399238
Activator group 1	Prim2	0.445787	0.401669	0.353298	-0.0377254	-0.128249	-0.125526	-0.151402	-0.388105	-0.329716
Activator group 1	Ptch1	0.667167	0.640386	0.404913	0.0944688	0.000269923	-0.0789787	-0.165885	-0.954924	-0.821039
Activator group 1	Ptch2	0.679781	0.622999	0.420133	0.133262	0.113492	-0.0690494	-0.198998	-1.01684	-1.05089
Activator group 1	Rbbp4	0.178595	0.155794	0.19078	0.182551	0.187016	-0.0077742	-0.0185983	-0.499032	-0.605061
Activator group 1	Rbl1	0.256308	0.408236	0.293274	0.0300421	-0.0732123	-0.114797	-0.116671	-0.527832	-0.328578
Activator group 1	Rfc3	0.365737	0.365615	0.275664	0.00234337	-0.0572525	-0.142572	-0.160658	-0.49573	-0.3586
Activator group 1	Rfc4	0.328392	0.427596	0.446139	0.128096	0.0449927	-0.0472307	-0.13235	-0.749754	-0.60833
Activator group 1	Rfc5	0.307365	0.344947	0.249528	0.0412281	-0.00294551	-0.102911	-0.107749	-0.563402	-0.405737
Activator group 1	Ror2	0.150576	0.192189	0.334262	0.169287	0.0116666	0.0756093	0.0198919	-0.396009	-0.57666
Activator group 1	Rpa2	0.37997	0.381133	0.280553	0.0341455	-0.0768077	-0.0866395	-0.155117	-0.460584	-0.375575
Activator group 1	Rpa3	0.120869	0.217238	0.288931	0.148436	0.0891392	0.0128953	0.00775433	-0.478606	-0.446964
Activator group 1	Rrm2	0.477534	0.493348	0.371445	0.0853033	0.0824256	-0.0715436	-0.104474	-0.786483	-0.87441
Activator group 1	Ruvbl1	0.280873	0.396485	0.275029	0.0190306	0.0168924	-0.100755	-0.251908	-0.441992	-0.284563
Activator group 1	Ruvbl2	0.139681	0.226731	0.152765	0.135875	0.130185	0.0156766	-0.0388089	-0.480868	-0.47121
Activator group 1	Sec13	-0.078224	-0.0585994	0.126088	0.202243	0.233877	0.063282	0.0417065	-0.364378	-0.372798
Activator group 1	Seh1l	-0.00612876	-0.0239492	0.148167	0.205303	0.232681	0.0304899	0.12316	-0.40443	-0.590366
Activator group 1	Sgol1	0.496533	0.605975	0.506706	0.162617	0.0952248	-0.109322	-0.0790854	-0.954179	-1.0216
Activator group 1	Sgol2	0.480845	0.522716	0.451257	0.109928	-0.00706258	-0.096303	-0.100031	-0.805287	-0.770888
Activator group 1	Shh	0.625185	0.651296	0.597327	0.148753	0.0973258	-0.0861363	-0.121	-1.04979	-1.21951
Activator group 1	Skp2	0.487511	0.54568	0.492294	0.102068	0.0932087	-0.0846008	-0.122599	-0.848571	-0.844483
Activator group 1	Smc3	0.202955	0.215198	0.20387	0.0840278	0.0456046	-0.0114631	-0.108256	-0.432367	-0.395028
Activator group 1	Smo	0.393643	0.39011	0.146588	-0.0780341	-0.137883	-0.119976	-0.133416	-0.239492	-0.366305
Activator group 1	Spc24	0.567174	0.65824	0.55345	0.0956009	0.0863969	-0.111204	-0.158193	-0.959896	-0.907653
Activator group 1	Spc25	0.509983	0.630836	0.540128	0.142907	0.0653291	-0.0719203	-0.125235	-0.933023	-0.916527
Activator group 1	Tcf19	0.326458	0.330568	0.240022	0.095068	0.050981	-0.0930614	-0.205634	-0.594926	-0.413042
Activator group 1	Tcf7	0.00845897	-0.0655546	0.109243	0.263679	0.20848	0.159532	0.157065	-0.390078	-0.546467
Activator group 1	Terf1	0.295052	0.340875	0.246542	0.00335747	-0.064238	-0.103312	-0.0930279	-0.30484	-0.304113
Activator group 1	Tgif2	0.212174	0.217068	0.255217	0.18414	0.0606344	-0.023461	0.0683904	-0.491375	-0.620718
Activator group 1	Ttk	0.435347	0.442434	0.283597	-0.0182798	-0.0627162	-0.125162	-0.229079	-0.489104	-0.276721
Activator group 1	Ube2c	0.56149	0.608905	0.552446	0.184588	0.123867	-0.00427941	-0.119097	-1.02361	-1.10213
Activator group 1	Wif1	0.515584	0.554717	0.679159	0.160845	0.0838463	-0.0303298	-0.123818	-0.953621	-0.995008
Activator group 1	Xpo1	0.272323	0.376103	0.0901439	0.00544627	-0.149664	-0.140314	-0.145079	-0.465213	-0.233775
Activator group 1	Zwilch	0.469448	0.564618	0.472216	0.0919632	0.0982601	-0.10681	-0.104571	-0.921752	-0.920974

## Sheet: Activator, group 2
Group	Gene	Anagen 1	Anagen 2	Anagen 3	Anagen 4	Anagen 5	Catagen 1	Catagen 2	Catagen 3	Telogen
Activator group 2	Adam17	0.205047	0.184006	-0.0775803	-0.213977	-0.246503	-0.143997	-0.216844	0.175752	0.347899
Activator group 2	Adcy4	0.173009	0.125956	-0.230146	-0.367073	-0.338081	-0.241988	-0.211904	0.28655	0.597142
Activator group 2	Adcy9	0.035472	0.101257	-0.0244987	-0.190111	-0.177971	-0.1108	-0.154598	0.29272	0.416475
Activator group 2	Amhr2	0.217579	0.194567	-0.0166726	-0.204718	-0.240075	-0.15265	-0.231917	0.152298	0.400261
Activator group 2	Ar	0.154951	0.159126	-0.0206436	-0.211272	-0.295533	-0.134212	-0.238377	0.179526	0.435083
Activator group 2	B2m	-0.0320397	0.0159086	-0.282126	-0.249485	-0.296699	-0.0799245	0.0176446	0.412005	0.763628
Activator group 2	Btrc	0.221354	0.141264	-0.169618	-0.270071	-0.308471	-0.174376	-0.135271	0.163823	0.350025
Activator group 2	Cacna1g	0.458958	0.430041	-0.104043	-0.466119	-0.558793	-0.357596	-0.359555	0.270791	0.256364
Activator group 2	Camk4	-0.0825067	-0.0934449	-0.0915963	-0.17049	-0.181351	-0.130142	-0.123826	0.490179	0.355884
Activator group 2	Ccnd3	-0.0270223	-0.0947437	-0.238761	-0.340474	-0.335403	-0.192792	-0.0751601	0.510247	0.726707
Activator group 2	Cdc14b	0.212479	0.175509	-0.118033	-0.307956	-0.339262	-0.22202	-0.246024	0.258874	0.58397
Activator group 2	Cdc25b	0.437798	0.380217	-0.0243371	-0.2283	-0.30798	-0.242909	-0.328146	0.00834762	0.053859
Activator group 2	Cdh2	0.24659	0.193029	-0.161778	-0.257435	-0.296812	-0.205995	-0.249104	0.178956	0.387247
Activator group 2	Cdk6	0.314766	0.273005	0.00745886	-0.216053	-0.299891	-0.141536	-0.256363	0.0374045	0.207507
Activator group 2	Cdkn1c	0.417883	0.36614	-0.0568655	-0.242063	-0.445034	-0.304698	-0.348409	0.0693867	-0.0179754
Activator group 2	Cfb	0.0289686	0.0492941	-0.307499	-0.331674	-0.468234	-0.229535	-0.127516	0.45293	0.827302
Activator group 2	Clip1	-0.053164	-0.134133	-0.160616	-0.0524077	-0.109789	-0.0292351	-0.0620821	0.466153	0.466187
Activator group 2	Cry2	0.164127	0.0858314	-0.0508148	-0.229648	-0.321994	-0.154585	-0.202765	0.215475	0.528467
Activator group 2	Csnk2a2	0.210928	0.109128	0.0497402	-0.200411	-0.233111	-0.0935214	-0.230387	0.242479	0.327413
Activator group 2	Ctdsp1	0.200139	0.149186	-0.0921547	-0.224189	-0.247588	-0.139234	-0.216602	0.169194	0.366064
Activator group 2	Daam2	0.445368	0.366735	-0.0532274	-0.21513	-0.308429	-0.238721	-0.264278	-0.0866202	0.132825
Activator group 2	Dag1	0.385361	0.349458	0.136227	-0.156397	-0.316866	-0.132951	-0.265806	0.0659001	0.229724
Activator group 2	Dbp	-0.0356586	-0.107537	-0.280641	-0.434015	-0.624901	-0.379319	-0.195252	0.728124	1.65526
Activator group 2	Dcn	0.146515	0.153703	-0.0687836	-0.24353	-0.354631	-0.162561	-0.211681	0.200354	0.476126
Activator group 2	Dtx3l	0.185717	0.144716	-0.0620632	-0.22237	-0.275926	-0.151495	-0.208607	0.185774	0.502618
Activator group 2	Fbxw4	0.188127	0.166565	0.00777928	-0.203621	-0.255837	-0.137903	-0.185161	0.175847	0.420759
Activator group 2	Fgf1	0.013911	-0.0942206	-0.345977	-0.231672	-0.0368995	-0.0885936	0.0303006	0.251078	0.557015
Activator group 2	Fgf18	-0.0735184	-0.0549961	-0.292062	-0.295561	-0.25935	-0.173094	-0.12994	0.454687	0.761986
Activator group 2	Fgf7	0.213895	0.239188	0.241683	-0.210322	-0.327278	-0.163434	-0.272958	0.158787	0.344383
Activator group 2	Fgfr1	0.221175	0.129286	-0.101326	-0.268482	-0.32485	-0.199195	-0.218338	0.264282	0.418792
Activator group 2	Frzb	0.410562	0.426997	-0.0399633	-0.395565	-0.443742	-0.321081	-0.341498	0.176488	0.395897
Activator group 2	Fst	0.165062	0.195044	0.108248	-0.227722	-0.250364	-0.129841	-0.219266	0.259298	0.410398
Activator group 2	Gas1	0.166195	0.163147	-0.146302	-0.26949	-0.329281	-0.10869	-0.212912	0.371271	0.50238
Activator group 2	Hist1h4h	0.15503	0.158816	-0.036965	-0.226335	-0.201356	-0.169978	-0.217795	0.20582	0.37491
Activator group 2	Hist2h2be	0.338845	0.373895	0.228304	-0.141264	-0.307058	-0.237883	-0.273004	-0.0368167	0.192366
Activator group 2	Igfbp4	0.328948	0.367617	0.170799	-0.186021	-0.359648	-0.173745	-0.171967	0.0569137	-0.0112442
Activator group 2	Il17rd	0.195669	0.196392	0.172496	-0.204449	-0.308022	-0.215436	-0.257529	0.134576	0.323536
Activator group 2	Itpr2	0.207972	0.137517	-0.0248349	-0.224958	-0.251084	-0.135825	-0.205687	0.205322	0.451222
Activator group 2	Kdr	0.376538	0.325878	-0.0121386	-0.167868	-0.366499	-0.18796	-0.18967	-0.174807	0.220337
Activator group 2	Klf4	0.159005	0.117437	-0.0321443	-0.210155	-0.289449	-0.0727162	-0.146349	0.26006	0.394826
Activator group 2	Lefty1	0.227106	0.217538	0.184993	-0.157949	-0.276118	-0.138546	-0.259641	0.0325774	0.429285
Activator group 2	Lmna	0.236373	0.195674	-0.0448717	-0.237574	-0.248075	-0.11225	-0.212086	0.234145	0.373192
Activator group 2	Lrp1	-0.00269227	-0.0412607	-0.416701	-0.525215	-0.425099	-0.402755	-0.133405	0.596484	0.837154
Activator group 2	Mapk12	-0.0808737	-0.0455388	-0.231397	-0.249723	-0.0642067	-0.108905	-0.0397026	0.212454	0.466674
Activator group 2	Mapk8	0.216671	0.166146	-0.0755403	-0.251473	-0.244393	-0.198677	-0.238014	0.169954	0.403134
Activator group 2	Mef2c	0.193282	0.147818	-0.171218	-0.27039	-0.229604	-0.199932	-0.212678	0.194813	0.446802
Activator group 2	Mvp	0.177819	0.148318	-0.0614441	-0.252153	-0.21638	-0.0996993	-0.171277	0.232889	0.497895
Activator group 2	Ncor2	0.250266	0.145915	-0.119043	-0.221226	-0.258947	-0.112775	-0.142661	0.212338	0.295257
Activator group 2	Nedd1	0.239552	0.278106	0.00849653	-0.184246	-0.234488	-0.217316	-0.238093	-0.0183385	0.225519
Activator group 2	Nfatc2	-0.038947	-0.0306583	-0.171651	-0.230426	-0.335878	-0.0435636	-0.125408	0.518252	0.705201
Activator group 2	Nos3	0.292563	0.240479	-0.11244	-0.202245	-0.240026	-0.169265	-0.246154	0.139216	0.344605
Activator group 2	Notch4	0.188757	0.128185	-0.0879645	-0.240714	-0.277052	-0.189121	-0.216121	0.256862	0.38586
Activator group 2	Npas2	0.33225	0.280266	-0.060747	-0.193529	-0.276595	-0.169047	-0.232533	0.143268	0.130915
Activator group 2	Nr1d1	0.340367	0.231474	-0.138389	-0.302017	-0.527823	-0.213292	-0.379358	0.406137	1.01108
Activator group 2	Nr4a1	0.0500733	-0.00866155	-0.170317	-0.298067	-0.388921	-0.171422	-0.165983	0.5441	0.852187
Activator group 2	Pcnt	0.208416	0.15867	0.0391297	-0.216837	-0.249777	-0.135837	-0.205952	0.171377	0.364079
Activator group 2	Per1	-0.142552	-0.531805	-0.52824	-0.573697	-0.268204	-0.385975	0.133658	0.885022	0.820254
Activator group 2	Per2	-0.16085	-0.17237	-0.16226	-0.173941	-0.152207	-0.0835664	0.0229709	0.156119	0.623585
Activator group 2	Pik3ca	0.18278	0.179972	0.036843	-0.186658	-0.261589	-0.173122	-0.201224	0.252587	0.381506
Activator group 2	Pik3cd	0.16232	0.107753	-0.0724372	-0.214298	-0.311331	-0.160465	-0.200451	0.217447	0.487834
Activator group 2	Pik3cg	0.163267	0.144036	-0.0884607	-0.213511	-0.263708	-0.171107	-0.186916	0.218907	0.454804
Activator group 2	Pik3r1	0.0848549	0.0258837	-0.317993	-0.309755	-0.51459	-0.160877	-0.100542	0.484052	0.746035
Activator group 2	Pik3r5	0.175969	0.0975913	-0.117024	-0.227255	-0.261116	-0.146953	-0.142735	0.252242	0.480605
Activator group 2	Pitx2	0.214738	0.208293	-0.100535	-0.207412	-0.270503	-0.172982	-0.202918	0.128094	0.444894
Activator group 2	Pla2g12a	0.378801	0.334954	0.14092	-0.13377	-0.180412	-0.20669	-0.26982	-0.032923	0.254997
Activator group 2	Plcb1	0.261424	0.222421	-0.0404352	-0.200847	-0.343638	-0.191168	-0.200609	0.135874	0.327736
Activator group 2	Plcg2	0.13164	0.116818	-0.153475	-0.224757	-0.250309	-0.0863615	-0.166669	0.249765	0.464943
Activator group 2	Pparg	0.379941	0.455239	0.16302	-0.165045	-0.427817	-0.216702	-0.300998	-0.021064	0.336974
Activator group 2	Ppargc1a	0.0803683	0.000343883	-0.121613	-0.202957	-0.0900205	-0.080741	-0.106701	0.335878	0.40566
Activator group 2	Ppp2r5c	0.200225	0.114829	-0.0445141	-0.171889	-0.190085	-0.166461	-0.237436	0.210985	0.367936
Activator group 2	Ppp3ca	0.194889	0.150373	-0.0579229	-0.22333	-0.257188	-0.128627	-0.204843	0.240795	0.466826
Activator group 2	Prkacb	0.164521	0.159456	-0.0358441	-0.235952	-0.281098	-0.157824	-0.153967	0.17395	0.358928
Activator group 2	Prkar2b	0.245038	0.178087	-0.00983218	-0.206656	-0.236486	-0.224553	-0.24612	0.14912	0.353635
Activator group 2	Psmb9	0.0383099	0.111078	-0.266579	-0.336255	-0.424593	-0.182642	-0.0934529	0.490668	1.01792
Activator group 2	Rfc2	0.38454	0.397662	0.256768	-0.135789	-0.21369	-0.148894	-0.189987	-0.194016	0.0334351
Activator group 2	Rora	0.190665	0.122528	0.045283	-0.222704	-0.227493	-0.144443	-0.249082	0.21838	0.49363
Activator group 2	Rspo1	0.529861	0.492531	-0.0557129	-0.366064	-0.417541	-0.301471	-0.374787	0.0952965	0.140168
Activator group 2	Sdc2	0.196334	0.130078	-0.14637	-0.232682	-0.437776	-0.197962	-0.204756	0.268724	0.465941
Activator group 2	Serpine1	-0.0799605	-0.114991	-0.186793	-0.201909	-0.240958	-0.154423	-0.0597776	0.3056	0.693712
Activator group 2	Sfrp5	0.224945	0.148815	-0.125584	-0.224392	-0.230669	-0.114584	-0.255432	0.236312	0.489193
Activator group 2	Ski	0.195262	0.15986	-0.0930052	-0.249358	-0.30164	-0.131305	-0.176985	0.146361	0.298453
Activator group 2	Sostdc1	0.44898	0.406603	0.160775	-0.192175	-0.255538	-0.221753	-0.323526	-0.0365393	0.00031939
Activator group 2	Sox17	0.00560705	-0.0778614	-0.401216	-0.527369	-0.412266	-0.442983	0.0172753	0.70068	0.668454
Activator group 2	Spry2	0.3107	0.311501	0.115085	-0.211378	-0.254003	-0.155215	-0.265529	0.155244	0.313224
Activator group 2	Stat3	0.198571	0.169447	-0.140541	-0.248358	-0.243484	-0.136292	-0.161764	0.261101	0.334759
Activator group 2	Tcf3	0.226888	0.207633	-0.00595763	-0.249502	-0.312408	-0.154668	-0.193291	0.221756	0.289244
Activator group 2	Tcf4	0.299681	0.193805	-0.165159	-0.285713	-0.314527	-0.229041	-0.233709	0.207074	0.352917
Activator group 2	Tcf7l2	0.294154	0.283925	0.176715	-0.216135	-0.245606	-0.116322	-0.287798	0.236638	0.158792
Activator group 2	Tgfb3	0.432666	0.418155	-0.0806011	-0.452553	-0.517891	-0.355112	-0.408079	0.270183	0.397477
Activator group 2	Ube2d1	0.196514	0.17484	-0.00190663	-0.217183	-0.255903	-0.131843	-0.243065	0.203241	0.499174
Activator group 2	Vcan	0.895497	0.890591	0.508681	-0.224286	-0.680285	-0.507551	-0.552848	-0.28558	-0.270292
Activator group 2	Wee1	0.210121	0.136449	-0.124124	-0.183479	-0.296564	-0.19533	-0.199926	0.133141	0.487105
Activator group 2	Wisp1	0.430589	0.386033	0.0988298	-0.158406	-0.275909	-0.136798	-0.240526	-0.188143	-0.0842922
Activator group 2	Wnt2	0.109069	0.103052	-0.156653	-0.177196	-0.244354	-0.13709	-0.133345	0.157134	0.554753
Activator group 2	Wnt7b	0.276703	0.381315	0.0455247	-0.196242	-0.229023	-0.18396	-0.153833	0.318874	0.48367

## Sheet: Inhibitor, group 1
Group	Gene	Anagen 1	Anagen 2	Anagen 3	Anagen 4	Anagen 5	Catagen 1	Catagen 2	Catagen 3	Telogen
Inhibitor group 1	Adcy1	-0.506372	-0.619432	-0.325518	0.205394	0.549246	0.150792	0.46953	-0.320252	-0.368285
Inhibitor group 1	Bambi	-1.84409	-1.38899	0.198821	1.07363	1.30134	0.977462	1.21274	0.259992	-2.05828
Inhibitor group 1	Bmp2	-0.362743	-0.426182	-0.0339667	0.13374	0.22999	0.264328	0.268988	0.372266	-0.180922
Inhibitor group 1	Bmp2k	-0.408532	-0.412139	0.108752	0.388965	0.43673	0.350284	0.364893	-0.115452	-0.645354
Inhibitor group 1	Bmp4	-0.247376	-0.334152	-0.0552321	0.208985	0.175343	0.157985	0.258108	0.0630489	-0.344279
Inhibitor group 1	Bmp6	-0.566642	-0.619923	-0.301797	0.177097	0.494765	0.123606	0.428075	-0.0760268	-0.376042
Inhibitor group 1	Bmp7	-0.769607	-0.807955	-0.444178	0.227674	0.547565	0.198027	0.563265	0.201832	-0.668223
Inhibitor group 1	Bmp8a	-0.677136	-0.557284	0.214309	0.504693	0.515456	0.431407	0.482907	-0.139065	-0.752264
Inhibitor group 1	Bmpr1a	-0.306336	-0.331609	-0.110554	0.183908	0.308549	0.147325	0.256659	-0.0913802	-0.536445
Inhibitor group 1	Bmpr1b	-0.215641	-0.294751	-0.304488	-0.0371012	0.212378	0.11767	0.203825	0.393843	-0.116786
Inhibitor group 1	Bmpr2	-0.360803	-0.366374	-0.120201	0.194646	0.34469	0.138629	0.279732	0.075995	-0.42541
Inhibitor group 1	Braf	-0.729185	-0.780609	-0.12149	0.514044	0.623709	0.38986	0.545356	-0.249264	-0.776351
Inhibitor group 1	Cdkn1a	-0.551357	-0.570648	0.104189	0.531824	0.561322	0.514714	0.478992	-0.155283	-0.627168
Inhibitor group 1	Cdkn2b	-0.355844	-0.3867	-0.149831	0.131707	0.179065	0.218504	0.333525	0.301432	-0.174312
Inhibitor group 1	Chd7	-0.514805	-0.649814	-0.276973	0.103159	0.490953	0.146547	0.429993	0.0393463	-0.335116
Inhibitor group 1	Clasp1	-0.497175	-0.525219	-0.112935	0.259612	0.451822	0.190512	0.391788	-0.204213	-0.424503
Inhibitor group 1	Cpt1a	-0.317243	-0.367427	0.0490677	0.104185	0.130753	0.184645	0.25392	0.36901	-0.274339
Inhibitor group 1	Csnk1e	-0.414906	-0.490966	0.281932	0.523113	0.493705	0.487816	0.39196	-0.268326	-0.76367
Inhibitor group 1	Csnk1g3	-0.557557	-0.525418	-0.0402038	0.381507	0.499634	0.335748	0.438492	-0.178054	-0.701347
Inhibitor group 1	Ctdsp2	-0.312197	-0.417975	-0.0829562	0.283788	0.313215	0.232173	0.282448	-0.107814	-0.230863
Inhibitor group 1	Ctnnb1	-0.279653	-0.34425	-0.109498	0.16015	0.249047	0.113035	0.240505	-0.0397662	-0.490209
Inhibitor group 1	Daam1	-0.299098	-0.357169	-0.11734	0.223125	0.265629	0.158974	0.245985	-0.0878485	-0.309461
Inhibitor group 1	Fbxw11	-0.395857	-0.544847	-0.162102	0.214961	0.351786	0.146989	0.346424	-0.0696512	-0.412202
Inhibitor group 1	Fgf22	-1.28522	-1.12002	-0.191816	0.625055	0.882619	0.589879	0.837807	0.186096	-1.10172
Inhibitor group 1	Fgf5	-0.622905	-0.645169	-0.296573	0.312247	0.5341	0.354734	0.564785	-0.246519	-0.538905
Inhibitor group 1	Fgfr3	-0.423801	-0.536935	-0.00221012	0.494723	0.539309	0.460879	0.528437	-0.37859	-0.827102
Inhibitor group 1	Foxn1	-1.20773	-1.02899	0.0627903	0.748333	0.914155	0.739859	0.886982	-0.300891	-1.2305
Inhibitor group 1	Fzd1	-0.270497	-0.341544	-0.0935744	0.157847	0.201742	0.13742	0.281239	-0.00587594	-0.350283
Inhibitor group 1	Fzd3	-0.321805	-0.3577	-0.118973	0.223601	0.269989	0.161062	0.265997	-0.0570257	-0.356063
Inhibitor group 1	Fzd5	-0.72941	-0.620202	0.0637688	0.499894	0.61595	0.469268	0.56877	-0.164602	-0.948941
Inhibitor group 1	Fzd6	-0.262731	-0.332079	0.00804169	0.203449	0.262177	0.180583	0.231226	0.128755	-0.371683
Inhibitor group 1	Gab1	-0.304597	-0.317722	-0.061825	0.131415	0.223882	0.178636	0.215519	0.0902588	-0.234717
Inhibitor group 1	Hbp1	-0.334558	-0.372905	-0.107882	0.078192	0.148726	0.119029	0.167711	0.257228	0.00199283
Inhibitor group 1	Hspa2	-0.572489	-0.537667	-0.0879353	0.268403	0.416875	0.275683	0.391655	0.258622	-0.461101
Inhibitor group 1	Hspb1	-0.302777	-0.350723	-0.20038	0.153025	0.17827	0.180636	0.24924	0.095127	-0.0406107
Inhibitor group 1	Id4	-0.286715	-0.313974	-0.044196	0.158841	0.258758	0.216442	0.236555	0.170039	-0.438536
Inhibitor group 1	Inhbb	-0.298509	-0.401606	-0.141059	0.0380624	0.0645149	0.250426	0.308458	0.695425	-0.296179
Inhibitor group 1	Jag1	-0.499408	-0.474124	-0.0311219	0.388514	0.478684	0.207742	0.388348	-0.131785	-0.5539
Inhibitor group 1	Jun	-0.274192	-0.366152	-0.0617309	0.134447	0.200331	0.243181	0.262748	0.264084	-0.103425
Inhibitor group 1	Kras	-0.263521	-0.281666	-0.189418	0.0896606	0.150046	0.137495	0.190805	0.225166	-0.319009
Inhibitor group 1	Kremen1	-0.428939	-0.470218	0.0183086	0.353474	0.390669	0.223447	0.330332	-0.219805	-0.435907
Inhibitor group 1	Mapk13	-0.601368	-0.6192	-0.275513	0.210074	0.452889	0.226746	0.459958	0.175443	-0.389379
Inhibitor group 1	Mef2d	-0.274322	-0.370159	-0.124161	0.206313	0.294817	0.2003	0.252003	-0.00783008	-0.103495
Inhibitor group 1	Mitf	-0.559131	-0.679459	-0.248752	0.270935	0.47564	0.230135	0.469114	0.191175	-0.574983
Inhibitor group 1	Mknk1	-0.567034	-0.579647	-0.357564	0.185804	0.382786	0.15994	0.386491	0.037843	-0.180537
Inhibitor group 1	Ncoa2	-0.54576	-0.593287	-0.240669	0.184355	0.42508	0.167089	0.392532	0.0195198	-0.398833
Inhibitor group 1	Nkd2	-0.720178	-0.64743	0.00901156	0.506191	0.617025	0.42021	0.524301	-0.477551	-0.795555
Inhibitor group 1	Numb	-0.804612	-0.820688	-0.427721	0.225641	0.550053	0.136791	0.571683	0.0301893	-0.643324
Inhibitor group 1	Pik3cb	-0.317674	-0.424471	-0.167787	0.123173	0.287511	0.163198	0.257671	0.0668738	-0.241272
Inhibitor group 1	Pik3r3	-0.817152	-0.686218	-0.107736	0.542371	0.681762	0.537269	0.666896	-0.348242	-1.06631
Inhibitor group 1	Pip5k1b	-0.305241	-0.345481	-0.0720574	0.184972	0.249976	0.136919	0.253145	-0.0772962	-0.254794
Inhibitor group 1	Pla2g2e	-1.55928	-1.29452	-0.236504	0.831533	1.09263	0.810806	1.01928	-0.176309	-1.28307
Inhibitor group 1	Pla2g2f	-0.556987	-0.694031	-0.284428	0.22005	0.44242	0.250033	0.403835	0.159911	-0.288664
Inhibitor group 1	Pla2g3	-0.257843	-0.337481	-0.198374	0.0667628	0.158104	0.164259	0.272077	0.0915022	-0.082155
Inhibitor group 1	Pla2g4b	-0.914193	-0.777503	-0.14716	0.620446	0.738997	0.543477	0.673205	-0.372828	-0.945655
Inhibitor group 1	Porcn	-0.354902	-0.389144	-0.148365	0.195508	0.303281	0.187122	0.308777	0.0166479	-0.378174
Inhibitor group 1	Ppm1a	-0.322352	-0.368058	-0.159327	0.156971	0.282274	0.144579	0.275789	-0.000291459	-0.374274
Inhibitor group 1	Ppp2r1b	-0.523464	-0.416736	0.157859	0.415183	0.490149	0.383766	0.356622	-0.224291	-0.641461
Inhibitor group 1	Prickle1	-0.600607	-0.549762	0.101564	0.325476	0.527668	0.244415	0.406497	-0.384111	-0.543384
Inhibitor group 1	Prkca	-0.34482	-0.375976	-0.192424	0.165324	0.324681	0.166855	0.281874	0.0356052	-0.412451
Inhibitor group 1	Prkx	-0.755932	-0.755765	-0.47253	0.164337	0.491868	0.103517	0.511574	0.282373	-0.544138
Inhibitor group 1	Rbx1	-0.279412	-0.371739	-0.0514845	0.108654	0.275682	0.117963	0.309608	-0.186419	-0.109237
Inhibitor group 1	Sfn	-0.50056	-0.508491	0.219727	0.491896	0.565521	0.451852	0.473558	-0.187205	-0.900896
Inhibitor group 1	Skil	-0.280286	-0.284004	-0.149418	0.141113	0.247082	0.103289	0.253497	0.0540576	-0.341441
Inhibitor group 1	Slc6a13	-0.6899	-0.682582	0.191587	0.597621	0.579663	0.495685	0.504015	-0.542784	-0.689634
Inhibitor group 1	Slc9a3r1	-0.474229	-0.423638	-0.0292776	0.313642	0.413835	0.308746	0.370837	-0.054384	-0.503595
Inhibitor group 1	Smad7	-0.497466	-0.574941	-0.153142	0.314227	0.457965	0.301393	0.4147	-0.0542132	-0.535256
Inhibitor group 1	Tfdp2	-0.33356	-0.36293	-0.115558	0.185389	0.358803	0.180607	0.262889	-0.119582	-0.41038
Inhibitor group 1	Them4	-0.471474	-0.374826	0.260435	0.373003	0.391908	0.271252	0.348434	-0.144223	-0.590253
Inhibitor group 1	Tnik	-0.366442	-0.38966	-0.00499354	0.201736	0.276896	0.192712	0.301784	0.0825661	-0.439679
Inhibitor group 1	Tuba4a	-0.41544	-0.385	0.207842	0.395797	0.424938	0.379743	0.363614	-0.142367	-0.598088
Inhibitor group 1	Ube2d3	-0.31424	-0.318615	-0.188282	0.146453	0.260188	0.155555	0.271138	-0.0896522	-0.201778
Inhibitor group 1	Vangl1	-0.303847	-0.328972	-0.0810663	0.178114	0.253701	0.178496	0.256006	0.0122049	-0.294591
Inhibitor group 1	Vangl2	-0.436521	-0.343786	0.122202	0.360843	0.403641	0.330527	0.35863	-0.233825	-0.540697
Inhibitor group 1	Wnt11	-0.764239	-0.609327	0.263236	0.555505	0.637245	0.487693	0.5874	-0.327461	-0.953229

## Sheet: Inhibitor, group 2
Group	Gene	Anagen 1	Anagen 2	Anagen 3	Anagen 4	Anagen 5	Catagen 1	Catagen 2	Catagen 3	Telogen
Inhibitor group 2	Bcl9	-0.257493	-0.326425	-0.117868	0.193187	0.328135	0.172339	0.256088	-0.170541	-0.252058
Inhibitor group 2	Bcr	-0.296986	-0.319743	0.00516195	0.194316	0.284879	0.275035	0.298307	-0.0758803	-0.269143
Inhibitor group 2	Ccrn4l	-0.35209	-0.360991	-0.0914245	0.197378	0.37595	0.22675	0.295654	-0.10966	-0.467618
Inhibitor group 2	Cdc14a	-0.426828	-0.331546	0.118357	0.291212	0.389708	0.290646	0.343389	-0.168034	-0.554969
Inhibitor group 2	Cenpt	-0.0716218	-0.0505463	0.0211544	0.197121	0.258121	0.114895	0.183164	-0.336923	-0.542835
Inhibitor group 2	Cep164	-0.114984	-0.0649613	0.130997	0.217492	0.241774	0.132647	0.175279	-0.32669	-0.38249
Inhibitor group 2	Csnk1d	-0.158867	-0.263103	0.0305964	0.241995	0.303171	0.160036	0.127141	-0.222596	-0.41861
Inhibitor group 2	Dkc1	0.0693734	0.152351	0.306023	0.336581	0.333653	0.19109	0.199389	-0.69966	-0.865122
Inhibitor group 2	Dynll1	-0.29448	-0.284737	-0.0827234	0.171297	0.226882	0.158392	0.264367	-0.0618769	-0.302108
Inhibitor group 2	E2f2	-0.109909	0.0450714	0.64994	0.442987	0.322442	0.361911	0.301451	-0.605661	-0.869741
Inhibitor group 2	Elovl3	-0.40048	-0.432238	0.307273	0.44347	0.416272	0.33371	0.328998	-0.315395	-0.561704
Inhibitor group 2	Fzd10	0.0347121	0.0653435	0.560621	0.466855	0.373601	0.358786	0.257542	-0.800229	-0.839449
Inhibitor group 2	Gadd45a	-0.258054	-0.279424	-0.0461427	0.151692	0.279473	0.152177	0.239789	0.0883968	-0.468435
Inhibitor group 2	Hprt1	-0.0420599	-0.06203	0.118458	0.224396	0.230236	0.108432	0.0323905	-0.387291	-0.345883
Inhibitor group 2	Hsp90aa1	-0.0721918	-0.0810747	0.00280748	0.234224	0.292197	0.0943629	0.200391	-0.444843	-0.637455
Inhibitor group 2	Id1	-0.205383	-0.165067	0.213087	0.208603	0.201021	0.140603	0.108531	-0.170712	-0.380613
Inhibitor group 2	Kif2a	-0.0709749	-0.0454548	0.054464	0.196503	0.207022	0.0274956	0.132961	-0.318862	-0.507426
Inhibitor group 2	Lef1	-0.320804	-0.0264709	0.51147	0.503462	0.459924	0.315224	0.35368	-0.976074	-1.23346
Inhibitor group 2	Map3k7	-0.22938	-0.23015	0.00321712	0.221597	0.284958	0.154785	0.216098	-0.154318	-0.459436
Inhibitor group 2	Mapre1	-0.149402	-0.179641	-0.0124763	0.158469	0.216311	0.0823602	0.192729	-0.169858	-0.493777
Inhibitor group 2	Msx1	-0.130007	-0.0781379	0.11128	0.209767	0.279461	0.0772631	0.133264	-0.361643	-0.461175
Inhibitor group 2	Msx2	-0.77304	-0.281255	0.661784	0.888575	0.998903	0.745462	0.848799	-0.318703	-2.40687
Inhibitor group 2	Mybl2	-0.404504	-0.397003	0.033263	0.383133	0.428186	0.356218	0.429874	-0.269402	-0.717651
Inhibitor group 2	Nlk	-0.175198	-0.154158	0.0202799	0.189837	0.259189	0.112723	0.183485	-0.270074	-0.406867
Inhibitor group 2	Notch1	-0.291697	-0.183336	0.257857	0.270805	0.331359	0.25261	0.168608	-0.196292	-0.498065
Inhibitor group 2	Nras	-0.223311	-0.281276	-0.054994	0.232718	0.194601	0.159997	0.232915	-0.122827	-0.218252
Inhibitor group 2	Ppp2cb	-0.290601	-0.299956	-0.0351511	0.219881	0.292909	0.17198	0.254398	-0.205419	-0.372421
Inhibitor group 2	Ppp3cb	-0.101233	-0.0578082	0.173648	0.258369	0.202413	0.151264	0.141206	-0.364002	-0.480931
Inhibitor group 2	Prkce	-0.279727	-0.346439	-0.0794991	0.198517	0.285492	0.157671	0.24518	-0.0891768	-0.150758
Inhibitor group 2	Psma7	-0.0676653	-0.0632877	0.176479	0.245794	0.257128	0.141627	0.150993	-0.306822	-0.425978
Inhibitor group 2	Psmb3	-0.0870231	-0.074299	0.130466	0.252987	0.246907	0.156473	0.148296	-0.318057	-0.425116
Inhibitor group 2	Psmd4	-0.336009	-0.369339	0.0697137	0.263441	0.23657	0.216261	0.284591	-0.063279	-0.46937
Inhibitor group 2	Psmd8	-0.274204	-0.326134	-0.0879461	0.186789	0.242889	0.169847	0.253233	-0.0656205	-0.266146
Inhibitor group 2	Pxn	-0.226154	-0.308513	0.0166114	0.268824	0.257836	0.180716	0.234513	-0.182728	-0.308243
Inhibitor group 2	Rangap1	-0.225928	-0.273349	-0.0633485	0.228126	0.307708	0.166985	0.253332	-0.239133	-0.504021
Inhibitor group 2	Rcc2	-0.0919901	-0.0230945	0.364402	0.48014	0.376263	0.330371	0.312807	-0.740282	-1.02886
Inhibitor group 2	Rpl13a	-0.065048	-0.0390469	0.133717	0.251396	0.290678	0.184105	0.141596	-0.402489	-0.459344
Inhibitor group 2	Rps6kb2	-0.310231	-0.325379	-0.038096	0.223792	0.258554	0.196274	0.288204	-0.129348	-0.332834
Inhibitor group 2	Rxra	-0.185632	-0.411295	-0.0649073	0.251354	0.180553	0.217382	0.2374	0.0197135	-0.207845
Inhibitor group 2	Setdb1	-0.248598	-0.281266	0.00699877	0.288433	0.28359	0.159729	0.24558	-0.301233	-0.456948
Inhibitor group 2	Sfrp1	-0.390328	-0.420995	0.122169	0.440902	0.395373	0.302007	0.343262	-0.292255	-0.539506
Inhibitor group 2	Smad2	-0.307491	-0.337641	-0.0414071	0.157288	0.313976	0.164407	0.20473	-0.102618	-0.329827
Inhibitor group 2	Smad5	-0.287326	-0.337237	0.0448898	0.298385	0.332332	0.186127	0.299016	-0.258725	-0.518892
Inhibitor group 2	Smc1a	-0.0609209	-0.114772	0.104752	0.286419	0.260437	0.0925162	0.191535	-0.357798	-0.494637
Inhibitor group 2	Tbl1xr1	-0.107623	-0.0883844	-0.00577724	0.25793	0.277578	0.11779	0.17458	-0.264197	-0.452107
Inhibitor group 2	Wnt5a	-0.0625782	0.036248	0.293089	0.365207	0.427046	0.252983	0.298006	-0.732962	-1.17302
Inhibitor group 2	Ywhaz	-0.197499	-0.262317	-0.0943531	0.19743	0.217665	0.131963	0.214644	-0.157559	-0.310291

## Sheet: Pathway analysis
Pathway	Gene	Pathway enrichment sets	DB link	Anagen 1	Anagen 2	Anagen 3	Anagen 4	Anagen 5	Catagen 1	Catagen 2	Catagen 3	Telogen	Group
WNT_SIGNALING	Foxn1	WNT_SIGNALING	http://www.broadinstitute.org/gsea/msigdb/cards/WNT_SIGNALING	-1.20773	-1.02899	0.0627903	0.748333	0.914155	0.739859	0.886982	-0.300891	-1.2305	Inhibitor group 1
WNT_SIGNALING	Slc9a3r1	WNT_SIGNALING	http://www.broadinstitute.org/gsea/msigdb/cards/WNT_SIGNALING	-0.474229	-0.423638	-0.0292776	0.313642	0.413835	0.308746	0.370837	-0.054384	-0.503595	Inhibitor group 1
WNT_SIGNALING	Slc6a13	ST_WNT_CA2_CYCLIC_GMP_PATHWAY	http://www.broadinstitute.org/gsea/msigdb/cards/ST_WNT_CA2_CYCLIC_GMP_PATHWAY	-0.6899	-0.682582	0.191587	0.597621	0.579663	0.495685	0.504015	-0.542784	-0.689634	Inhibitor group 1
WNT_SIGNALING	Kremen1	PID_WNT_SIGNALING_PATHWAY	http://www.broadinstitute.org/gsea/msigdb/cards/PID_WNT_SIGNALING_PATHWAY	-0.428939	-0.470218	0.0183086	0.353474	0.390669	0.223447	0.330332	-0.219805	-0.435907	Inhibitor group 1
WNT_SIGNALING	Chd7	PID_WNT_NONCANONICAL_PATHWAY	http://www.broadinstitute.org/gsea/msigdb/cards/PID_WNT_NONCANONICAL_PATHWAY	-0.514805	-0.649814	-0.276973	0.103159	0.490953	0.146547	0.429993	0.0393463	-0.335116	Inhibitor group 1
WNT_SIGNALING	Pip5k1b	PID_WNT_CANONICAL_PATHWAY	http://www.broadinstitute.org/gsea/msigdb/cards/PID_WNT_CANONICAL_PATHWAY	-0.305241	-0.345481	-0.0720574	0.184972	0.249976	0.136919	0.253145	-0.0772962	-0.254794	Inhibitor group 1
WNT_SIGNALING	Mitf	PID_BETA_CATENIN_NUC_PATHWAY	http://www.broadinstitute.org/gsea/msigdb/cards/PID_BETA_CATENIN_NUC_PATHWAY	-0.559131	-0.679459	-0.248752	0.270935	0.47564	0.230135	0.469114	0.191175	-0.574983	Inhibitor group 1
WNT_SIGNALING	Ncoa2	PID_BETA_CATENIN_NUC_PATHWAY	http://www.broadinstitute.org/gsea/msigdb/cards/PID_BETA_CATENIN_NUC_PATHWAY	-0.54576	-0.593287	-0.240669	0.184355	0.42508	0.167089	0.392532	0.0195198	-0.398833	Inhibitor group 1
WNT_SIGNALING	Sfn	PID_BETA_CATENIN_NUC_PATHWAY	http://www.broadinstitute.org/gsea/msigdb/cards/PID_BETA_CATENIN_NUC_PATHWAY	-0.50056	-0.508491	0.219727	0.491896	0.565521	0.451852	0.473558	-0.187205	-0.900896	Inhibitor group 1
WNT_SIGNALING	Tnik	PID_BETA_CATENIN_NUC_PATHWAY	http://www.broadinstitute.org/gsea/msigdb/cards/PID_BETA_CATENIN_NUC_PATHWAY	-0.366442	-0.38966	-0.00499354	0.201736	0.276896	0.192712	0.301784	0.0825661	-0.439679	Inhibitor group 1
WNT_SIGNALING	Hbp1	PID_BETA_CATENIN_NUC_PATHWAY	http://www.broadinstitute.org/gsea/msigdb/cards/PID_BETA_CATENIN_NUC_PATHWAY	-0.334558	-0.372905	-0.107882	0.078192	0.148726	0.119029	0.167711	0.257228	0.00199283	Inhibitor group 1
WNT_SIGNALING	Wnt11	KEGG_WNT_SIGNALING_PATHWAY	http://www.broadinstitute.org/gsea/msigdb/cards/KEGG_WNT_SIGNALING_PATHWAY	-0.764239	-0.609327	0.263236	0.555505	0.637245	0.487693	0.5874	-0.327461	-0.953229	Inhibitor group 1
WNT_SIGNALING	Prkx	KEGG_WNT_SIGNALING_PATHWAY	http://www.broadinstitute.org/gsea/msigdb/cards/KEGG_WNT_SIGNALING_PATHWAY	-0.755932	-0.755765	-0.47253	0.164337	0.491868	0.103517	0.511574	0.282373	-0.544138	Inhibitor group 1
WNT_SIGNALING	Fzd5	KEGG_WNT_SIGNALING_PATHWAY	http://www.broadinstitute.org/gsea/msigdb/cards/KEGG_WNT_SIGNALING_PATHWAY	-0.72941	-0.620202	0.0637688	0.499894	0.61595	0.469268	0.56877	-0.164602	-0.948941	Inhibitor group 1
WNT_SIGNALING	Nkd2	KEGG_WNT_SIGNALING_PATHWAY	http://www.broadinstitute.org/gsea/msigdb/cards/KEGG_WNT_SIGNALING_PATHWAY	-0.720178	-0.64743	0.00901156	0.506191	0.617025	0.42021	0.524301	-0.477551	-0.795555	Inhibitor group 1
WNT_SIGNALING	Prickle1	KEGG_WNT_SIGNALING_PATHWAY	http://www.broadinstitute.org/gsea/msigdb/cards/KEGG_WNT_SIGNALING_PATHWAY	-0.600607	-0.549762	0.101564	0.325476	0.527668	0.244415	0.406497	-0.384111	-0.543384	Inhibitor group 1
WNT_SIGNALING	Ppp2r1b	KEGG_WNT_SIGNALING_PATHWAY	http://www.broadinstitute.org/gsea/msigdb/cards/KEGG_WNT_SIGNALING_PATHWAY	-0.523464	-0.416736	0.157859	0.415183	0.490149	0.383766	0.356622	-0.224291	-0.641461	Inhibitor group 1
WNT_SIGNALING	Vangl2	KEGG_WNT_SIGNALING_PATHWAY	http://www.broadinstitute.org/gsea/msigdb/cards/KEGG_WNT_SIGNALING_PATHWAY	-0.436521	-0.343786	0.122202	0.360843	0.403641	0.330527	0.35863	-0.233825	-0.540697	Inhibitor group 1
WNT_SIGNALING	Csnk1e	KEGG_WNT_SIGNALING_PATHWAY	http://www.broadinstitute.org/gsea/msigdb/cards/KEGG_WNT_SIGNALING_PATHWAY	-0.414906	-0.490966	0.281932	0.523113	0.493705	0.487816	0.39196	-0.268326	-0.76367	Inhibitor group 1
WNT_SIGNALING	Fbxw11	KEGG_WNT_SIGNALING_PATHWAY	http://www.broadinstitute.org/gsea/msigdb/cards/KEGG_WNT_SIGNALING_PATHWAY	-0.395857	-0.544847	-0.162102	0.214961	0.351786	0.146989	0.346424	-0.0696512	-0.412202	Inhibitor group 1
WNT_SIGNALING	Porcn	KEGG_WNT_SIGNALING_PATHWAY	http://www.broadinstitute.org/gsea/msigdb/cards/KEGG_WNT_SIGNALING_PATHWAY	-0.354902	-0.389144	-0.148365	0.195508	0.303281	0.187122	0.308777	0.0166479	-0.378174	Inhibitor group 1
WNT_SIGNALING	Prkca	KEGG_WNT_SIGNALING_PATHWAY	http://www.broadinstitute.org/gsea/msigdb/cards/KEGG_WNT_SIGNALING_PATHWAY	-0.34482	-0.375976	-0.192424	0.165324	0.324681	0.166855	0.281874	0.0356052	-0.412451	Inhibitor group 1
WNT_SIGNALING	Fzd3	KEGG_WNT_SIGNALING_PATHWAY	http://www.broadinstitute.org/gsea/msigdb/cards/KEGG_WNT_SIGNALING_PATHWAY	-0.321805	-0.3577	-0.118973	0.223601	0.269989	0.161062	0.265997	-0.0570257	-0.356063	Inhibitor group 1
WNT_SIGNALING	Vangl1	KEGG_WNT_SIGNALING_PATHWAY	http://www.broadinstitute.org/gsea/msigdb/cards/KEGG_WNT_SIGNALING_PATHWAY	-0.303847	-0.328972	-0.0810663	0.178114	0.253701	0.178496	0.256006	0.0122049	-0.294591	Inhibitor group 1
WNT_SIGNALING	Daam1	KEGG_WNT_SIGNALING_PATHWAY	http://www.broadinstitute.org/gsea/msigdb/cards/KEGG_WNT_SIGNALING_PATHWAY	-0.299098	-0.357169	-0.11734	0.223125	0.265629	0.158974	0.245985	-0.0878485	-0.309461	Inhibitor group 1
WNT_SIGNALING	Rbx1	KEGG_WNT_SIGNALING_PATHWAY	http://www.broadinstitute.org/gsea/msigdb/cards/KEGG_WNT_SIGNALING_PATHWAY	-0.279412	-0.371739	-0.0514845	0.108654	0.275682	0.117963	0.309608	-0.186419	-0.109237	Inhibitor group 1
WNT_SIGNALING	Jun	KEGG_WNT_SIGNALING_PATHWAY	http://www.broadinstitute.org/gsea/msigdb/cards/KEGG_WNT_SIGNALING_PATHWAY	-0.274192	-0.366152	-0.0617309	0.134447	0.200331	0.243181	0.262748	0.264084	-0.103425	Inhibitor group 1
WNT_SIGNALING	Fzd6	KEGG_WNT_SIGNALING_PATHWAY	http://www.broadinstitute.org/gsea/msigdb/cards/KEGG_WNT_SIGNALING_PATHWAY	-0.262731	-0.332079	0.00804169	0.203449	0.262177	0.180583	0.231226	0.128755	-0.371683	Inhibitor group 1
WNT_SIGNALING	Ctnnb1	BIOCARTA_WNT_PATHWAY	http://www.broadinstitute.org/gsea/msigdb/cards/BIOCARTA_WNT_PATHWAY	-0.279653	-0.34425	-0.109498	0.16015	0.249047	0.113035	0.240505	-0.0397662	-0.490209	Inhibitor group 1
WNT_SIGNALING	Fzd1	BIOCARTA_WNT_PATHWAY	http://www.broadinstitute.org/gsea/msigdb/cards/BIOCARTA_WNT_PATHWAY	-0.270497	-0.341544	-0.0935744	0.157847	0.201742	0.13742	0.281239	-0.00587594	-0.350283	Inhibitor group 1
WNT_SIGNALING	Rpl13a	WNT_SIGNALING	http://www.broadinstitute.org/gsea/msigdb/cards/WNT_SIGNALING	-0.065048	-0.0390469	0.133717	0.251396	0.290678	0.184105	0.141596	-0.402489	-0.459344	Inhibitor group 2
WNT_SIGNALING	Hprt1	WNT_SIGNALING	http://www.broadinstitute.org/gsea/msigdb/cards/WNT_SIGNALING	-0.0420599	-0.06203	0.118458	0.224396	0.230236	0.108432	0.0323905	-0.387291	-0.345883	Inhibitor group 2
WNT_SIGNALING	Psmd4	REACTOME_SIGNALING_BY_WNT	http://www.broadinstitute.org/gsea/msigdb/cards/REACTOME_SIGNALING_BY_WNT	-0.336009	-0.369339	0.0697137	0.263441	0.23657	0.216261	0.284591	-0.063279	-0.46937	Inhibitor group 2
WNT_SIGNALING	Psmd8	REACTOME_SIGNALING_BY_WNT	http://www.broadinstitute.org/gsea/msigdb/cards/REACTOME_SIGNALING_BY_WNT	-0.274204	-0.326134	-0.0879461	0.186789	0.242889	0.169847	0.253233	-0.0656205	-0.266146	Inhibitor group 2
WNT_SIGNALING	Psmb3	REACTOME_SIGNALING_BY_WNT	http://www.broadinstitute.org/gsea/msigdb/cards/REACTOME_SIGNALING_BY_WNT	-0.0870231	-0.074299	0.130466	0.252987	0.246907	0.156473	0.148296	-0.318057	-0.425116	Inhibitor group 2
WNT_SIGNALING	Psma7	REACTOME_SIGNALING_BY_WNT	http://www.broadinstitute.org/gsea/msigdb/cards/REACTOME_SIGNALING_BY_WNT	-0.0676653	-0.0632877	0.176479	0.245794	0.257128	0.141627	0.150993	-0.306822	-0.425978	Inhibitor group 2
WNT_SIGNALING	Setdb1	PID_WNT_NONCANONICAL_PATHWAY	http://www.broadinstitute.org/gsea/msigdb/cards/PID_WNT_NONCANONICAL_PATHWAY	-0.248598	-0.281266	0.00699877	0.288433	0.28359	0.159729	0.24558	-0.301233	-0.456948	Inhibitor group 2
WNT_SIGNALING	Bcl9	PID_BETA_CATENIN_NUC_PATHWAY	http://www.broadinstitute.org/gsea/msigdb/cards/PID_BETA_CATENIN_NUC_PATHWAY	-0.257493	-0.326425	-0.117868	0.193187	0.328135	0.172339	0.256088	-0.170541	-0.252058	Inhibitor group 2
WNT_SIGNALING	Ywhaz	PID_BETA_CATENIN_NUC_PATHWAY	http://www.broadinstitute.org/gsea/msigdb/cards/PID_BETA_CATENIN_NUC_PATHWAY	-0.197499	-0.262317	-0.0943531	0.19743	0.217665	0.131963	0.214644	-0.157559	-0.310291	Inhibitor group 2
WNT_SIGNALING	Sfrp1	KEGG_WNT_SIGNALING_PATHWAY	http://www.broadinstitute.org/gsea/msigdb/cards/KEGG_WNT_SIGNALING_PATHWAY	-0.390328	-0.420995	0.122169	0.440902	0.395373	0.302007	0.343262	-0.292255	-0.539506	Inhibitor group 2
WNT_SIGNALING	Smad2	KEGG_WNT_SIGNALING_PATHWAY	http://www.broadinstitute.org/gsea/msigdb/cards/KEGG_WNT_SIGNALING_PATHWAY	-0.307491	-0.337641	-0.0414071	0.157288	0.313976	0.164407	0.20473	-0.102618	-0.329827	Inhibitor group 2
WNT_SIGNALING	Ppp2cb	KEGG_WNT_SIGNALING_PATHWAY	http://www.broadinstitute.org/gsea/msigdb/cards/KEGG_WNT_SIGNALING_PATHWAY	-0.290601	-0.299956	-0.0351511	0.219881	0.292909	0.17198	0.254398	-0.205419	-0.372421	Inhibitor group 2
WNT_SIGNALING	Tbl1xr1	KEGG_WNT_SIGNALING_PATHWAY	http://www.broadinstitute.org/gsea/msigdb/cards/KEGG_WNT_SIGNALING_PATHWAY	-0.107623	-0.0883844	-0.00577724	0.25793	0.277578	0.11779	0.17458	-0.264197	-0.452107	Inhibitor group 2
WNT_SIGNALING	Ppp3cb	KEGG_WNT_SIGNALING_PATHWAY	http://www.broadinstitute.org/gsea/msigdb/cards/KEGG_WNT_SIGNALING_PATHWAY	-0.101233	-0.0578082	0.173648	0.258369	0.202413	0.151264	0.141206	-0.364002	-0.480931	Inhibitor group 2
WNT_SIGNALING	Wnt5a	KEGG_WNT_SIGNALING_PATHWAY	http://www.broadinstitute.org/gsea/msigdb/cards/KEGG_WNT_SIGNALING_PATHWAY	-0.0625782	0.036248	0.293089	0.365207	0.427046	0.252983	0.298006	-0.732962	-1.17302	Inhibitor group 2
WNT_SIGNALING	Fzd10	KEGG_WNT_SIGNALING_PATHWAY	http://www.broadinstitute.org/gsea/msigdb/cards/KEGG_WNT_SIGNALING_PATHWAY	0.0347121	0.0653435	0.560621	0.466855	0.373601	0.358786	0.257542	-0.800229	-0.839449	Inhibitor group 2
WNT_SIGNALING	Lef1	BIOCARTA_WNT_PATHWAY	http://www.broadinstitute.org/gsea/msigdb/cards/BIOCARTA_WNT_PATHWAY	-0.320804	-0.0264709	0.51147	0.503462	0.459924	0.315224	0.35368	-0.976074	-1.23346	Inhibitor group 2
WNT_SIGNALING	Map3k7	BIOCARTA_WNT_PATHWAY	http://www.broadinstitute.org/gsea/msigdb/cards/BIOCARTA_WNT_PATHWAY	-0.22938	-0.23015	0.00321712	0.221597	0.284958	0.154785	0.216098	-0.154318	-0.459436	Inhibitor group 2
WNT_SIGNALING	Nlk	BIOCARTA_WNT_PATHWAY	http://www.broadinstitute.org/gsea/msigdb/cards/BIOCARTA_WNT_PATHWAY	-0.175198	-0.154158	0.0202799	0.189837	0.259189	0.112723	0.183485	-0.270074	-0.406867	Inhibitor group 2
WNT_SIGNALING	Csnk1d	BIOCARTA_WNT_PATHWAY	http://www.broadinstitute.org/gsea/msigdb/cards/BIOCARTA_WNT_PATHWAY	-0.158867	-0.263103	0.0305964	0.241995	0.303171	0.160036	0.127141	-0.222596	-0.41861	Inhibitor group 2
WNT_SIGNALING	Wif1	BIOCARTA_WNT_PATHWAY	http://www.broadinstitute.org/gsea/msigdb/cards/BIOCARTA_WNT_PATHWAY	0.515584	0.554717	0.679159	0.160845	0.0838463	-0.0303298	-0.123818	-0.953621	-0.995008	Inhibitor group 2
WNT_SIGNALING	Ror2	PID_WNT_NONCANONICAL_PATHWAY	http://www.broadinstitute.org/gsea/msigdb/cards/PID_WNT_NONCANONICAL_PATHWAY	0.150576	0.192189	0.334262	0.169287	0.0116666	0.0756093	0.0198919	-0.396009	-0.57666	Activator group 1
WNT_SIGNALING	Ruvbl2	PID_BETA_CATENIN_NUC_PATHWAY	http://www.broadinstitute.org/gsea/msigdb/cards/PID_BETA_CATENIN_NUC_PATHWAY	0.139681	0.226731	0.152765	0.135875	0.130185	0.0156766	-0.0388089	-0.480868	-0.47121	Activator group 1
WNT_SIGNALING	Incenp	PID_BETA_CATENIN_NUC_PATHWAY	http://www.broadinstitute.org/gsea/msigdb/cards/PID_BETA_CATENIN_NUC_PATHWAY	0.292895	0.220778	0.204379	0.149764	-0.0446229	0.0295234	0.0397299	-0.50556	-0.422403	Activator group 1
WNT_SIGNALING	Ppp2r5e	KEGG_WNT_SIGNALING_PATHWAY	http://www.broadinstitute.org/gsea/msigdb/cards/KEGG_WNT_SIGNALING_PATHWAY	-0.0388385	-0.052922	0.0979686	0.253184	0.222134	0.135525	0.142129	-0.3145	-0.43489	Activator group 1
WNT_SIGNALING	Tcf7	KEGG_WNT_SIGNALING_PATHWAY	http://www.broadinstitute.org/gsea/msigdb/cards/KEGG_WNT_SIGNALING_PATHWAY	0.00845897	-0.0655546	0.109243	0.263679	0.20848	0.159532	0.157065	-0.390078	-0.546467	Activator group 1
WNT_SIGNALING	Ccnd2	KEGG_WNT_SIGNALING_PATHWAY	http://www.broadinstitute.org/gsea/msigdb/cards/KEGG_WNT_SIGNALING_PATHWAY	0.137592	0.163368	0.291516	0.183467	0.155662	0.0805004	0.0146488	-0.504958	-0.415596	Activator group 1
WNT_SIGNALING	Ctbp2	KEGG_WNT_SIGNALING_PATHWAY	http://www.broadinstitute.org/gsea/msigdb/cards/KEGG_WNT_SIGNALING_PATHWAY	0.219139	0.227396	0.191128	0.166534	-0.00859917	0.0304332	-0.0362428	-0.458692	-0.41183	Activator group 1
WNT_SIGNALING	Ruvbl1	KEGG_WNT_SIGNALING_PATHWAY	http://www.broadinstitute.org/gsea/msigdb/cards/KEGG_WNT_SIGNALING_PATHWAY	0.280873	0.396485	0.275029	0.0190306	0.0168924	-0.100755	-0.251908	-0.441992	-0.284563	Activator group 1
WNT_SIGNALING	Fzd2	KEGG_WNT_SIGNALING_PATHWAY	http://www.broadinstitute.org/gsea/msigdb/cards/KEGG_WNT_SIGNALING_PATHWAY	0.291611	0.204676	0.260426	0.123388	0.0466341	0.010794	-0.107026	-0.331926	-0.465668	Activator group 1
WNT_SIGNALING	Hdac1	BIOCARTA_WNT_PATHWAY	http://www.broadinstitute.org/gsea/msigdb/cards/BIOCARTA_WNT_PATHWAY	0.0514539	0.0363479	0.187243	0.157084	0.128605	0.0698665	0.0407696	-0.327645	-0.427049	Activator group 1
WNT_SIGNALING	Ccnd1	BIOCARTA_WNT_PATHWAY	http://www.broadinstitute.org/gsea/msigdb/cards/BIOCARTA_WNT_PATHWAY	0.47099	0.582929	0.612578	0.164957	0.00360259	-0.0552669	-0.144459	-0.922016	-0.682937	Activator group 1
WNT_SIGNALING	Tcf19	KEGG_WNT_SIGNALING_PATHWAY	http://www.broadinstitute.org/gsea/msigdb/cards/KEGG_WNT_SIGNALING_PATHWAY	0.326458	0.330568	0.240022	0.095068	0.050981	-0.0930614	-0.205634	-0.594926	-0.413042	Activator group 1
WNT_SIGNALING	Frzb	WNT_SIGNALING	http://www.broadinstitute.org/gsea/msigdb/cards/WNT_SIGNALING	0.410562	0.426997	-0.0399633	-0.395565	-0.443742	-0.321081	-0.341498	0.176488	0.395897	Activator group 2
WNT_SIGNALING	Wisp1	WNT_SIGNALING	http://www.broadinstitute.org/gsea/msigdb/cards/WNT_SIGNALING	0.430589	0.386033	0.0988298	-0.158406	-0.275909	-0.136798	-0.240526	-0.188143	-0.0842922	Activator group 2
WNT_SIGNALING	Igfbp4	PID_WNT_SIGNALING_PATHWAY	http://www.broadinstitute.org/gsea/msigdb/cards/PID_WNT_SIGNALING_PATHWAY	0.328948	0.367617	0.170799	-0.186021	-0.359648	-0.173745	-0.171967	0.0569137	-0.0112442	Activator group 2
WNT_SIGNALING	Rspo1	PID_WNT_SIGNALING_PATHWAY	http://www.broadinstitute.org/gsea/msigdb/cards/PID_WNT_SIGNALING_PATHWAY	0.529861	0.492531	-0.0557129	-0.366064	-0.417541	-0.301471	-0.374787	0.0952965	0.140168	Activator group 2
WNT_SIGNALING	Pparg	PID_WNT_NONCANONICAL_PATHWAY	http://www.broadinstitute.org/gsea/msigdb/cards/PID_WNT_NONCANONICAL_PATHWAY	0.379941	0.455239	0.16302	-0.165045	-0.427817	-0.216702	-0.300998	-0.021064	0.336974	Activator group 2
WNT_SIGNALING	Cacna1g	PID_BETA_CATENIN_NUC_PATHWAY	http://www.broadinstitute.org/gsea/msigdb/cards/PID_BETA_CATENIN_NUC_PATHWAY	0.458958	0.430041	-0.104043	-0.466119	-0.558793	-0.357596	-0.359555	0.270791	0.256364	Activator group 2
WNT_SIGNALING	Vcan	PID_BETA_CATENIN_NUC_PATHWAY	http://www.broadinstitute.org/gsea/msigdb/cards/PID_BETA_CATENIN_NUC_PATHWAY	0.895497	0.890591	0.508681	-0.224286	-0.680285	-0.507551	-0.552848	-0.28558	-0.270292	Activator group 2
WNT_SIGNALING	Tcf7l2	KEGG_WNT_SIGNALING_PATHWAY	http://www.broadinstitute.org/gsea/msigdb/cards/KEGG_WNT_SIGNALING_PATHWAY	0.294154	0.283925	0.176715	-0.216135	-0.245606	-0.116322	-0.287798	0.236638	0.158792	Activator group 2
WNT_SIGNALING	Daam2	KEGG_WNT_SIGNALING_PATHWAY	http://www.broadinstitute.org/gsea/msigdb/cards/KEGG_WNT_SIGNALING_PATHWAY	0.445368	0.366735	-0.0532274	-0.21513	-0.308429	-0.238721	-0.264278	-0.0866202	0.132825	Activator group 2
WNT_SIGNALING	B2m	WNT_SIGNALING	http://www.broadinstitute.org/gsea/msigdb/cards/WNT_SIGNALING	-0.0320397	0.0159086	-0.282126	-0.249485	-0.296699	-0.0799245	0.0176446	0.412005	0.763628	Activator group 2
WNT_SIGNALING	Fbxw4	WNT_SIGNALING	http://www.broadinstitute.org/gsea/msigdb/cards/WNT_SIGNALING	0.188127	0.166565	0.00777928	-0.203621	-0.255837	-0.137903	-0.185161	0.175847	0.420759	Activator group 2
WNT_SIGNALING	Cfb	ST_WNT_CA2_CYCLIC_GMP_PATHWAY	http://www.broadinstitute.org/gsea/msigdb/cards/ST_WNT_CA2_CYCLIC_GMP_PATHWAY	0.0289686	0.0492941	-0.307499	-0.331674	-0.468234	-0.229535	-0.127516	0.45293	0.827302	Activator group 2
WNT_SIGNALING	Itpr2	ST_WNT_CA2_CYCLIC_GMP_PATHWAY	http://www.broadinstitute.org/gsea/msigdb/cards/ST_WNT_CA2_CYCLIC_GMP_PATHWAY	0.207972	0.137517	-0.0248349	-0.224958	-0.251084	-0.135825	-0.205687	0.205322	0.451222	Activator group 2
WNT_SIGNALING	Dag1	ST_WNT_CA2_CYCLIC_GMP_PATHWAY	http://www.broadinstitute.org/gsea/msigdb/cards/ST_WNT_CA2_CYCLIC_GMP_PATHWAY	0.385361	0.349458	0.136227	-0.156397	-0.316866	-0.132951	-0.265806	0.0659001	0.229724	Activator group 2
WNT_SIGNALING	Lrp1	ST_WNT_BETA_CATENIN_PATHWAY	http://www.broadinstitute.org/gsea/msigdb/cards/ST_WNT_BETA_CATENIN_PATHWAY	-0.00269227	-0.0412607	-0.416701	-0.525215	-0.425099	-0.402755	-0.133405	0.596484	0.837154	Activator group 2
WNT_SIGNALING	Mvp	ST_WNT_BETA_CATENIN_PATHWAY	http://www.broadinstitute.org/gsea/msigdb/cards/ST_WNT_BETA_CATENIN_PATHWAY	0.177819	0.148318	-0.0614441	-0.252153	-0.21638	-0.0996993	-0.171277	0.232889	0.497895	Activator group 2
WNT_SIGNALING	Psmb9	REACTOME_SIGNALING_BY_WNT	http://www.broadinstitute.org/gsea/msigdb/cards/REACTOME_SIGNALING_BY_WNT	0.0383099	0.111078	-0.266579	-0.336255	-0.424593	-0.182642	-0.0934529	0.490668	1.01792	Activator group 2
WNT_SIGNALING	Camk4	PID_BETA_CATENIN_NUC_PATHWAY	http://www.broadinstitute.org/gsea/msigdb/cards/PID_BETA_CATENIN_NUC_PATHWAY	-0.0825067	-0.0934449	-0.0915963	-0.17049	-0.181351	-0.130142	-0.123826	0.490179	0.355884	Activator group 2
WNT_SIGNALING	Ar	PID_BETA_CATENIN_NUC_PATHWAY	http://www.broadinstitute.org/gsea/msigdb/cards/PID_BETA_CATENIN_NUC_PATHWAY	0.154951	0.159126	-0.0206436	-0.211272	-0.295533	-0.134212	-0.238377	0.179526	0.435083	Activator group 2
WNT_SIGNALING	Klf4	PID_BETA_CATENIN_NUC_PATHWAY	http://www.broadinstitute.org/gsea/msigdb/cards/PID_BETA_CATENIN_NUC_PATHWAY	0.159005	0.117437	-0.0321443	-0.210155	-0.289449	-0.0727162	-0.146349	0.26006	0.394826	Activator group 2
WNT_SIGNALING	Pitx2	PID_BETA_CATENIN_NUC_PATHWAY	http://www.broadinstitute.org/gsea/msigdb/cards/PID_BETA_CATENIN_NUC_PATHWAY	0.214738	0.208293	-0.100535	-0.207412	-0.270503	-0.172982	-0.202918	0.128094	0.444894	Activator group 2
WNT_SIGNALING	Xpo1	PID_BETA_CATENIN_NUC_PATHWAY	http://www.broadinstitute.org/gsea/msigdb/cards/PID_BETA_CATENIN_NUC_PATHWAY	0.272323	0.376103	0.0901439	0.00544627	-0.149664	-0.140314	-0.145079	-0.465213	-0.233775	Activator group 2
WNT_SIGNALING	Tcf4	PID_BETA_CATENIN_NUC_PATHWAY	http://www.broadinstitute.org/gsea/msigdb/cards/PID_BETA_CATENIN_NUC_PATHWAY	0.299681	0.193805	-0.165159	-0.285713	-0.314527	-0.229041	-0.233709	0.207074	0.352917	Activator group 2
WNT_SIGNALING	Nfatc2	KEGG_WNT_SIGNALING_PATHWAY	http://www.broadinstitute.org/gsea/msigdb/cards/KEGG_WNT_SIGNALING_PATHWAY	-0.038947	-0.0306583	-0.171651	-0.230426	-0.335878	-0.0435636	-0.125408	0.518252	0.705201	Activator group 2
WNT_SIGNALING	Ccnd3	KEGG_WNT_SIGNALING_PATHWAY	http://www.broadinstitute.org/gsea/msigdb/cards/KEGG_WNT_SIGNALING_PATHWAY	-0.0270223	-0.0947437	-0.238761	-0.340474	-0.335403	-0.192792	-0.0751601	0.510247	0.726707	Activator group 2
WNT_SIGNALING	Sox17	KEGG_WNT_SIGNALING_PATHWAY	http://www.broadinstitute.org/gsea/msigdb/cards/KEGG_WNT_SIGNALING_PATHWAY	0.00560705	-0.0778614	-0.401216	-0.527369	-0.412266	-0.442983	0.0172753	0.70068	0.668454	Activator group 2
WNT_SIGNALING	Wnt2	KEGG_WNT_SIGNALING_PATHWAY	http://www.broadinstitute.org/gsea/msigdb/cards/KEGG_WNT_SIGNALING_PATHWAY	0.109069	0.103052	-0.156653	-0.177196	-0.244354	-0.13709	-0.133345	0.157134	0.554753	Activator group 2
WNT_SIGNALING	Prkacb	KEGG_WNT_SIGNALING_PATHWAY	http://www.broadinstitute.org/gsea/msigdb/cards/KEGG_WNT_SIGNALING_PATHWAY	0.164521	0.159456	-0.0358441	-0.235952	-0.281098	-0.157824	-0.153967	0.17395	0.358928	Activator group 2
WNT_SIGNALING	Ppp3ca	KEGG_WNT_SIGNALING_PATHWAY	http://www.broadinstitute.org/gsea/msigdb/cards/KEGG_WNT_SIGNALING_PATHWAY	0.194889	0.150373	-0.0579229	-0.22333	-0.257188	-0.128627	-0.204843	0.240795	0.466826	Activator group 2
WNT_SIGNALING	Ppp2r5c	KEGG_WNT_SIGNALING_PATHWAY	http://www.broadinstitute.org/gsea/msigdb/cards/KEGG_WNT_SIGNALING_PATHWAY	0.200225	0.114829	-0.0445141	-0.171889	-0.190085	-0.166461	-0.237436	0.210985	0.367936	Activator group 2
WNT_SIGNALING	Csnk2a2	KEGG_WNT_SIGNALING_PATHWAY	http://www.broadinstitute.org/gsea/msigdb/cards/KEGG_WNT_SIGNALING_PATHWAY	0.210928	0.109128	0.0497402	-0.200411	-0.233111	-0.0935214	-0.230387	0.242479	0.327413	Activator group 2
WNT_SIGNALING	Mapk8	KEGG_WNT_SIGNALING_PATHWAY	http://www.broadinstitute.org/gsea/msigdb/cards/KEGG_WNT_SIGNALING_PATHWAY	0.216671	0.166146	-0.0755403	-0.251473	-0.244393	-0.198677	-0.238014	0.169954	0.403134	Activator group 2
WNT_SIGNALING	Sfrp5	KEGG_WNT_SIGNALING_PATHWAY	http://www.broadinstitute.org/gsea/msigdb/cards/KEGG_WNT_SIGNALING_PATHWAY	0.224945	0.148815	-0.125584	-0.224392	-0.230669	-0.114584	-0.255432	0.236312	0.489193	Activator group 2
WNT_SIGNALING	Plcb1	KEGG_WNT_SIGNALING_PATHWAY	http://www.broadinstitute.org/gsea/msigdb/cards/KEGG_WNT_SIGNALING_PATHWAY	0.261424	0.222421	-0.0404352	-0.200847	-0.343638	-0.191168	-0.200609	0.135874	0.327736	Activator group 2
WNT_SIGNALING	Btrc	BIOCARTA_WNT_PATHWAY	http://www.broadinstitute.org/gsea/msigdb/cards/BIOCARTA_WNT_PATHWAY	0.221354	0.141264	-0.169618	-0.270071	-0.308471	-0.174376	-0.135271	0.163823	0.350025	Activator group 2
WNT_SIGNALING	Tcf3	KEGG_WNT_SIGNALING_PATHWAY	http://www.broadinstitute.org/gsea/msigdb/cards/KEGG_WNT_SIGNALING_PATHWAY	0.226888	0.207633	-0.00595763	-0.249502	-0.312408	-0.154668	-0.193291	0.221756	0.289244	Activator group 2
BMP_SIGNALING	Bambi	PID_BMP_PATHWAY	http://www.broadinstitute.org/gsea/msigdb/cards/PID_BMP_PATHWAY	-1.84409	-1.38899	0.198821	1.07363	1.30134	0.977462	1.21274	0.259992	-2.05828	Inhibitor group 1
BMP_SIGNALING	Bmp7	PID_BMP_PATHWAY	http://www.broadinstitute.org/gsea/msigdb/cards/PID_BMP_PATHWAY	-0.769607	-0.807955	-0.444178	0.227674	0.547565	0.198027	0.563265	0.201832	-0.668223	Inhibitor group 1
BMP_SIGNALING	Bmp6	PID_BMP_PATHWAY	http://www.broadinstitute.org/gsea/msigdb/cards/PID_BMP_PATHWAY	-0.566642	-0.619923	-0.301797	0.177097	0.494765	0.123606	0.428075	-0.0760268	-0.376042	Inhibitor group 1
BMP_SIGNALING	Smad7	PID_BMP_PATHWAY	http://www.broadinstitute.org/gsea/msigdb/cards/PID_BMP_PATHWAY	-0.497466	-0.574941	-0.153142	0.314227	0.457965	0.301393	0.4147	-0.0542132	-0.535256	Inhibitor group 1
BMP_SIGNALING	Bmp2	PID_BMP_PATHWAY	http://www.broadinstitute.org/gsea/msigdb/cards/PID_BMP_PATHWAY	-0.362743	-0.426182	-0.0339667	0.13374	0.22999	0.264328	0.268988	0.372266	-0.180922	Inhibitor group 1
BMP_SIGNALING	Bmpr2	PID_BMP_PATHWAY	http://www.broadinstitute.org/gsea/msigdb/cards/PID_BMP_PATHWAY	-0.360803	-0.366374	-0.120201	0.194646	0.34469	0.138629	0.279732	0.075995	-0.42541	Inhibitor group 1
BMP_SIGNALING	Ppm1a	PID_BMP_PATHWAY	http://www.broadinstitute.org/gsea/msigdb/cards/PID_BMP_PATHWAY	-0.322352	-0.368058	-0.159327	0.156971	0.282274	0.144579	0.275789	-0.000291459	-0.374274	Inhibitor group 1
BMP_SIGNALING	Ube2d3	REACTOME_SIGNALING_BY_BMP	http://www.broadinstitute.org/gsea/msigdb/cards/REACTOME_SIGNALING_BY_BMP	-0.31424	-0.318615	-0.188282	0.146453	0.260188	0.155555	0.271138	-0.0896522	-0.201778	Inhibitor group 1
BMP_SIGNALING	Ctdsp2	PID_BMP_PATHWAY	http://www.broadinstitute.org/gsea/msigdb/cards/PID_BMP_PATHWAY	-0.312197	-0.417975	-0.0829562	0.283788	0.313215	0.232173	0.282448	-0.107814	-0.230863	Inhibitor group 1
BMP_SIGNALING	Bmpr1a	PID_BMP_PATHWAY	http://www.broadinstitute.org/gsea/msigdb/cards/PID_BMP_PATHWAY	-0.306336	-0.331609	-0.110554	0.183908	0.308549	0.147325	0.256659	-0.0913802	-0.536445	Inhibitor group 1
BMP_SIGNALING	Skil	REACTOME_DOWNREGULATION_OF_SMAD2_3_SMAD4_TRANSCRIPTIONAL_ACTIVITY	http://www.broadinstitute.org/gsea/msigdb/cards/REACTOME_DOWNREGULATION_OF_SMAD2_3_SMAD4_TRANSCRIPTIONAL_ACTIVITY	-0.280286	-0.284004	-0.149418	0.141113	0.247082	0.103289	0.253497	0.0540576	-0.341441	Inhibitor group 1
BMP_SIGNALING	Bmp4	PID_BMP_PATHWAY	http://www.broadinstitute.org/gsea/msigdb/cards/PID_BMP_PATHWAY	-0.247376	-0.334152	-0.0552321	0.208985	0.175343	0.157985	0.258108	0.0630489	-0.344279	Inhibitor group 1
BMP_SIGNALING	Bmpr1b	PID_BMP_PATHWAY	http://www.broadinstitute.org/gsea/msigdb/cards/PID_BMP_PATHWAY	-0.215641	-0.294751	-0.304488	-0.0371012	0.212378	0.11767	0.203825	0.393843	-0.116786	Inhibitor group 1
BMP_SIGNALING	Bmp2k	PID_BMP_PATHWAY	http://www.broadinstitute.org/gsea/msigdb/cards/PID_BMP_PATHWAY	-0.408532	-0.412139	0.108752	0.388965	0.43673	0.350284	0.364893	-0.115452	-0.645354	Inhibitor group 1
BMP_SIGNALING	Msx1	REACTOME_DOWNREGULATION_OF_SMAD2_3_SMAD4_TRANSCRIPTIONAL_ACTIVITY	http://www.broadinstitute.org/gsea/msigdb/cards/REACTOME_DOWNREGULATION_OF_SMAD2_3_SMAD4_TRANSCRIPTIONAL_ACTIVITY	-0.130007	-0.0781379	0.11128	0.209767	0.279461	0.0772631	0.133264	-0.361643	-0.461175	Inhibitor group 2
BMP_SIGNALING	Msx2	REACTOME_DOWNREGULATION_OF_SMAD2_3_SMAD4_TRANSCRIPTIONAL_ACTIVITY	http://www.broadinstitute.org/gsea/msigdb/cards/REACTOME_DOWNREGULATION_OF_SMAD2_3_SMAD4_TRANSCRIPTIONAL_ACTIVITY	-0.77304	-0.281255	0.661784	0.888575	0.998903	0.745462	0.848799	-0.318703	-2.40687	Inhibitor group 2
BMP_SIGNALING	Smad2	REACTOME_DOWNREGULATION_OF_SMAD2_3_SMAD4_TRANSCRIPTIONAL_ACTIVITY	http://www.broadinstitute.org/gsea/msigdb/cards/REACTOME_DOWNREGULATION_OF_SMAD2_3_SMAD4_TRANSCRIPTIONAL_ACTIVITY	-0.307491	-0.337641	-0.0414071	0.157288	0.313976	0.164407	0.20473	-0.102618	-0.329827	Inhibitor group 2
BMP_SIGNALING	Smad5	PID_BMP_PATHWAY	http://www.broadinstitute.org/gsea/msigdb/cards/PID_BMP_PATHWAY	-0.287326	-0.337237	0.0448898	0.298385	0.332332	0.186127	0.299016	-0.258725	-0.518892	Inhibitor group 2
BMP_SIGNALING	Map3k7	PID_BMP_PATHWAY	http://www.broadinstitute.org/gsea/msigdb/cards/PID_BMP_PATHWAY	-0.22938	-0.23015	0.00321712	0.221597	0.284958	0.154785	0.216098	-0.154318	-0.459436	Inhibitor group 2
BMP_SIGNALING	Hdac1	REACTOME_DOWNREGULATION_OF_SMAD2_3_SMAD4_TRANSCRIPTIONAL_ACTIVITY	http://www.broadinstitute.org/gsea/msigdb/cards/REACTOME_DOWNREGULATION_OF_SMAD2_3_SMAD4_TRANSCRIPTIONAL_ACTIVITY	0.0514539	0.0363479	0.187243	0.157084	0.128605	0.0698665	0.0407696	-0.327645	-0.427049	Activator group 1
BMP_SIGNALING	Tgif2	REACTOME_DOWNREGULATION_OF_SMAD2_3_SMAD4_TRANSCRIPTIONAL_ACTIVITY	http://www.broadinstitute.org/gsea/msigdb/cards/REACTOME_DOWNREGULATION_OF_SMAD2_3_SMAD4_TRANSCRIPTIONAL_ACTIVITY	0.212174	0.217068	0.255217	0.18414	0.0606344	-0.023461	0.0683904	-0.491375	-0.620718	Activator group 1
BMP_SIGNALING	Parp1	REACTOME_DOWNREGULATION_OF_SMAD2_3_SMAD4_TRANSCRIPTIONAL_ACTIVITY	http://www.broadinstitute.org/gsea/msigdb/cards/REACTOME_DOWNREGULATION_OF_SMAD2_3_SMAD4_TRANSCRIPTIONAL_ACTIVITY	0.397592	0.381525	0.299347	-0.0941108	-0.133748	-0.143959	-0.240844	-0.193883	-0.0781616	Activator group 1
BMP_SIGNALING	Sostdc1	PID_BMP_PATHWAY	http://www.broadinstitute.org/gsea/msigdb/cards/PID_BMP_PATHWAY	0.44898	0.406603	0.160775	-0.192175	-0.255538	-0.221753	-0.323526	-0.0365393	0.00031939	Activator group 2
BMP_SIGNALING	Fst	PID_BMP_PATHWAY	http://www.broadinstitute.org/gsea/msigdb/cards/PID_BMP_PATHWAY	0.165062	0.195044	0.108248	-0.227722	-0.250364	-0.129841	-0.219266	0.259298	0.410398	Activator group 2
BMP_SIGNALING	Ski	PID_BMP_PATHWAY	http://www.broadinstitute.org/gsea/msigdb/cards/PID_BMP_PATHWAY	0.195262	0.15986	-0.0930052	-0.249358	-0.30164	-0.131305	-0.176985	0.146361	0.298453	Activator group 2
BMP_SIGNALING	Ube2d1	REACTOME_SIGNALING_BY_BMP	http://www.broadinstitute.org/gsea/msigdb/cards/REACTOME_SIGNALING_BY_BMP	0.196514	0.17484	-0.00190663	-0.217183	-0.255903	-0.131843	-0.243065	0.203241	0.499174	Activator group 2
BMP_SIGNALING	Ctdsp1	PID_BMP_PATHWAY	http://www.broadinstitute.org/gsea/msigdb/cards/PID_BMP_PATHWAY	0.200139	0.149186	-0.0921547	-0.224189	-0.247588	-0.139234	-0.216602	0.169194	0.366064	Activator group 2
BMP_SIGNALING	Ncor2	REACTOME_DOWNREGULATION_OF_SMAD2_3_SMAD4_TRANSCRIPTIONAL_ACTIVITY	http://www.broadinstitute.org/gsea/msigdb/cards/REACTOME_DOWNREGULATION_OF_SMAD2_3_SMAD4_TRANSCRIPTIONAL_ACTIVITY	0.250266	0.145915	-0.119043	-0.221226	-0.258947	-0.112775	-0.142661	0.212338	0.295257	Activator group 2
TGFb_SIGNALING	Bmp7	KEGG_TGF_BETA_SIGNALING_PATHWAY	http://www.broadinstitute.org/gsea/msigdb/cards/KEGG_TGF_BETA_SIGNALING_PATHWAY	-0.769607	-0.807955	-0.444178	0.227674	0.547565	0.198027	0.563265	0.201832	-0.668223	Inhibitor group 1
TGFb_SIGNALING	Bmp8a	KEGG_TGF_BETA_SIGNALING_PATHWAY	http://www.broadinstitute.org/gsea/msigdb/cards/KEGG_TGF_BETA_SIGNALING_PATHWAY	-0.677136	-0.557284	0.214309	0.504693	0.515456	0.431407	0.482907	-0.139065	-0.752264	Inhibitor group 1
TGFb_SIGNALING	Bmp6	KEGG_TGF_BETA_SIGNALING_PATHWAY	http://www.broadinstitute.org/gsea/msigdb/cards/KEGG_TGF_BETA_SIGNALING_PATHWAY	-0.566642	-0.619923	-0.301797	0.177097	0.494765	0.123606	0.428075	-0.0760268	-0.376042	Inhibitor group 1
TGFb_SIGNALING	Ppp2r1b	KEGG_TGF_BETA_SIGNALING_PATHWAY	http://www.broadinstitute.org/gsea/msigdb/cards/KEGG_TGF_BETA_SIGNALING_PATHWAY	-0.523464	-0.416736	0.157859	0.415183	0.490149	0.383766	0.356622	-0.224291	-0.641461	Inhibitor group 1
TGFb_SIGNALING	Smad7	KEGG_TGF_BETA_SIGNALING_PATHWAY	http://www.broadinstitute.org/gsea/msigdb/cards/KEGG_TGF_BETA_SIGNALING_PATHWAY	-0.497466	-0.574941	-0.153142	0.314227	0.457965	0.301393	0.4147	-0.0542132	-0.535256	Inhibitor group 1
TGFb_SIGNALING	Bmp2	KEGG_TGF_BETA_SIGNALING_PATHWAY	http://www.broadinstitute.org/gsea/msigdb/cards/KEGG_TGF_BETA_SIGNALING_PATHWAY	-0.362743	-0.426182	-0.0339667	0.13374	0.22999	0.264328	0.268988	0.372266	-0.180922	Inhibitor group 1
TGFb_SIGNALING	Bmpr2	KEGG_TGF_BETA_SIGNALING_PATHWAY	http://www.broadinstitute.org/gsea/msigdb/cards/KEGG_TGF_BETA_SIGNALING_PATHWAY	-0.360803	-0.366374	-0.120201	0.194646	0.34469	0.138629	0.279732	0.075995	-0.42541	Inhibitor group 1
TGFb_SIGNALING	Cdkn2b	KEGG_TGF_BETA_SIGNALING_PATHWAY	http://www.broadinstitute.org/gsea/msigdb/cards/KEGG_TGF_BETA_SIGNALING_PATHWAY	-0.355844	-0.3867	-0.149831	0.131707	0.179065	0.218504	0.333525	0.301432	-0.174312	Inhibitor group 1
TGFb_SIGNALING	Bmpr1a	KEGG_TGF_BETA_SIGNALING_PATHWAY	http://www.broadinstitute.org/gsea/msigdb/cards/KEGG_TGF_BETA_SIGNALING_PATHWAY	-0.306336	-0.331609	-0.110554	0.183908	0.308549	0.147325	0.256659	-0.0913802	-0.536445	Inhibitor group 1
TGFb_SIGNALING	Inhbb	KEGG_TGF_BETA_SIGNALING_PATHWAY	http://www.broadinstitute.org/gsea/msigdb/cards/KEGG_TGF_BETA_SIGNALING_PATHWAY	-0.298509	-0.401606	-0.141059	0.0380624	0.0645149	0.250426	0.308458	0.695425	-0.296179	Inhibitor group 1
TGFb_SIGNALING	Id4	KEGG_TGF_BETA_SIGNALING_PATHWAY	http://www.broadinstitute.org/gsea/msigdb/cards/KEGG_TGF_BETA_SIGNALING_PATHWAY	-0.286715	-0.313974	-0.044196	0.158841	0.258758	0.216442	0.236555	0.170039	-0.438536	Inhibitor group 1
TGFb_SIGNALING	Rbx1	KEGG_TGF_BETA_SIGNALING_PATHWAY	http://www.broadinstitute.org/gsea/msigdb/cards/KEGG_TGF_BETA_SIGNALING_PATHWAY	-0.279412	-0.371739	-0.0514845	0.108654	0.275682	0.117963	0.309608	-0.186419	-0.109237	Inhibitor group 1
TGFb_SIGNALING	Bmp4	KEGG_TGF_BETA_SIGNALING_PATHWAY	http://www.broadinstitute.org/gsea/msigdb/cards/KEGG_TGF_BETA_SIGNALING_PATHWAY	-0.247376	-0.334152	-0.0552321	0.208985	0.175343	0.157985	0.258108	0.0630489	-0.344279	Inhibitor group 1
TGFb_SIGNALING	Bmpr1b	KEGG_TGF_BETA_SIGNALING_PATHWAY	http://www.broadinstitute.org/gsea/msigdb/cards/KEGG_TGF_BETA_SIGNALING_PATHWAY	-0.215641	-0.294751	-0.304488	-0.0371012	0.212378	0.11767	0.203825	0.393843	-0.116786	Inhibitor group 1
TGFb_SIGNALING	Rps6kb2	KEGG_TGF_BETA_SIGNALING_PATHWAY	http://www.broadinstitute.org/gsea/msigdb/cards/KEGG_TGF_BETA_SIGNALING_PATHWAY	-0.310231	-0.325379	-0.038096	0.223792	0.258554	0.196274	0.288204	-0.129348	-0.332834	Inhibitor group 2
TGFb_SIGNALING	Smad2	KEGG_TGF_BETA_SIGNALING_PATHWAY	http://www.broadinstitute.org/gsea/msigdb/cards/KEGG_TGF_BETA_SIGNALING_PATHWAY	-0.307491	-0.337641	-0.0414071	0.157288	0.313976	0.164407	0.20473	-0.102618	-0.329827	Inhibitor group 2
TGFb_SIGNALING	Ppp2cb	KEGG_TGF_BETA_SIGNALING_PATHWAY	http://www.broadinstitute.org/gsea/msigdb/cards/KEGG_TGF_BETA_SIGNALING_PATHWAY	-0.290601	-0.299956	-0.0351511	0.219881	0.292909	0.17198	0.254398	-0.205419	-0.372421	Inhibitor group 2
TGFb_SIGNALING	Smad5	KEGG_TGF_BETA_SIGNALING_PATHWAY	http://www.broadinstitute.org/gsea/msigdb/cards/KEGG_TGF_BETA_SIGNALING_PATHWAY	-0.287326	-0.337237	0.0448898	0.298385	0.332332	0.186127	0.299016	-0.258725	-0.518892	Inhibitor group 2
TGFb_SIGNALING	Id1	KEGG_TGF_BETA_SIGNALING_PATHWAY	http://www.broadinstitute.org/gsea/msigdb/cards/KEGG_TGF_BETA_SIGNALING_PATHWAY	-0.205383	-0.165067	0.213087	0.208603	0.201021	0.140603	0.108531	-0.170712	-0.380613	Inhibitor group 2
TGFb_SIGNALING	Id3	KEGG_TGF_BETA_SIGNALING_PATHWAY	http://www.broadinstitute.org/gsea/msigdb/cards/KEGG_TGF_BETA_SIGNALING_PATHWAY	-0.0843414	0.0893411	0.34856	0.158304	0.043177	-0.0183495	-0.0274261	-0.296312	-0.250673	Activator group 1
TGFb_SIGNALING	Rbl1	KEGG_TGF_BETA_SIGNALING_PATHWAY	http://www.broadinstitute.org/gsea/msigdb/cards/KEGG_TGF_BETA_SIGNALING_PATHWAY	0.256308	0.408236	0.293274	0.0300421	-0.0732123	-0.114797	-0.116671	-0.527832	-0.328578	Activator group 1
TGFb_SIGNALING	Tgfb3	KEGG_TGF_BETA_SIGNALING_PATHWAY	http://www.broadinstitute.org/gsea/msigdb/cards/KEGG_TGF_BETA_SIGNALING_PATHWAY	0.432666	0.418155	-0.0806011	-0.452553	-0.517891	-0.355112	-0.408079	0.270183	0.397477	Activator group 2
TGFb_SIGNALING	Dcn	KEGG_TGF_BETA_SIGNALING_PATHWAY	http://www.broadinstitute.org/gsea/msigdb/cards/KEGG_TGF_BETA_SIGNALING_PATHWAY	0.146515	0.153703	-0.0687836	-0.24353	-0.354631	-0.162561	-0.211681	0.200354	0.476126	Activator group 2
TGFb_SIGNALING	Fst	KEGG_TGF_BETA_SIGNALING_PATHWAY	http://www.broadinstitute.org/gsea/msigdb/cards/KEGG_TGF_BETA_SIGNALING_PATHWAY	0.165062	0.195044	0.108248	-0.227722	-0.250364	-0.129841	-0.219266	0.259298	0.410398	Activator group 2
TGFb_SIGNALING	Pitx2	KEGG_TGF_BETA_SIGNALING_PATHWAY	http://www.broadinstitute.org/gsea/msigdb/cards/KEGG_TGF_BETA_SIGNALING_PATHWAY	0.214738	0.208293	-0.100535	-0.207412	-0.270503	-0.172982	-0.202918	0.128094	0.444894	Activator group 2
TGFb_SIGNALING	Amhr2	KEGG_TGF_BETA_SIGNALING_PATHWAY	http://www.broadinstitute.org/gsea/msigdb/cards/KEGG_TGF_BETA_SIGNALING_PATHWAY	0.217579	0.194567	-0.0166726	-0.204718	-0.240075	-0.15265	-0.231917	0.152298	0.400261	Activator group 2
TGFb_SIGNALING	Lefty1	KEGG_TGF_BETA_SIGNALING_PATHWAY	http://www.broadinstitute.org/gsea/msigdb/cards/KEGG_TGF_BETA_SIGNALING_PATHWAY	0.227106	0.217538	0.184993	-0.157949	-0.276118	-0.138546	-0.259641	0.0325774	0.429285	Activator group 2
VEGF_SIGNALING	Pla2g2e	KEGG_VEGF_SIGNALING_PATHWAY	http://www.broadinstitute.org/gsea/msigdb/cards/KEGG_VEGF_SIGNALING_PATHWAY	-1.55928	-1.29452	-0.236504	0.831533	1.09263	0.810806	1.01928	-0.176309	-1.28307	Inhibitor group 1
VEGF_SIGNALING	Pla2g4b	KEGG_VEGF_SIGNALING_PATHWAY	http://www.broadinstitute.org/gsea/msigdb/cards/KEGG_VEGF_SIGNALING_PATHWAY	-0.914193	-0.777503	-0.14716	0.620446	0.738997	0.543477	0.673205	-0.372828	-0.945655	Inhibitor group 1
VEGF_SIGNALING	Pik3r3	KEGG_VEGF_SIGNALING_PATHWAY	http://www.broadinstitute.org/gsea/msigdb/cards/KEGG_VEGF_SIGNALING_PATHWAY	-0.817152	-0.686218	-0.107736	0.542371	0.681762	0.537269	0.666896	-0.348242	-1.06631	Inhibitor group 1
VEGF_SIGNALING	Mapk13	KEGG_VEGF_SIGNALING_PATHWAY	http://www.broadinstitute.org/gsea/msigdb/cards/KEGG_VEGF_SIGNALING_PATHWAY	-0.601368	-0.6192	-0.275513	0.210074	0.452889	0.226746	0.459958	0.175443	-0.389379	Inhibitor group 1
VEGF_SIGNALING	Pla2g2f	KEGG_VEGF_SIGNALING_PATHWAY	http://www.broadinstitute.org/gsea/msigdb/cards/KEGG_VEGF_SIGNALING_PATHWAY	-0.556987	-0.694031	-0.284428	0.22005	0.44242	0.250033	0.403835	0.159911	-0.288664	Inhibitor group 1
VEGF_SIGNALING	Prkca	KEGG_VEGF_SIGNALING_PATHWAY	http://www.broadinstitute.org/gsea/msigdb/cards/KEGG_VEGF_SIGNALING_PATHWAY	-0.34482	-0.375976	-0.192424	0.165324	0.324681	0.166855	0.281874	0.0356052	-0.412451	Inhibitor group 1
VEGF_SIGNALING	Pik3cb	KEGG_VEGF_SIGNALING_PATHWAY	http://www.broadinstitute.org/gsea/msigdb/cards/KEGG_VEGF_SIGNALING_PATHWAY	-0.317674	-0.424471	-0.167787	0.123173	0.287511	0.163198	0.257671	0.0668738	-0.241272	Inhibitor group 1
VEGF_SIGNALING	Hspb1	KEGG_VEGF_SIGNALING_PATHWAY	http://www.broadinstitute.org/gsea/msigdb/cards/KEGG_VEGF_SIGNALING_PATHWAY	-0.302777	-0.350723	-0.20038	0.153025	0.17827	0.180636	0.24924	0.095127	-0.0406107	Inhibitor group 1
VEGF_SIGNALING	Kras	KEGG_VEGF_SIGNALING_PATHWAY	http://www.broadinstitute.org/gsea/msigdb/cards/KEGG_VEGF_SIGNALING_PATHWAY	-0.263521	-0.281666	-0.189418	0.0896606	0.150046	0.137495	0.190805	0.225166	-0.319009	Inhibitor group 1
VEGF_SIGNALING	Pla2g3	KEGG_VEGF_SIGNALING_PATHWAY	http://www.broadinstitute.org/gsea/msigdb/cards/KEGG_VEGF_SIGNALING_PATHWAY	-0.257843	-0.337481	-0.198374	0.0667628	0.158104	0.164259	0.272077	0.0915022	-0.082155	Inhibitor group 1
VEGF_SIGNALING	Pxn	KEGG_VEGF_SIGNALING_PATHWAY	http://www.broadinstitute.org/gsea/msigdb/cards/KEGG_VEGF_SIGNALING_PATHWAY	-0.226154	-0.308513	0.0166114	0.268824	0.257836	0.180716	0.234513	-0.182728	-0.308243	Inhibitor group 2
VEGF_SIGNALING	Nras	KEGG_VEGF_SIGNALING_PATHWAY	http://www.broadinstitute.org/gsea/msigdb/cards/KEGG_VEGF_SIGNALING_PATHWAY	-0.223311	-0.281276	-0.054994	0.232718	0.194601	0.159997	0.232915	-0.122827	-0.218252	Inhibitor group 2
VEGF_SIGNALING	Ppp3cb	KEGG_VEGF_SIGNALING_PATHWAY	http://www.broadinstitute.org/gsea/msigdb/cards/KEGG_VEGF_SIGNALING_PATHWAY	-0.101233	-0.0578082	0.173648	0.258369	0.202413	0.151264	0.141206	-0.364002	-0.480931	Inhibitor group 2
VEGF_SIGNALING	Kdr	KEGG_VEGF_SIGNALING_PATHWAY	http://www.broadinstitute.org/gsea/msigdb/cards/KEGG_VEGF_SIGNALING_PATHWAY	0.376538	0.325878	-0.0121386	-0.167868	-0.366499	-0.18796	-0.18967	-0.174807	0.220337	Activator group 2
VEGF_SIGNALING	Mapk12	KEGG_VEGF_SIGNALING_PATHWAY	http://www.broadinstitute.org/gsea/msigdb/cards/KEGG_VEGF_SIGNALING_PATHWAY	-0.0808737	-0.0455388	-0.231397	-0.249723	-0.0642067	-0.108905	-0.0397026	0.212454	0.466674	Activator group 2
VEGF_SIGNALING	Nfatc2	KEGG_VEGF_SIGNALING_PATHWAY	http://www.broadinstitute.org/gsea/msigdb/cards/KEGG_VEGF_SIGNALING_PATHWAY	-0.038947	-0.0306583	-0.171651	-0.230426	-0.335878	-0.0435636	-0.125408	0.518252	0.705201	Activator group 2
VEGF_SIGNALING	Pik3r1	KEGG_VEGF_SIGNALING_PATHWAY	http://www.broadinstitute.org/gsea/msigdb/cards/KEGG_VEGF_SIGNALING_PATHWAY	0.0848549	0.0258837	-0.317993	-0.309755	-0.51459	-0.160877	-0.100542	0.484052	0.746035	Activator group 2
VEGF_SIGNALING	Plcg2	KEGG_VEGF_SIGNALING_PATHWAY	http://www.broadinstitute.org/gsea/msigdb/cards/KEGG_VEGF_SIGNALING_PATHWAY	0.13164	0.116818	-0.153475	-0.224757	-0.250309	-0.0863615	-0.166669	0.249765	0.464943	Activator group 2
VEGF_SIGNALING	Pik3cd	KEGG_VEGF_SIGNALING_PATHWAY	http://www.broadinstitute.org/gsea/msigdb/cards/KEGG_VEGF_SIGNALING_PATHWAY	0.16232	0.107753	-0.0724372	-0.214298	-0.311331	-0.160465	-0.200451	0.217447	0.487834	Activator group 2
VEGF_SIGNALING	Pik3cg	KEGG_VEGF_SIGNALING_PATHWAY	http://www.broadinstitute.org/gsea/msigdb/cards/KEGG_VEGF_SIGNALING_PATHWAY	0.163267	0.144036	-0.0884607	-0.213511	-0.263708	-0.171107	-0.186916	0.218907	0.454804	Activator group 2
VEGF_SIGNALING	Pik3r5	KEGG_VEGF_SIGNALING_PATHWAY	http://www.broadinstitute.org/gsea/msigdb/cards/KEGG_VEGF_SIGNALING_PATHWAY	0.175969	0.0975913	-0.117024	-0.227255	-0.261116	-0.146953	-0.142735	0.252242	0.480605	Activator group 2
VEGF_SIGNALING	Pik3ca	KEGG_VEGF_SIGNALING_PATHWAY	http://www.broadinstitute.org/gsea/msigdb/cards/KEGG_VEGF_SIGNALING_PATHWAY	0.18278	0.179972	0.036843	-0.186658	-0.261589	-0.173122	-0.201224	0.252587	0.381506	Activator group 2
VEGF_SIGNALING	Ppp3ca	KEGG_VEGF_SIGNALING_PATHWAY	http://www.broadinstitute.org/gsea/msigdb/cards/KEGG_VEGF_SIGNALING_PATHWAY	0.194889	0.150373	-0.0579229	-0.22333	-0.257188	-0.128627	-0.204843	0.240795	0.466826	Activator group 2
VEGF_SIGNALING	Nos3	KEGG_VEGF_SIGNALING_PATHWAY	http://www.broadinstitute.org/gsea/msigdb/cards/KEGG_VEGF_SIGNALING_PATHWAY	0.292563	0.240479	-0.11244	-0.202245	-0.240026	-0.169265	-0.246154	0.139216	0.344605	Activator group 2
VEGF_SIGNALING	Pla2g12a	KEGG_VEGF_SIGNALING_PATHWAY	http://www.broadinstitute.org/gsea/msigdb/cards/KEGG_VEGF_SIGNALING_PATHWAY	0.378801	0.334954	0.14092	-0.13377	-0.180412	-0.20669	-0.26982	-0.032923	0.254997	Activator group 2
FGF_SIGNALING	Fgf22	REACTOME_DOWNSTREAM_SIGNALING_OF_ACTIVATED_FGFR	http://www.broadinstitute.org/gsea/msigdb/cards/REACTOME_DOWNSTREAM_SIGNALING_OF_ACTIVATED_FGFR	-1.28522	-1.12002	-0.191816	0.625055	0.882619	0.589879	0.837807	0.186096	-1.10172	Inhibitor group 1
FGF_SIGNALING	Braf	REACTOME_SIGNALING_BY_FGFR_IN_DISEASE	http://www.broadinstitute.org/gsea/msigdb/cards/REACTOME_SIGNALING_BY_FGFR_IN_DISEASE	-0.729185	-0.780609	-0.12149	0.514044	0.623709	0.38986	0.545356	-0.249264	-0.776351	Inhibitor group 1
FGF_SIGNALING	Fgf5	REACTOME_DOWNSTREAM_SIGNALING_OF_ACTIVATED_FGFR	http://www.broadinstitute.org/gsea/msigdb/cards/REACTOME_DOWNSTREAM_SIGNALING_OF_ACTIVATED_FGFR	-0.622905	-0.645169	-0.296573	0.312247	0.5341	0.354734	0.564785	-0.246519	-0.538905	Inhibitor group 1
FGF_SIGNALING	Mknk1	REACTOME_SIGNALING_BY_FGFR_IN_DISEASE	http://www.broadinstitute.org/gsea/msigdb/cards/REACTOME_SIGNALING_BY_FGFR_IN_DISEASE	-0.567034	-0.579647	-0.357564	0.185804	0.382786	0.15994	0.386491	0.037843	-0.180537	Inhibitor group 1
FGF_SIGNALING	Cdkn1a	REACTOME_DOWNSTREAM_SIGNALING_OF_ACTIVATED_FGFR	http://www.broadinstitute.org/gsea/msigdb/cards/REACTOME_DOWNSTREAM_SIGNALING_OF_ACTIVATED_FGFR	-0.551357	-0.570648	0.104189	0.531824	0.561322	0.514714	0.478992	-0.155283	-0.627168	Inhibitor group 1
FGF_SIGNALING	Adcy1	REACTOME_DOWNSTREAM_SIGNALING_OF_ACTIVATED_FGFR	http://www.broadinstitute.org/gsea/msigdb/cards/REACTOME_DOWNSTREAM_SIGNALING_OF_ACTIVATED_FGFR	-0.506372	-0.619432	-0.325518	0.205394	0.549246	0.150792	0.46953	-0.320252	-0.368285	Inhibitor group 1
FGF_SIGNALING	Them4	REACTOME_DOWNSTREAM_SIGNALING_OF_ACTIVATED_FGFR	http://www.broadinstitute.org/gsea/msigdb/cards/REACTOME_DOWNSTREAM_SIGNALING_OF_ACTIVATED_FGFR	-0.471474	-0.374826	0.260435	0.373003	0.391908	0.271252	0.348434	-0.144223	-0.590253	Inhibitor group 1
FGF_SIGNALING	Fgfr3	PID_FGF_PATHWAY	http://www.broadinstitute.org/gsea/msigdb/cards/PID_FGF_PATHWAY	-0.423801	-0.536935	-0.00221012	0.494723	0.539309	0.460879	0.528437	-0.37859	-0.827102	Inhibitor group 1
FGF_SIGNALING	Prkca	REACTOME_DOWNSTREAM_SIGNALING_OF_ACTIVATED_FGFR	http://www.broadinstitute.org/gsea/msigdb/cards/REACTOME_DOWNSTREAM_SIGNALING_OF_ACTIVATED_FGFR	-0.34482	-0.375976	-0.192424	0.165324	0.324681	0.166855	0.281874	0.0356052	-0.412451	Inhibitor group 1
FGF_SIGNALING	Gab1	PID_FGF_PATHWAY	http://www.broadinstitute.org/gsea/msigdb/cards/PID_FGF_PATHWAY	-0.304597	-0.317722	-0.061825	0.131415	0.223882	0.178636	0.215519	0.0902588	-0.234717	Inhibitor group 1
FGF_SIGNALING	Jun	PID_FGF_PATHWAY	http://www.broadinstitute.org/gsea/msigdb/cards/PID_FGF_PATHWAY	-0.274192	-0.366152	-0.0617309	0.134447	0.200331	0.243181	0.262748	0.264084	-0.103425	Inhibitor group 1
FGF_SIGNALING	Kras	REACTOME_DOWNSTREAM_SIGNALING_OF_ACTIVATED_FGFR	http://www.broadinstitute.org/gsea/msigdb/cards/REACTOME_DOWNSTREAM_SIGNALING_OF_ACTIVATED_FGFR	-0.263521	-0.281666	-0.189418	0.0896606	0.150046	0.137495	0.190805	0.225166	-0.319009	Inhibitor group 1
FGF_SIGNALING	Rps6kb2	REACTOME_DOWNSTREAM_SIGNALING_OF_ACTIVATED_FGFR	http://www.broadinstitute.org/gsea/msigdb/cards/REACTOME_DOWNSTREAM_SIGNALING_OF_ACTIVATED_FGFR	-0.310231	-0.325379	-0.038096	0.223792	0.258554	0.196274	0.288204	-0.129348	-0.332834	Inhibitor group 2
FGF_SIGNALING	Bcr	REACTOME_SIGNALING_BY_FGFR_IN_DISEASE	http://www.broadinstitute.org/gsea/msigdb/cards/REACTOME_SIGNALING_BY_FGFR_IN_DISEASE	-0.296986	-0.319743	0.00516195	0.194316	0.284879	0.275035	0.298307	-0.0758803	-0.269143	Inhibitor group 2
FGF_SIGNALING	Ppp2cb	REACTOME_SIGNALING_BY_FGFR_IN_DISEASE	http://www.broadinstitute.org/gsea/msigdb/cards/REACTOME_SIGNALING_BY_FGFR_IN_DISEASE	-0.290601	-0.299956	-0.0351511	0.219881	0.292909	0.17198	0.254398	-0.205419	-0.372421	Inhibitor group 2
FGF_SIGNALING	Prkce	REACTOME_DOWNSTREAM_SIGNALING_OF_ACTIVATED_FGFR	http://www.broadinstitute.org/gsea/msigdb/cards/REACTOME_DOWNSTREAM_SIGNALING_OF_ACTIVATED_FGFR	-0.279727	-0.346439	-0.0794991	0.198517	0.285492	0.157671	0.24518	-0.0891768	-0.150758	Inhibitor group 2
FGF_SIGNALING	Nras	REACTOME_DOWNSTREAM_SIGNALING_OF_ACTIVATED_FGFR	http://www.broadinstitute.org/gsea/msigdb/cards/REACTOME_DOWNSTREAM_SIGNALING_OF_ACTIVATED_FGFR	-0.223311	-0.281276	-0.054994	0.232718	0.194601	0.159997	0.232915	-0.122827	-0.218252	Inhibitor group 2
FGF_SIGNALING	Fgfr1op	REACTOME_SIGNALING_BY_FGFR_IN_DISEASE	http://www.broadinstitute.org/gsea/msigdb/cards/REACTOME_SIGNALING_BY_FGFR_IN_DISEASE	0.0389186	0.06728	0.164253	0.200113	0.173703	0.0266307	0.0635515	-0.449176	-0.453799	Activator group 1
FGF_SIGNALING	Cpsf6	REACTOME_SIGNALING_BY_FGFR_IN_DISEASE	http://www.broadinstitute.org/gsea/msigdb/cards/REACTOME_SIGNALING_BY_FGFR_IN_DISEASE	0.386936	0.392502	0.189302	-0.000804038	-0.0563348	-0.191852	-0.137926	-0.406041	-0.508641	Activator group 1
FGF_SIGNALING	Ncam1	PID_FGF_PATHWAY	http://www.broadinstitute.org/gsea/msigdb/cards/PID_FGF_PATHWAY	0.376807	0.42314	0.354688	-0.0243521	-0.151438	-0.127906	-0.152021	-0.301721	-0.320017	Activator group 1
FGF_SIGNALING	Klb	PID_FGF_PATHWAY	http://www.broadinstitute.org/gsea/msigdb/cards/PID_FGF_PATHWAY	0.419833	0.484443	0.187921	-0.0146965	-0.0674633	-0.151941	-0.244202	-0.323321	-0.229656	Activator group 1
FGF_SIGNALING	Camk4	REACTOME_DOWNSTREAM_SIGNALING_OF_ACTIVATED_FGFR	http://www.broadinstitute.org/gsea/msigdb/cards/REACTOME_DOWNSTREAM_SIGNALING_OF_ACTIVATED_FGFR	-0.0825067	-0.0934449	-0.0915963	-0.17049	-0.181351	-0.130142	-0.123826	0.490179	0.355884	Activator group 2
FGF_SIGNALING	Fgf18	PID_FGF_PATHWAY	http://www.broadinstitute.org/gsea/msigdb/cards/PID_FGF_PATHWAY	-0.0735184	-0.0549961	-0.292062	-0.295561	-0.25935	-0.173094	-0.12994	0.454687	0.761986	Activator group 2
FGF_SIGNALING	Fgf1	PID_FGF_PATHWAY	http://www.broadinstitute.org/gsea/msigdb/cards/PID_FGF_PATHWAY	0.013911	-0.0942206	-0.345977	-0.231672	-0.0368995	-0.0885936	0.0303006	0.251078	0.557015	Activator group 2
FGF_SIGNALING	Adcy9	REACTOME_DOWNSTREAM_SIGNALING_OF_ACTIVATED_FGFR	http://www.broadinstitute.org/gsea/msigdb/cards/REACTOME_DOWNSTREAM_SIGNALING_OF_ACTIVATED_FGFR	0.035472	0.101257	-0.0244987	-0.190111	-0.177971	-0.1108	-0.154598	0.29272	0.416475	Activator group 2
FGF_SIGNALING	Nr4a1	REACTOME_DOWNSTREAM_SIGNALING_OF_ACTIVATED_FGFR	http://www.broadinstitute.org/gsea/msigdb/cards/REACTOME_DOWNSTREAM_SIGNALING_OF_ACTIVATED_FGFR	0.0500733	-0.00866155	-0.170317	-0.298067	-0.388921	-0.171422	-0.165983	0.5441	0.852187	Activator group 2
FGF_SIGNALING	Pik3r1	PID_FGF_PATHWAY	http://www.broadinstitute.org/gsea/msigdb/cards/PID_FGF_PATHWAY	0.0848549	0.0258837	-0.317993	-0.309755	-0.51459	-0.160877	-0.100542	0.484052	0.746035	Activator group 2
FGF_SIGNALING	Prkacb	REACTOME_DOWNSTREAM_SIGNALING_OF_ACTIVATED_FGFR	http://www.broadinstitute.org/gsea/msigdb/cards/REACTOME_DOWNSTREAM_SIGNALING_OF_ACTIVATED_FGFR	0.164521	0.159456	-0.0358441	-0.235952	-0.281098	-0.157824	-0.153967	0.17395	0.358928	Activator group 2
FGF_SIGNALING	Adcy4	REACTOME_DOWNSTREAM_SIGNALING_OF_ACTIVATED_FGFR	http://www.broadinstitute.org/gsea/msigdb/cards/REACTOME_DOWNSTREAM_SIGNALING_OF_ACTIVATED_FGFR	0.173009	0.125956	-0.230146	-0.367073	-0.338081	-0.241988	-0.211904	0.28655	0.597142	Activator group 2
FGF_SIGNALING	Pik3ca	PID_FGF_PATHWAY	http://www.broadinstitute.org/gsea/msigdb/cards/PID_FGF_PATHWAY	0.18278	0.179972	0.036843	-0.186658	-0.261589	-0.173122	-0.201224	0.252587	0.381506	Activator group 2
FGF_SIGNALING	Il17rd	PID_FGF_PATHWAY	http://www.broadinstitute.org/gsea/msigdb/cards/PID_FGF_PATHWAY	0.195669	0.196392	0.172496	-0.204449	-0.308022	-0.215436	-0.257529	0.134576	0.323536	Activator group 2
FGF_SIGNALING	Sdc2	PID_FGF_PATHWAY	http://www.broadinstitute.org/gsea/msigdb/cards/PID_FGF_PATHWAY	0.196334	0.130078	-0.14637	-0.232682	-0.437776	-0.197962	-0.204756	0.268724	0.465941	Activator group 2
FGF_SIGNALING	Stat3	REACTOME_SIGNALING_BY_FGFR_IN_DISEASE	http://www.broadinstitute.org/gsea/msigdb/cards/REACTOME_SIGNALING_BY_FGFR_IN_DISEASE	0.198571	0.169447	-0.140541	-0.248358	-0.243484	-0.136292	-0.161764	0.261101	0.334759	Activator group 2
FGF_SIGNALING	Itpr2	REACTOME_DOWNSTREAM_SIGNALING_OF_ACTIVATED_FGFR	http://www.broadinstitute.org/gsea/msigdb/cards/REACTOME_DOWNSTREAM_SIGNALING_OF_ACTIVATED_FGFR	0.207972	0.137517	-0.0248349	-0.224958	-0.251084	-0.135825	-0.205687	0.205322	0.451222	Activator group 2
FGF_SIGNALING	Fgf7	REACTOME_DOWNSTREAM_SIGNALING_OF_ACTIVATED_FGFR	http://www.broadinstitute.org/gsea/msigdb/cards/REACTOME_DOWNSTREAM_SIGNALING_OF_ACTIVATED_FGFR	0.213895	0.239188	0.241683	-0.210322	-0.327278	-0.163434	-0.272958	0.158787	0.344383	Activator group 2
FGF_SIGNALING	Fgfr1	PID_FGF_PATHWAY	http://www.broadinstitute.org/gsea/msigdb/cards/PID_FGF_PATHWAY	0.221175	0.129286	-0.101326	-0.268482	-0.32485	-0.199195	-0.218338	0.264282	0.418792	Activator group 2
FGF_SIGNALING	Prkar2b	REACTOME_DOWNSTREAM_SIGNALING_OF_ACTIVATED_FGFR	http://www.broadinstitute.org/gsea/msigdb/cards/REACTOME_DOWNSTREAM_SIGNALING_OF_ACTIVATED_FGFR	0.245038	0.178087	-0.00983218	-0.206656	-0.236486	-0.224553	-0.24612	0.14912	0.353635	Activator group 2
FGF_SIGNALING	Cdh2	PID_FGF_PATHWAY	http://www.broadinstitute.org/gsea/msigdb/cards/PID_FGF_PATHWAY	0.24659	0.193029	-0.161778	-0.257435	-0.296812	-0.205995	-0.249104	0.178956	0.387247	Activator group 2
FGF_SIGNALING	Spry2	PID_FGF_PATHWAY	http://www.broadinstitute.org/gsea/msigdb/cards/PID_FGF_PATHWAY	0.3107	0.311501	0.115085	-0.211378	-0.254003	-0.155215	-0.265529	0.155244	0.313224	Activator group 2
HEDGEHOG_SIGNALING	Bmp7	KEGG_HEDGEHOG_SIGNALING_PATHWAY	http://www.broadinstitute.org/gsea/msigdb/cards/KEGG_HEDGEHOG_SIGNALING_PATHWAY	-0.769607	-0.807955	-0.444178	0.227674	0.547565	0.198027	0.563265	0.201832	-0.668223	Inhibitor group 1
HEDGEHOG_SIGNALING	Wnt11	KEGG_HEDGEHOG_SIGNALING_PATHWAY	http://www.broadinstitute.org/gsea/msigdb/cards/KEGG_HEDGEHOG_SIGNALING_PATHWAY	-0.764239	-0.609327	0.263236	0.555505	0.637245	0.487693	0.5874	-0.327461	-0.953229	Inhibitor group 1
HEDGEHOG_SIGNALING	Prkx	KEGG_HEDGEHOG_SIGNALING_PATHWAY	http://www.broadinstitute.org/gsea/msigdb/cards/KEGG_HEDGEHOG_SIGNALING_PATHWAY	-0.755932	-0.755765	-0.47253	0.164337	0.491868	0.103517	0.511574	0.282373	-0.544138	Inhibitor group 1
HEDGEHOG_SIGNALING	Bmp8a	KEGG_HEDGEHOG_SIGNALING_PATHWAY	http://www.broadinstitute.org/gsea/msigdb/cards/KEGG_HEDGEHOG_SIGNALING_PATHWAY	-0.677136	-0.557284	0.214309	0.504693	0.515456	0.431407	0.482907	-0.139065	-0.752264	Inhibitor group 1
HEDGEHOG_SIGNALING	Bmp6	KEGG_HEDGEHOG_SIGNALING_PATHWAY	http://www.broadinstitute.org/gsea/msigdb/cards/KEGG_HEDGEHOG_SIGNALING_PATHWAY	-0.566642	-0.619923	-0.301797	0.177097	0.494765	0.123606	0.428075	-0.0760268	-0.376042	Inhibitor group 1
HEDGEHOG_SIGNALING	Csnk1g3	KEGG_HEDGEHOG_SIGNALING_PATHWAY	http://www.broadinstitute.org/gsea/msigdb/cards/KEGG_HEDGEHOG_SIGNALING_PATHWAY	-0.557557	-0.525418	-0.0402038	0.381507	0.499634	0.335748	0.438492	-0.178054	-0.701347	Inhibitor group 1
HEDGEHOG_SIGNALING	Csnk1e	KEGG_HEDGEHOG_SIGNALING_PATHWAY	http://www.broadinstitute.org/gsea/msigdb/cards/KEGG_HEDGEHOG_SIGNALING_PATHWAY	-0.414906	-0.490966	0.281932	0.523113	0.493705	0.487816	0.39196	-0.268326	-0.76367	Inhibitor group 1
HEDGEHOG_SIGNALING	Fbxw11	KEGG_HEDGEHOG_SIGNALING_PATHWAY	http://www.broadinstitute.org/gsea/msigdb/cards/KEGG_HEDGEHOG_SIGNALING_PATHWAY	-0.395857	-0.544847	-0.162102	0.214961	0.351786	0.146989	0.346424	-0.0696512	-0.412202	Inhibitor group 1
HEDGEHOG_SIGNALING	Bmp2	KEGG_HEDGEHOG_SIGNALING_PATHWAY	http://www.broadinstitute.org/gsea/msigdb/cards/KEGG_HEDGEHOG_SIGNALING_PATHWAY	-0.362743	-0.426182	-0.0339667	0.13374	0.22999	0.264328	0.268988	0.372266	-0.180922	Inhibitor group 1
HEDGEHOG_SIGNALING	Bmp4	KEGG_HEDGEHOG_SIGNALING_PATHWAY	http://www.broadinstitute.org/gsea/msigdb/cards/KEGG_HEDGEHOG_SIGNALING_PATHWAY	-0.247376	-0.334152	-0.0552321	0.208985	0.175343	0.157985	0.258108	0.0630489	-0.344279	Inhibitor group 1
HEDGEHOG_SIGNALING	Csnk1d	KEGG_HEDGEHOG_SIGNALING_PATHWAY	http://www.broadinstitute.org/gsea/msigdb/cards/KEGG_HEDGEHOG_SIGNALING_PATHWAY	-0.158867	-0.263103	0.0305964	0.241995	0.303171	0.160036	0.127141	-0.222596	-0.41861	Inhibitor group 2
HEDGEHOG_SIGNALING	Wnt5a	KEGG_HEDGEHOG_SIGNALING_PATHWAY	http://www.broadinstitute.org/gsea/msigdb/cards/KEGG_HEDGEHOG_SIGNALING_PATHWAY	-0.0625782	0.036248	0.293089	0.365207	0.427046	0.252983	0.298006	-0.732962	-1.17302	Inhibitor group 2
HEDGEHOG_SIGNALING	Gli3	KEGG_HEDGEHOG_SIGNALING_PATHWAY	http://www.broadinstitute.org/gsea/msigdb/cards/KEGG_HEDGEHOG_SIGNALING_PATHWAY	0.0979752	0.166729	0.374563	0.145541	0.0816499	0.034766	-0.00800032	-0.430835	-0.484835	Activator group 1
HEDGEHOG_SIGNALING	Hhip	KEGG_HEDGEHOG_SIGNALING_PATHWAY	http://www.broadinstitute.org/gsea/msigdb/cards/KEGG_HEDGEHOG_SIGNALING_PATHWAY	0.259968	0.328318	0.316787	0.0287093	-0.0811004	-0.16774	-0.0962589	-0.48541	-0.373611	Activator group 1
HEDGEHOG_SIGNALING	Shh	KEGG_HEDGEHOG_SIGNALING_PATHWAY	http://www.broadinstitute.org/gsea/msigdb/cards/KEGG_HEDGEHOG_SIGNALING_PATHWAY	0.625185	0.651296	0.597327	0.148753	0.0973258	-0.0861363	-0.121	-1.04979	-1.21951	Activator group 1
HEDGEHOG_SIGNALING	Ptch1	KEGG_HEDGEHOG_SIGNALING_PATHWAY	http://www.broadinstitute.org/gsea/msigdb/cards/KEGG_HEDGEHOG_SIGNALING_PATHWAY	0.667167	0.640386	0.404913	0.0944688	0.000269923	-0.0789787	-0.165885	-0.954924	-0.821039	Activator group 1
HEDGEHOG_SIGNALING	Ptch2	KEGG_HEDGEHOG_SIGNALING_PATHWAY	http://www.broadinstitute.org/gsea/msigdb/cards/KEGG_HEDGEHOG_SIGNALING_PATHWAY	0.679781	0.622999	0.420133	0.133262	0.113492	-0.0690494	-0.198998	-1.01684	-1.05089	Activator group 1
HEDGEHOG_SIGNALING	Gli1	KEGG_HEDGEHOG_SIGNALING_PATHWAY	http://www.broadinstitute.org/gsea/msigdb/cards/KEGG_HEDGEHOG_SIGNALING_PATHWAY	0.691146	0.60495	0.431726	0.107326	0.0429488	-0.0641278	-0.233405	-1.0122	-0.775867	Activator group 1
HEDGEHOG_SIGNALING	Smo	KEGG_HEDGEHOG_SIGNALING_PATHWAY	http://www.broadinstitute.org/gsea/msigdb/cards/KEGG_HEDGEHOG_SIGNALING_PATHWAY	0.393643	0.39011	0.146588	-0.0780341	-0.137883	-0.119976	-0.133416	-0.239492	-0.366305	Activator group 1
HEDGEHOG_SIGNALING	Gli2	KEGG_HEDGEHOG_SIGNALING_PATHWAY	http://www.broadinstitute.org/gsea/msigdb/cards/KEGG_HEDGEHOG_SIGNALING_PATHWAY	0.408509	0.422016	0.0896993	-0.0842835	-0.121288	-0.12019	-0.160705	-0.113818	-0.493959	Activator group 1
HEDGEHOG_SIGNALING	Wnt2	KEGG_HEDGEHOG_SIGNALING_PATHWAY	http://www.broadinstitute.org/gsea/msigdb/cards/KEGG_HEDGEHOG_SIGNALING_PATHWAY	0.109069	0.103052	-0.156653	-0.177196	-0.244354	-0.13709	-0.133345	0.157134	0.554753	Activator group 2
HEDGEHOG_SIGNALING	Prkacb	KEGG_HEDGEHOG_SIGNALING_PATHWAY	http://www.broadinstitute.org/gsea/msigdb/cards/KEGG_HEDGEHOG_SIGNALING_PATHWAY	0.164521	0.159456	-0.0358441	-0.235952	-0.281098	-0.157824	-0.153967	0.17395	0.358928	Activator group 2
HEDGEHOG_SIGNALING	Gas1	KEGG_HEDGEHOG_SIGNALING_PATHWAY	http://www.broadinstitute.org/gsea/msigdb/cards/KEGG_HEDGEHOG_SIGNALING_PATHWAY	0.166195	0.163147	-0.146302	-0.26949	-0.329281	-0.10869	-0.212912	0.371271	0.50238	Activator group 2
HEDGEHOG_SIGNALING	Btrc	KEGG_HEDGEHOG_SIGNALING_PATHWAY	http://www.broadinstitute.org/gsea/msigdb/cards/KEGG_HEDGEHOG_SIGNALING_PATHWAY	0.221354	0.141264	-0.169618	-0.270071	-0.308471	-0.174376	-0.135271	0.163823	0.350025	Activator group 2
NOTCH_SIGNALING	Numb	KEGG_NOTCH_SIGNALING_PATHWAY	http://www.broadinstitute.org/gsea/msigdb/cards/KEGG_NOTCH_SIGNALING_PATHWAY	-0.804612	-0.820688	-0.427721	0.225641	0.550053	0.136791	0.571683	0.0301893	-0.643324	Inhibitor group 1
NOTCH_SIGNALING	Jag1	KEGG_NOTCH_SIGNALING_PATHWAY	http://www.broadinstitute.org/gsea/msigdb/cards/KEGG_NOTCH_SIGNALING_PATHWAY	-0.499408	-0.474124	-0.0311219	0.388514	0.478684	0.207742	0.388348	-0.131785	-0.5539	Inhibitor group 1
NOTCH_SIGNALING	Notch1	KEGG_NOTCH_SIGNALING_PATHWAY	http://www.broadinstitute.org/gsea/msigdb/cards/KEGG_NOTCH_SIGNALING_PATHWAY	-0.291697	-0.183336	0.257857	0.270805	0.331359	0.25261	0.168608	-0.196292	-0.498065	Inhibitor group 2
NOTCH_SIGNALING	Hdac1	KEGG_NOTCH_SIGNALING_PATHWAY	http://www.broadinstitute.org/gsea/msigdb/cards/KEGG_NOTCH_SIGNALING_PATHWAY	0.0514539	0.0363479	0.187243	0.157084	0.128605	0.0698665	0.0407696	-0.327645	-0.427049	Activator group 1
NOTCH_SIGNALING	Ctbp2	KEGG_NOTCH_SIGNALING_PATHWAY	http://www.broadinstitute.org/gsea/msigdb/cards/KEGG_NOTCH_SIGNALING_PATHWAY	0.219139	0.227396	0.191128	0.166534	-0.00859917	0.0304332	-0.0362428	-0.458692	-0.41183	Activator group 1
NOTCH_SIGNALING	Dtx3l	KEGG_NOTCH_SIGNALING_PATHWAY	http://www.broadinstitute.org/gsea/msigdb/cards/KEGG_NOTCH_SIGNALING_PATHWAY	0.185717	0.144716	-0.0620632	-0.22237	-0.275926	-0.151495	-0.208607	0.185774	0.502618	Activator group 2
NOTCH_SIGNALING	Notch4	KEGG_NOTCH_SIGNALING_PATHWAY	http://www.broadinstitute.org/gsea/msigdb/cards/KEGG_NOTCH_SIGNALING_PATHWAY	0.188757	0.128185	-0.0879645	-0.240714	-0.277052	-0.189121	-0.216121	0.256862	0.38586	Activator group 2
NOTCH_SIGNALING	Adam17	KEGG_NOTCH_SIGNALING_PATHWAY	http://www.broadinstitute.org/gsea/msigdb/cards/KEGG_NOTCH_SIGNALING_PATHWAY	0.205047	0.184006	-0.0775803	-0.213977	-0.246503	-0.143997	-0.216844	0.175752	0.347899	Activator group 2
NOTCH_SIGNALING	Ncor2	KEGG_NOTCH_SIGNALING_PATHWAY	http://www.broadinstitute.org/gsea/msigdb/cards/KEGG_NOTCH_SIGNALING_PATHWAY	0.250266	0.145915	-0.119043	-0.221226	-0.258947	-0.112775	-0.142661	0.212338	0.295257	Activator group 2
CIRCADIAN_CLOCK	Ncoa2	REACTOME_BMAL1_CLOCK_NPAS2_ACTIVATES_CIRCADIAN_EXPRESSION	http://www.broadinstitute.org/gsea/msigdb/cards/REACTOME_BMAL1_CLOCK_NPAS2_ACTIVATES_CIRCADIAN_EXPRESSION	-0.54576	-0.593287	-0.240669	0.184355	0.42508	0.167089	0.392532	0.0195198	-0.398833	Inhibitor group 1
CIRCADIAN_CLOCK	Csnk1e	REACTOME_CIRCADIAN_CLOCK	http://www.broadinstitute.org/gsea/msigdb/cards/REACTOME_CIRCADIAN_CLOCK	-0.414906	-0.490966	0.281932	0.523113	0.493705	0.487816	0.39196	-0.268326	-0.76367	Inhibitor group 1
CIRCADIAN_CLOCK	Cpt1a	REACTOME_CIRCADIAN_CLOCK	http://www.broadinstitute.org/gsea/msigdb/cards/REACTOME_CIRCADIAN_CLOCK	-0.317243	-0.367427	0.0490677	0.104185	0.130753	0.184645	0.25392	0.36901	-0.274339	Inhibitor group 1
CIRCADIAN_CLOCK	Mef2d	REACTOME_CIRCADIAN_CLOCK	http://www.broadinstitute.org/gsea/msigdb/cards/REACTOME_CIRCADIAN_CLOCK	-0.274322	-0.370159	-0.124161	0.206313	0.294817	0.2003	0.252003	-0.00783008	-0.103495	Inhibitor group 1
CIRCADIAN_CLOCK	Elovl3	REACTOME_CIRCADIAN_CLOCK	http://www.broadinstitute.org/gsea/msigdb/cards/REACTOME_CIRCADIAN_CLOCK	-0.40048	-0.432238	0.307273	0.44347	0.416272	0.33371	0.328998	-0.315395	-0.561704	Inhibitor group 2
CIRCADIAN_CLOCK	Ccrn4l	REACTOME_BMAL1_CLOCK_NPAS2_ACTIVATES_CIRCADIAN_EXPRESSION	http://www.broadinstitute.org/gsea/msigdb/cards/REACTOME_BMAL1_CLOCK_NPAS2_ACTIVATES_CIRCADIAN_EXPRESSION	-0.35209	-0.360991	-0.0914245	0.197378	0.37595	0.22675	0.295654	-0.10966	-0.467618	Inhibitor group 2
CIRCADIAN_CLOCK	Rxra	REACTOME_BMAL1_CLOCK_NPAS2_ACTIVATES_CIRCADIAN_EXPRESSION	http://www.broadinstitute.org/gsea/msigdb/cards/REACTOME_BMAL1_CLOCK_NPAS2_ACTIVATES_CIRCADIAN_EXPRESSION	-0.185632	-0.411295	-0.0649073	0.251354	0.180553	0.217382	0.2374	0.0197135	-0.207845	Inhibitor group 2
CIRCADIAN_CLOCK	Csnk1d	REACTOME_CIRCADIAN_CLOCK	http://www.broadinstitute.org/gsea/msigdb/cards/REACTOME_CIRCADIAN_CLOCK	-0.158867	-0.263103	0.0305964	0.241995	0.303171	0.160036	0.127141	-0.222596	-0.41861	Inhibitor group 2
CIRCADIAN_CLOCK	Tbl1xr1	REACTOME_BMAL1_CLOCK_NPAS2_ACTIVATES_CIRCADIAN_EXPRESSION	http://www.broadinstitute.org/gsea/msigdb/cards/REACTOME_BMAL1_CLOCK_NPAS2_ACTIVATES_CIRCADIAN_EXPRESSION	-0.107623	-0.0883844	-0.00577724	0.25793	0.277578	0.11779	0.17458	-0.264197	-0.452107	Inhibitor group 2
CIRCADIAN_CLOCK	Per2	REACTOME_BMAL1_CLOCK_NPAS2_ACTIVATES_CIRCADIAN_EXPRESSION	http://www.broadinstitute.org/gsea/msigdb/cards/REACTOME_BMAL1_CLOCK_NPAS2_ACTIVATES_CIRCADIAN_EXPRESSION	-0.16085	-0.17237	-0.16226	-0.173941	-0.152207	-0.0835664	0.0229709	0.156119	0.623585	Activator group 2
CIRCADIAN_CLOCK	Per1	REACTOME_BMAL1_CLOCK_NPAS2_ACTIVATES_CIRCADIAN_EXPRESSION	http://www.broadinstitute.org/gsea/msigdb/cards/REACTOME_BMAL1_CLOCK_NPAS2_ACTIVATES_CIRCADIAN_EXPRESSION	-0.142552	-0.531805	-0.52824	-0.573697	-0.268204	-0.385975	0.133658	0.885022	0.820254	Activator group 2
CIRCADIAN_CLOCK	Serpine1	REACTOME_BMAL1_CLOCK_NPAS2_ACTIVATES_CIRCADIAN_EXPRESSION	http://www.broadinstitute.org/gsea/msigdb/cards/REACTOME_BMAL1_CLOCK_NPAS2_ACTIVATES_CIRCADIAN_EXPRESSION	-0.0799605	-0.114991	-0.186793	-0.201909	-0.240958	-0.154423	-0.0597776	0.3056	0.693712	Activator group 2
CIRCADIAN_CLOCK	Dbp	REACTOME_BMAL1_CLOCK_NPAS2_ACTIVATES_CIRCADIAN_EXPRESSION	http://www.broadinstitute.org/gsea/msigdb/cards/REACTOME_BMAL1_CLOCK_NPAS2_ACTIVATES_CIRCADIAN_EXPRESSION	-0.0356586	-0.107537	-0.280641	-0.434015	-0.624901	-0.379319	-0.195252	0.728124	1.65526	Activator group 2
CIRCADIAN_CLOCK	Ppargc1a	REACTOME_BMAL1_CLOCK_NPAS2_ACTIVATES_CIRCADIAN_EXPRESSION	http://www.broadinstitute.org/gsea/msigdb/cards/REACTOME_BMAL1_CLOCK_NPAS2_ACTIVATES_CIRCADIAN_EXPRESSION	0.0803683	0.000343883	-0.121613	-0.202957	-0.0900205	-0.080741	-0.106701	0.335878	0.40566	Activator group 2
CIRCADIAN_CLOCK	Cry2	REACTOME_BMAL1_CLOCK_NPAS2_ACTIVATES_CIRCADIAN_EXPRESSION	http://www.broadinstitute.org/gsea/msigdb/cards/REACTOME_BMAL1_CLOCK_NPAS2_ACTIVATES_CIRCADIAN_EXPRESSION	0.164127	0.0858314	-0.0508148	-0.229648	-0.321994	-0.154585	-0.202765	0.215475	0.528467	Activator group 2
CIRCADIAN_CLOCK	Rora	REACTOME_BMAL1_CLOCK_NPAS2_ACTIVATES_CIRCADIAN_EXPRESSION	http://www.broadinstitute.org/gsea/msigdb/cards/REACTOME_BMAL1_CLOCK_NPAS2_ACTIVATES_CIRCADIAN_EXPRESSION	0.190665	0.122528	0.045283	-0.222704	-0.227493	-0.144443	-0.249082	0.21838	0.49363	Activator group 2
CIRCADIAN_CLOCK	Mef2c	REACTOME_CIRCADIAN_CLOCK	http://www.broadinstitute.org/gsea/msigdb/cards/REACTOME_CIRCADIAN_CLOCK	0.193282	0.147818	-0.171218	-0.27039	-0.229604	-0.199932	-0.212678	0.194813	0.446802	Activator group 2
CIRCADIAN_CLOCK	Btrc	REACTOME_CIRCADIAN_CLOCK	http://www.broadinstitute.org/gsea/msigdb/cards/REACTOME_CIRCADIAN_CLOCK	0.221354	0.141264	-0.169618	-0.270071	-0.308471	-0.174376	-0.135271	0.163823	0.350025	Activator group 2
CIRCADIAN_CLOCK	Npas2	REACTOME_BMAL1_CLOCK_NPAS2_ACTIVATES_CIRCADIAN_EXPRESSION	http://www.broadinstitute.org/gsea/msigdb/cards/REACTOME_BMAL1_CLOCK_NPAS2_ACTIVATES_CIRCADIAN_EXPRESSION	0.33225	0.280266	-0.060747	-0.193529	-0.276595	-0.169047	-0.232533	0.143268	0.130915	Activator group 2
CIRCADIAN_CLOCK	Nr1d1	REACTOME_BMAL1_CLOCK_NPAS2_ACTIVATES_CIRCADIAN_EXPRESSION	http://www.broadinstitute.org/gsea/msigdb/cards/REACTOME_BMAL1_CLOCK_NPAS2_ACTIVATES_CIRCADIAN_EXPRESSION	0.340367	0.231474	-0.138389	-0.302017	-0.527823	-0.213292	-0.379358	0.406137	1.01108	Activator group 2
CELL_CYCLE	Cdkn1a	REACTOME_S_PHASE	http://www.broadinstitute.org/gsea/msigdb/cards/REACTOME_S_PHASE	-0.551357	-0.570648	0.104189	0.531824	0.561322	0.514714	0.478992	-0.155283	-0.627168	Inhibitor group 1
CELL_CYCLE	Ppp2r1b	REACTOME_MITOTIC_PROMETAPHASE	http://www.broadinstitute.org/gsea/msigdb/cards/REACTOME_MITOTIC_PROMETAPHASE	-0.523464	-0.416736	0.157859	0.415183	0.490149	0.383766	0.356622	-0.224291	-0.641461	Inhibitor group 1
CELL_CYCLE	Clasp1	REACTOME_MITOTIC_PROMETAPHASE	http://www.broadinstitute.org/gsea/msigdb/cards/REACTOME_MITOTIC_PROMETAPHASE	-0.497175	-0.525219	-0.112935	0.259612	0.451822	0.190512	0.391788	-0.204213	-0.424503	Inhibitor group 1
CELL_CYCLE	Tuba4a	REACTOME_MITOTIC_G2_G2_M_PHASES	http://www.broadinstitute.org/gsea/msigdb/cards/REACTOME_MITOTIC_G2_G2_M_PHASES	-0.41544	-0.385	0.207842	0.395797	0.424938	0.379743	0.363614	-0.142367	-0.598088	Inhibitor group 1
CELL_CYCLE	Csnk1e	REACTOME_MITOTIC_G2_G2_M_PHASES	http://www.broadinstitute.org/gsea/msigdb/cards/REACTOME_MITOTIC_G2_G2_M_PHASES	-0.414906	-0.490966	0.281932	0.523113	0.493705	0.487816	0.39196	-0.268326	-0.76367	Inhibitor group 1
CELL_CYCLE	Cdkn2b	REACTOME_MITOTIC_G1_G1_S_PHASES	http://www.broadinstitute.org/gsea/msigdb/cards/REACTOME_MITOTIC_G1_G1_S_PHASES	-0.355844	-0.3867	-0.149831	0.131707	0.179065	0.218504	0.333525	0.301432	-0.174312	Inhibitor group 1
CELL_CYCLE	Hspa2	REACTOME_CELL_CYCLE	http://www.broadinstitute.org/gsea/msigdb/cards/REACTOME_CELL_CYCLE	-0.572489	-0.537667	-0.0879353	0.268403	0.416875	0.275683	0.391655	0.258622	-0.461101	Inhibitor group 1
CELL_CYCLE	Sfn	KEGG_CELL_CYCLE	http://www.broadinstitute.org/gsea/msigdb/cards/KEGG_CELL_CYCLE	-0.50056	-0.508491	0.219727	0.491896	0.565521	0.451852	0.473558	-0.187205	-0.900896	Inhibitor group 1
CELL_CYCLE	Tfdp2	KEGG_CELL_CYCLE	http://www.broadinstitute.org/gsea/msigdb/cards/KEGG_CELL_CYCLE	-0.33356	-0.36293	-0.115558	0.185389	0.358803	0.180607	0.262889	-0.119582	-0.41038	Inhibitor group 1
CELL_CYCLE	Rbx1	KEGG_CELL_CYCLE	http://www.broadinstitute.org/gsea/msigdb/cards/KEGG_CELL_CYCLE	-0.279412	-0.371739	-0.0514845	0.108654	0.275682	0.117963	0.309608	-0.186419	-0.109237	Inhibitor group 1
CELL_CYCLE	Cdc14a	REACTOME_REGULATION_OF_MITOTIC_CELL_CYCLE	http://www.broadinstitute.org/gsea/msigdb/cards/REACTOME_REGULATION_OF_MITOTIC_CELL_CYCLE	-0.426828	-0.331546	0.118357	0.291212	0.389708	0.290646	0.343389	-0.168034	-0.554969	Inhibitor group 2
CELL_CYCLE	Mybl2	REACTOME_MITOTIC_G1_G1_S_PHASES	http://www.broadinstitute.org/gsea/msigdb/cards/REACTOME_MITOTIC_G1_G1_S_PHASES	-0.404504	-0.397003	0.033263	0.383133	0.428186	0.356218	0.429874	-0.269402	-0.717651	Inhibitor group 2
CELL_CYCLE	Psmd4	REACTOME_S_PHASE	http://www.broadinstitute.org/gsea/msigdb/cards/REACTOME_S_PHASE	-0.336009	-0.369339	0.0697137	0.263441	0.23657	0.216261	0.284591	-0.063279	-0.46937	Inhibitor group 2
CELL_CYCLE	Dynll1	REACTOME_MITOTIC_G2_G2_M_PHASES	http://www.broadinstitute.org/gsea/msigdb/cards/REACTOME_MITOTIC_G2_G2_M_PHASES	-0.29448	-0.284737	-0.0827234	0.171297	0.226882	0.158392	0.264367	-0.0618769	-0.302108	Inhibitor group 2
CELL_CYCLE	Ppp2cb	REACTOME_MITOTIC_PROMETAPHASE	http://www.broadinstitute.org/gsea/msigdb/cards/REACTOME_MITOTIC_PROMETAPHASE	-0.290601	-0.299956	-0.0351511	0.219881	0.292909	0.17198	0.254398	-0.205419	-0.372421	Inhibitor group 2
CELL_CYCLE	Psmd8	REACTOME_S_PHASE	http://www.broadinstitute.org/gsea/msigdb/cards/REACTOME_S_PHASE	-0.274204	-0.326134	-0.0879461	0.186789	0.242889	0.169847	0.253233	-0.0656205	-0.266146	Inhibitor group 2
CELL_CYCLE	Rangap1	REACTOME_MITOTIC_PROMETAPHASE	http://www.broadinstitute.org/gsea/msigdb/cards/REACTOME_MITOTIC_PROMETAPHASE	-0.225928	-0.273349	-0.0633485	0.228126	0.307708	0.166985	0.253332	-0.239133	-0.504021	Inhibitor group 2
CELL_CYCLE	Csnk1d	REACTOME_MITOTIC_G2_G2_M_PHASES	http://www.broadinstitute.org/gsea/msigdb/cards/REACTOME_MITOTIC_G2_G2_M_PHASES	-0.158867	-0.263103	0.0305964	0.241995	0.303171	0.160036	0.127141	-0.222596	-0.41861	Inhibitor group 2
CELL_CYCLE	Mapre1	REACTOME_MITOTIC_PROMETAPHASE	http://www.broadinstitute.org/gsea/msigdb/cards/REACTOME_MITOTIC_PROMETAPHASE	-0.149402	-0.179641	-0.0124763	0.158469	0.216311	0.0823602	0.192729	-0.169858	-0.493777	Inhibitor group 2
CELL_CYCLE	Cep164	REACTOME_MITOTIC_G2_G2_M_PHASES	http://www.broadinstitute.org/gsea/msigdb/cards/REACTOME_MITOTIC_G2_G2_M_PHASES	-0.114984	-0.0649613	0.130997	0.217492	0.241774	0.132647	0.175279	-0.32669	-0.38249	Inhibitor group 2
CELL_CYCLE	E2f2	REACTOME_MITOTIC_M_M_G1_PHASES	http://www.broadinstitute.org/gsea/msigdb/cards/REACTOME_MITOTIC_M_M_G1_PHASES	-0.109909	0.0450714	0.64994	0.442987	0.322442	0.361911	0.301451	-0.605661	-0.869741	Inhibitor group 2
CELL_CYCLE	Rcc2	REACTOME_MITOTIC_PROMETAPHASE	http://www.broadinstitute.org/gsea/msigdb/cards/REACTOME_MITOTIC_PROMETAPHASE	-0.0919901	-0.0230945	0.364402	0.48014	0.376263	0.330371	0.312807	-0.740282	-1.02886	Inhibitor group 2
CELL_CYCLE	Psmb3	REACTOME_S_PHASE	http://www.broadinstitute.org/gsea/msigdb/cards/REACTOME_S_PHASE	-0.0870231	-0.074299	0.130466	0.252987	0.246907	0.156473	0.148296	-0.318057	-0.425116	Inhibitor group 2
CELL_CYCLE	Hsp90aa1	REACTOME_MITOTIC_G2_G2_M_PHASES	http://www.broadinstitute.org/gsea/msigdb/cards/REACTOME_MITOTIC_G2_G2_M_PHASES	-0.0721918	-0.0810747	0.00280748	0.234224	0.292197	0.0943629	0.200391	-0.444843	-0.637455	Inhibitor group 2
CELL_CYCLE	Cenpt	REACTOME_MITOTIC_PROMETAPHASE	http://www.broadinstitute.org/gsea/msigdb/cards/REACTOME_MITOTIC_PROMETAPHASE	-0.0716218	-0.0505463	0.0211544	0.197121	0.258121	0.114895	0.183164	-0.336923	-0.542835	Inhibitor group 2
CELL_CYCLE	Kif2a	REACTOME_MITOTIC_PROMETAPHASE	http://www.broadinstitute.org/gsea/msigdb/cards/REACTOME_MITOTIC_PROMETAPHASE	-0.0709749	-0.0454548	0.054464	0.196503	0.207022	0.0274956	0.132961	-0.318862	-0.507426	Inhibitor group 2
CELL_CYCLE	Psma7	REACTOME_S_PHASE	http://www.broadinstitute.org/gsea/msigdb/cards/REACTOME_S_PHASE	-0.0676653	-0.0632877	0.176479	0.245794	0.257128	0.141627	0.150993	-0.306822	-0.425978	Inhibitor group 2
CELL_CYCLE	Smc1a	REACTOME_MITOTIC_PROMETAPHASE	http://www.broadinstitute.org/gsea/msigdb/cards/REACTOME_MITOTIC_PROMETAPHASE	-0.0609209	-0.114772	0.104752	0.286419	0.260437	0.0925162	0.191535	-0.357798	-0.494637	Inhibitor group 2
CELL_CYCLE	Nek2	REACTOME_MITOTIC_G2_G2_M_PHASES	http://www.broadinstitute.org/gsea/msigdb/cards/REACTOME_MITOTIC_G2_G2_M_PHASES	0.51457	0.548652	0.549733	0.11518	0.171072	-0.0724884	-0.0574314	-1.06457	-1.05996	Inhibitor group 2
CELL_CYCLE	Smad2	KEGG_CELL_CYCLE	http://www.broadinstitute.org/gsea/msigdb/cards/KEGG_CELL_CYCLE	-0.307491	-0.337641	-0.0414071	0.157288	0.313976	0.164407	0.20473	-0.102618	-0.329827	Inhibitor group 2
CELL_CYCLE	Gadd45a	KEGG_CELL_CYCLE	http://www.broadinstitute.org/gsea/msigdb/cards/KEGG_CELL_CYCLE	-0.258054	-0.279424	-0.0461427	0.151692	0.279473	0.152177	0.239789	0.0883968	-0.468435	Inhibitor group 2
CELL_CYCLE	Ywhaz	KEGG_CELL_CYCLE	http://www.broadinstitute.org/gsea/msigdb/cards/KEGG_CELL_CYCLE	-0.197499	-0.262317	-0.0943531	0.19743	0.217665	0.131963	0.214644	-0.157559	-0.310291	Inhibitor group 2
CELL_CYCLE	Dkc1	REACTOME_CELL_CYCLE	http://www.broadinstitute.org/gsea/msigdb/cards/REACTOME_CELL_CYCLE	0.0693734	0.152351	0.306023	0.336581	0.333653	0.19109	0.199389	-0.69966	-0.865122	Inhibitor group 2
CELL_CYCLE	Lmnb1	REACTOME_CELL_CYCLE	http://www.broadinstitute.org/gsea/msigdb/cards/REACTOME_CELL_CYCLE	0.467078	0.518457	0.529937	0.190838	0.107798	0.0166983	-0.110236	-0.991873	-1.00228	Inhibitor group 2
CELL_CYCLE	Sec13	REACTOME_MITOTIC_PROMETAPHASE	http://www.broadinstitute.org/gsea/msigdb/cards/REACTOME_MITOTIC_PROMETAPHASE	-0.078224	-0.0585994	0.126088	0.202243	0.233877	0.063282	0.0417065	-0.364378	-0.372798	Activator group 1
CELL_CYCLE	Cetn2	REACTOME_MITOTIC_G2_G2_M_PHASES	http://www.broadinstitute.org/gsea/msigdb/cards/REACTOME_MITOTIC_G2_G2_M_PHASES	-0.0672729	-0.0541847	0.235404	0.230038	0.222064	0.154569	0.157952	-0.296309	-0.426736	Activator group 1
CELL_CYCLE	Ppp2r5e	REACTOME_MITOTIC_PROMETAPHASE	http://www.broadinstitute.org/gsea/msigdb/cards/REACTOME_MITOTIC_PROMETAPHASE	-0.0388385	-0.052922	0.0979686	0.253184	0.222134	0.135525	0.142129	-0.3145	-0.43489	Activator group 1
CELL_CYCLE	Seh1l	REACTOME_MITOTIC_PROMETAPHASE	http://www.broadinstitute.org/gsea/msigdb/cards/REACTOME_MITOTIC_PROMETAPHASE	-0.00612876	-0.0239492	0.148167	0.205303	0.232681	0.0304899	0.12316	-0.40443	-0.590366	Activator group 1
CELL_CYCLE	Fgfr1op	REACTOME_MITOTIC_G2_G2_M_PHASES	http://www.broadinstitute.org/gsea/msigdb/cards/REACTOME_MITOTIC_G2_G2_M_PHASES	0.0389186	0.06728	0.164253	0.200113	0.173703	0.0266307	0.0635515	-0.449176	-0.453799	Activator group 1
CELL_CYCLE	Hdac1	REACTOME_MITOTIC_G1_G1_S_PHASES	http://www.broadinstitute.org/gsea/msigdb/cards/REACTOME_MITOTIC_G1_G1_S_PHASES	0.0514539	0.0363479	0.187243	0.157084	0.128605	0.0698665	0.0407696	-0.327645	-0.427049	Activator group 1
CELL_CYCLE	E2f3	REACTOME_MITOTIC_M_M_G1_PHASES	http://www.broadinstitute.org/gsea/msigdb/cards/REACTOME_MITOTIC_M_M_G1_PHASES	0.0773222	0.115219	0.193783	0.155257	0.160832	0.0846489	0.0614429	-0.364899	-0.521188	Activator group 1
CELL_CYCLE	Rpa3	REACTOME_S_PHASE	http://www.broadinstitute.org/gsea/msigdb/cards/REACTOME_S_PHASE	0.120869	0.217238	0.288931	0.148436	0.0891392	0.0128953	0.00775433	-0.478606	-0.446964	Activator group 1
CELL_CYCLE	Ccnd2	REACTOME_MITOTIC_G1_G1_S_PHASES	http://www.broadinstitute.org/gsea/msigdb/cards/REACTOME_MITOTIC_G1_G1_S_PHASES	0.137592	0.163368	0.291516	0.183467	0.155662	0.0805004	0.0146488	-0.504958	-0.415596	Activator group 1
CELL_CYCLE	Bub3	REACTOME_REGULATION_OF_MITOTIC_CELL_CYCLE	http://www.broadinstitute.org/gsea/msigdb/cards/REACTOME_REGULATION_OF_MITOTIC_CELL_CYCLE	0.138351	0.226576	0.303382	0.111578	0.137272	0.00882608	-0.131012	-0.391117	-0.336121	Activator group 1
CELL_CYCLE	Cdk4	REACTOME_S_PHASE	http://www.broadinstitute.org/gsea/msigdb/cards/REACTOME_S_PHASE	0.156372	0.199299	0.235028	0.15971	0.0922709	0.00272077	-0.014732	-0.495058	-0.500337	Activator group 1
CELL_CYCLE	Lin9	REACTOME_MITOTIC_G1_G1_S_PHASES	http://www.broadinstitute.org/gsea/msigdb/cards/REACTOME_MITOTIC_G1_G1_S_PHASES	0.156887	0.210141	0.264157	0.0718014	0.0497185	-0.0164741	-0.0884089	-0.290769	-0.334073	Activator group 1
CELL_CYCLE	Rbbp4	REACTOME_MITOTIC_G1_G1_S_PHASES	http://www.broadinstitute.org/gsea/msigdb/cards/REACTOME_MITOTIC_G1_G1_S_PHASES	0.178595	0.155794	0.19078	0.182551	0.187016	-0.0077742	-0.0185983	-0.499032	-0.605061	Activator group 1
CELL_CYCLE	Nup43	REACTOME_MITOTIC_PROMETAPHASE	http://www.broadinstitute.org/gsea/msigdb/cards/REACTOME_MITOTIC_PROMETAPHASE	0.200709	0.213882	0.286499	0.136846	0.0467919	0.0446928	0.00925512	-0.438497	-0.37737	Activator group 1
CELL_CYCLE	Smc3	REACTOME_MITOTIC_PROMETAPHASE	http://www.broadinstitute.org/gsea/msigdb/cards/REACTOME_MITOTIC_PROMETAPHASE	0.202955	0.215198	0.20387	0.0840278	0.0456046	-0.0114631	-0.108256	-0.432367	-0.395028	Activator group 1
CELL_CYCLE	Dsn1	REACTOME_MITOTIC_PROMETAPHASE	http://www.broadinstitute.org/gsea/msigdb/cards/REACTOME_MITOTIC_PROMETAPHASE	0.234188	0.277083	0.213834	0.108906	0.115124	-0.0833834	-0.0607632	-0.512321	-0.512165	Activator group 1
CELL_CYCLE	Ccne1	REACTOME_S_PHASE	http://www.broadinstitute.org/gsea/msigdb/cards/REACTOME_S_PHASE	0.248784	0.264377	0.23064	0.118072	0.0842332	-0.0483014	-0.00323855	-0.542204	-0.521349	Activator group 1
CELL_CYCLE	Rbl1	REACTOME_MITOTIC_G1_G1_S_PHASES	http://www.broadinstitute.org/gsea/msigdb/cards/REACTOME_MITOTIC_G1_G1_S_PHASES	0.256308	0.408236	0.293274	0.0300421	-0.0732123	-0.114797	-0.116671	-0.527832	-0.328578	Activator group 1
CELL_CYCLE	Mis12	REACTOME_MITOTIC_PROMETAPHASE	http://www.broadinstitute.org/gsea/msigdb/cards/REACTOME_MITOTIC_PROMETAPHASE	0.26685	0.338835	0.234451	-0.0147106	-0.0316548	-0.112994	-0.152255	-0.36085	-0.318793	Activator group 1
CELL_CYCLE	Nup37	REACTOME_MITOTIC_PROMETAPHASE	http://www.broadinstitute.org/gsea/msigdb/cards/REACTOME_MITOTIC_PROMETAPHASE	0.281476	0.241305	0.241363	0.0737831	0.0347105	-0.0694905	-0.0321267	-0.456088	-0.406754	Activator group 1
CELL_CYCLE	Cep70	REACTOME_MITOTIC_G2_G2_M_PHASES	http://www.broadinstitute.org/gsea/msigdb/cards/REACTOME_MITOTIC_G2_G2_M_PHASES	0.285795	0.290221	0.196511	-0.0528658	0.0609275	-0.218462	-0.164694	-0.330342	-0.272286	Activator group 1
CELL_CYCLE	Cenpq	REACTOME_MITOTIC_PROMETAPHASE	http://www.broadinstitute.org/gsea/msigdb/cards/REACTOME_MITOTIC_PROMETAPHASE	0.286738	0.340469	0.313365	0.0804343	-0.0474493	-0.110424	-0.0816115	-0.473418	-0.495662	Activator group 1
CELL_CYCLE	Mcm7	REACTOME_S_PHASE	http://www.broadinstitute.org/gsea/msigdb/cards/REACTOME_S_PHASE	0.289214	0.304449	0.301199	0.132855	0.0435481	-0.0638851	-0.0672691	-0.568826	-0.609681	Activator group 1
CELL_CYCLE	Incenp	REACTOME_MITOTIC_PROMETAPHASE	http://www.broadinstitute.org/gsea/msigdb/cards/REACTOME_MITOTIC_PROMETAPHASE	0.292895	0.220778	0.204379	0.149764	-0.0446229	0.0295234	0.0397299	-0.50556	-0.422403	Activator group 1
CELL_CYCLE	Rfc5	REACTOME_S_PHASE	http://www.broadinstitute.org/gsea/msigdb/cards/REACTOME_S_PHASE	0.307365	0.344947	0.249528	0.0412281	-0.00294551	-0.102911	-0.107749	-0.563402	-0.405737	Activator group 1
CELL_CYCLE	Pold2	REACTOME_S_PHASE	http://www.broadinstitute.org/gsea/msigdb/cards/REACTOME_S_PHASE	0.307421	0.327526	0.275209	0.0919085	-0.00275721	-0.0172476	-0.0730829	-0.565938	-0.388883	Activator group 1
CELL_CYCLE	Cep57	REACTOME_MITOTIC_G2_G2_M_PHASES	http://www.broadinstitute.org/gsea/msigdb/cards/REACTOME_MITOTIC_G2_G2_M_PHASES	0.31143	0.367033	0.326507	0.0732679	-0.0236383	-0.108979	-0.119128	-0.369463	-0.322263	Activator group 1
CELL_CYCLE	Ercc6l	REACTOME_MITOTIC_PROMETAPHASE	http://www.broadinstitute.org/gsea/msigdb/cards/REACTOME_MITOTIC_PROMETAPHASE	0.317737	0.36715	0.279484	0.0905531	0.0957504	-0.0648705	-0.0641538	-0.675508	-0.660248	Activator group 1
CELL_CYCLE	Pola2	REACTOME_S_PHASE	http://www.broadinstitute.org/gsea/msigdb/cards/REACTOME_S_PHASE	0.319282	0.377356	0.262535	0.0122693	-0.0468691	-0.138352	-0.179635	-0.55515	-0.345739	Activator group 1
CELL_CYCLE	Cenpp	REACTOME_MITOTIC_PROMETAPHASE	http://www.broadinstitute.org/gsea/msigdb/cards/REACTOME_MITOTIC_PROMETAPHASE	0.323	0.334889	0.291844	0.058657	0.0488262	-0.104375	-0.146244	-0.517312	-0.468238	Activator group 1
CELL_CYCLE	Bub1	REACTOME_MITOTIC_PROMETAPHASE	http://www.broadinstitute.org/gsea/msigdb/cards/REACTOME_MITOTIC_PROMETAPHASE	0.324671	0.335772	0.303413	0.035251	-0.0200513	-0.11245	-0.148285	-0.478619	-0.411528	Activator group 1
CELL_CYCLE	Pcna	REACTOME_S_PHASE	http://www.broadinstitute.org/gsea/msigdb/cards/REACTOME_S_PHASE	0.326557	0.358529	0.307754	0.0645905	-0.0113323	-0.0977803	-0.26253	-0.540242	-0.382093	Activator group 1
CELL_CYCLE	Plk4	REACTOME_MITOTIC_G2_G2_M_PHASES	http://www.broadinstitute.org/gsea/msigdb/cards/REACTOME_MITOTIC_G2_G2_M_PHASES	0.328063	0.352721	0.217935	0.0295549	0.0147307	-0.14149	-0.139433	-0.559321	-0.552383	Activator group 1
CELL_CYCLE	Rfc4	REACTOME_S_PHASE	http://www.broadinstitute.org/gsea/msigdb/cards/REACTOME_S_PHASE	0.328392	0.427596	0.446139	0.128096	0.0449927	-0.0472307	-0.13235	-0.749754	-0.60833	Activator group 1
CELL_CYCLE	Fen1	REACTOME_S_PHASE	http://www.broadinstitute.org/gsea/msigdb/cards/REACTOME_S_PHASE	0.329956	0.452507	0.408563	0.118863	0.0245152	-0.0597572	-0.19532	-0.753799	-0.504336	Activator group 1
CELL_CYCLE	Mlf1ip	REACTOME_MITOTIC_PROMETAPHASE	http://www.broadinstitute.org/gsea/msigdb/cards/REACTOME_MITOTIC_PROMETAPHASE	0.333997	0.351464	0.295055	0.0710082	-0.0435356	-0.10645	-0.177996	-0.475706	-0.38688	Activator group 1
CELL_CYCLE	Apitd1	REACTOME_MITOTIC_PROMETAPHASE	http://www.broadinstitute.org/gsea/msigdb/cards/REACTOME_MITOTIC_PROMETAPHASE	0.339867	0.377945	0.286685	0.0153511	-0.0675939	-0.153443	-0.168836	-0.48212	-0.33599	Activator group 1
CELL_CYCLE	Nup133	REACTOME_MITOTIC_PROMETAPHASE	http://www.broadinstitute.org/gsea/msigdb/cards/REACTOME_MITOTIC_PROMETAPHASE	0.347429	0.375756	0.37074	0.0554851	0.0730043	-0.00451766	-0.11813	-0.54331	-0.477941	Activator group 1
CELL_CYCLE	Pole2	REACTOME_S_PHASE	http://www.broadinstitute.org/gsea/msigdb/cards/REACTOME_S_PHASE	0.350696	0.402108	0.252334	0.0371305	-0.0808764	-0.0844831	-0.150426	-0.385566	-0.466756	Activator group 1
CELL_CYCLE	Mcm8	REACTOME_S_PHASE	http://www.broadinstitute.org/gsea/msigdb/cards/REACTOME_S_PHASE	0.351159	0.352016	0.197439	0.0120167	-0.0438647	-0.14222	-0.136305	-0.451485	-0.337874	Activator group 1
CELL_CYCLE	Nsl1	REACTOME_MITOTIC_PROMETAPHASE	http://www.broadinstitute.org/gsea/msigdb/cards/REACTOME_MITOTIC_PROMETAPHASE	0.35314	0.370141	0.201368	-0.0109195	-0.0487666	-0.177939	-0.129032	-0.451324	-0.312301	Activator group 1
CELL_CYCLE	Pold1	REACTOME_S_PHASE	http://www.broadinstitute.org/gsea/msigdb/cards/REACTOME_S_PHASE	0.355434	0.465297	0.327213	0.0242181	-0.103153	-0.122372	-0.144328	-0.437881	-0.372942	Activator group 1
CELL_CYCLE	Cdc6	REACTOME_S_PHASE	http://www.broadinstitute.org/gsea/msigdb/cards/REACTOME_S_PHASE	0.365626	0.428618	0.255628	-0.0419549	-0.0336192	-0.158695	-0.137732	-0.518322	-0.482835	Activator group 1
CELL_CYCLE	Rfc3	REACTOME_S_PHASE	http://www.broadinstitute.org/gsea/msigdb/cards/REACTOME_S_PHASE	0.365737	0.365615	0.275664	0.00234337	-0.0572525	-0.142572	-0.160658	-0.49573	-0.3586	Activator group 1
CELL_CYCLE	Cenpl	REACTOME_MITOTIC_PROMETAPHASE	http://www.broadinstitute.org/gsea/msigdb/cards/REACTOME_MITOTIC_PROMETAPHASE	0.372654	0.420403	0.327318	-0.0399524	-0.0280331	-0.172181	-0.170492	-0.480341	-0.479949	Activator group 1
CELL_CYCLE	Prim1	REACTOME_S_PHASE	http://www.broadinstitute.org/gsea/msigdb/cards/REACTOME_S_PHASE	0.37733	0.406066	0.306359	0.0169508	-0.0552106	-0.135821	-0.182282	-0.615215	-0.399238	Activator group 1
CELL_CYCLE	Rpa2	REACTOME_S_PHASE	http://www.broadinstitute.org/gsea/msigdb/cards/REACTOME_S_PHASE	0.37997	0.381133	0.280553	0.0341455	-0.0768077	-0.0866395	-0.155117	-0.460584	-0.375575	Activator group 1
CELL_CYCLE	Ccdc99	REACTOME_MITOTIC_PROMETAPHASE	http://www.broadinstitute.org/gsea/msigdb/cards/REACTOME_MITOTIC_PROMETAPHASE	0.393549	0.405873	0.259262	0.021556	-0.0391925	-0.102995	-0.198988	-0.469825	-0.406904	Activator group 1
CELL_CYCLE	Mcm6	REACTOME_S_PHASE	http://www.broadinstitute.org/gsea/msigdb/cards/REACTOME_S_PHASE	0.396504	0.423609	0.293903	-0.0168453	-0.10614	-0.132485	-0.172758	-0.494009	-0.402042	Activator group 1
CELL_CYCLE	Cenpm	REACTOME_MITOTIC_PROMETAPHASE	http://www.broadinstitute.org/gsea/msigdb/cards/REACTOME_MITOTIC_PROMETAPHASE	0.411421	0.388729	0.355638	0.0388735	0.0512648	-0.0586183	-0.101482	-0.679102	-0.594421	Activator group 1
CELL_CYCLE	Cenpi	REACTOME_MITOTIC_PROMETAPHASE	http://www.broadinstitute.org/gsea/msigdb/cards/REACTOME_MITOTIC_PROMETAPHASE	0.413708	0.412487	0.317253	0.0560444	-0.00911997	-0.105178	-0.0963637	-0.695964	-0.629643	Activator group 1
CELL_CYCLE	Pola1	REACTOME_S_PHASE	http://www.broadinstitute.org/gsea/msigdb/cards/REACTOME_S_PHASE	0.415244	0.45734	0.284567	-0.00249863	-0.163537	-0.178682	-0.202961	-0.595545	-0.286579	Activator group 1
CELL_CYCLE	Cks1b	REACTOME_S_PHASE	http://www.broadinstitute.org/gsea/msigdb/cards/REACTOME_S_PHASE	0.425317	0.555959	0.537952	0.150064	0.10752	-0.0197106	-0.19533	-0.846976	-0.766232	Activator group 1
CELL_CYCLE	Dbf4	REACTOME_MITOTIC_M_M_G1_PHASES	http://www.broadinstitute.org/gsea/msigdb/cards/REACTOME_MITOTIC_M_M_G1_PHASES	0.437344	0.53045	0.451848	0.154159	0.115555	-0.053403	-0.0910697	-0.852098	-0.988763	Activator group 1
CELL_CYCLE	Mcm4	REACTOME_S_PHASE	http://www.broadinstitute.org/gsea/msigdb/cards/REACTOME_S_PHASE	0.4378	0.441766	0.271238	0.0114364	-0.127447	-0.131057	-0.239806	-0.534038	-0.357362	Activator group 1
CELL_CYCLE	Mcm10	REACTOME_MITOTIC_M_M_G1_PHASES	http://www.broadinstitute.org/gsea/msigdb/cards/REACTOME_MITOTIC_M_M_G1_PHASES	0.460918	0.53124	0.399509	0.0989697	0.0659396	-0.121207	-0.0951547	-0.803758	-0.755815	Activator group 1
CELL_CYCLE	Cdt1	REACTOME_S_PHASE	http://www.broadinstitute.org/gsea/msigdb/cards/REACTOME_S_PHASE	0.461574	0.519022	0.386051	0.00644005	-0.0777519	-0.131931	-0.262595	-0.634394	-0.282578	Activator group 1
CELL_CYCLE	Lig1	REACTOME_S_PHASE	http://www.broadinstitute.org/gsea/msigdb/cards/REACTOME_S_PHASE	0.467127	0.465642	0.340903	0.00873312	-0.0807542	-0.120557	-0.145306	-0.571969	-0.511248	Activator group 1
CELL_CYCLE	Gins1	REACTOME_S_PHASE	http://www.broadinstitute.org/gsea/msigdb/cards/REACTOME_S_PHASE	0.468879	0.527587	0.433245	0.111757	0.0926149	-0.0864053	-0.12111	-0.915733	-0.777773	Activator group 1
CELL_CYCLE	Cdca8	REACTOME_MITOTIC_PROMETAPHASE	http://www.broadinstitute.org/gsea/msigdb/cards/REACTOME_MITOTIC_PROMETAPHASE	0.469377	0.607121	0.536198	0.1389	0.101692	-0.0697797	-0.181642	-0.963384	-0.876048	Activator group 1
CELL_CYCLE	Zwilch	REACTOME_MITOTIC_PROMETAPHASE	http://www.broadinstitute.org/gsea/msigdb/cards/REACTOME_MITOTIC_PROMETAPHASE	0.469448	0.564618	0.472216	0.0919632	0.0982601	-0.10681	-0.104571	-0.921752	-0.920974	Activator group 1
CELL_CYCLE	Kif23	REACTOME_MITOTIC_M_M_G1_PHASES	http://www.broadinstitute.org/gsea/msigdb/cards/REACTOME_MITOTIC_M_M_G1_PHASES	0.469737	0.511241	0.426793	0.0623693	0.0234677	-0.144719	-0.118864	-0.761698	-0.744318	Activator group 1
CELL_CYCLE	Ccnd1	REACTOME_S_PHASE	http://www.broadinstitute.org/gsea/msigdb/cards/REACTOME_S_PHASE	0.47099	0.582929	0.612578	0.164957	0.00360259	-0.0552669	-0.144459	-0.922016	-0.682937	Activator group 1
CELL_CYCLE	Gmnn	REACTOME_MITOTIC_M_M_G1_PHASES	http://www.broadinstitute.org/gsea/msigdb/cards/REACTOME_MITOTIC_M_M_G1_PHASES	0.474981	0.577997	0.480865	0.14691	0.0674899	-0.0419979	-0.166582	-0.898981	-0.639463	Activator group 1
CELL_CYCLE	Rrm2	REACTOME_MITOTIC_G1_G1_S_PHASES	http://www.broadinstitute.org/gsea/msigdb/cards/REACTOME_MITOTIC_G1_G1_S_PHASES	0.477534	0.493348	0.371445	0.0853033	0.0824256	-0.0715436	-0.104474	-0.786483	-0.87441	Activator group 1
CELL_CYCLE	Cdc25c	REACTOME_MITOTIC_G2_G2_M_PHASES	http://www.broadinstitute.org/gsea/msigdb/cards/REACTOME_MITOTIC_G2_G2_M_PHASES	0.478999	0.495986	0.500168	0.128837	0.0183159	-0.107302	-0.158953	-0.802406	-0.730939	Activator group 1
CELL_CYCLE	Cenph	REACTOME_MITOTIC_PROMETAPHASE	http://www.broadinstitute.org/gsea/msigdb/cards/REACTOME_MITOTIC_PROMETAPHASE	0.479279	0.501183	0.424497	0.0958793	0.0636555	-0.0821281	-0.120439	-0.776361	-0.719227	Activator group 1
CELL_CYCLE	Sgol2	REACTOME_MITOTIC_PROMETAPHASE	http://www.broadinstitute.org/gsea/msigdb/cards/REACTOME_MITOTIC_PROMETAPHASE	0.480845	0.522716	0.451257	0.109928	-0.00706258	-0.096303	-0.100031	-0.805287	-0.770888	Activator group 1
CELL_CYCLE	Cdc20	REACTOME_REGULATION_OF_MITOTIC_CELL_CYCLE	http://www.broadinstitute.org/gsea/msigdb/cards/REACTOME_REGULATION_OF_MITOTIC_CELL_CYCLE	0.481139	0.613385	0.562192	0.162613	0.161039	-0.0196668	-0.151355	-0.938711	-0.982363	Activator group 1
CELL_CYCLE	Ccne2	REACTOME_S_PHASE	http://www.broadinstitute.org/gsea/msigdb/cards/REACTOME_S_PHASE	0.481936	0.564798	0.458232	0.0448156	-0.0610989	-0.134414	-0.151003	-0.747194	-0.687521	Activator group 1
CELL_CYCLE	Ndc80	REACTOME_MITOTIC_PROMETAPHASE	http://www.broadinstitute.org/gsea/msigdb/cards/REACTOME_MITOTIC_PROMETAPHASE	0.484263	0.612199	0.432518	0.116711	0.0127388	-0.0997113	-0.127241	-0.847425	-0.881906	Activator group 1
CELL_CYCLE	Skp2	REACTOME_S_PHASE	http://www.broadinstitute.org/gsea/msigdb/cards/REACTOME_S_PHASE	0.487511	0.54568	0.492294	0.102068	0.0932087	-0.0846008	-0.122599	-0.848571	-0.844483	Activator group 1
CELL_CYCLE	Mcm2	REACTOME_S_PHASE	http://www.broadinstitute.org/gsea/msigdb/cards/REACTOME_S_PHASE	0.489466	0.60013	0.417092	0.117789	0.0858201	-0.0841054	-0.181054	-0.999795	-0.611654	Activator group 1
CELL_CYCLE	Dhfr	REACTOME_MITOTIC_G1_G1_S_PHASES	http://www.broadinstitute.org/gsea/msigdb/cards/REACTOME_MITOTIC_G1_G1_S_PHASES	0.492662	0.546067	0.487524	0.0868209	0.064356	-0.101693	-0.137652	-0.765342	-0.783444	Activator group 1
CELL_CYCLE	Cenpk	REACTOME_MITOTIC_PROMETAPHASE	http://www.broadinstitute.org/gsea/msigdb/cards/REACTOME_MITOTIC_PROMETAPHASE	0.496248	0.559608	0.464754	0.0714046	-0.00792123	-0.106772	-0.209571	-0.824397	-0.570841	Activator group 1
CELL_CYCLE	Sgol1	REACTOME_MITOTIC_PROMETAPHASE	http://www.broadinstitute.org/gsea/msigdb/cards/REACTOME_MITOTIC_PROMETAPHASE	0.496533	0.605975	0.506706	0.162617	0.0952248	-0.109322	-0.0790854	-0.954179	-1.0216	Activator group 1
CELL_CYCLE	Pole	REACTOME_S_PHASE	http://www.broadinstitute.org/gsea/msigdb/cards/REACTOME_S_PHASE	0.50037	0.571663	0.422624	0.0736639	-0.0263522	-0.112827	-0.158889	-0.85923	-0.682967	Activator group 1
CELL_CYCLE	Aurka	REACTOME_REGULATION_OF_MITOTIC_CELL_CYCLE	http://www.broadinstitute.org/gsea/msigdb/cards/REACTOME_REGULATION_OF_MITOTIC_CELL_CYCLE	0.500631	0.598037	0.487786	0.119652	0.0734598	-0.0808261	-0.145558	-0.913998	-0.781261	Activator group 1
CELL_CYCLE	Mcm3	REACTOME_S_PHASE	http://www.broadinstitute.org/gsea/msigdb/cards/REACTOME_S_PHASE	0.506904	0.509471	0.413172	0.136862	0.136861	-0.067718	-0.114279	-0.93251	-0.915547	Activator group 1
CELL_CYCLE	Ccnb1	REACTOME_REGULATION_OF_MITOTIC_CELL_CYCLE	http://www.broadinstitute.org/gsea/msigdb/cards/REACTOME_REGULATION_OF_MITOTIC_CELL_CYCLE	0.508089	0.578931	0.522135	0.191928	0.12765	-0.0687113	-0.10726	-1.0407	-1.06664	Activator group 1
CELL_CYCLE	Cenpa	REACTOME_MITOTIC_PROMETAPHASE	http://www.broadinstitute.org/gsea/msigdb/cards/REACTOME_MITOTIC_PROMETAPHASE	0.508704	0.57439	0.555542	0.145879	0.0952318	-0.0262148	-0.0991082	-0.917524	-0.933819	Activator group 1
CELL_CYCLE	Spc25	REACTOME_MITOTIC_PROMETAPHASE	http://www.broadinstitute.org/gsea/msigdb/cards/REACTOME_MITOTIC_PROMETAPHASE	0.509983	0.630836	0.540128	0.142907	0.0653291	-0.0719203	-0.125235	-0.933023	-0.916527	Activator group 1
CELL_CYCLE	Plk1	REACTOME_REGULATION_OF_MITOTIC_CELL_CYCLE	http://www.broadinstitute.org/gsea/msigdb/cards/REACTOME_REGULATION_OF_MITOTIC_CELL_CYCLE	0.516433	0.63341	0.554035	0.183921	0.0829432	0.011829	-0.176691	-0.912292	-0.903327	Activator group 1
CELL_CYCLE	Kif20a	REACTOME_MITOTIC_M_M_G1_PHASES	http://www.broadinstitute.org/gsea/msigdb/cards/REACTOME_MITOTIC_M_M_G1_PHASES	0.519326	0.640295	0.497686	0.109798	0.0721364	-0.108996	-0.173803	-0.981656	-0.920431	Activator group 1
CELL_CYCLE	Aurkb	REACTOME_REGULATION_OF_MITOTIC_CELL_CYCLE	http://www.broadinstitute.org/gsea/msigdb/cards/REACTOME_REGULATION_OF_MITOTIC_CELL_CYCLE	0.521234	0.566511	0.509187	0.12451	0.0861775	-0.0626332	-0.0838934	-0.915968	-0.918679	Activator group 1
CELL_CYCLE	Ccnb2	REACTOME_MITOTIC_G2_G2_M_PHASES	http://www.broadinstitute.org/gsea/msigdb/cards/REACTOME_MITOTIC_G2_G2_M_PHASES	0.524935	0.610804	0.551315	0.143609	0.115742	-0.0612459	-0.153992	-0.941387	-0.979967	Activator group 1
CELL_CYCLE	Mcm5	REACTOME_S_PHASE	http://www.broadinstitute.org/gsea/msigdb/cards/REACTOME_S_PHASE	0.532785	0.621859	0.498761	0.115803	0.0708964	-0.0779551	-0.208331	-0.991269	-0.818941	Activator group 1
CELL_CYCLE	Bub1b	REACTOME_REGULATION_OF_MITOTIC_CELL_CYCLE	http://www.broadinstitute.org/gsea/msigdb/cards/REACTOME_REGULATION_OF_MITOTIC_CELL_CYCLE	0.54224	0.629624	0.525014	0.165546	0.0488145	-0.0363401	-0.134499	-0.914448	-0.890514	Activator group 1
CELL_CYCLE	Kntc1	REACTOME_MITOTIC_PROMETAPHASE	http://www.broadinstitute.org/gsea/msigdb/cards/REACTOME_MITOTIC_PROMETAPHASE	0.547522	0.587422	0.471388	0.0496814	0.0664697	-0.097812	-0.135984	-0.932815	-0.795966	Activator group 1
CELL_CYCLE	Ccna2	REACTOME_S_PHASE	http://www.broadinstitute.org/gsea/msigdb/cards/REACTOME_S_PHASE	0.552353	0.655463	0.52383	0.179842	0.0460439	-0.0593575	-0.133047	-1.06382	-0.820501	Activator group 1
CELL_CYCLE	Fbxo5	REACTOME_REGULATION_OF_MITOTIC_CELL_CYCLE	http://www.broadinstitute.org/gsea/msigdb/cards/REACTOME_REGULATION_OF_MITOTIC_CELL_CYCLE	0.557667	0.624857	0.562931	0.0857973	0.0380088	-0.0566339	-0.115843	-0.878892	-0.810572	Activator group 1
CELL_CYCLE	Mad2l1	REACTOME_REGULATION_OF_MITOTIC_CELL_CYCLE	http://www.broadinstitute.org/gsea/msigdb/cards/REACTOME_REGULATION_OF_MITOTIC_CELL_CYCLE	0.557994	0.62496	0.55871	0.167257	0.133147	-0.0633438	-0.123707	-0.996515	-1.05622	Activator group 1
CELL_CYCLE	Ube2c	REACTOME_REGULATION_OF_MITOTIC_CELL_CYCLE	http://www.broadinstitute.org/gsea/msigdb/cards/REACTOME_REGULATION_OF_MITOTIC_CELL_CYCLE	0.56149	0.608905	0.552446	0.184588	0.123867	-0.00427941	-0.119097	-1.02361	-1.10213	Activator group 1
CELL_CYCLE	Spc24	REACTOME_MITOTIC_PROMETAPHASE	http://www.broadinstitute.org/gsea/msigdb/cards/REACTOME_MITOTIC_PROMETAPHASE	0.567174	0.65824	0.55345	0.0956009	0.0863969	-0.111204	-0.158193	-0.959896	-0.907653	Activator group 1
CELL_CYCLE	Nuf2	REACTOME_MITOTIC_PROMETAPHASE	http://www.broadinstitute.org/gsea/msigdb/cards/REACTOME_MITOTIC_PROMETAPHASE	0.574261	0.614516	0.535482	0.130505	0.0455377	-0.0859087	-0.156193	-0.932032	-0.906696	Activator group 1
CELL_CYCLE	Kif2c	REACTOME_MITOTIC_PROMETAPHASE	http://www.broadinstitute.org/gsea/msigdb/cards/REACTOME_MITOTIC_PROMETAPHASE	0.5835	0.654047	0.623434	0.137887	0.0767547	-0.0482413	-0.131443	-0.979654	-0.986072	Activator group 1
CELL_CYCLE	Birc5	REACTOME_MITOTIC_PROMETAPHASE	http://www.broadinstitute.org/gsea/msigdb/cards/REACTOME_MITOTIC_PROMETAPHASE	0.601711	0.649161	0.600583	0.12281	0.0764326	-0.0434	-0.162014	-0.971066	-0.958739	Activator group 1
CELL_CYCLE	Npm1	REACTOME_CELL_CYCLE	http://www.broadinstitute.org/gsea/msigdb/cards/REACTOME_CELL_CYCLE	0.0785582	0.158807	0.244932	0.172683	0.189082	0.0496771	-0.0911918	-0.471775	-0.429792	Activator group 1
CELL_CYCLE	Chek2	REACTOME_CELL_CYCLE	http://www.broadinstitute.org/gsea/msigdb/cards/REACTOME_CELL_CYCLE	0.138747	0.258836	0.241481	0.0660854	0.0817602	-0.068729	-0.00616502	-0.416894	-0.438448	Activator group 1
CELL_CYCLE	Ruvbl2	REACTOME_CELL_CYCLE	http://www.broadinstitute.org/gsea/msigdb/cards/REACTOME_CELL_CYCLE	0.139681	0.226731	0.152765	0.135875	0.130185	0.0156766	-0.0388089	-0.480868	-0.47121	Activator group 1
CELL_CYCLE	Espl1	KEGG_CELL_CYCLE	http://www.broadinstitute.org/gsea/msigdb/cards/KEGG_CELL_CYCLE	0.330679	0.322086	0.235202	0.00210288	-0.0467711	-0.105907	-0.106083	-0.455248	-0.431527	Activator group 1
CELL_CYCLE	H2afx	REACTOME_CELL_CYCLE	http://www.broadinstitute.org/gsea/msigdb/cards/REACTOME_CELL_CYCLE	0.369657	0.521244	0.477686	0.137458	0.132683	0.0157117	-0.119828	-0.829929	-0.836254	Activator group 1
CELL_CYCLE	Chek1	REACTOME_CELL_CYCLE	http://www.broadinstitute.org/gsea/msigdb/cards/REACTOME_CELL_CYCLE	0.420957	0.474131	0.285931	-0.0111503	-0.085727	-0.161525	-0.212294	-0.635259	-0.299083	Activator group 1
CELL_CYCLE	Ttk	KEGG_CELL_CYCLE	http://www.broadinstitute.org/gsea/msigdb/cards/KEGG_CELL_CYCLE	0.435347	0.442434	0.283597	-0.0182798	-0.0627162	-0.125162	-0.229079	-0.489104	-0.276721	Activator group 1
CELL_CYCLE	Ruvbl1	REACTOME_CELL_CYCLE_128	http://www.broadinstitute.org/gsea/msigdb/cards/REACTOME_CELL_CYCLE	0.280873	0.396485	0.275029	0.0190306	0.0168924	-0.100755	-0.251908	-0.441992	-0.284563	Activator group 1
CELL_CYCLE	Terf1	REACTOME_CELL_CYCLE_39	http://www.broadinstitute.org/gsea/msigdb/cards/REACTOME_CELL_CYCLE	0.295052	0.340875	0.246542	0.00335747	-0.064238	-0.103312	-0.0930279	-0.30484	-0.304113	Activator group 1
CELL_CYCLE	Brca1	BIOCARTA_G2_PATHWAY	http://www.broadinstitute.org/gsea/msigdb/cards/BIOCARTA_G2_PATHWAY	0.453567	0.560212	0.493846	0.109638	0.0539194	-0.0940445	-0.143792	-0.982952	-0.788095	Activator group 1
CELL_CYCLE	Cdkn2c	REACTOME_MITOTIC_G1_G1_S_PHASES	http://www.broadinstitute.org/gsea/msigdb/cards/REACTOME_MITOTIC_G1_G1_S_PHASES	0.214333	0.38395	0.200538	-0.0572482	-0.162086	-0.153695	-0.223769	-0.354016	0.0108346	Activator group 1
CELL_CYCLE	Pold3	REACTOME_S_PHASE	http://www.broadinstitute.org/gsea/msigdb/cards/REACTOME_S_PHASE	0.289292	0.335835	0.248529	-0.0323099	-0.0659625	-0.154515	-0.152073	-0.268092	-0.20756	Activator group 1
CELL_CYCLE	Kif18a	REACTOME_MITOTIC_PROMETAPHASE	http://www.broadinstitute.org/gsea/msigdb/cards/REACTOME_MITOTIC_PROMETAPHASE	0.350936	0.369847	0.308097	0.00799818	-0.155717	-0.159037	-0.157086	-0.453075	-0.3753	Activator group 1
CELL_CYCLE	Nup107	REACTOME_MITOTIC_PROMETAPHASE	http://www.broadinstitute.org/gsea/msigdb/cards/REACTOME_MITOTIC_PROMETAPHASE	0.375218	0.386499	0.252375	-0.0552726	-0.0740973	-0.147587	-0.137373	-0.37009	-0.33572	Activator group 1
CELL_CYCLE	Cdkn2d	REACTOME_MITOTIC_G1_G1_S_PHASES	http://www.broadinstitute.org/gsea/msigdb/cards/REACTOME_MITOTIC_G1_G1_S_PHASES	0.376483	0.305897	0.194112	-0.070858	-0.0559359	-0.116953	-0.183402	-0.230174	-0.285554	Activator group 1
CELL_CYCLE	Pkmyt1	REACTOME_MITOTIC_G2_G2_M_PHASES	http://www.broadinstitute.org/gsea/msigdb/cards/REACTOME_MITOTIC_G2_G2_M_PHASES	0.377759	0.333717	0.148724	-0.0768681	-0.181831	-0.137823	-0.215265	-0.298936	-0.16567	Activator group 1
CELL_CYCLE	Cdc7	REACTOME_MITOTIC_M_M_G1_PHASES	http://www.broadinstitute.org/gsea/msigdb/cards/REACTOME_MITOTIC_M_M_G1_PHASES	0.378778	0.477095	0.254364	-0.0467276	-0.121962	-0.20601	-0.219762	-0.563173	-0.33537	Activator group 1
CELL_CYCLE	E2f1	REACTOME_MITOTIC_M_M_G1_PHASES	http://www.broadinstitute.org/gsea/msigdb/cards/REACTOME_MITOTIC_M_M_G1_PHASES	0.38289	0.430733	0.180303	-0.0897333	-0.337059	-0.0824264	-0.183958	-0.248177	-0.0569676	Activator group 1
CELL_CYCLE	Cdk2	REACTOME_S_PHASE	http://www.broadinstitute.org/gsea/msigdb/cards/REACTOME_S_PHASE	0.402984	0.410653	0.255385	-0.0666554	-0.0398389	-0.196832	-0.282039	-0.484165	-0.317768	Activator group 1
CELL_CYCLE	Cep192	REACTOME_MITOTIC_G2_G2_M_PHASES	http://www.broadinstitute.org/gsea/msigdb/cards/REACTOME_MITOTIC_G2_G2_M_PHASES	0.427072	0.400941	0.17383	-0.128844	-0.10299	-0.222013	-0.223914	-0.386431	-0.14756	Activator group 1
CELL_CYCLE	Prim2	REACTOME_S_PHASE	http://www.broadinstitute.org/gsea/msigdb/cards/REACTOME_S_PHASE	0.445787	0.401669	0.353298	-0.0377254	-0.128249	-0.125526	-0.151402	-0.388105	-0.329716	Activator group 1
CELL_CYCLE	Cdc25b	REACTOME_S_PHASE	http://www.broadinstitute.org/gsea/msigdb/cards/REACTOME_S_PHASE	0.437798	0.380217	-0.0243371	-0.2283	-0.30798	-0.242909	-0.328146	0.00834762	0.053859	Activator group 2
CELL_CYCLE	Rfc2	REACTOME_S_PHASE	http://www.broadinstitute.org/gsea/msigdb/cards/REACTOME_S_PHASE	0.38454	0.397662	0.256768	-0.135789	-0.21369	-0.148894	-0.189987	-0.194016	0.0334351	Activator group 2
CELL_CYCLE	Cdkn1c	KEGG_CELL_CYCLE	http://www.broadinstitute.org/gsea/msigdb/cards/KEGG_CELL_CYCLE	0.417883	0.36614	-0.0568655	-0.242063	-0.445034	-0.304698	-0.348409	0.0693867	-0.0179754	Activator group 2
CELL_CYCLE	Tgfb3	KEGG_CELL_CYCLE	http://www.broadinstitute.org/gsea/msigdb/cards/KEGG_CELL_CYCLE	0.432666	0.418155	-0.0806011	-0.452553	-0.517891	-0.355112	-0.408079	0.270183	0.397477	Activator group 2
CELL_CYCLE	Clip1	REACTOME_MITOTIC_PROMETAPHASE	http://www.broadinstitute.org/gsea/msigdb/cards/REACTOME_MITOTIC_PROMETAPHASE	-0.053164	-0.134133	-0.160616	-0.0524077	-0.109789	-0.0292351	-0.0620821	0.466153	0.466187	Activator group 2
CELL_CYCLE	Ccnd3	REACTOME_MITOTIC_G1_G1_S_PHASES	http://www.broadinstitute.org/gsea/msigdb/cards/REACTOME_MITOTIC_G1_G1_S_PHASES	-0.0270223	-0.0947437	-0.238761	-0.340474	-0.335403	-0.192792	-0.0751601	0.510247	0.726707	Activator group 2
CELL_CYCLE	Psmb9	REACTOME_S_PHASE	http://www.broadinstitute.org/gsea/msigdb/cards/REACTOME_S_PHASE	0.0383099	0.111078	-0.266579	-0.336255	-0.424593	-0.182642	-0.0934529	0.490668	1.01792	Activator group 2
CELL_CYCLE	Ube2d1	REACTOME_REGULATION_OF_MITOTIC_CELL_CYCLE	http://www.broadinstitute.org/gsea/msigdb/cards/REACTOME_REGULATION_OF_MITOTIC_CELL_CYCLE	0.196514	0.17484	-0.00190663	-0.217183	-0.255903	-0.131843	-0.243065	0.203241	0.499174	Activator group 2
CELL_CYCLE	Ppp2r5c	REACTOME_MITOTIC_PROMETAPHASE	http://www.broadinstitute.org/gsea/msigdb/cards/REACTOME_MITOTIC_PROMETAPHASE	0.200225	0.114829	-0.0445141	-0.171889	-0.190085	-0.166461	-0.237436	0.210985	0.367936	Activator group 2
CELL_CYCLE	Pcnt	REACTOME_MITOTIC_G2_G2_M_PHASES	http://www.broadinstitute.org/gsea/msigdb/cards/REACTOME_MITOTIC_G2_G2_M_PHASES	0.208416	0.15867	0.0391297	-0.216837	-0.249777	-0.135837	-0.205952	0.171377	0.364079	Activator group 2
CELL_CYCLE	Wee1	REACTOME_S_PHASE	http://www.broadinstitute.org/gsea/msigdb/cards/REACTOME_S_PHASE	0.210121	0.136449	-0.124124	-0.183479	-0.296564	-0.19533	-0.199926	0.133141	0.487105	Activator group 2
CELL_CYCLE	Btrc	REACTOME_REGULATION_OF_MITOTIC_CELL_CYCLE	http://www.broadinstitute.org/gsea/msigdb/cards/REACTOME_REGULATION_OF_MITOTIC_CELL_CYCLE	0.221354	0.141264	-0.169618	-0.270071	-0.308471	-0.174376	-0.135271	0.163823	0.350025	Activator group 2
CELL_CYCLE	Nedd1	REACTOME_MITOTIC_G2_G2_M_PHASES	http://www.broadinstitute.org/gsea/msigdb/cards/REACTOME_MITOTIC_G2_G2_M_PHASES	0.239552	0.278106	0.00849653	-0.184246	-0.234488	-0.217316	-0.238093	-0.0183385	0.225519	Activator group 2
CELL_CYCLE	Prkar2b	REACTOME_MITOTIC_G2_G2_M_PHASES	http://www.broadinstitute.org/gsea/msigdb/cards/REACTOME_MITOTIC_G2_G2_M_PHASES	0.245038	0.178087	-0.00983218	-0.206656	-0.236486	-0.224553	-0.24612	0.14912	0.353635	Activator group 2
CELL_CYCLE	Xpo1	REACTOME_MITOTIC_PROMETAPHASE	http://www.broadinstitute.org/gsea/msigdb/cards/REACTOME_MITOTIC_PROMETAPHASE	0.272323	0.376103	0.0901439	0.00544627	-0.149664	-0.140314	-0.145079	-0.465213	-0.233775	Activator group 2
CELL_CYCLE	Cdk6	REACTOME_MITOTIC_G1_G1_S_PHASES	http://www.broadinstitute.org/gsea/msigdb/cards/REACTOME_MITOTIC_G1_G1_S_PHASES	0.314766	0.273005	0.00745886	-0.216053	-0.299891	-0.141536	-0.256363	0.0374045	0.207507	Activator group 2
CELL_CYCLE	Cdc14b	KEGG_CELL_CYCLE	http://www.broadinstitute.org/gsea/msigdb/cards/KEGG_CELL_CYCLE	0.212479	0.175509	-0.118033	-0.307956	-0.339262	-0.22202	-0.246024	0.258874	0.58397	Activator group 2
CELL_CYCLE	Lmna	REACTOME_CELL_CYCLE	http://www.broadinstitute.org/gsea/msigdb/cards/REACTOME_CELL_CYCLE	0.236373	0.195674	-0.0448717	-0.237574	-0.248075	-0.11225	-0.212086	0.234145	0.373192	Activator group 2
CELL_CYCLE	Hist1h4h	REACTOME_CELL_CYCLE_111	http://www.broadinstitute.org/gsea/msigdb/cards/REACTOME_CELL_CYCLE	0.15503	0.158816	-0.036965	-0.226335	-0.201356	-0.169978	-0.217795	0.20582	0.37491	Activator group 2
CELL_CYCLE	Hist2h2be	REACTOME_CELL_CYCLE_103	http://www.broadinstitute.org/gsea/msigdb/cards/REACTOME_CELL_CYCLE	0.338845	0.373895	0.228304	-0.141264	-0.307058	-0.237883	-0.273004	-0.0368167	0.192366	Activator group 2
