# Supplementary material for: A multi-scale model for hair follicles reveals heterogeneous domains driving rapid spatiotemporal hair growth patterning
Source: eLife. 2017 Jul 11;6:e22772. doi: 10.7554/eLife.22772 (PMC5610035; doi:10.7554/eLife.22772)
Supplement: Supplementary file 2. — Genes are grouped into individual tabs based on (i) their activator or inhibitor expression profile and (ii) their specificity to one or several skin domains. DOI: http://dx.doi.org/10.7554/eLife.22772.011 [file elife-22772-supp2.xlsx]

## Sheet: Sample definition
Sample definition	Abbreviation
Chin, Competent telogen	CCT
Chin, Early anagen	CEA
Chin, Mid-anagen	CMA
Chin, Late anagen	CLA
Chin, Catagen	CC
Chin, Refractory telogen	CRT
Ventral, Competent telogen	VCT
Ventral, Early anagen	VEA
Ventral, Mid-anagen	VMA
Ventral, Late anagen	VLA
Ventral, Catagen	VC
Ventral, Refractory telogen	VRT
Dorsal, Competent telogen	DCT
Dorsal, Early anagen	DEA
Dorsal, Mid-anagen	DMA
Dorsal, Late anagen	DLA
Dorsal, Catagen	DC
Dorsal, Refractory telogen	DRT

## Sheet: Activator, Shared
Gene_ID	Gene_Name	CCT1	CCT2	CEA1	CEA2	CMA1	CMA2	CLA1	CLA2	CC1	CC2	CC3	CRT1	CRT2	CRT3	VCT1	VCT2	VCT3	VEA1	VEA2	VEA3	VMA1	VMA2	VLA1	VLA2	VLA3	VC1	VC2	VRT2	VRT1	DCT1	DCT2	DEA1	DEA2	DMA1	DMA2	DMA3	DLA1	DLA2	DLA3	DC2	DC1	DRT2	DRT1	mean.CCT	mean.CEA	mean.CMA	mean.CLA	mean.CC
ENSMUSG00000040761.16	Spen	3.78	3.61	4.28	3.46	2.68	2.98	2.6	2.35	2.89	2.61	2.52	4.18	2.75	2.61	4.27	3.6	2.21	3.61	3.34	4.25	2.75	2.12	3.1	2.68	3.38	3.05	2.71	2.4	2.39	2.36	2.66	2.34	3.16	3.21	2.53	2.1	2.47	1.85	2.09	1.98	1.99	2.95	2.6	3.695	3.87	2.83	2.475	2.67333
ENSMUSG00000018428.15	Akap1	6.82	5.9	5.49	5.55	3.74	4.63	3.58	3.83	3.66	3.42	3.61	5.49	4.23	5.44	6.62	6.84	5.07	5.05	4.75	4.6	3.06	3.61	3.39	3.61	3.98	3.67	3.91	3.03	4.67	3.71	3.68	8.18	7.05	4.51	4.45	4.87	3.94	4.84	5.43	5.87	5.25	3.43	3.15	6.36	5.52	4.185	3.705	3.56333
ENSMUSG00000068250.13	Amn1	11.57	10.9	12.65	11.7	10.95	8.43	11.27	7.11	11.4	8.03	10.63	11.14	9.97	11.29	15.13	11.82	11.48	13.56	9.41	12.21	9.48	8.22	12.4	8.75	8.06	9.5	10.53	13.53	15.33	8.82	6.09	14.78	13.85	10.86	15.56	11.04	11.46	11.65	10.3	9.11	9.07	8.74	8.35	11.235	12.175	9.69	9.19	10.02
ENSMUSG00000036986.16	Pml	2.54	2.88	3.23	2.44	2.28	2.44	2.09	2.1	2.85	2.51	2.23	3.07	2.62	3.54	4.41	2.67	3.48	3.15	3.25	3.61	2.21	2.56	2.1	2.65	2.33	2.75	2.82	1.92	2.76	1.94	2.33	4.43	4.18	2.66	2.7	2.79	2.35	2.49	2.76	2.06	2.33	2.1	2.88	2.71	2.835	2.36	2.095	2.53
ENSMUSG00000004568.12	Arhgef18	4.41	3.38	3.59	3.44	1.62	2.43	2	2.16	3.3	1.89	2.38	4.48	3.91	4.27	4.08	4.48	3.36	4.56	4.39	4.42	1.52	2.12	2.59	2.51	3.02	1.97	2.27	2.37	2.95	2.05	2.36	3.33	3.23	2.53	2.05	2.5	2.4	2.77	2.52	2.54	1.97	3.02	3.42	3.895	3.515	2.025	2.08	2.52333
ENSMUSG00000068876.14	Cgn	27.42	26.73	26.34	25.07	30.44	30.69	13.26	14.07	19.92	17.06	17.51	39.2	66.18	39.6	45.35	40.43	38.41	44.35	45.85	46.39	35.97	31.74	22.99	22.92	23.27	16.31	18.76	29.25	30.43	12.94	14.11	22.15	22.05	22.64	21.5	23.97	26.48	24.92	24.59	11.63	10.29	27.48	26.38	27.075	25.705	30.565	13.665	18.1633
ENSMUSG00000057614.6	Gnai1	23.3	19.85	17.26	15.88	15.69	15.94	8.71	7.75	10.7	10.62	11.74	33.45	31.26	33.19	21.5	23.65	20.74	24.94	24.84	25.56	20.62	14.26	12.01	11.74	10.18	8.52	8.15	14.06	25	9.63	9	15.59	15.62	9.41	9.54	10.61	12.67	12.97	13.42	9.18	10.9	17.1	18.18	21.575	16.57	15.815	8.23	11.02
ENSMUSG00000029478.16	Ncor2	8.63	7.21	8.28	9.19	5.95	6.33	6.4	6.42	6.43	6.44	6.85	9.33	7.91	9.23	9.48	7.64	6.62	10.56	11.25	13.36	5.83	7.09	6.37	7.49	6.58	7.49	6.53	5.62	10.43	7.82	6.86	9.12	6.88	6.91	5.72	5.24	6.3	6.96	7.44	3.11	2.92	8.86	8.65	7.92	8.735	6.14	6.41	6.57333
ENSMUSG00000023047.10	Amhr2	1.01	0.5	0.65	2.61	0.41	0.69	1.07	0.97	0.85	1.72	0.87	5.45	1.39	3.3	3.74	4.66	1.94	0.11	0.77	1.49	0.26	0.24	0.3	0.5	0.2	0	0.87	1.71	0.83	0.92	1.1	2.29	3.72	0.53	0.49	1	0.33	0.41	0.4	1.32	0.05	0.99	0.87	0.755	1.63	0.55	1.02	1.14667
ENSMUSG00000052957.7	Gas1	68.63	52.78	54.61	52.63	59.27	53.8	46.77	46.93	34.5	37.01	35.76	145.89	139.38	143.24	91.87	113.7	81.36	118.37	120.35	105.33	69.17	75.85	54.46	55.94	51.46	34.08	30.52	93.75	127.57	50.83	50.18	62.85	63.87	34.33	37.91	32.83	36.8	38.58	42.51	20.5	16.93	100.5	104.77	60.705	53.62	56.535	46.85	35.7567
ENSMUSG00000054555.11	Adam12	0.56	0.85	0.95	0.48	0.67	0.51	0.49	0.29	0.47	0.37	0.56	0.81	0.5	0.9	0.98	1.68	0.89	0.85	0.95	1.17	0.87	0.54	0.19	0.16	0.67	0.97	0.38	0.6	1.16	0.5	0.42	1.46	0.79	0.54	0.18	0.52	0.35	0.27	0.34	0.41	0.58	0.52	0.18	0.705	0.715	0.59	0.39	0.466667
ENSMUSG00000021278.6	Amn	0.49	0.63	0.99	0.51	0.15	0.1	0.09	0.36	0.2	0.44	0	0.82	0.99	1.21	1.57	1.58	1.61	1.04	1.26	1.61	0.7	0.79	0.21	0.19	0.4	0.08	0.24	0.51	1.04	0.17	0.16	0.81	1.08	0.32	0.14	0.34	0.25	0.36	0.21	0.19	0.19	0.29	0.39	0.56	0.75	0.125	0.225	0.213333
ENSMUSG00000022687.11	Boc	5.78	4.81	5.06	3.86	2.85	2.57	2.14	2.41	3.05	2.77	3.01	6.11	5.3	5.72	6.85	6.81	5.62	4.92	5.59	5.46	3.4	3.95	3.75	4.01	3.54	3.16	2.99	3.52	3.8	2.26	2.29	6.2	5.94	3.72	4.55	3.94	3.93	3.73	3.76	3.44	4.58	3.32	3.99	5.295	4.46	2.71	2.275	2.94333
ENSMUSG00000053819.16	Camk2d	19.38	16.2	22.52	13.48	8.16	17.22	8.44	8.02	9.76	9.31	9.59	19.26	17.77	22.74	13.59	16.95	14.01	20.21	18.7	18.16	9.75	8.27	8.82	8.7	9.36	9.04	8.55	8.94	16.08	10.24	8.93	14.81	15.94	7.97	9.58	9.58	8.73	9.54	9.26	9.39	9.09	15.69	15.19	17.79	18	12.69	8.23	9.55333
ENSMUSG00000038119.14	Cdon	1.8	1.2	1.71	1.07	0.49	0.76	0.67	0.72	0.45	0.54	0.43	1.83	1.61	2.18	1.02	1.12	1.1	1.87	1.85	1.28	0.6	0.36	0.68	0.8	0.66	0.7	0.76	1.26	1.4	0.77	0.9	0.9	1.99	0.69	0.65	0.76	0.66	0.76	0.64	1.34	1.5	1.07	1.28	1.5	1.39	0.625	0.695	0.473333
ENSMUSG00000030792.7	Dkkl1	126.28	107.33	87.46	62.03	30.64	70.04	32.37	28.59	31.02	42.23	40.11	100.53	109.74	98.47	90.93	77.31	76.45	109.77	121.1	118.97	40.65	33.48	53.85	54.85	55.2	21.88	22.81	116.35	82.65	31.62	33.43	71.53	68.14	43.59	42.79	41.59	51.72	50.21	49.14	21.95	23.7	75.78	86.41	116.805	74.745	50.34	30.48	37.7867
ENSMUSG00000026825.17	Dnm1	2.18	2.59	2.61	2.5	1.58	2.43	2.27	2.17	0.89	1.36	0.57	6.4	4.07	4.47	5.6	3.42	4.29	2.52	3.48	2.87	2.23	2.03	1.47	0.68	1.04	1.42	1.96	2.64	4.14	2.38	2.84	4.43	3.05	1.14	0.96	1.34	1.5	1.48	1.47	1.28	1.64	1.71	1.86	2.385	2.555	2.005	2.22	0.94
ENSMUSG00000029603.15	Dtx1	0.57	0.84	1.67	0.45	0.25	0.32	0.48	0.35	0.45	0.3	0.54	1.14	1.06	1.03	1.35	1.13	1.22	2.07	2.01	1.12	0.94	0.54	0.62	0.94	0.6	0.56	0.28	1.41	0.58	0.51	0.44	0.67	0.78	0.63	0.51	0.28	0.47	0.5	0.55	0.46	0.82	1	0.9	0.705	1.06	0.285	0.415	0.43
ENSMUSG00000040415.15	Dtx3	10.98	13.8	16.88	16.86	12.19	10.28	7.88	9.93	11.14	8.58	9.11	18.88	14.41	17.29	20.86	15.4	18.83	16.45	12.69	15.64	9.8	8.69	8.76	7.8	10.72	13.8	14.67	6.46	12.96	11.3	9.02	18.45	17.1	11.6	12.08	10.33	9.4	9.56	9.99	2.06	2.69	13.5	13	12.39	16.87	11.235	8.905	9.61
ENSMUSG00000055024.12	Ep300	4.47	4.43	5.33	3.92	2.18	4.96	3.21	3.89	3.59	5.26	3.14	3.96	4.78	5.07	2.4	2.68	2.42	3.74	5.42	3.93	2.26	1.71	2.77	3.11	3.24	4.17	2.71	3.08	3.8	3.03	2.62	3.56	4.16	3.29	4.17	2.39	2.09	1.94	1.76	3.22	3.31	3.79	3.74	4.45	4.625	3.57	3.55	3.99667
ENSMUSG00000030849.17	Fgfr2	51.36	42.11	44.97	43.93	32.37	31.92	20.03	21.71	25.33	24.71	24.85	34.35	29.8	35.53	47.9	53.79	43.44	40.14	37.24	35.01	25.7	30.44	31.36	32.2	30.18	24.43	29.66	20.3	42.57	21.36	25.2	59.19	59.27	27.79	31.49	29.95	30.34	29.15	29.66	39.57	36.16	33.96	35.03	46.735	44.45	32.145	20.87	24.9633
ENSMUSG00000020357.3	Flt4	0.51	0.62	0.77	0.96	0.55	0.29	0.47	0.58	0.49	0.63	0.51	1.96	0.76	1.71	2.88	2.41	2.87	1.85	1.87	2.25	1.91	2.24	0.53	0.45	0.6	0.36	0.76	0.87	0.88	0.43	0.53	1.8	1.46	0.76	0.36	0.68	0.53	0.74	0.52	0.39	0.32	0.77	0.93	0.565	0.865	0.42	0.525	0.543333
ENSMUSG00000021250.13	Fos	135.49	114.09	133.92	187.28	22.81	23.22	37.99	33.82	34.96	40.81	38.9	232	357.92	226.52	196.77	228.42	170.99	186.91	193.05	186.67	17.76	17.08	79.04	86.43	85.33	44.75	39.9	163.91	151.65	35.45	36.48	251.31	245.51	73.71	76.59	68.71	69.86	65.6	66.49	48.38	52.02	139.23	147.12	124.79	160.6	23.015	35.905	38.2233
ENSMUSG00000041075.8	Fzd7	12.77	12.99	10.7	10.99	6.31	7.53	6.21	5.54	6.04	7.94	6.49	7.88	7.25	8.18	9.18	10.06	8.51	10.6	11.13	10.73	5.65	6.55	8.61	7.65	6.58	6.33	6.15	4.83	7	6.88	5.58	11.45	12.22	7.3	6.81	7.57	8.04	7.18	7.3	10.08	11.56	7.84	7.85	12.88	10.845	6.92	5.875	6.82333
ENSMUSG00000074934.3	Grem1	7.9	7.48	4.49	3.91	2.46	4.61	1.6	1.37	1.59	1.53	1.82	8.86	6.56	9.43	4.25	3.86	3.72	3.53	3.68	3.42	2.56	1.96	2.78	3.81	2.72	1.62	1.55	5.72	3.65	1.46	1.33	4.43	3.44	2.05	1.57	1.57	2.5	2.12	2.4	2	2.58	3.73	4.43	7.69	4.2	3.535	1.485	1.64667
ENSMUSG00000031161.15	Hdac6	2.7	3.63	3.11	2.53	1.25	1.83	2.75	2.26	3.37	3.17	3.06	3.18	2.81	2.9	3.91	3.56	3.41	3.64	3.37	3.13	1.94	2.78	3.25	2.69	2.79	2.87	2.59	1.47	2.55	2.29	3.07	5.31	3.34	3.54	3.42	3.22	3.03	2.83	3.07	2.27	2.29	2.21	2.48	3.165	2.82	1.54	2.505	3.2
ENSMUSG00000022475.18	Hdac7	10.75	10.71	13.55	8.89	4.99	8.8	6	8.67	4.78	4.16	5.72	13.89	11.22	12.67	11.95	10.69	8.62	12.7	14.62	12.1	5.8	5.57	6.24	7.09	7.19	4.85	6.33	9.09	12.24	7.32	7.67	10.42	9.26	6.64	6.13	5.05	7.5	6.07	6.41	9.65	9.04	10.06	8.99	10.73	11.22	6.895	7.335	4.88667
ENSMUSG00000040289.8	Hey1	2.64	2.62	1.9	3.11	0.98	1.12	1.22	1.05	1.42	1.39	1.45	2.84	2.12	2.66	2.77	3.1	3.11	3.97	4.53	4.97	1.96	1.57	1.25	1.41	1.15	0.97	1.21	2.52	3.62	1.25	1.02	2.08	2.33	1.15	1.16	1.41	1.3	1.09	1.67	3.27	2.87	2.22	2.04	2.63	2.505	1.05	1.135	1.42
ENSMUSG00000027598.16	Itch	15.69	14.44	20.87	15.35	13.55	13.6	10.55	11.57	13.27	14.54	11.88	11.4	12.36	12.84	12.7	13.7	12	13.45	11.58	10.41	7.38	6.89	10.9	10.28	11.08	13.71	13.64	7.01	10.78	13.24	11.92	16.37	14.55	12.87	12.58	12.86	12.87	11.84	9.75	13.32	12.49	11.95	11.81	15.065	18.11	13.575	11.06	13.23
ENSMUSG00000002799.5	Jag2	10.42	9.01	7.9	8.76	7.07	6.82	4.93	3.91	5.29	4.94	4.42	9.15	9.24	8.22	11.75	11.73	9.6	8.21	10.52	9.47	5.88	5.91	6.09	6.66	6.74	6.76	5.1	5.8	5.56	4.47	4.04	8.83	7.3	5.9	6.39	5.22	5.51	5.07	5.64	2.08	2.05	6.14	7.18	9.715	8.33	6.945	4.42	4.88333
ENSMUSG00000024913.16	Lrp5	1.95	2.59	3.5	2.35	1.41	1.5	1.51	1.75	2.17	1.25	1.38	2.02	2	2.07	2.88	2.56	2.44	3.15	2.47	1.82	1.25	1.13	1.6	1.56	2.23	1.74	2.15	0.65	5.58	1.34	1.54	2.17	2.11	1.46	2.34	2.37	1.94	2.18	1.62	1.05	0.65	2.3	2.3	2.27	2.925	1.455	1.63	1.6
ENSMUSG00000001870.15	Ltbp1	10.11	10.99	14.01	12.84	5.69	8.52	4.95	5.42	8.5	7.82	11.23	14.15	10.62	14.8	15.71	12.32	17.17	14.7	12.47	12.76	7.73	6.43	5.02	4.45	5.76	6.81	5.16	6.56	5.6	3.89	6.06	14.76	12.42	13.88	10.37	6.72	7.17	6.95	6.99	8.82	9.57	10.72	8.62	10.55	13.425	7.105	5.185	9.18333
ENSMUSG00000017737.2	Mmp9	2.26	1.81	1.77	1.88	0.77	2.15	1.8	1.75	0.69	1.24	0.77	3.74	2.96	3.86	2.28	1.99	2.18	2.59	1.82	2.19	0.96	1.53	1.23	1.69	1.73	0.61	1.23	3.54	2.26	1.3	1.84	1.56	1.24	1.09	0.7	0.97	1.45	1.62	1.01	1.02	1.32	2.28	2.13	2.035	1.825	1.46	1.775	0.9
ENSMUSG00000024589.15	Nedd4l	1.7	1.55	1.65	1.55	1.17	1.33	1.23	0.83	1.02	1.21	1.03	1.9	1.83	1.92	1.76	1.65	1.71	1.94	2.16	2.5	1.28	1.39	1.06	1.21	1.53	1.18	1.13	1.22	1.24	1.01	0.95	1.64	2.06	1.67	1.46	1.62	1.2	1.51	1.21	1.52	1.79	1.49	1.16	1.625	1.6	1.25	1.03	1.08667
ENSMUSG00000033016.15	Nfatc1	12.77	13.61	11.03	8.99	4.27	5.01	3.76	3.87	4.03	3.75	3.56	20.99	15.55	21.56	12.87	13.81	10.95	22.78	22.97	21.78	4.62	4.56	4.95	4.54	4.45	2.68	3.32	6.43	8.33	3.8	4.31	16.48	14.89	5.03	5.61	4.09	4.64	4.85	4.46	3.52	3.21	8.84	8.52	13.19	10.01	4.64	3.815	3.78
ENSMUSG00000023411.11	Nfatc4	1.36	1.39	1.58	1.59	0.61	0.97	1.23	1.18	0.4	0.55	0.42	2.74	1.59	2.03	3.03	2.54	2.35	1.34	1.55	1.66	1.2	0.8	0.34	0.58	0.6	0.53	0.6	1.51	1.66	1.18	1.04	2.08	2.12	0.47	0.47	0.4	0.55	0.87	0.63	0.35	0.64	0.91	1.07	1.375	1.585	0.79	1.205	0.456667
ENSMUSG00000021948.15	Prkcd	29.94	27.18	30.87	29.11	20.96	26.95	16.08	16.42	20.13	21.42	17.14	38.11	43.25	35.9	43.04	34.51	34.63	34.46	33.06	33.06	22.11	18.55	24.52	19.4	21.05	19.88	21.19	16.91	22.35	17.29	16.67	31.78	31.16	19.45	19.49	18.3	22.52	21.82	22.42	16.21	17.51	24.14	28.58	28.56	29.99	23.955	16.25	19.5633
ENSMUSG00000029053.16	Prkcz	10.71	8.66	9.74	11.18	9.25	11.39	7.43	8.44	7.45	10.01	10.23	11.07	14.49	9.44	12	8.32	11.23	12.03	14.95	13.1	6.76	8.66	7.6	7.73	9.22	9.5	11.84	7.57	6.95	6.63	8.11	14.77	9.6	8.82	9.54	7.29	8.39	9.18	10.69	9.7	11.97	9.84	10.17	9.685	10.46	10.32	7.935	9.23
ENSMUSG00000025314.16	Ptprj	0.87	1.1	0.71	1.36	0.7	0.56	0.59	0.64	0.72	0.81	0.6	1.4	1.01	2.01	0.88	1.12	0.98	1.19	1.31	1.21	0.79	0.68	0.58	0.59	0.46	0.62	0.71	0.64	0.72	0.74	1.01	1.38	0.9	0.74	0.91	0.97	1.66	0.72	0.81	0.8	0.5	0.57	1.13	0.985	1.035	0.63	0.615	0.71
ENSMUSG00000039191.12	Rbpj	9.62	9.23	9.68	7.91	5.61	6.97	7.74	10.29	7.42	7.67	7.91	9.66	6.89	9	7.32	8.83	9.19	9.02	8.1	8.36	4.91	4.89	6.6	6.32	6.01	8.66	8.51	6.29	7.15	8.82	8.93	9.15	11.03	7.3	7.8	7.68	6.7	6.76	7.01	10.52	9.22	6.79	6.33	9.425	8.795	6.29	9.015	7.66667
ENSMUSG00000048027.7	Rgmb	22.09	20.28	16.33	16.15	8.51	10.78	6.99	7.57	7.02	7.75	7.07	17.73	17.52	20.65	24.64	24.35	21.97	22.59	22.81	21.65	14.51	14.09	10.76	10.15	10.77	8.08	8.15	6.74	14.81	7.39	7.69	18.59	19.25	8.3	9.41	8.97	10.74	10.28	11.03	6.66	7.9	11.93	14.13	21.185	16.24	9.645	7.28	7.28
ENSMUSG00000042557.14	Sin3a	5.3	7.05	7.21	6.36	3.07	8.35	5.14	3.78	4.16	4.67	4.31	5.68	4.55	4.97	6.46	5.48	6.08	8.61	5.68	5.94	2.65	3.83	4.64	5.02	3.79	4.29	6.68	2.85	4.27	3.96	3.58	8.73	10.51	4.3	5.98	3.86	4.35	5.95	5.02	6.21	8.29	4.5	3.82	6.175	6.785	5.71	4.46	4.38
ENSMUSG00000061878.15	Sphk1	43.04	38.44	34.23	26.06	19.77	30.45	17.56	16.89	22.03	18.76	20.41	52.78	59.43	47.18	48.39	37.1	28.95	42.62	50.92	54.9	24.02	24.52	23.49	26.95	27.92	16.86	14.35	38.37	37.98	17.03	17.79	29.68	21.8	21.23	19.65	18.5	24.25	22.91	22.76	8.42	8.34	38.29	40.06	40.74	30.145	25.11	17.225	20.4
ENSMUSG00000028047.11	Thbs3	17.92	20.46	16.82	18.35	5.59	12.37	11.94	13.38	10.03	7.14	9.53	31.47	24.75	22.95	19.1	19.23	14.74	25.44	19.47	21.75	18.51	12.97	9.28	8.55	7.88	8.97	9.77	30.09	26.42	11.58	9.82	15.93	15.97	4.79	4.82	9.04	10.33	10.4	11.59	14.81	16.86	13.02	18.01	19.19	17.585	8.98	12.66	8.9
ENSMUSG00000024401.14	Tnf	0.65	1.13	1.73	1.27	0.38	0.41	0.23	0.28	0.52	0.17	0.38	0.46	0.68	0.45	2.46	1.03	2.4	1.11	0.75	0.26	0.62	0.63	0.65	0.4	0.13	0.45	0.37	0.08	0.33	0.22	0.26	0.77	1.04	0.45	0.43	0.45	0.46	0.37	0.2	0.27	0.26	1.13	0.73	0.89	1.5	0.395	0.255	0.356667
ENSMUSG00000047888.9	Tnrc6b	2.78	2.71	3.21	2.55	1.35	2.34	1.95	1.96	1.82	1.93	2.08	3.18	2.75	3.37	2.01	2.26	2.4	3.01	3.25	2.92	1.32	1.25	1.85	1.89	1.82	2.01	1.74	1.86	1.79	1.94	1.99	2.64	2.39	2.06	2.05	2.13	2	1.87	1.91	2.12	2.47	2.4	2.34	2.745	2.88	1.845	1.955	1.94333
ENSMUSG00000025571.13	Tnrc6c	11.35	9.55	10.07	11.28	8.59	10.21	7.83	7.27	6.8	5.3	5.35	11.13	9.83	12.24	10.08	12.61	10.45	12.78	12.12	10.93	8.69	8.28	6.35	6.69	6.92	7.65	6.24	7.64	10.96	7.77	7.92	8.51	8.75	6.92	7.35	6.93	6.85	6.56	6.5	6.97	7.8	9.32	9.33	10.45	10.675	9.4	7.55	5.81667
ENSMUSG00000024098.5	Twsg1	21.52	19.12	17.01	16	11.32	13.56	11.69	12.24	16.23	15.62	14.85	21.59	19.78	24.13	22.98	26.5	23.11	24.19	24.23	22.03	13.55	16.9	15.4	17.02	16.31	11.31	10.85	8.21	24.02	12.84	13.21	25.67	24.8	15.93	15.81	16.71	17.02	16.71	17.03	8.88	8.75	16.72	18.52	20.32	16.505	12.44	11.965	15.5667
ENSMUSG00000029671.15	Wnt16	5.96	4.12	2.03	2.63	1.99	1.36	0.51	0.62	0.36	1.09	0.58	4	4.8	4.66	2.51	1.96	2.19	1.72	1.72	1.5	1.13	0.93	0.9	0.86	2.28	0.34	0.54	0.99	0.93	0.75	0.72	2.07	2.35	0.79	0.73	1.05	1.02	1.31	0.93	0.82	0.7	1.15	1.27	5.04	2.33	1.675	0.565	0.676667
ENSMUSG00000050310.8	Rictor	4.58	4.19	4.76	3.17	1.93	2.89	2.74	2.98	3.22	3.56	3.23	2.59	2.7	2.93	2.14	2.5	2.24	5.22	4.91	4.65	1.47	1.33	3.03	2.87	2.89	3.08	3.33	1.54	3.08	2.81	3.22	4.38	4.6	2.95	2.96	3.56	3.11	2.99	3.07	3.94	3.6	3.73	3.72	4.385	3.965	2.41	2.86	3.33667
ENSMUSG00000038379.15	Ttk	10.01	7.75	6.61	6.59	3.05	4.13	2.16	2.36	3.81	4.06	4.4	4.53	4.68	4.11	6.32	8.17	6.75	5.07	5.35	4.96	3.97	2.88	4.18	5	4.27	3.42	3.9	1.75	4.42	2.36	2.7	8.36	10.06	5.4	4.02	4.87	5.5	5.75	5.28	6.24	5.45	3.89	4	8.88	6.6	3.59	2.26	4.09
ENSMUSG00000068742.11	Cry2	5.16	5.79	7.41	5.96	4.97	7.15	4.85	4.35	3.83	3.94	3.05	13.26	10.15	12.3	7.48	7.39	8.16	9.88	9.89	11.51	5.17	5.43	2.58	4.65	3.34	4.28	3.95	3.77	6.7	4.63	4.25	6.9	7	3.64	4.38	3.59	4.22	3.77	3.43	3.17	3.13	5.29	5.3	5.475	6.685	6.06	4.6	3.60667
ENSMUSG00000039952.15	Dag1	28.52	28.47	26.54	27.65	24.76	23.89	22.02	20.72	23.51	25.92	23.24	33.58	32.33	34.91	34.55	36.38	30.34	36.18	37.06	34	28.95	27.86	25	25.87	25.12	22.29	19.04	20.13	31.84	21.5	22.01	41.78	37.16	26.08	25.55	25.9	24.53	22.42	23.71	21.99	24.46	26.34	26.31	28.495	27.095	24.325	21.37	24.2233
ENSMUSG00000068854.7	Hist2h2be	1.79	2.09	2.09	1.56	0.72	1.09	0.82	0.35	0.9	0.89	0.82	1.25	0.98	1.58	2.01	1.86	1.76	1.23	1.24	1.08	0.92	1.12	1.02	1.09	0.81	0.84	0.85	0.61	1.16	0.67	0.81	1.92	2.06	0.9	1.15	1.16	0.89	1.19	1.32	1.24	1.42	0.78	0.72	1.94	1.825	0.905	0.585	0.87
ENSMUSG00000026077.15	Npas2	1.65	1.64	2.09	1.09	0.13	0.36	0.2	0.15	0.36	0.25	0.37	0.77	0.64	1.19	1.85	1.59	2.1	0.73	0.77	0.9	0.33	0.64	0.48	0.35	0.53	0.36	0.42	0.63	1.08	0.19	0.22	1.3	1.27	0.35	0.18	0.39	0.63	0.41	0.37	0.34	0.4	0.85	0.79	1.645	1.59	0.245	0.175	0.326667
ENSMUSG00000001151.9	Pcnt	3.39	2.94	3.82	3.17	2.39	2.92	2.08	1.93	2.2	2.28	2.21	4.03	2.83	3.53	2.54	2.83	2.81	2.64	2.82	2.84	2.42	1.97	1.95	2.13	2.26	2.89	1.91	1.68	1.93	1.99	1.79	2.98	2.9	2.36	2.21	2.14	2.07	1.62	1.83	2.25	2.55	1.95	1.78	3.165	3.495	2.655	2.005	2.23
ENSMUSG00000032238.17	Rora	47.11	45.21	47.39	36.51	26.09	34.23	18.31	15.84	22.27	23.18	20.7	54.61	55.86	54.09	46.93	49.22	48.53	50.66	51.27	53.37	33.21	24.26	27.21	26.75	24.09	18.49	18.43	33.53	40.35	17.03	17.6	36.78	38.25	20.42	20.76	20.61	24.09	23.63	26.37	29.58	30.31	34.88	36.38	46.16	41.95	30.16	17.075	22.05
ENSMUSG00000004040.16	Stat3	36.47	40.2	41.98	32.13	22.42	35.36	26.1	24.77	19.57	19.39	20.49	46.24	47.11	43.8	43.53	39.46	40.74	40.29	39.08	40.49	29.94	29.41	21.45	20.16	20.15	19.91	19.06	32.3	35.07	22.19	24.12	32.58	29.03	17.83	21.18	20.02	22.58	22.27	23.21	19.85	19.65	34.45	31.58	38.335	37.055	28.89	25.435	19.8167
ENSMUSG00000053477.15	Tcf4	34.35	36.39	39.54	36.66	23.85	25.85	22.7	25.11	28.13	28.03	25.94	47.01	33.2	45.29	47.57	43.93	41.8	45.56	44.16	45.09	34.73	31.13	22.35	24.05	24.73	25.33	25.77	25.21	34.52	25.7	21.94	48.52	47.92	30.04	25.01	28.63	29.64	28.24	28.5	22.48	22.26	27.17	28.59	35.37	38.1	24.85	23.905	27.3667
ENSMUSG00000033102.14	Cdc14b	1.47	1.63	1.58	1.53	0.82	0.82	0.46	0.6	0.43	0.52	0.48	2.5	2.24	2.07	1.82	2.49	2.08	1.64	2.01	1.81	0.96	0.72	0.51	0.78	0.44	0.42	0.46	0.77	1.02	0.56	0.59	1.82	1.59	0.72	0.44	0.7	0.79	0.7	0.66	0.75	0.76	1.06	1.09	1.55	1.555	0.82	0.53	0.476667
ENSMUSG00000027330.16	Cdc25b	14.45	14.2	14.04	14.83	8.52	5.7	7.9	6.02	7.02	7.02	7.72	11.36	11.24	11.79	16.25	13.5	12.9	11.95	10.77	10.27	4.69	4.45	7.74	6.93	6.97	7.55	7.55	4.57	9.1	7.25	7.5	17.8	15.68	8.47	9.85	6.48	9.14	7.9	7.13	6.48	6.24	6.67	8.73	14.325	14.435	7.11	6.96	7.25333
ENSMUSG00000046532.7	Ar	5.62	5.38	6.28	4.61	4.62	4.63	3.23	2.96	3.61	3.67	3.26	8.77	8.16	9.67	8.36	8.75	8.29	5.76	6.22	5.93	5.66	4.63	3.74	4.09	3.66	3.64	3.39	5.03	4.94	3.32	3.36	5.4	5.41	3.49	3.66	4.37	4.07	4.21	4.04	5.37	5.41	4.68	5.1	5.5	5.445	4.625	3.095	3.51333
ENSMUSG00000031016.8	Wee1	4.45	4.65	3.51	4.53	6.7	4.45	1.89	1.77	2.92	3.35	2.4	9.08	9.19	9.23	7.19	8.24	6.78	3.96	3.16	4.24	4.03	6.19	2.9	3.98	2.93	2.14	2.2	1.28	3.13	1.12	1.78	7.91	7.79	3.63	3.78	3.45	2.39	2.97	3.32	1.27	1.31	2.37	2.79	4.55	4.02	5.575	1.83	2.89
ENSMUSG00000026176.13	Ctdsp1	15.15	17.48	17.7	15.53	9.26	11.12	12.57	13.3	9.87	10.41	11.12	18.27	14.68	18.01	16.48	13.92	15.64	19.73	19.9	21.9	9.13	9.07	12.13	10.56	11.78	10.82	11.71	12.57	16.93	12.79	12.13	16.62	16.45	10.44	12.23	11.47	12.42	14.07	11.53	10.97	10.6	14.67	15.13	16.315	16.615	10.19	12.935	10.4667
ENSMUSG00000031565.17	Fgfr1	18.46	17.91	18.82	21.13	10.67	11.83	10.05	10.77	11.99	11.35	11.98	32.01	26.39	31.95	29.43	30.98	24.54	21.58	21.24	24.64	15.72	13.56	9.37	11.27	9.02	11.28	9.83	13.77	20.31	10.19	11.79	35.97	30.95	8.53	9.55	8.9	10.25	10.15	9.18	5.44	4.77	15.7	16.71	18.185	19.975	11.25	10.41	11.7733
ENSMUSG00000021765.7	Fst	40.75	36.22	24.88	27.31	14.64	18.22	15.18	13.76	13.28	13.66	14.04	44.8	44.88	44.32	34.43	37.56	34	29.75	31.18	30.53	18.84	18.77	22.14	21.04	18.63	10.94	10.3	21.18	18.42	16.17	16.65	34.75	34.11	15.14	14.99	15.94	13.19	13.71	14.75	15	16.68	21.38	21.4	38.485	26.095	16.43	14.47	13.66
ENSMUSG00000050288.6	Fzd2	11.1	11	10.24	10.89	6.79	10.05	7.62	7.11	5.48	5.29	5.92	8.41	7.26	8.23	9.4	10.65	9.99	9.11	9.34	9.24	6.14	6.64	7.08	7.43	7.94	7.56	6.22	7.69	6.23	7.62	7.43	8.18	7.4	6.4	6.54	6.78	7.05	7.06	7.51	4.42	3.99	8.09	7.83	11.05	10.565	8.42	7.365	5.56333
ENSMUSG00000027544.16	Nfatc2	2.03	1.98	1.67	1.44	0.9	1.08	1.4	1.36	1.28	1.37	1.29	3.66	2.88	3.62	1.46	1.94	1.44	2.54	2.75	2.46	0.69	0.59	0.79	1.31	0.9	1.08	0.9	2.04	2	1.51	1.4	2.19	1.7	1.12	0.95	0.94	1.2	1.14	1.36	0.5	0.94	2.51	2.8	2.005	1.555	0.99	1.38	1.31333
ENSMUSG00000023034.6	Nr4a1	27.18	26.92	19.08	21.05	9.3	13.65	7.33	7.17	7.08	7.41	6.97	69.51	70.15	69.31	24.03	37.51	21.07	28.42	30.52	31.07	3.32	2.77	7.43	7.63	7.71	3.83	3.11	13.11	25.5	6.76	6.75	45.59	42.2	7.54	8.11	8.61	7.73	7.08	7.9	3.28	3.43	20.86	21.54	27.05	20.065	11.475	7.25	7.15333
ENSMUSG00000041417.15	Pik3r1	17.62	17.59	22.14	16.61	11.21	18.91	10.37	9.64	11.15	10.33	9.64	40.86	29.34	44.72	19.67	16.53	19.49	23.65	22.89	21.09	9.34	8.91	10.98	11.66	13.36	11.59	11.16	14.98	21.71	10.73	9.86	17.09	15.03	12.38	10.17	9.42	9.76	10.28	9.66	12.68	14.39	17.6	18.09	17.605	19.375	15.06	10.005	10.3733
ENSMUSG00000036169.5	Sostdc1	198.97	198.72	150.64	132.18	66.62	111.1	49.64	51.01	71.32	67.5	64.78	121.22	103.72	120.76	173.26	170.78	172.52	145.73	147.76	157.72	96.1	83.28	93.32	90.58	99.84	53.96	49.96	90.08	84.61	52.48	52.3	179.23	180.99	98.44	96.81	111.22	103.97	105.78	108.54	107.95	102.11	84.58	85.55	198.845	141.41	88.86	50.325	67.8667
ENSMUSG00000022382.14	Wnt7b	14.33	13.5	12.55	9.24	6.57	9.76	5.56	6.29	5.43	5.58	6.15	17.19	19.71	15.29	12.94	13.02	10.65	14.88	13.57	15.15	9.39	6.22	6.89	6.99	7.54	4.35	3.89	8.48	13.49	5.7	5.58	10.63	10.02	4.76	5.15	4.65	6.3	6.08	6.3	2.52	2.46	10.06	10.62	13.915	10.895	8.165	5.925	5.72
ENSMUSG00000000184.12	Ccnd2	271.73	412.49	291.79	490.85	224.39	307.74	205.72	224.49	265.97	332.6	239.57	214.83	224.1	208.32	431.67	400.23	527.94	229.88	306.87	295.6	341.08	364.69	203.37	230.4	244.83	388.91	228.12	272.15	164.44	213.47	213.57	439.54	489.71	255.86	261.14	259.53	233.52	248.79	234.03	242.29	209.13	112.89	116.52	342.11	391.32	266.065	215.105	279.38
ENSMUSG00000021936.13	Mapk8	5.18	4.57	4.91	5.15	5.34	3.14	2.08	1.94	3.01	3.12	3	3.77	4.29	3.65	5.22	6.43	5.89	5.13	5.32	5.32	4.51	4.22	3.66	3.45	2.8	3.84	3.79	1.58	2.98	1.97	2	4.99	5.83	3.8	3.72	5.06	3.86	3.31	3.62	6.06	5.08	3.13	3.99	4.875	5.03	4.24	2.01	3.04333
ENSMUSG00000001761.7	Smo	14.61	12.2	11.05	11.07	7.26	9.31	7.42	7.36	7.74	8.02	8.21	8.13	7.3	8.85	12.57	11.99	12.21	9.75	11.43	11.17	7.48	6.69	10.49	9.18	9.9	8.37	9.19	7.12	7.28	7.2	8.9	12.79	11.66	8.32	10.02	9.51	8.68	8.77	9.18	7.17	6.11	8.65	8.83	13.405	11.06	8.285	7.39	7.99
ENSMUSG00000039936.18	Pik3cd	0.63	0.82	1.06	0.84	0.31	0.46	1.25	0.8	0.4	0.58	0.35	3	1.88	2.48	2.11	1.83	1.24	1.13	1.46	1.11	0.51	0.33	1.05	0.37	0.73	0.79	0.77	1.41	1.38	0.74	0.98	1.29	1.13	0.26	0.8	0.32	0.49	0.46	0.53	0.47	0.53	0.69	1.19	0.725	0.95	0.385	1.025	0.443333
ENSMUSG00000021253.6	Tgfb3	4	3.4	3.3	2.88	1.7	1.66	1.23	1.66	1.45	1.28	0.9	4.85	2.88	4.84	6.05	6.48	5.7	3.78	4.21	4.35	3.14	3.67	1.75	1.7	1.55	1.17	1.02	1.19	2.86	1.59	1.44	8.84	8.28	1.88	2.14	2.15	2.49	2.21	2.2	0.86	1.05	1.44	1.46	3.7	3.09	1.68	1.445	1.21
ENSMUSG00000052593.15	Adam17	14.73	14.89	13.72	10.88	7.61	10.16	8.49	11.05	11.79	9.78	9.11	12.15	13.08	12.78	11.78	11.77	10.29	12.83	11.58	12.05	8.07	6.29	9.28	9.52	9.27	9.1	9.6	7	11.7	8.67	9.15	14.03	13.68	9.96	10.12	11.06	10.44	11.45	10.96	13.36	11.45	11.34	11.16	14.81	12.3	8.885	9.77	10.2267
ENSMUSG00000049502.16	Dtx3l	2.95	2.72	2.86	2.88	2.6	2.69	2.3	2.34	2.27	1.64	1.68	6	5.43	6.2	4.2	4.47	4.19	4.51	4.34	3.81	2.44	2.27	2.13	1.73	2.07	1.38	1.95	2.38	4.3	2.49	2.04	3.11	3.61	2.13	2.19	1.95	1.86	1.91	1.97	1.44	1.6	2.36	1.99	2.835	2.87	2.645	2.32	1.86333
ENSMUSG00000024985.18	Tcf7l2	40.3	40.27	43.4	48.51	44.23	33.25	30.4	28.58	36.37	34.14	30.02	49.15	46.98	54.09	67.88	74.53	84.61	49.67	51.72	50.65	59.69	54.91	25.39	28.33	28.88	36.68	32.17	29.44	39.94	30.68	29.65	52.86	53.38	31.7	33.81	32.92	30.3	29.45	29.98	28.05	30.8	30.21	28.65	40.285	45.955	38.74	29.49	33.51
ENSMUSG00000027803.14	Wwtr1	14.79	14.41	14.71	13.09	10.82	13.3	10.43	10.38	9.3	9.99	11.44	13.26	13.19	13.53	13.1	12.99	11.9	15.71	14.78	13.67	10.99	11.4	11.93	11.81	11.61	10.23	11.51	12.81	12.95	9.9	9.71	13.82	12.41	12.35	12.57	10.75	10.17	10.7	11.88	12.11	13.43	10.43	11.65	14.6	13.9	12.06	10.405	10.2433
ENSMUSG00000024960.8	Plcb3	15.4	12.84	14.13	15.48	11.14	10.46	8.63	7.88	9.51	9.31	10.34	13.83	11.89	12.42	16.76	16.17	15.03	11.45	12.6	11.64	10.23	11.41	10.63	10.12	10.45	10.53	9.56	7.19	11.1	8.75	8.44	15.67	13.85	10.54	11.53	10.03	11.76	11.34	10.2	11.52	12.11	8.51	9.62	14.12	14.805	10.8	8.255	9.72
ENSMUSG00000052889.11	Prkcb	5.6	5.42	4.7	4.7	1.69	5.07	2.85	2.44	2.15	2.21	1.67	8.62	6.5	8.04	5.19	6.21	5.52	5.39	5.74	4.23	5.25	3.89	3.55	2.13	3.49	2.17	2.37	7.26	6.14	2.14	1.79	3.27	4.64	1.46	1.92	2.83	2.01	3.17	3.63	5.67	5.76	6.31	5.68	5.51	4.7	3.38	2.645	2.01
ENSMUSG00000020431.5	Adcy1	1.23	1.15	1.06	0.78	0.39	0.79	0.21	0.18	0.31	0.31	0.34	1.37	0.98	1.29	0.94	0.83	0.79	1.33	1.34	1.26	0.28	0.25	0.37	0.46	0.33	0.3	0.25	0.54	0.66	0.25	0.22	0.78	0.74	0.26	0.4	0.49	0.4	0.49	0.52	0.59	0.55	0.64	0.57	1.19	0.92	0.59	0.195	0.32
[truncated: 13 more columns]

## Sheet: Activator, Chin
Gene_ID	Gene_Name	CCT1	CCT2	CEA1	CEA2	CMA1	CMA2	CLA1	CLA2	CC1	CC2	CC3	CRT1	CRT2	CRT3	VCT1	VCT2	VCT3	VEA1	VEA2	VEA3	VMA1	VMA2	VLA1	VLA2	VLA3	VC1	VC2	VRT2	VRT1	DCT1	DCT2	DEA1	DEA2	DMA1	DMA2	DMA3	DLA1	DLA2	DLA3	DC2	DC1	DRT2	DRT1	mean.CCT	mean.CEA	mean.CMA	mean.CLA	mean.CC
ENSMUSG00000007872.3	Id3	303.41	273.67	243.78	297.36	210.41	151.88	163.19	147.52	214.29	207.84	218.37	172.83	141.67	155.06	315.91	311.56	250.22	140.48	161.17	157.57	145.96	162.99	186.71	200.89	212.89	280.05	220.1	219.79	136.35	156.87	146.17	237.59	243.82	259.27	254.28	157.5	222.72	211.51	201.85	151.32	148.82	108.14	124.69	288.54	270.57	181.145	155.355	213.5
ENSMUSG00000053754.13	Chd8	7.91	10.92	12.5	11.82	7.57	8.51	6.01	7.34	5.52	5.59	5.59	7.11	9.78	10.18	8.18	7.85	7.7	8.36	8.23	7.9	5.53	4.64	6.54	7.48	6.87	8.12	9.18	5.68	5.99	5.95	6.82	7.28	6.94	6.75	7.05	6.83	5.76	6.07	5.57	7.48	6.36	7.67	8.54	9.415	12.16	8.04	6.675	5.56667
ENSMUSG00000020716.15	Nf1	6.08	4.31	4.2	5.49	2.79	3.38	2.92	2.7	1.09	1.59	2.3	3.16	2.98	3.6	2.75	3.17	2.36	2.44	2.05	2.26	2.7	1.38	1.97	1.85	1.98	2.85	2.73	3.12	3.2	2.65	2.06	2.84	3.42	2.4	2.13	1.57	2.06	2.46	2.26	5.17	5.5	3.15	3.57	5.195	4.845	3.085	2.81	1.66
ENSMUSG00000046020.13	Pofut1	2.9	2.88	3.78	2.91	2.21	2.67	2.23	2.01	1.93	2.06	1.99	3.05	2.75	3.39	2.7	2.01	2.42	2.39	2.24	2.25	1.69	1.52	2.25	2	2.72	1.81	2.38	2.29	2.85	2.09	2.14	3.32	2.17	1.86	2.21	1.9	2.41	2.08	2.12	3.87	2.83	2.4	2.72	2.89	3.345	2.44	2.12	1.99333
ENSMUSG00000011960.12	Ccnt1	23.22	28.64	31.31	27.03	21.18	26.12	19.14	25.54	27.64	22.04	22.49	18.5	21.16	20.47	20.38	20.99	22.08	25.68	22.53	24.72	18.79	17.89	18.89	21.07	21.56	25.2	30.64	14.48	15.17	23.52	23.05	26.8	27.46	24.17	24.72	21.87	21.76	22.88	20.61	30.12	28.11	21.98	18.94	25.93	29.17	23.65	22.34	24.0567
ENSMUSG00000025246.13	Tbl1x	16.5	17.54	16.34	18.31	16.81	12.44	10.72	10.36	12.57	13.53	13.47	14.23	14.94	14.66	16.88	18.56	16.87	12.82	14.22	13.08	17.08	15.48	13.73	13.28	13.3	13.28	14.17	11.41	13.31	11.66	10.61	15.61	15.22	12.89	12.88	13.12	12.62	12.96	13.32	17.45	16.98	12.79	14.03	17.02	17.325	14.625	10.54	13.19
ENSMUSG00000061665.6	Cd2ap	24.53	20.83	22.36	23.81	19.34	18.41	14.07	13.13	16.32	16.83	16.12	13.15	14.74	13.98	18.55	21.35	18.56	17.84	17.01	16.67	16.55	17.72	17.61	17.83	18.26	15.9	16.6	11.37	16.46	14.68	14.16	19.27	20.81	17.66	17.29	16.19	16.07	15.06	15.28	25.11	23.96	17.92	18.21	22.68	23.085	18.875	13.6	16.4233
ENSMUSG00000025958.14	Creb1	7.93	8.24	8.56	7.96	5.06	5.79	4.15	4.2	5.36	6.1	6.85	5.98	5.01	7.08	5.48	8.29	5.03	5.91	5.02	5.17	3.52	4.69	6.35	5.68	5.8	6.1	5.88	3.55	4.61	5.01	4.71	8.64	6.77	6.23	6.79	7.36	6.14	5.72	5.47	10.67	9.92	6.07	5.37	8.085	8.26	5.425	4.175	6.10333
ENSMUSG00000052155.5	Acvr2a	8.85	6.19	7.18	6.15	5.03	5.02	3.47	3.86	5.34	5.94	5.3	4.77	5.17	5.43	5.7	7.6	5.99	6.38	7.25	6.59	4.72	4.96	5.04	6.14	5.52	4.78	4.72	3.44	6.26	4.38	4.37	6.12	7.22	5.06	6.07	5.62	5.25	5.25	5.63	7.88	8.08	6.82	7.08	7.52	6.665	5.025	3.665	5.52667
ENSMUSG00000024974.10	Smc3	21.07	19.94	17.17	23.16	16.36	16.09	12.73	12.67	12.99	14.54	12.28	12.36	12.93	12.76	17.23	20.56	19.29	12.4	13.32	13.19	17.37	14.5	13.06	14.19	15.12	15.32	15.05	12.14	9.69	13.03	13.86	17.01	19.46	13.66	14.22	15.35	13.54	14.57	13.64	36.75	35.25	11.06	12.34	20.505	20.165	16.225	12.7	13.27
ENSMUSG00000027276.7	Jag1	62.22	58.5	65.65	92.03	90.99	56.36	34.4	33.17	45.45	43.86	39.27	30.85	44.12	37.27	62.89	79.95	71.18	34.43	34.7	33.92	67.63	67.82	42.14	47.17	48.13	53.87	56.32	29.3	40.32	34.42	34.21	48.04	53.94	47.85	52.11	66.53	51.89	54.44	55.27	125.26	134.3	36.02	36.39	60.36	78.84	73.675	33.785	42.86
ENSMUSG00000034574.9	Daam1	14.79	14.47	14.81	12.52	8.07	11.66	7.74	7.76	10.41	10.77	9.24	8.21	8.8	8.75	8.15	9.68	9.29	10.8	10.25	10.76	5.53	4.9	11.48	10.97	10.5	9.01	9.55	6.72	12.08	8.68	9.13	9.74	8.99	10.66	11.74	10.89	9.63	10.16	9.68	12.45	13	11.42	11.81	14.63	13.665	9.865	7.75	10.14
ENSMUSG00000021816.10	Ppp3cb	17.51	17.12	19.66	19.39	12.8	17.92	11.74	12.93	10.17	12.36	9.92	14.42	13.24	11.9	9.23	15.33	10.77	12.48	13.11	12.16	8.66	5.99	13.8	12.78	11.87	14.13	16.44	9.35	10.81	13.09	16.97	12.96	11.98	9.99	10.52	12.26	9.89	11.72	9.91	31.36	34.28	13.22	13.85	17.315	19.525	15.36	12.335	10.8167
ENSMUSG00000027630.13	Tbl1xr1	9.94	10.72	9.62	10.32	5.41	6.8	6.51	6.5	7.44	8.99	6.56	9.39	6.14	7.29	6.6	8.55	6.94	7.42	5.82	6.84	8.08	4.56	6.4	6.82	7.92	6.34	7.28	4.51	7.88	5.89	6.93	8.08	7.93	6.72	7.35	7.8	8.88	7.26	6.77	9.79	9.96	6.89	7.45	10.33	9.97	6.105	6.505	7.66333
ENSMUSG00000048616.4	Nog	0.9	1.59	1.47	1.33	1.17	0.98	0.35	0.43	0.65	0.29	0.26	1.13	0.98	1.59	1.02	1.56	1.18	1	0.48	0.8	0.49	0.72	0.62	0.57	0.45	0.6	0.65	0.63	1.98	0.69	0.65	0.56	0.5	0.57	0.14	0.48	0.35	0.59	0.67	0.58	0.57	0.85	0.99	1.245	1.4	1.075	0.39	0.4
[truncated: 13 more columns]

## Sheet: Activator, Ventral
Gene_ID	Gene_Name	CCT1	CCT2	CEA1	CEA2	CMA1	CMA2	CLA1	CLA2	CC1	CC2	CC3	CRT1	CRT2	CRT3	VCT1	VCT2	VCT3	VEA1	VEA2	VEA3	VMA1	VMA2	VLA1	VLA2	VLA3	VC1	VC2	VRT2	VRT1	DCT1	DCT2	DEA1	DEA2	DMA1	DMA2	DMA3	DLA1	DLA2	DLA3	DC2	DC1	DRT2	DRT1	mean.CCT	mean.CEA	mean.CMA	mean.CLA	mean.CC
ENSMUSG00000022216.16	Psme1	102.22	122.56	104	98.34	71.92	91.03	93.54	89.03	75.51	88.73	75.83	140.87	135.29	128.24	105.12	115.8	108.69	137.92	149.29	142.7	71.13	69.12	107.35	84.13	92.93	65.12	70.76	143.48	100.53	96.33	91.14	113.15	120.59	94.81	87.42	79.46	106.83	90.46	98.52	97.29	134.57	107.87	102.53	112.39	101.17	81.475	91.285	80.0233
ENSMUSG00000078429.8	Ctdsp2	25.85	24.82	27.21	22.5	15.11	23.03	24.8	24.94	17.02	17.52	16.31	30.39	24.55	31.61	24.11	20.26	20.52	36.02	35.05	39.61	17.96	15.33	19.79	19.04	19.89	18.92	18.87	29.71	31.83	24.13	23.51	23.91	20.05	14.75	15.7	18.04	19.64	18.21	18.93	21.66	18.8	29.17	27.57	25.335	24.855	19.07	24.87	16.95
ENSMUSG00000005580.11	Adcy9	1.64	2.04	2.13	1.4	1.5	1.55	1.3	1.66	1.46	1.18	1.2	2.98	1.76	2.22	1.46	1.51	1.5	2.08	2.32	2.32	1.33	1.22	1.28	1.29	1.19	1.3	1.34	2.01	2.34	1.59	1.39	1.77	1.3	1.1	1.23	1.1	1.25	1.2	1.68	2.18	2.76	1.61	2.01	1.84	1.765	1.525	1.48	1.28
ENSMUSG00000024304.14	Cdh2	1.29	1.32	0.76	0.78	0.18	0.7	0.21	0.64	0.28	0.41	0.49	0.74	0.85	1.13	0.91	0.63	0.84	2.03	2.03	1.18	0.5	0.25	0.35	0.48	0.55	0.41	0.41	0.59	0.56	0.36	0.49	0.81	0.79	0.61	0.49	0.51	0.54	0.56	0.46	0.63	0.48	0.53	0.54	1.305	0.77	0.44	0.425	0.393333
ENSMUSG00000062960.10	Kdr	2.02	1.85	1.94	2.18	1.28	0.9	1.43	1.81	1.53	1.34	1.08	3.02	2.49	3.44	2.26	1.96	2.23	4.51	5.21	5.15	1.96	1.84	1.49	1.56	1.7	1.24	1.25	1.87	2.68	1.68	1.38	2.98	2.4	1.48	1.28	1.68	1.4	1.61	1.69	2.57	3.35	1.8	1.68	1.935	2.06	1.09	1.62	1.31667
ENSMUSG00000034330.9	Plcg2	3.46	4.03	3.54	3.06	1.95	2.44	2.89	2.71	2.74	2.59	2.37	7.11	6	6.06	3.96	3.84	3.75	6.67	5.58	5.39	2.3	1.3	2.67	2.92	2.72	1.74	2.25	4.3	4.89	2.89	2.7	3.75	3.87	2.32	2.32	2.5	2.61	2.43	2.66	2.58	2.61	5.05	4.84	3.745	3.3	2.195	2.8	2.56667
ENSMUSG00000022994.8	Adcy6	1.56	1.54	1.75	1.62	0.86	1.34	0.98	1.49	0.79	0.88	0.98	2.35	1.78	2.15	1.5	1.17	1.53	2.8	2.21	2.78	0.73	0.51	0.92	0.95	1.14	1.04	1.1	1.23	1.75	1.17	0.94	1.59	1.16	1.06	1.14	0.97	1.34	1.07	0.96	0.98	0.87	1.49	1.53	1.55	1.685	1.1	1.235	0.883333
ENSMUSG00000018909.15	Arrb1	2.73	2.8	2.76	2.2	2	2.35	2.49	2.21	2.53	2.68	1.96	5.25	3.6	5.22	2.77	2.41	2.66	5.17	4.63	5.06	1.45	1.32	2.25	2.59	2.91	1.88	2.39	3.79	4.32	1.96	2.04	2.47	2.99	2.02	2.17	1.65	1.99	1.82	1.99	1.85	2.11	3.36	3.41	2.765	2.48	2.175	2.35	2.39
ENSMUSG00000031871.8	Cdh5	2.74	3.59	3.61	3.34	1.96	2.41	3.24	3.25	2.24	2.54	2.33	5.53	4.38	6.84	3.51	3.14	4.13	12.43	10.38	9.47	3.17	4.08	2.91	3.75	3.01	2.81	2.98	2.85	5.35	3.01	3.36	3.95	4.3	2.54	3.31	3.27	2.71	2.85	3.4	3.58	3.38	4.19	4.11	3.165	3.475	2.185	3.245	2.37
ENSMUSG00000029648.13	Flt1	2.62	1.58	2.51	2.39	1.3	1.08	1.82	1.91	1.47	1.67	1.7	3.54	2.74	3.8	1.82	1.88	1.69	6.53	6.36	6.23	1.31	1.27	1.33	1.37	1.43	1.16	1.69	1.56	3.38	2.02	1.83	1.92	2.92	1.51	1.07	1.26	1.23	1.16	1.14	2.55	3.25	1.84	1.68	2.1	2.45	1.19	1.865	1.61333
ENSMUSG00000038146.7	Notch3	5.47	5.65	6	5.46	3.53	5.41	4.64	4.91	4.1	4.04	4.1	6	5.23	5.67	4.75	4.79	4.47	7.84	8.35	7.82	2.97	2.98	4.73	4.66	5.18	4.9	4.27	4.41	5.63	4.84	4.41	4.75	4.81	4.64	4.68	3.93	4.75	4.8	4.59	2.29	2.19	6.67	6.44	5.56	5.73	4.47	4.775	4.08
ENSMUSG00000039943.16	Plcb4	3.34	2.84	2.89	3.48	2.59	2.95	1.81	2.25	2.3	2.34	1.85	6.85	3.98	6.18	3.58	3.06	2.91	5.93	6.12	6.77	2.4	2.06	3.29	2.05	2.44	1.73	1.79	3.98	5.27	2.24	1.85	3.05	2.78	2.25	1.76	2.06	2.92	2.57	2.28	4.15	5.09	4.48	4.55	3.09	3.185	2.77	2.03	2.16333
ENSMUSG00000079197.10	Psme2	211.88	204.6	200.76	181.93	135.22	155.04	154.16	173.53	149.94	142.76	143.74	275.24	232.64	247.04	256.2	242.99	249.15	261.5	269.57	267.22	166.51	156.8	165.56	171.6	154.62	139.01	147.45	241.02	220.67	165.59	162.64	220.73	200.31	161.66	151.43	187.96	186.11	183.68	193.76	248.5	258.91	202.31	185.97	208.24	191.345	145.13	163.845	145.48
ENSMUSG00000029304.14	Spp1	2.57	3.61	4.18	3.46	1.09	1.44	3.79	4.61	2.03	2.09	2.99	9	5.98	9.2	2.67	4.09	2.27	9.89	8.8	11.49	1.52	0.56	1.36	2.42	2.18	0.65	1.1	5.4	4.63	4.21	4.05	6.16	5.07	3.18	2.96	5.03	2.39	2.61	3.63	4.9	7.11	5.49	4.12	3.09	3.82	1.265	4.2	2.37
ENSMUSG00000055799.13	Tcf7l1	5.79	6.56	6.93	9.86	6.96	8.36	7.18	7.76	4.97	5.63	5.94	10.1	11.57	9.23	14.03	14.11	13.1	11.5	12.27	13.1	4.95	7.35	6.27	5.89	5.46	6.2	6.98	10.4	5.88	8.13	6.56	6.92	6.95	6.93	6.5	6.07	7.55	7.87	6.61	5.01	3.18	8.26	8	6.175	8.395	7.66	7.47	5.51333
ENSMUSG00000029287.14	Tgfbr3	4.7	4.79	5.51	5.19	3.75	3.91	4.06	4.88	2.75	3.26	3.09	8.72	7.38	10.18	5.59	8.01	7.2	8.99	8.4	9.72	4.42	3.75	3.28	3.01	3.12	2.47	3.02	4.5	7.32	4.12	4.46	5.62	5.99	2.75	2.84	3.19	3.86	3.41	3.76	5.6	5.37	4.36	4.45	4.745	5.35	3.83	4.47	3.03333
ENSMUSG00000008305.18	Tle1	7.04	6.83	6.9	6.86	5.91	5.88	5.86	6.73	7.41	6.16	5.45	11.19	6.95	9.34	7.2	7.03	6.12	11.29	10.74	13.17	6.89	6.69	6.78	7.57	9.27	6.7	3.91	10.38	12.25	5.57	5.64	7.99	8.18	5.97	4.69	5.26	5.76	6.91	5.74	8.94	9.26	10.75	11.1	6.935	6.88	5.895	6.295	6.34
ENSMUSG00000015522.18	Arnt	11.42	11.56	12.23	13.48	10.68	11.02	9.7	9.06	11.04	10.36	10.06	12.75	14.18	13.91	11.9	14.65	12.27	13.38	13.09	12.96	8.11	9.94	8.72	9.64	8.87	9.55	9.39	6.19	10.37	10.2	10.84	13.78	14.01	10.76	10.79	10.15	10.31	11.55	10.25	18.94	18.92	10.55	10.48	11.49	12.855	10.85	9.38	10.4867
ENSMUSG00000048612.15	Myof	2.87	2.7	2.65	2.15	1.34	1.99	1.58	1.5	1.61	1.76	1.53	2.86	1.84	2.99	1.96	2.1	2.03	5.01	4.8	4.82	1.44	1.02	2.18	2.25	1.99	1.35	1.6	2.62	3.85	2.01	1.82	2.81	2.94	2.19	1.8	2.24	2.38	2.34	2	1.54	1.94	3.12	3.21	2.785	2.4	1.665	1.54	1.63333
ENSMUSG00000031922.12	Cep57	31.61	44.81	47.94	41.19	18.37	36.21	26.09	32.11	49.91	29.27	34.26	39.62	29.03	35.91	17.46	22.72	42.52	47.14	40.42	43.59	18.95	14.52	15.39	18.94	18.9	37.1	24.49	20.6	12.44	28.27	31.2	26.25	31.11	35.3	30.6	36.86	21.92	25.77	11.18	40.79	37.34	37.5	28.94	38.21	44.565	27.29	29.1	37.8133
ENSMUSG00000015846.14	Rxra	17.47	16.46	15.38	13.21	7.54	11.69	10.47	11.35	10.1	10.52	10.72	18.24	15.15	17.45	14	12.63	12.18	21.51	21.44	22.62	8.13	8.04	12.83	12.24	12.5	11.54	9.69	12.41	15.46	11.39	11.17	14.24	13.3	10.14	10.47	11.12	13.11	11.66	12.24	7.81	6.94	18.68	17.81	16.965	14.295	9.615	10.91	10.4467
ENSMUSG00000028063.15	Lmna	407.09	353.22	311.21	377	436.87	381.19	301.01	284.94	281.12	273.5	278.42	552.52	608.62	486.43	525.32	563.2	437.98	486.18	562.53	595.31	524.1	506.05	302.39	325.5	314.22	274.28	223.23	448.3	472.06	304.48	292.67	341.67	320.96	280.87	285.02	282.39	324.98	295.53	316.58	345.7	349.79	393.77	385.74	380.155	344.105	409.03	292.975	277.68
[truncated: 13 more columns]

## Sheet: Activator, Dorsal
Gene_ID	Gene_Name	CCT1	CCT2	CEA1	CEA2	CMA1	CMA2	CLA1	CLA2	CC1	CC2	CC3	CRT1	CRT2	CRT3	VCT1	VCT2	VCT3	VEA1	VEA2	VEA3	VMA1	VMA2	VLA1	VLA2	VLA3	VC1	VC2	VRT2	VRT1	DCT1	DCT2	DEA1	DEA2	DMA1	DMA2	DMA3	DLA1	DLA2	DLA3	DC2	DC1	DRT2	DRT1	mean.CCT	mean.CEA	mean.CMA	mean.CLA	mean.CC
ENSMUSG00000024142.14	Mlst8	5.44	5.13	5.5	5.1	3.32	3.5	4.55	4.04	4.13	4.26	5.19	3.93	3.06	3.43	6.46	5.82	5.19	4.15	4.71	3.91	3.81	3.4	4.69	3.35	4.3	3.86	4.09	2.56	4.81	3.3	3.97	7.37	6.81	4.46	4.41	4.17	4.46	4.43	4.56	1.75	2.11	3.12	3.87	5.285	5.3	3.41	4.295	4.52667
ENSMUSG00000047407.17	Tgif1	33.65	30.47	27.63	29.28	19.89	15.88	21.8	22.71	28.74	27.65	25.48	18.55	17.73	24.2	43.48	40.33	36.87	30.91	33.36	30.44	26.53	27.73	23.09	22.36	23	23.19	23.98	23.66	25.36	21.21	24.42	51.43	48.38	21.37	19.77	22.93	25.59	23.97	24.93	17.3	20.33	21.75	24.79	32.06	28.455	17.885	22.255	27.29
ENSMUSG00000041193.15	Pla2g5	2.42	1.74	1.2	0.82	0.79	0.74	0.48	0.34	1.54	0.25	0.42	3.64	1.86	2.58	3.3	1.86	3.22	1.46	1.93	1.76	1.45	0.71	2.28	1.49	1.2	0.82	0.5	1.28	2.42	0.26	0.83	3.51	2.42	0.96	0.43	0.56	0.72	1.05	1.14	0.05	0.05	1.17	1.29	2.08	1.01	0.765	0.41	0.736667
ENSMUSG00000020888.16	Dvl2	6.78	6.15	5.69	6.28	3.88	5.48	3.93	4.62	6.04	4.22	4.46	5.79	3.49	5.47	9.1	6.99	7.62	5.49	5.63	5.15	5.34	6.51	4.61	4.98	5.49	6.52	5.95	2.48	5.99	5.03	4.46	8.76	8.26	5.35	4.96	5.25	4.69	5.01	4.7	2.02	2.2	4.12	3.52	6.465	5.985	4.68	4.275	4.90667
ENSMUSG00000003233.11	Dvl3	2.56	2.03	2.63	2.53	1.47	2.33	1.55	1.85	2.11	1.81	2.11	2.55	2.01	2.02	2.71	2	2.78	2.3	2.52	2.4	1.53	2.31	1.49	2.21	2.25	2.1	1.83	0.79	2.03	2.02	1.68	3.77	3.76	2.65	2.33	1.98	1.85	1.85	1.57	0.34	0.27	2.04	1.41	2.295	2.58	1.9	1.7	2.01
ENSMUSG00000003458.12	Ncstn	34.08	32.42	31.47	25.59	21.75	24.45	24.18	25.49	32.82	31.91	32.19	30.58	27.67	33.34	40.24	35.74	32.56	38.58	37.14	38.72	23.75	26.99	30	32.13	30.02	27.02	26.03	11.74	41.86	26.34	26.21	45.64	43.3	34.08	36.77	37.63	31.72	31.38	32.26	7.11	7.89	32.07	29.89	33.25	28.53	23.1	24.835	32.3067
ENSMUSG00000042632.16	Pla2g6	2.37	1.96	2.64	2.28	3	3.15	3.04	2.69	3.23	3.1	3.39	2.43	3.2	3.46	3.12	3.49	3.26	2.49	2.19	2.43	1.95	2.23	3.74	2.33	2.74	3.11	2.67	1.53	3.64	2.55	3.22	4.1	4.1	3.34	2.35	2.94	3.73	3.02	2.85	1.03	1.15	1.96	2.38	2.165	2.46	3.075	2.865	3.24
ENSMUSG00000020271.17	Fbxw11	15.9	15.78	14.21	14.77	15.2	10.25	12.9	13.07	18.46	16.65	16.82	16.95	16.11	15.43	20.79	16.68	17.47	15.09	14.57	15.63	14.99	17.4	17.38	16.58	16.41	13.83	15.13	9.37	20.51	13.47	12.88	20.2	17.62	17.35	16.68	16.44	15.77	15.82	17.56	13.42	13.62	14.79	15.81	15.84	14.49	12.725	12.985	17.31
ENSMUSG00000030751.17	Psma1	305.26	249.8	217.29	252.58	241.5	167.28	196.82	196.25	260.68	276.6	298.76	190.55	200.13	183.29	311.97	313.33	243.88	200.64	199.38	202.68	202.79	229.77	271.69	278.47	266.22	224.57	239.85	201.51	220.22	202.89	204.58	334.43	333.8	290.7	277.27	248.88	269.13	248.59	275.14	191.21	208.16	164.78	184.52	277.53	234.935	204.39	196.535	278.68
ENSMUSG00000022414.7	Tab1	9.12	8.49	8.23	8.91	7.92	7.46	5.67	6.28	6.63	5.9	6.66	8.17	6.17	6.74	11.68	9.18	10.42	6.72	7.15	6.22	7.97	7.44	6.6	6.82	6.45	6.09	6.35	4.3	6.89	6.63	6.47	14.03	11.94	7.3	7.33	6.53	6.98	6.62	7.64	3.74	4.32	5.08	4.54	8.805	8.57	7.69	5.975	6.39667
ENSMUSG00000030170.14	Wnt5b	3.82	3.02	3.39	2.89	3.35	2.98	2.45	1.93	2.11	2.42	2.39	2.77	2.26	3.12	6.67	5.66	4.63	3.01	3.11	3.53	2.73	4.51	3.18	2.37	2.44	2.42	1.91	2.89	3.89	1.96	1.62	6.45	6.31	1.97	2.47	2.54	3.56	2.52	2.66	3.13	3.02	1.99	2.94	3.42	3.14	3.165	2.19	2.30667
ENSMUSG00000020471.11	Pold2	26.43	31.84	23.66	32.97	40.15	24.58	22.13	19.58	30.33	28.11	30.28	21.51	19.04	18.37	42.37	42.22	38.53	20.4	20.78	23.1	30.76	39.24	23.27	22	24.55	25.89	32.22	11.4	12.04	20.69	22.76	49.48	44.11	35.62	32.47	35.03	32.32	33.21	34.91	21.73	17.55	9.98	11.71	29.135	28.315	32.365	20.855	29.5733
ENSMUSG00000033970.15	Rfc3	22.17	21.19	20.54	20.62	17.46	11.63	16.43	12.65	15.46	18.08	17.59	13.75	13.02	13.7	31.15	22.95	28.71	16.72	14.45	17.58	14.28	16.18	16.72	16.48	14.86	17.49	16.83	11.71	14.56	13.07	11.44	35.4	33.12	17.27	17.7	16.5	18.41	20.65	19.16	25.92	23.39	9.32	11.84	21.68	20.58	14.545	14.54	17.0433
ENSMUSG00000019988.6	Nedd1	7.27	5.44	5.1	5.16	4.85	3.43	3.9	4.02	5.69	6.47	5.75	4.18	3.9	4.53	6.83	7.61	6.12	4.44	4	3.85	5.09	4.98	4.7	5.01	4.77	4.58	4.56	1.7	4.59	3.82	4.35	9.03	10.35	6.33	6.04	7.1	6.26	5.13	7.43	5.99	6.12	3.31	3.43	6.355	5.13	4.14	3.96	5.97
ENSMUSG00000027490.17	E2f1	2.56	3.33	2.78	2.55	3.04	2.42	2.48	2.47	2.04	1.55	1.56	2.56	2.06	2.84	3.71	3.5	3.36	2.36	2.19	2	2.38	3.05	1.51	1.73	2.97	2.91	2.11	1.58	2.19	2.46	2.13	4.5	3.72	2.48	2.4	1.9	2.28	2.19	2.36	2.04	1.43	1.27	1.05	2.945	2.665	2.73	2.475	1.71667
ENSMUSG00000048402.14	Gli2	1.34	1.58	1.35	1.59	1.13	0.98	1.61	1.65	1.67	1.92	1.82	1.46	1.23	1.15	1.94	1.93	1.75	1.28	1.33	1.23	1	1.15	1.3	1.45	1.34	1.3	1.5	0.98	1.35	1.68	1.84	3.25	2.3	1.13	1.06	1.2	1.08	0.96	1.23	0.96	0.88	1.54	1.78	1.46	1.47	1.055	1.63	1.80333
ENSMUSG00000017493.12	Igfbp4	54.52	46.99	37.24	51.21	41.4	35.9	43.71	44.21	30.97	34.66	36.06	73.7	73.13	68.34	87.43	75.69	76.13	41.98	40.89	39.1	37.37	40.32	38.49	36.96	30.6	33.9	37.75	61.62	57.17	43.35	43.59	84.74	74.78	34.25	31.19	28.92	35.2	33.12	31.73	37.06	34.95	36.23	34.3	50.755	44.225	38.65	43.96	33.8967
ENSMUSG00000005034.15	Prkacb	9.72	7.5	8.68	8.26	7.66	5.74	6.15	6.04	6.83	6.4	5.99	9.08	6.91	8.99	9.62	12.56	8.54	7.67	7.07	7.11	6.12	7.18	6.16	6.43	6.48	6.38	6.27	3.99	8.94	6.78	6.23	12.44	12.16	6.65	6.65	7.44	6.72	6.93	6.93	7.36	8.88	6.42	6.48	8.61	8.47	6.7	6.095	6.40667
ENSMUSG00000022261.5	Sdc2	12.98	13.1	10.27	12.62	7.54	8.37	8.49	9.2	9.63	10.04	10.18	16.85	12.82	15.42	15.75	16.5	14.09	11.98	11.43	12.21	9.34	9.36	10.85	12.11	9.28	9.23	8.36	11.4	14.56	9.77	10.49	14.87	16.43	8.7	9.56	9.47	10.4	12.55	10.49	8.58	9.09	7.98	8.68	13.04	11.445	7.955	8.845	9.95
ENSMUSG00000062175.13	Tgif2	1.03	1.91	0.72	2.3	1.1	0.84	1.2	1.16	0.21	1.6	1.6	0.32	0.66	0.06	3.46	2.24	2.35	0.33	0.91	0.58	1.16	1.68	0.35	0.42	1.03	1.16	0.61	0	0.62	0.55	0.36	2.29	2.2	0.43	1.3	0.72	1.35	0.97	0.85	0	0	0.18	0.14	1.47	1.51	0.97	1.18	1.13667
ENSMUSG00000019927.6	Ube2d1	12.78	12.51	14.4	16.59	9.66	11.77	13.73	13.1	12.09	9.39	9.46	16.48	13.88	20.23	10.26	13.05	14.04	12.88	10	11.15	12.6	13.56	12.41	11.1	10.64	10.39	11.79	6.3	12.66	13.64	13.37	13.19	14.45	10.04	9.07	10.39	9.12	10.25	11.08	5.61	6.84	14.01	12.6	12.645	15.495	10.715	13.415	10.3133
ENSMUSG00000029060.17	Mib2	5.05	4.32	6.18	6.47	7.12	6.57	3.8	4.02	4.19	3.66	3.27	8.21	7.72	8.33	9.34	7.87	5.97	5.67	7.56	5.27	4.84	4.41	5.47	4.72	4.62	5.36	4.83	4.7	5.13	3.43	4.22	5.84	4.86	5.28	3.83	3.25	3.47	3.91	4.23	3.32	3.72	5.17	3.84	4.685	6.325	6.845	3.91	3.70667
ENSMUSG00000022150.16	Dab2	4.54	5.24	4.47	5.04	2.7	1.86	5.29	5.81	2.62	2.93	3.11	8.79	6.89	10.15	8.87	10.83	11.78	5.56	6.68	5.65	4.53	4.07	1.91	2.42	2.31	2.89	3.78	4.49	5.91	5.6	5.03	11.81	10.62	2.06	2.4	2.53	3.07	2.75	2.4	3.14	4.19	2.77	2.41	4.89	4.755	2.28	5.55	2.88667
ENSMUSG00000022048.8	Dpysl2	27.94	26.45	24.31	38.22	32.61	17.96	17.98	18.35	17.71	17.98	17.4	56.6	53.18	63.75	81.93	104.71	88.52	47.86	48.1	50.5	87.12	84.07	14.62	16.52	16.55	16.39	16.71	24.34	28.65	21.06	20.43	50.05	51.17	18.14	18.71	26.29	23.46	23.84	24.1	8.41	8.41	15.61	14.22	27.195	31.265	25.285	18.165	17.6967
ENSMUSG00000005699.15	Pard6a	7.07	6.93	6.71	7.08	4.43	3.79	6.89	5.44	6.46	5.07	5.93	8.22	6.02	6.15	7.79	4.76	6.18	5.01	5.57	6.1	4.41	3.64	4.72	4.47	5.54	4.71	5.09	6.66	6.94	5.58	5.88	7.28	8.06	5.49	4.09	4.96	5.4	5.82	7.19	2.66	2.2	4.89	4.1	7	6.895	4.11	6.165	5.82
ENSMUSG00000022098.9	Bmp1	11.73	12.23	11.86	13.69	11.61	11.35	11.47	10.66	10.62	9.5	10.24	16.48	13.76	14.03	22.92	19.03	18.21	12.52	11.93	11.87	14.69	14.96	11.24	11.17	11.25	10.63	11.35	12.57	17.75	10.58	11.1	19.47	17.61	9.95	10.87	10.73	12.08	10.58	11.75	10.17	10.43	11.35	12.32	11.98	12.775	11.48	11.065	10.12
ENSMUSG00000032869.15	Psmf1	17.5	17.2	16.15	18.51	15.59	12.54	13.34	17.11	20.82	19.07	21.83	16.1	16.28	15.17	22.86	19.4	18.65	16.42	20.45	17.8	19.4	20.76	18.55	17.61	17.03	18.65	16.27	15.45	16.66	16.18	15.5	24.92	24.64	21.2	18.9	22.99	20.99	19.46	22.11	16.11	13.46	12.99	13.2	17.35	17.33	14.065	15.225	20.5733
ENSMUSG00000062906.12	Hdac10	6.82	7.27	7.81	6.12	5.92	6.56	5.13	5.36	6.31	7.03	6.7	8.19	7.35	7.08	11.25	7.12	7.27	8.45	7.11	8.86	4.91	4.33	7.09	6.51	6.03	5.52	5.17	2.98	6.26	5.44	5.5	11.9	10.19	6.84	7.6	6.62	6.7	5.75	7.61	1.93	3.16	5.54	5.4	7.045	6.965	6.24	5.245	6.68
ENSMUSG00000002372.8	Ranbp3	23.62	22.16	19.71	22.15	19.94	18.12	16.82	16.73	21.54	16.93	19.17	22.04	19.38	19.39	28.66	24.34	21.95	17.24	17.94	17.72	20.91	20.53	18.91	19.51	20.17	21.66	19.23	16.19	17.23	17.32	14.49	27.15	21.84	19.84	20.57	20.71	22.48	19.78	19.79	8.81	9.71	15.3	14.36	22.89	20.93	19.03	16.775	19.2133
ENSMUSG00000031834.15	Pik3r2	21.82	19.88	20.74	19.98	21.76	24.73	16.38	14.52	16.64	14.23	16.81	33.29	29.65	28.19	42.42	35.87	32.63	25.58	25.37	25.4	27.17	28.09	19.75	19.2	19.57	17.59	15.36	19.65	19.49	12.91	13	28.67	25.89	18.18	20.67	14.95	18.67	15.9	17.81	5.35	5.56	19.45	19.73	20.85	20.36	23.245	15.45	15.8933
ENSMUSG00000021039.8	Snw1	47.22	47.58	40.77	44.65	33.69	33.15	33.47	34.81	45.8	42.48	39.29	34.79	32.35	35.99	46.86	44.99	46.46	37.88	37.38	40.41	43.47	42.84	36.21	37.54	39.24	38.7	39.02	28.03	45.32	37.25	34.19	48.17	48.55	40.5	40.34	48.61	41.09	40.05	41.64	32.6	35.73	29.92	30.38	47.4	42.71	33.42	34.14	42.5233
ENSMUSG00000020366.18	Mapk9	4.05	4.32	4.36	4.58	4.03	3.09	2.79	2.38	4.14	4.43	4.49	8.49	4.76	8.11	8.71	10.15	8.22	4.14	3.92	5.57	5.89	6.58	2.94	3.26	2.87	3.54	2.65	2.89	4.69	2.66	3.49	7.43	9.73	4.18	3.09	4.66	3.97	4.46	4.31	3.29	4.51	2.59	3.34	4.185	4.47	3.56	2.585	4.35333
ENSMUSG00000020654.15	Adcy3	2.94	3.26	1.81	2.11	2.27	2.29	1.76	1.49	2.23	2.21	1.99	2.91	2.49	3.36	3.9	2.86	2.98	2.55	1.95	2.52	2.28	3.07	1.65	2.08	2.32	2.47	2.95	1.44	2.23	1.4	1.23	2.88	2.79	2.7	2.3	2.14	2	2.02	2.43	1.11	0.98	1.78	1.89	3.1	1.96	2.28	1.625	2.14333
ENSMUSG00000028071.12	Sh2d2a	0.25	0.16	0.27	0.19	0.07	0.36	0.12	0.15	0.16	0.2	0.07	0.88	0.3	0.85	0.96	0.23	0.62	0.28	0.71	0.63	0.41	0.36	0.25	0.13	0.11	0.21	0.11	0.4	0.08	0	0	0.17	0.47	0.04	0.28	0	0.28	0.11	0.12	0	0.02	0.13	0.31	0.205	0.23	0.215	0.135	0.143333
ENSMUSG00000030726.15	Pold3	9.05	11.8	19.43	8.97	9.66	5.03	12.17	8.97	9.06	23.12	17.67	6.62	10.16	7.04	22.19	10.43	11.45	6.42	6.86	7.59	6.68	6.37	6.44	7.07	13.21	6.63	8.72	4.38	7.27	7.65	7.76	13.45	14.67	14.58	14.5	10.53	7.76	7.18	11.85	5.09	8.55	4.76	7.48	10.425	14.2	7.345	10.57	16.6167
ENSMUSG00000037664.12	Cdkn1c	9.15	9.69	8.83	16.58	19.15	6.99	8.8	7.27	10.67	10.06	10.21	36.93	26.19	32.99	33.62	38.97	28.15	12.35	14.23	12.79	53.23	56.39	9.78	8.81	8.12	9.56	8.55	19.09	24.43	9.59	10.29	27.52	29.81	7.11	6.7	6.97	7.34	6.72	9.68	5.52	6.89	11.74	11.59	9.42	12.705	13.07	8.035	10.3133
ENSMUSG00000002603.15	Tgfb1	1.08	1.66	1.6	1.95	1.93	1.08	1.13	1.59	2.23	1.59	1.68	2.44	1.58	2.13	2.47	2.82	2.81	2.27	1.41	2.06	2.77	1.83	1.65	2.21	2.15	3.51	2.05	1.68	3.96	1.64	1.69	2.84	1.93	0.83	1.98	1.11	1.11	0.94	1.21	0.69	0.52	1.47	2.12	1.37	1.775	1.505	1.36	1.83333
ENSMUSG00000029528.17	Pxn	6.95	7.08	6.65	8.15	7.24	4.4	7.46	8.99	8.98	8.2	7.99	9.07	5.91	9.62	14.43	13.48	10.48	9.12	9.33	10.03	10.14	13.29	6.71	7.74	7.71	7.73	7.88	3.33	9.37	8.11	8.56	13.06	11.25	8.21	7.85	8.87	8.91	8.08	8.19	2.25	2.42	6.76	6.16	7.015	7.4	5.82	8.225	8.39
ENSMUSG00000020167.14	Tcf3	25.16	22.85	19.3	27.43	30.71	21.87	15.76	14.81	23.99	21.6	22.83	23.99	23.83	23.65	46.04	43.89	38.3	27.32	31.98	31.12	31.08	39.11	26.1	26.84	25.27	24.48	18.49	15.93	23.55	16.79	16.27	39.48	36.81	24.15	25.83	21.34	22.19	21.29	23.49	8.56	9.66	18.2	17.6	24.005	23.365	26.29	15.285	22.8067
ENSMUSG00000020516.15	Rps6kb1	19.03	23.52	19.83	20.87	14.12	13.73	14.18	13.84	23.66	22.06	18.18	16.61	16.06	16.59	27.03	31.44	30.63	18.89	22.85	23.36	24.49	14.77	18.91	19.52	19.17	20.68	18.39	11.1	15.52	17.89	15.87	27.6	33.35	19.45	17.47	22.24	20.65	21.87	21.33	21.16	22.55	12.66	16.29	21.275	20.35	13.925	14.01	21.3
ENSMUSG00000021823.9	Vcl	3.8	4.1	3.08	3.71	1.77	2.42	2.56	2.51	3.95	3.17	3.55	3.75	2.58	3.54	4.22	5.59	3.74	4.76	3.57	4.88	2.29	3.75	2.7	2.74	3.08	2.96	2.52	1.12	3.69	2.48	3.22	6.1	5.82	3.59	4.06	3.38	3.52	3.54	2.9	0.94	0.88	2.38	2.94	3.95	3.395	2.095	2.535	3.55667
[truncated: 13 more columns]

## Sheet: Activator, Ventral+Dorsal
Gene_ID	Gene_Name	CCT1	CCT2	CEA1	CEA2	CMA1	CMA2	CLA1	CLA2	CC1	CC2	CC3	CRT1	CRT2	CRT3	VCT1	VCT2	VCT3	VEA1	VEA2	VEA3	VMA1	VMA2	VLA1	VLA2	VLA3	VC1	VC2	VRT2	VRT1	DCT1	DCT2	DEA1	DEA2	DMA1	DMA2	DMA3	DLA1	DLA2	DLA3	DC2	DC1	DRT2	DRT1	mean.CCT	mean.CEA	mean.CMA	mean.CLA	mean.CC
ENSMUSG00000020573.16	Pik3cg	0.35	0.4	0.27	0.39	0.4	0.21	0.3	0.41	0.29	0.38	0.32	1.54	1.15	1.62	0.53	0.34	0.72	1.07	0.82	1.05	0.4	0.41	0.37	0.36	0.23	0.28	0.28	0.56	1.04	0.48	0.27	0.77	0.89	0.13	0.53	0.22	0.19	0.18	0.19	0.16	0.15	0.71	0.76	0.375	0.33	0.305	0.355	0.33
ENSMUSG00000020788.15	Atp2a3	1.36	1.73	1.31	0.98	0.51	1.02	0.83	0.72	0.46	0.65	0.51	2.37	1.93	2.31	1.65	1.63	1.83	3.46	3.58	3.61	0.62	1.06	0.84	0.69	0.68	0.65	0.46	0.74	1.18	0.74	0.62	2.09	2.24	0.42	0.61	0.52	0.72	0.66	0.97	0.39	0.25	0.98	1.17	1.545	1.145	0.765	0.775	0.54
ENSMUSG00000030865.4	Chp2	1.24	1.59	1.68	1.76	0.88	0.81	1.88	1.26	1.18	1.4	1.56	4.41	3.12	4.4	2.06	2.17	2.43	7.12	4.96	5.53	2.41	1.86	0.99	1.25	1.28	1.34	0.63	3.11	2.96	1.8	1.61	2.93	3.15	0.45	0.93	1.02	0.53	0.88	0.9	1.03	0.08	1.6	0.95	1.415	1.72	0.845	1.57	1.38
ENSMUSG00000027314.6	Dll4	0.57	0.75	0.32	0.74	0.27	0.29	0.36	0.46	0.45	0.65	0.29	0.77	0.86	0.84	0.94	0.82	0.76	1.83	1.72	1.84	0.61	1.12	0.82	0.62	0.36	0.54	0.53	0.68	0.55	0.38	0.34	0.94	0.83	0.7	0.58	0.32	0.47	0.37	0.51	0.08	0.27	0.35	0.67	0.66	0.53	0.28	0.41	0.463333
ENSMUSG00000031380.10	Figf	2.49	2.79	2.4	1.49	0.94	2.29	2.39	2.17	1.54	1.31	1.11	3.46	3.35	4.19	2.73	3.81	2.56	6.16	5.49	7.43	1.96	2.38	1.17	1.49	1.3	1.96	1.3	2.41	3.34	2.21	2.44	3.15	3.61	2.04	0.67	1.74	1.81	2.03	1.73	1.79	1.57	2.65	2.64	2.64	1.945	1.615	2.28	1.32
ENSMUSG00000041120.6	Nbl1	36.32	36.16	36.97	36.47	40.34	36.26	35.72	32.64	29.89	28.49	28.69	134.71	84.75	123.76	106.71	89.35	75.76	87.72	91.81	93.82	70.82	75.19	39.44	42.32	37.07	28.17	26.66	73.83	85.72	30.99	31.34	54.24	46.54	23.42	22.83	21.79	31.99	31.41	32.39	12.03	12.56	52.58	55.3	36.24	36.72	38.3	34.18	29.0233
ENSMUSG00000025647.16	Shisa5	50.12	49.08	38.24	39.55	37.05	36.83	33.82	35.22	35.04	33.87	32	83.1	71.49	86.66	80.09	64.37	65.22	71.58	75.13	79.08	46.79	41.92	35.5	32.98	35.46	28.92	29.24	54.97	60.17	32.35	32.63	54.88	47.07	34.66	32.51	36.03	44.16	37.68	39.82	10.57	11.33	40.65	39.92	49.6	38.895	36.94	34.52	33.6367
ENSMUSG00000057342.13	Sphk2	26.06	25.2	24.83	20.09	16.12	21.63	17.9	17.28	20.84	19.02	17.45	29.03	25.65	27	30.43	23.7	23.4	35.13	32.61	38.11	18.18	18.47	22.53	23.82	24.6	19.31	16.51	14.69	27.49	16.5	15.68	26.86	23.57	20.57	21.59	19.72	22.07	21.8	19.94	9.47	8.83	24.01	22.21	25.63	22.46	18.875	17.59	19.1033
ENSMUSG00000034771.15	Tle2	9.84	6.09	7.77	4.97	5.44	3.95	3.58	4.06	4.67	2.86	4.91	9.1	10.92	10.55	6.21	6.39	8.58	13.34	10.26	15.35	3.23	2.24	4.83	5.35	5.35	2.99	2.85	8.54	9.66	4.13	3.12	8.72	5.96	1.81	3.58	3.23	3.57	3.13	3.99	3.12	2.27	14.69	13.85	7.965	6.37	4.695	3.82	4.14667
ENSMUSG00000032715.9	Trib3	5.2	3.97	2.75	2.43	3.84	2.32	1.99	1.33	2.01	1.91	1.67	4.02	4.63	3.35	4.13	3.22	3.91	5.91	8.37	5.82	2.83	3.24	1.52	1.99	2.61	1.42	1.27	1.96	3.53	1.49	1.56	3.1	2.12	1.65	2.47	1.76	2.52	2.22	1.82	0.53	0.62	2.36	3.34	4.585	2.59	3.08	1.66	1.86333
ENSMUSG00000046223.10	Plaur	3.02	2.68	3.01	3.93	4.11	4.24	3.32	3.11	3.54	2.82	2.37	8.14	6.54	9.62	7.03	7.67	5.58	3.96	5.98	5.7	4.77	5.71	2.32	2.3	2.07	2.5	2.58	3.82	5.15	3.8	3.89	3.43	3.62	0.93	1.49	2.13	2.35	2.57	2.93	1.32	1.54	1.99	3.33	2.85	3.47	4.175	3.215	2.91
ENSMUSG00000030681.18	Mvp	18.42	16.42	15.15	14.7	12.15	14.38	15.55	15.58	17.03	16.48	15.2	32.97	22.78	29.74	18.99	18.63	16.83	23.99	25.56	25.04	14.76	12.65	16.17	16.06	16.86	13.68	11.94	14.78	29	16.08	16.95	17.12	16.5	13.64	14.16	12.36	14.31	14.74	15.06	8.35	7.55	16.42	18.44	17.42	14.925	13.265	15.565	16.2367
ENSMUSG00000025902.13	Sox17	1.78	1.25	1.47	1.09	0.94	0.91	1.05	1.14	1.32	1.03	0.87	7.17	3.81	3.61	3.19	3.13	2.61	11.71	9.02	10.08	3.2	3.82	1.73	1	1.27	1.54	1.48	1.71	3.01	1.31	1.45	2.72	2.74	0.76	1.17	0.58	1.16	1.08	1.26	0.54	0.22	1.14	0.97	1.515	1.28	0.925	1.095	1.07333
ENSMUSG00000028978.12	Nos3	0.73	0.66	0.86	0.75	0.48	0.45	0.55	0.83	0.67	0.73	0.56	1.46	1.02	1.51	1.22	1.33	1.03	2.38	2.8	2.03	0.81	0.86	0.66	0.29	0.48	0.56	0.57	0.85	1.47	0.88	0.88	1.46	0.94	0.26	0.51	0.33	0.71	0.57	0.48	0.39	0.55	0.81	0.57	0.695	0.805	0.465	0.69	0.653333
ENSMUSG00000022747.16	St3gal6	5.87	3.98	3.01	4.44	4.59	2.41	3.97	2.95	2.92	4.13	3.66	11.37	8.22	14.76	6.89	6.37	5.03	5.55	6.83	8.52	4.19	2.73	3.78	2	2.93	2.67	3.98	2.75	5.84	3.42	3.83	11.87	8.46	3.69	5.39	4.99	2.72	2.85	2.84	4.5	5.36	3.74	4.1	4.925	3.725	3.5	3.46	3.57
ENSMUSG00000023328.14	Ache	1.79	1.92	2.29	1.42	0.89	1.34	1.04	0.66	1.34	0.63	1.35	5.75	5.37	5.37	1.81	1.84	1.38	3.75	3.12	3.14	0.96	1.39	0.94	1.23	1.39	0.54	0.54	1.38	1.18	0.61	0.83	3.1	3.3	0.96	1.25	0.7	0.69	0.73	0.89	0.23	0.33	1.77	2.8	1.855	1.855	1.115	0.85	1.10667
ENSMUSG00000000530.16	Acvrl1	4.66	2.67	2.4	2.07	2.37	1.85	3.23	3.26	1.96	2.42	2.45	8.51	6.44	6.69	4.46	4.29	4.18	6.25	6.95	5.89	2.89	2.73	1.85	2.61	1.89	1.67	1.87	3.85	4.67	3.3	2.79	5.13	4.48	1.95	1.63	1.83	2.09	2.74	2.32	1.06	1.58	2	2.99	3.665	2.235	2.11	3.245	2.27667
ENSMUSG00000007655.16	Cav1	82.94	74.94	54.33	53.14	28.75	31.34	40.45	39.67	43.79	44.21	37.81	108.54	94.8	115.53	107.63	107.16	95.2	126.77	130.69	123.21	48.85	53.91	33.02	33.55	35.64	27.19	29.82	45.11	112.36	41.27	41.96	119.49	125.73	30.48	34.78	34.39	37.85	42.33	40.02	42.65	42.54	42.95	48.95	78.94	53.735	30.045	40.06	41.9367
ENSMUSG00000053226.6	Dand5	1.27	0.95	0.53	1.6	1.43	0.95	1.33	1.28	1.66	1.15	0.8	3.19	2.9	2.81	2.27	1.51	1.27	1.48	1.92	1.86	1.23	1.27	1.57	1.34	1.11	0.81	1.35	1.52	1.61	1.4	1.41	2.13	2.32	1.43	1.63	0.98	1.98	1.44	1.59	1.18	1.23	0.94	0.9	1.11	1.065	1.19	1.305	1.20333
ENSMUSG00000023000.4	Dhh	1.29	0.9	0.51	0.96	0.55	0.95	0.43	0.5	0.52	0.46	0.51	1.7	1.23	1.63	1.18	1.41	0.94	1.66	2.12	2.17	0.65	1.08	0.57	0.92	0.94	0.37	0.46	1.01	1.4	0.57	0.49	1.5	1.1	0.66	0.43	1.03	0.86	0.68	0.87	0.09	0.26	0.66	0.8	1.095	0.735	0.75	0.465	0.496667
ENSMUSG00000030772.5	Dkk3	16.87	14.66	10.65	9.52	8.99	9.16	6.87	7.23	9.17	8.18	9.01	16.63	12.71	16.21	18.06	16.47	14.48	18.22	20.77	20.19	13.33	16.59	11.29	10.23	11.75	7.49	7.3	7.12	11.59	6.81	6.64	20.12	18.76	13.57	12.57	11.58	10.58	10.62	10.05	7.13	6.28	7.12	7.21	15.765	10.085	9.075	7.05	8.78667
ENSMUSG00000039982.7	Dtx4	1.12	1.41	1.13	1.03	0.35	0.45	0.69	0.8	0.63	0.73	0.72	2.51	1.7	2.32	2.42	2.63	2.09	3.26	3.86	2.74	1.29	1.54	0.59	0.61	0.6	0.55	0.81	1.44	1.87	0.83	0.91	1.87	2.06	0.69	0.58	0.64	0.79	0.9	0.58	0.79	0.79	1.22	1.26	1.265	1.08	0.4	0.745	0.693333
ENSMUSG00000031328.15	Flna	49.7	42.93	42.22	43.28	34.45	33.38	35.66	34.58	38.12	40.16	39.74	44.95	40.49	40.66	60.14	63.36	54.25	59.21	57.21	60.89	34.25	37.88	33.51	33.78	39.16	32.85	37.25	40.71	64.46	38.98	38.34	59.07	64.85	36.15	42.12	41.27	49.07	52.29	47.5	28.22	29.54	38.02	37.55	46.315	42.75	33.915	35.12	39.34
ENSMUSG00000060572.17	Mfap2	63.32	63.07	53.26	71.17	35.28	28.83	49.63	41.4	31.12	31.15	31.52	128.37	69.33	119.41	229.99	196.13	167.16	112.17	112.28	124.62	123.2	137.43	33.5	34.19	37.31	30.89	28.76	109.51	86.55	44.09	41.95	206.77	161.07	28.98	28.91	22.31	41.85	41.81	41.05	15.8	11.2	44.35	41.08	63.195	62.215	32.055	45.515	31.2633
ENSMUSG00000032475.15	Nck1	23.75	21.81	14.15	12.99	11.81	10.97	13.96	11.48	15.35	16.69	13.08	22.97	22.94	24.48	20.79	26.11	20.48	25.73	28.19	30.28	20.62	18.15	13.87	15.24	17.65	15.14	12.05	19.41	21.16	12.97	12.89	23.1	23.57	14.09	16.21	17	17.44	14.51	16.04	20.06	21.41	15.98	16.61	22.78	13.57	11.39	12.72	15.04
ENSMUSG00000063160.12	Numbl	3.42	3.09	3.08	2.53	3.13	3.21	3.26	2.64	2.3	2.39	2.11	5.37	3.59	5.17	6.07	5.62	4.97	4.04	3.99	4.15	3.36	3.67	2.58	3.09	2.66	2.33	2.17	3.51	4.06	3.03	2.68	4.02	4	2	1.73	1.54	1.74	2.01	2.5	1.02	1.06	2.33	3.29	3.255	2.805	3.17	2.95	2.26667
ENSMUSG00000019969.13	Psen1	28.2	28.89	24.87	20.79	18.23	18.73	17.41	18.88	27.42	28.92	28.93	27.1	24.2	26.22	29.66	31.29	32.07	32.87	33.77	35.2	20.75	23.13	25.76	25.07	26.37	20.24	20.86	13.09	25.08	18.98	20.28	37.11	36.49	28.12	31.69	32.03	29.12	26.21	26.93	12.56	11.65	24.68	21.49	28.545	22.83	18.48	18.145	28.4233
ENSMUSG00000042626.13	Shc1	15.22	14.97	14.07	14.43	8.94	9.24	11.03	11.15	15.57	12.99	14.7	14.09	13.13	14.46	23.12	20.21	21.64	16.61	15.71	16.77	14.47	16.08	12.46	13.25	12.72	12.81	11.51	5.86	13.89	10.2	10.07	24.1	23.32	15.01	15.73	15.06	13.7	13.56	11.95	6.5	7.51	9.96	10.03	15.095	14.25	9.09	11.09	14.42
ENSMUSG00000020919.11	Stat5b	3.73	3.38	3.52	2.99	1.4	2.45	2.26	2.47	2.31	2.39	2.59	6.05	5.48	6.65	5.82	4.84	4.67	5.11	5.57	4.72	2.93	3.11	2.66	2.36	2.97	2.24	1.78	2.34	4.43	2.56	2.28	6.28	6.32	2.41	2.6	2.44	2.31	2.48	2.64	3.12	2.73	3.13	3.25	3.555	3.255	1.925	2.365	2.43
ENSMUSG00000039239.14	Tgfb2	3.57	4.33	3.02	3.69	2.58	3.89	3.01	3.17	3.8	2.55	2.75	8.74	5.91	7.79	4.92	5.43	5.12	6.51	6.43	5.34	5.28	6.18	4.61	3.27	3.35	2.89	2.53	3.99	7.55	3.19	3.43	7.08	7.33	3.87	2.52	2.49	2.29	2.4	2.3	2.82	2.73	5.1	4.18	3.95	3.355	3.235	3.09	3.03333
ENSMUSG00000032440.12	Tgfbr2	8.28	7.98	6.45	7.25	4.03	3.62	7.2	6.81	4.76	5.15	5.01	13.65	10.96	13.51	14.91	16.25	14.1	9.4	10.63	10.12	8.25	7.35	5.71	5.63	4.76	4.2	4.82	7.87	11.63	6.57	6.74	12.98	12.96	4.69	3.7	5.03	5.44	4.99	5.59	7.07	7.36	5.95	6.16	8.13	6.85	3.825	7.005	4.97333
ENSMUSG00000023885.8	Thbs2	4.82	4.21	3.42	3.53	2.01	2.21	4.59	4.28	2.44	2.63	2.94	11.57	7.13	11.65	8.41	8.05	6.94	5.48	5.58	5.73	6.47	5.58	3.06	2.72	3.6	2.52	2.54	4.92	9	4.49	4.65	9.7	8.45	2.42	3.02	3.24	3.36	3.46	3.35	3.39	3.32	3.92	3.77	4.515	3.475	2.11	4.435	2.67
ENSMUSG00000031520.5	Vegfc	1.11	0.89	0.57	0.87	0.84	0.43	0.55	0.78	0.53	0.59	0.33	1.57	1.58	1.5	1.91	2.26	1.72	1.6	1.12	1.61	1.63	1.39	0.67	0.59	0.66	0.74	0.74	0.98	0.88	0.58	0.29	1.37	1.66	0.84	0.43	0.64	0.75	0.38	0.75	0.92	0.62	0.43	0.63	1	0.72	0.635	0.665	0.483333
ENSMUSG00000055866.9	Per2	0.22	0.2	0.19	0.48	0.48	0.99	0.41	0.38	0.22	0.34	0.31	0.7	1.14	0.71	1.6	0.32	1.19	1.24	1.01	1.15	0.73	0.53	0.38	0.2	0.24	0.24	0.35	0.09	0.17	0.37	0.36	0.33	1.47	0.27	0.29	0.31	0.29	0.29	0.21	0.28	0.2	0.17	0.09	0.21	0.335	0.735	0.395	0.29
ENSMUSG00000040913.10	Fbxw4	4.88	5.97	4.68	4.47	5.16	5.47	4.69	4.17	4.13	3.78	5.78	7.54	7.73	7.18	8.45	5.01	4.33	7.92	5.11	4.03	3.21	3.02	3.78	4.71	5.02	5.38	6.5	8.43	5.38	3.99	3.92	5.8	10.65	6.86	4.07	4.04	4.77	4.16	4.18	4.23	6.2	5.43	6.37	5.425	4.575	5.315	4.43	4.56333
ENSMUSG00000022220.13	Adcy4	0.58	0.75	0.84	0.89	0.34	0.53	0.81	0.87	0.38	0.64	0.8	1.49	0.87	1.51	1.5	1.18	1.36	2.77	3.19	3.07	0.53	0.79	0.55	0.6	0.4	0.48	0.49	0.3	1.7	0.75	0.93	1.56	1.7	0.42	0.52	0.56	0.49	0.52	0.63	0.31	0.58	0.71	0.93	0.665	0.865	0.435	0.84	0.606667
ENSMUSG00000034165.16	Ccnd3	47.55	36.69	34.48	43.1	39.89	30.7	31.9	32.97	35.1	30.63	30.57	66.02	51.47	60.68	76.57	62.15	50.75	63.79	57.33	66.54	63.88	73.02	36.17	34.85	34.16	34.65	35.15	44.65	57.86	31.14	34.91	58.72	52.43	32.6	31.02	30.16	36.16	37.43	37.07	12.01	13.6	37.15	38.04	42.12	38.79	35.295	32.435	32.1
ENSMUSG00000000440.12	Pparg	6.75	6.31	6.28	6	5.06	3.23	8.16	7.46	4.29	5.69	6.07	15.2	13.15	14.65	14.66	12.37	14.1	16.07	17.44	19.76	7.57	7.2	2.88	2.76	2.67	5.01	3.7	12.03	17.36	7.73	6.99	12.38	12.01	3.28	2.62	2.36	4.17	3.87	4.19	6.43	5.75	3.15	3.59	6.53	6.14	4.145	7.81	5.35
ENSMUSG00000024338.14	Psmb8	35.11	30.5	13.38	24.07	32.11	21.21	25.18	20.46	15.51	13.2	15.65	109.64	84.03	85.89	57.98	50.4	42.06	37.43	42.61	40.43	20.91	16.81	24.91	23.32	22.75	15.07	11.49	61.04	40.84	23.48	25.18	31.74	32.96	16.91	18.51	13.71	18.51	16.02	19.45	9.62	10.1	20.5	23.91	32.805	18.725	26.66	22.82	14.7867
ENSMUSG00000036743.3	Psma8	0.14	0.04	0.1	0.05	0.15	0	0.09	0.04	0.05	0.04	0.05	0.25	0	0.24	0.05	0.16	0.04	0.14	0.05	0.08	0	0.07	0	0	0	0.23	0	0.04	0.23	0.04	0.16	0.31	0.22	0.13	0.07	0.1	0.15	0.08	0.13	0	0.25	0.02	0.03	0.09	0.075	0.075	0.065	0.0466667
ENSMUSG00000049551.2	Fzd9	1.08	0.84	0.71	0.62	0.36	0	0.57	0.23	0.54	0.45	0.3	3.15	1.55	2.86	0.96	0.82	0.85	0.72	0.66	0.76	0.18	0.23	0.44	0.31	0.33	0	0.09	0.53	0.35	0.4	0.39	1.28	1.65	0.41	0.34	0.45	0.07	0.2	0.15	0.28	0.14	0.56	0.74	0.96	0.665	0.18	0.4	0.43
ENSMUSG00000032487.8	Ptgs2	0.68	0.6	0.63	0.38	0.28	0.35	0.25	0.3	0.5	0.47	0.56	0.78	1.51	0.6	0.45	1.25	0.59	1.09	0.95	1.2	0.16	0.11	0.43	0.44	0.52	0.45	0.32	0.36	0.8	0.44	0.25	0.96	1.1	0.36	0.32	0.49	0.59	0.46	0.67	0.6	0.49	0.95	1.05	0.64	0.505	0.315	0.275	0.51
ENSMUSG00000027860.15	Vangl1	9.7	10.22	9.28	8.3	7.95	8.65	9.47	7.87	10.48	9.54	9.57	12.93	7.91	11.31	13.69	13.32	10.71	12.88	10.89	11.49	7.14	10.11	10.42	9.23	9.78	8.54	8.2	7.09	9.75	8.9	10.28	12.32	13.73	9.55	9.66	10.59	9.49	8.85	8.81	6.55	5.83	10.01	10.46	9.96	8.79	8.3	8.67	9.86333
ENSMUSG00000020623.11	Map2k6	3.23	3.11	2.96	3.28	2.55	3.51	2.43	2.04	3.29	2.75	3.15	4.08	2.79	3.97	3.56	4.29	3.55	4.32	3.76	3.28	2.51	2.6	3.16	3.38	3.07	2.54	2.63	1.79	3.19	1.9	2.34	4.83	5.31	3.66	2.43	2.78	2.9	3.91	3.7	2.52	2.78	2.18	2.78	3.17	3.12	3.03	2.235	3.06333
ENSMUSG00000025217.14	Btrc	1.72	1.41	1.37	1.49	1.05	1.13	1.24	1.23	1.27	1.37	1.28	2.47	2.05	2.66	2.09	2.02	2.14	1.78	1.86	1.58	1.09	1.5	0.87	1.47	1.13	1.2	0.92	1.2	2.08	1.21	1.05	2.48	2.35	1.37	1.58	1.3	1.6	1.36	1.4	1.12	1.13	1.26	1.2	1.565	1.43	1.09	1.235	1.30667
ENSMUSG00000002227.15	Mov10	1.34	1.61	1.35	1.52	0.79	0.67	1.12	1.35	1.38	0.86	0.85	1.61	1.02	1.72	1.8	1.49	1.18	1.96	1.37	1.87	0.92	0.82	0.64	0.61	0.91	1	0.74	0.85	1.93	1.12	1.01	1.91	1.99	0.58	1.26	0.97	0.88	0.56	0.53	0.48	0.38	0.88	0.53	1.475	1.435	0.73	1.235	1.03
ENSMUSG00000025855.13	Prkar1b	0.93	0.48	0.51	0.95	0.14	1.75	0.12	1.13	0.23	0.73	0.76	2.55	0.92	1.09	2.93	0.97	1.5	0.9	1.42	1.35	0.72	1.23	0.97	0.32	0.36	0.4	0.24	0.9	0.96	0.37	0.85	1.67	2.7	0.58	1.24	0.16	0.8	1.36	0.47	1.29	0.8	1.06	0.32	0.705	0.73	0.945	0.625	0.573333
ENSMUSG00000015468.14	Notch4	0.49	0.41	1.01	0.69	1.96	1.91	0.61	0.53	1.04	1.28	0.4	1.56	2.09	0.5	0.81	1.59	1.22	1.59	1.51	2.22	0.79	2.39	0.85	1.25	1.98	1.03	0.59	0.41	1.16	0.81	0.38	0.85	1.44	0.45	0.29	0.49	0.69	0.61	0.57	0.23	0.6	0.58	1.07	0.45	0.85	1.935	0.57	0.906667
[truncated: 13 more columns]

## Sheet: Activator, Chin+Dorsal
Gene_ID	Gene_Name	CCT1	CCT2	CEA1	CEA2	CMA1	CMA2	CLA1	CLA2	CC1	CC2	CC3	CRT1	CRT2	CRT3	VCT1	VCT2	VCT3	VEA1	VEA2	VEA3	VMA1	VMA2	VLA1	VLA2	VLA3	VC1	VC2	VRT2	VRT1	DCT1	DCT2	DEA1	DEA2	DMA1	DMA2	DMA3	DLA1	DLA2	DLA3	DC2	DC1	DRT2	DRT1	mean.CCT	mean.CEA	mean.CMA	mean.CLA	mean.CC
ENSMUSG00000040040.16	Ift88	5.62	5.61	9.21	5.72	3.73	4.8	2.74	2.48	5.08	4.31	5.19	4.28	5.82	5	5.62	5.52	4.53	2.45	3.88	4.57	3	1.68	3.39	4.68	3.77	3.47	4	1.71	5.1	1.9	2.79	3.91	5.66	4.76	3.3	3.4	2.49	2.4	2.42	2.77	3.61	3.67	3.41	5.615	7.465	4.265	2.61	4.86
ENSMUSG00000045273.8	Cenph	14.13	12.51	9.24	14.32	10.95	6.22	6.79	5.91	8.5	8.55	7.84	3.21	3.65	4.03	13.79	14.59	13.28	6.76	5.37	5.41	8.84	9.02	6.58	7.08	7.03	9.07	7.46	3.51	3.29	5.33	8.54	16.82	17.12	6.33	10.77	7.84	9.33	8.67	9.34	16.54	17.18	2.97	3.46	13.32	11.78	8.585	6.35	8.29667
ENSMUSG00000071847.12	Apcdd1	20.59	17.38	15.96	16.94	8.58	8.12	8.38	7.67	10.06	10.39	10.74	11.52	9.7	11.09	16.61	14.38	15.05	13.28	10.87	10.99	11.85	11.06	11.5	10.92	11.16	10.27	10.19	7.24	12.06	7.07	7.71	19.06	14.58	10.36	9.29	10.75	12.16	11.7	10.76	10.58	9.48	8.94	8.61	18.985	16.45	8.35	8.025	10.3967
ENSMUSG00000020176.17	Grb10	3.47	3.2	2.58	3.49	2.04	2.05	2.52	3.01	1.72	2.11	2.19	6.04	4.92	6.13	5.59	6.42	5.8	3.64	4.11	4.51	3.92	4.45	1.62	1.6	1.5	2.64	2.18	2.49	3.2	2.49	2.74	8.04	7.84	1.69	1.83	1.74	1.7	2.01	2.06	4.16	4	1.54	1.83	3.335	3.035	2.045	2.765	2.00667
ENSMUSG00000032216.14	Nedd4	82.37	97.34	78.09	83.89	62.28	51.11	52.51	65.87	69.34	71.69	71.62	75.76	64.99	79.08	86.3	88.07	85.23	72.62	75.61	68.2	68.36	63.41	61.67	64.52	61.21	63.09	69.6	59.28	67.96	59.31	59.5	110.47	113.08	67.93	68.02	73.85	65.12	64.01	63.53	84.24	86.43	56.46	57.26	89.855	80.99	56.695	59.19	70.8833
ENSMUSG00000042988.10	Notum	6.03	7.67	7.3	9.83	9.14	5.2	4.56	4	8.38	6.19	7.74	5.93	6.63	6.97	13.82	12.34	9.8	3.21	3.13	2.87	5.99	7.73	6.87	7.18	6.81	6.51	4.8	4.47	4.98	3.72	3.82	12.85	14.17	5.55	6.14	4.24	4.86	5.79	4.06	2.33	3.6	4.65	7.3	6.85	8.565	7.17	4.28	7.43667
ENSMUSG00000059409.8	Ppp2r5d	12.69	11.56	12	14.51	10.87	9.25	7.32	7.74	10.23	7.7	9.88	12.87	11.43	10.66	20.17	17.24	15.99	8.6	8.73	9.66	10.77	12.68	9.82	9.32	10.08	8.8	9.56	8.04	9.53	8.4	7.82	19.83	16.37	10.99	10.61	10.58	11.82	11.32	11.33	5.7	7.42	6.97	6.81	12.125	13.255	10.06	7.53	9.27
ENSMUSG00000038482.10	Tfdp1	25.57	27.09	20.41	29.03	24.51	13.22	13.55	12.93	23.38	25.88	23.7	15.41	14.12	13.96	36.52	43.24	38.06	14.56	12.73	15.69	23.45	30.2	20.5	22.05	19.66	18.62	16.3	4.25	13.69	14.35	12.29	41.76	43.37	24.16	24.43	26.5	24.92	24.8	25.94	12.43	13.58	9.26	9.38	26.33	24.72	18.865	13.24	24.32
ENSMUSG00000029363.14	Rfc5	12.06	14.07	12.1	16.28	13.75	11.45	8.38	8.62	11.5	10.7	12.04	6.33	7.49	9.02	20.1	21.7	18.96	8.23	8.17	7.46	18.68	17.96	12.29	9.78	11.05	10.77	13.62	7	6.77	8.06	8.2	17.57	17.26	14.89	12.45	12.47	12.22	14.11	14.05	10.81	11.95	5.4	5.85	13.065	14.19	12.6	8.5	11.4133
ENSMUSG00000005124.9	Wisp1	3	2.79	2.52	3.29	2.15	1.16	1.98	1.67	2.6	1.87	1.81	3	2.35	3.52	5.95	5.67	3.97	1.65	2.94	2.57	3.91	4.46	2.11	1.6	1.37	0.93	1.47	3.66	3.73	2.57	2.43	4.54	4.08	2.3	1.76	1.61	2.1	1.67	2.16	1.45	1.66	2.03	1.95	2.895	2.905	1.655	1.825	2.09333
ENSMUSG00000020866.17	Cacna1g	0.68	0.79	0.92	0.84	0.59	0.87	0.21	0.25	0.31	0.61	0.6	1.23	0.33	1.23	1.05	1.07	1.21	0.45	0.22	0.17	0.58	0.34	0.44	0.19	0.21	0.4	0.3	0.71	0.63	0.08	0.14	2.48	1.05	0.48	0.82	0.74	0.53	0.91	0.45	0.13	0.32	0.19	0.42	0.735	0.88	0.73	0.23	0.506667
ENSMUSG00000027004.3	Frzb	1.53	1.18	0.71	1.46	1.14	0.94	0.79	0.59	0.56	0.8	0.67	2.27	1.44	1.64	1.04	1.87	0.84	0.47	0.3	0.43	0.38	0.66	0.8	0.92	0.84	0.46	0.37	0.24	0.68	0.62	0.72	1.61	1.08	0.93	0.7	0.54	0.45	0.68	0.68	0.66	0.9	0.85	1.05	1.355	1.085	1.04	0.69	0.676667
ENSMUSG00000039542.15	Ncam1	3.87	4.22	2.54	6.19	3.5	1.89	2.12	2.1	2.68	2.48	1.88	5.35	3.14	5.68	10.5	12.14	12.53	3.88	3.21	3.58	7.33	7.25	1.62	2.24	2.3	2.95	2.41	2.02	3.46	2.15	2.39	8.46	7.95	2.76	2.82	4.18	3.82	3.56	3.1	1.88	1.88	1.48	1.41	4.045	4.365	2.695	2.11	2.34667
ENSMUSG00000034245.10	Hdac11	4.61	3.68	5.64	4.97	2.83	4.47	2.35	3.13	3.39	3.56	2.42	3.07	2.69	3.63	5.49	5.18	5.15	3.69	3.46	4.28	2.32	6.99	3.22	3.36	5.14	4.23	3.67	1.9	4.31	3.1	3.53	5.37	5.15	4.33	3.9	3.16	4.13	3.98	3.72	2.3	2.58	3.11	2.88	4.145	5.305	3.65	2.74	3.12333
ENSMUSG00000040680.8	Kremen2	8.03	6.59	7.12	6.01	4.66	4.91	2.29	1.87	2.02	2.84	3.1	4.3	4.37	2.6	10.52	9.05	8.38	3.56	4.27	3.88	4.54	6.48	3.21	3.1	3.18	4.24	3.12	2.39	1.55	2.08	2.41	8.61	6.63	3.63	3.06	2.95	3.03	2.89	3.36	1.53	1.16	2.23	2.08	7.31	6.565	4.785	2.08	2.65333
ENSMUSG00000021732.14	Fgf10	1.68	1.42	1.67	2.23	0.93	0.49	0.86	0.76	0.81	0.82	0.45	1.04	1.11	1.4	1.95	2.01	1.81	0.6	0.69	0.35	0.43	0.52	0.71	0.53	0.41	0.55	0.63	0.95	2.09	1.05	1.01	1.76	1.31	0.9	1.05	0.79	0.68	0.94	0.85	1.55	1.47	0.36	0.41	1.55	1.95	0.71	0.81	0.693333
ENSMUSG00000041238.15	Rbbp8	12.14	11.76	10.38	9.98	6.39	8.17	4.72	4.51	6.12	6.81	6.65	8.58	7.85	8.9	10.13	12.33	10.78	7.28	7.63	7.69	7.17	7.19	7.2	7.25	7.3	5.77	6.99	5.12	5.25	4.57	4.89	13.4	14.52	7.75	8.56	8.67	7.26	7.49	7.86	10.08	10.61	6.11	6.48	11.95	10.18	7.28	4.615	6.52667
ENSMUSG00000096472.1	Cdkn2d	28.89	25.15	19.44	26.21	18.38	12.61	14.95	11.34	18.78	17.61	16.6	17.08	12.76	17.21	36.41	34.94	29.21	17.24	16.07	18.37	23.48	24.44	15.91	18.5	17.76	16.87	15.47	17.21	14.35	14.78	15.16	27.17	28.65	19.99	20.61	19.4	22.5	19	20.37	14.31	15.85	12.83	11.92	27.02	22.825	15.495	13.145	17.6633
ENSMUSG00000055531.12	Cpsf6	25.42	22.74	23.1	23.71	20.01	15.05	15.13	12.73	22.34	25	20.73	12.09	15.89	14.52	24.81	28.59	26.53	17.7	19.13	19.91	22.81	23.47	16.98	19.69	21.1	23.67	20.01	9.58	15.36	14.57	15.01	26.53	29.59	20.72	21.46	20.62	20.64	18.52	20.13	20.23	18.7	11.71	15.43	24.08	23.405	17.53	13.93	22.69
ENSMUSG00000023908.7	Pkmyt1	11.77	10.23	10.05	14.37	12.49	7.31	4.47	4.12	7.34	6.01	7.72	7.85	8.85	6.35	25.61	19.91	17.49	7.2	6.65	6.26	10.96	13.25	6.87	6.81	7.74	10.48	9.52	3.75	5.32	4.31	4.3	20.67	15.73	8.31	7.61	6.48	8.39	7.15	8.01	1.64	1.79	3.34	3.21	11	12.21	9.9	4.295	7.02333
ENSMUSG00000038644.14	Pold1	17.48	18.63	17.24	15.43	13.73	11.59	9.86	11.13	6.76	7.88	8.59	8.38	8.17	6.22	16.8	14.12	12.54	7.73	8.2	9.58	7.54	7.94	9.89	7.68	12.56	10.5	8.05	7.1	4.45	10.31	9.21	17.69	18.79	12.16	9.9	15.78	11.83	11.01	11.11	23.26	22.04	5.42	4.72	18.055	16.335	12.66	10.495	7.74333
ENSMUSG00000020974.5	Pole2	7.05	6.36	4.52	5.47	4.1	4.29	2.99	3.08	4.03	4.16	4.06	3.65	3.41	3.47	5.33	7.33	6.3	5.13	4.58	4.25	4.94	4.42	3.93	3.77	5.12	5.12	4.76	2.5	3.15	2.51	3.42	8.39	8.19	4.91	5.84	5.35	5.8	4.16	5.42	6.88	7.92	3.03	2.82	6.705	4.995	4.195	3.035	4.08333
ENSMUSG00000079614.3	Seh1l	26.06	22.09	22.23	24.45	23.07	15.98	15.48	16.19	25.43	25.29	23.71	14.15	14.81	15.87	26.16	32.55	25.55	16.63	16.63	16.96	25.14	26.08	20.79	22.71	22.71	20.79	20.12	8.46	16.89	19.31	18.1	28.35	33.18	27.86	27.68	32.11	26.08	25.26	26.4	24.48	22.99	14.12	14.11	24.075	23.34	19.525	15.835	24.81
ENSMUSG00000027208.14	Fgf7	8.33	7.38	5.22	9.27	2.25	2.32	1.81	2.2	1.47	1.32	1.24	2.62	2.22	3.86	10.13	9.34	8.38	2.21	1.54	1.83	1.43	2.59	1.87	1.36	1.35	1.89	1.55	1.38	2.87	2.51	2.46	7.78	7.11	2.39	1.91	2.27	2.51	2.27	1.73	3.48	4.01	1.11	2.17	7.855	7.245	2.285	2.005	1.34333
ENSMUSG00000019929.15	Dcn	422.04	407.52	458.01	505.13	352.06	203.28	308.72	325.06	282	302.61	283.04	928.46	569.29	991.84	1013.52	1010.06	1005.77	315.57	320.78	320.16	605.25	550.45	304.18	295.13	295.6	271.36	285.45	588.54	554.22	342.11	342.03	781.26	825.87	248.55	253.6	287.44	396.77	402.1	409.58	498.1	512.92	225.86	227.57	414.78	481.57	277.67	316.89	289.217
ENSMUSG00000021702.7	Thbs4	1.88	1.75	2.98	2.72	0.86	0.83	1.9	1.32	1.34	1.12	1.46	3.71	1.94	3.23	3.75	3.93	3.92	0.46	0.54	0.68	1.38	0.97	0.86	0.74	0.68	1.09	0.96	0.93	0.8	1.5	1.66	3.5	2.97	0.82	1.21	1.15	1.14	0.85	1.13	1.82	2.35	0.23	0.36	1.815	2.85	0.845	1.61	1.30667
ENSMUSG00000025358.15	Cdk2	20.01	18.95	13.59	20.68	13.13	12.58	8.66	7.11	11.91	13.01	12.09	9.54	8.1	8.95	22.45	22.78	22.04	12.32	12.05	11.66	13.84	17.74	10.38	11.81	13.13	15.26	13.33	4.44	6.58	7.98	8.46	26.34	29.2	16.32	16.14	19.2	16.36	16.06	15.84	17.42	17.83	6.71	6.08	19.48	17.135	12.855	7.885	12.3367
ENSMUSG00000021614.16	Vcan	7.37	6.1	4.38	6.71	2.01	1.57	2.37	1.13	1.85	1.52	1.96	2.44	1.25	2.64	6.67	7.93	7.86	1.89	1.1	1.71	2.63	4	0.76	1.63	1.61	3.64	1.37	1.76	1.76	2.35	1.62	11.87	10.63	1.63	1.18	1.16	1.53	1.25	2.19	4.27	3.75	0.47	1.07	6.735	5.545	1.79	1.75	1.77667
ENSMUSG00000070348.4	Ccnd1	70.48	66.49	57.21	75.24	35.81	37.46	19.21	17.8	18.86	20.3	18.39	17.45	19.36	16.26	65.35	72.57	62.2	13.65	14.23	13.68	23.34	26.17	21.08	22.4	23.62	24.35	25.01	15.19	19.01	17.91	18.17	55.72	54.62	31.53	33.06	31.09	33.14	35.56	33.59	31.99	33.92	11.37	12.43	68.485	66.225	36.635	18.505	19.1833
ENSMUSG00000057236.10	Rbbp4	105.71	100.84	98.1	98.83	62.62	67.62	66.75	65.28	70.74	68.02	65.5	50.5	40.94	56.99	82.32	106.71	114.17	75.48	64.89	66.32	67.23	69.98	61.97	67.63	66.99	79.12	66.87	50.88	42.86	61.88	56.5	84.09	102.84	60.53	71.17	74.62	68.36	63.32	64.97	44.31	40.57	58.16	58.78	103.275	98.465	65.12	66.015	68.0867
ENSMUSG00000028871.7	Rspo1	2.66	3.64	4.5	3.79	2.74	3.12	1.41	1.6	2.31	1.65	1.64	6.77	2.88	3.97	8.24	5.86	6.11	2.08	1.5	2.16	3.89	3.33	2.84	3.37	3.49	2.21	1.85	2.87	2.88	0.79	1.29	6.59	4.87	2.54	1.26	1.84	2	2.66	1.81	3.42	2.21	1.78	1.7	3.15	4.145	2.93	1.505	1.86667
ENSMUSG00000025395.14	Prim1	28.19	25.06	20.91	26.6	15.97	12.5	9.47	10.44	16.72	18.15	15.91	12.04	9.18	9.6	27.79	31.57	26.22	12.1	12.98	13.51	14.92	17.56	16.24	15.33	13.93	17.51	16.85	7.96	8.65	12.3	11.55	39.13	39.71	21.01	19.42	21.24	19.79	21.46	19.89	28.69	28.7	7.18	6.57	26.625	23.755	14.235	9.955	16.9267
ENSMUSG00000026134.11	Prim2	10.89	8.03	9.19	10.8	7.56	6	4.12	4.79	7.26	7.62	8.85	4.94	5.22	4.14	10.6	11	10.46	6.98	7.05	5.98	7.52	9.2	7.13	6.85	6.81	9.02	8.96	3.75	3.63	5.08	4.18	12.2	14.95	10.7	8.96	10.05	8.7	8.77	8.93	12.19	10.43	3.86	3.16	9.46	9.995	6.78	4.455	7.91
ENSMUSG00000028884.14	Rpa2	26.06	23.64	18.25	29.21	21.12	15.29	14.09	16.37	19.95	19.81	20.81	12.25	10.52	13.54	29.93	34.13	28.62	12.1	12.67	14.87	20.19	23.7	15.09	16.54	15.14	19.03	20.3	9.4	8.72	16.08	16.18	34.97	36.56	18.78	22.94	24.03	22.88	22.58	20.36	28.78	28.12	7.39	5.8	24.85	23.73	18.205	15.23	20.19
ENSMUSG00000020393.16	Kremen1	14.7	13.16	15.04	14.36	9.27	10.37	7.5	7	10.26	10.68	10.59	11.11	11.06	12.25	16.29	13.74	12.34	10.94	10.78	10.36	8.47	10.06	11.87	11.83	11.93	10.1	10.52	5.25	10.71	7.63	7.25	15.65	14	10.27	10.81	9.5	11.52	11	11.61	6.93	6	9.46	10.04	13.93	14.7	9.82	7.25	10.51
ENSMUSG00000007815.13	Rhoa	260.22	219.75	203.52	207.73	171.4	172.42	164.5	148.35	154.8	171.98	162.1	171.77	177.14	186.96	189.07	250.8	207.71	187.56	190.33	180.57	155.96	180.25	174.23	178.38	176.95	160.82	164.51	145.82	203.28	163.37	166.14	193.81	211.56	159.19	174.15	159.76	162.01	166.6	163.9	168.84	183.2	159.55	174.71	239.985	205.625	171.91	156.425	162.96
ENSMUSG00000021835.14	Bmp4	28.36	29.28	27.92	29.95	21.78	16.15	25.35	23.6	33.41	30.84	31.37	25.84	22.65	25.49	42.69	29.25	32.12	27.47	27.05	30.1	27.93	27.49	33.61	29.49	31.71	24.83	26.7	30.7	41.68	24.51	25.13	35.8	33.14	27.05	28.2	33.11	29.79	30.54	27.47	21.07	20.34	41.61	40.44	28.82	28.935	18.965	24.475	31.8733
ENSMUSG00000001847.14	Rac1	144.02	143.4	135.86	163.05	136.61	110.22	95.77	104.22	121.18	115.85	116.76	159.31	156.37	152.76	189.87	201.91	193.12	146.44	130.47	135.62	162.35	180.59	120.37	132.17	120.68	117.55	140.81	96.82	161.39	101.21	102.4	171.32	166.41	126.06	132.61	121.36	127.42	131.84	127.96	92.08	101.77	111.05	111.54	143.71	149.455	123.415	99.995	117.93
ENSMUSG00000025231.16	Sufu	4.32	4.84	4.4	4.31	3.3	2.44	3.32	3.17	3.9	4.06	4.1	3.51	2.72	3.05	5.02	4.97	4.73	3.06	3.06	3.38	3.02	3.1	3.38	3.12	4.06	3.9	3.82	2.41	4.05	3.06	3.35	5.82	4.91	4.37	3.78	3.95	3.92	3.87	4.3	3.84	3.73	2.88	2.43	4.58	4.355	2.87	3.245	4.02
ENSMUSG00000034064.14	Poglut1	16.63	16.81	15	13.58	11.03	11.89	8.95	11.63	14.62	13.69	13.87	12.18	10.1	11.44	16.98	16	15.96	9.64	11.05	9.77	10.34	8.69	12.98	11.89	12.22	11.07	12.61	6.75	12.61	12.2	11.54	18.12	19.8	14.47	14.46	13.73	14.72	13.54	13.18	15.96	13.84	9.83	10.6	16.72	14.29	11.46	10.29	14.06
ENSMUSG00000028991.15	Mtor	6.6	6.06	5.64	5.9	5.19	6.12	3.96	3.42	5.44	4.98	5.13	5.68	4.56	6.24	8.31	8.39	7.25	4.75	4.84	5.99	7.03	5.99	5.82	6.25	6.44	5.46	4.58	5.21	5.05	4.23	3.4	8.15	4.77	5.9	4.91	5.51	4.98	5.39	5.43	4.66	4.17	4.49	4.65	6.33	5.77	5.655	3.69	5.18333
ENSMUSG00000063358.15	Mapk1	55.49	48.66	41.69	43.42	38.08	33.52	33.86	34.2	42.19	50.5	51.34	43.42	42.08	40.31	48.9	55.34	43.67	37.18	38.52	33.36	37.81	41.19	48.26	45.4	43.07	39.03	37.35	30.13	40.84	36.06	35.34	60.9	64.17	43.27	45.34	41.53	40.89	42.35	42.12	46.3	50.41	37.02	39.03	52.075	42.555	35.8	34.03	48.01
ENSMUSG00000031353.13	Rbbp7	102.87	86.69	68.92	92.13	82.05	52.7	58.71	47.82	86.94	89.9	80.34	71.93	61.13	62.37	110.34	125.19	103.76	63.43	77.77	69.11	91.5	98.79	68.32	70.26	76.88	75.78	59.07	39.2	54.21	54.34	52.29	126.12	129.51	88.21	95.55	100.67	96.65	83.42	85.06	106	110.76	43.29	44.74	94.78	80.525	67.375	53.265	85.7267
ENSMUSG00000000001.4	Gnai3	55.8	47.69	35.88	40.33	37.5	33.01	26.11	23.24	37.2	39.22	38.32	34.68	38.79	35.45	51.21	63.33	48.97	39.68	44.56	44.44	50.39	48.18	39.07	41.53	41.71	29.74	26.97	15.35	40.12	25.13	25.18	51.77	52.48	41.72	44.8	45.75	39.58	36.85	39.67	36.89	40.32	30.63	33.31	51.745	38.105	35.255	24.675	38.2467
ENSMUSG00000022346.14	Myc	38.88	35.75	29.26	31.62	26.7	20.33	13.54	13.46	23.92	23.49	21.3	40.22	31.7	31.73	47.35	49.52	45.23	22.59	28.46	32.59	23.37	28.29	20.86	22.26	21.86	26.25	18.33	20.08	20.19	14.69	15.75	41.28	39.09	23.74	26.07	24.81	26.58	27.17	27.38	16.37	15.08	20.98	21.13	37.315	30.44	23.515	13.5	22.9033
ENSMUSG00000066979.5	Bub3	70.58	59.46	54.56	63.59	46.38	37.59	43.56	46.07	65.1	61.49	64.35	38.09	39.88	39.21	77.93	70.12	63.66	42.72	45.09	47.07	59.28	61.29	54.65	52.15	52.44	53.88	57.76	41.27	50.36	49.58	48.66	89.34	85.05	60.08	60.3	70.73	65.43	64.14	67.84	73.38	76.82	35.56	36.02	65.02	59.075	41.985	44.815	63.6467
ENSMUSG00000041133.11	Smc1a	38.95	38.24	38.68	41.26	22.91	27.85	25.9	25.26	27.41	31.77	29.64	24.05	23.33	26.12	30.73	33.9	34.19	25.75	25.35	25.55	24.75	20.28	23.38	26.09	25.17	28.09	30.76	20.18	24.93	25.71	26.27	40.16	39.54	24.39	27.44	27.46	27.94	28.49	30.29	39.48	40.11	19.73	22.07	38.595	39.97	25.38	25.58	29.6067
[truncated: 13 more columns]

## Sheet: Activator, Chin+Ventral
Gene_ID	Gene_Name	CCT1	CCT2	CEA1	CEA2	CMA1	CMA2	CLA1	CLA2	CC1	CC2	CC3	CRT1	CRT2	CRT3	VCT1	VCT2	VCT3	VEA1	VEA2	VEA3	VMA1	VMA2	VLA1	VLA2	VLA3	VC1	VC2	VRT2	VRT1	DCT1	DCT2	DEA1	DEA2	DMA1	DMA2	DMA3	DLA1	DLA2	DLA3	DC2	DC1	DRT2	DRT1	mean.CCT	mean.CEA	mean.CMA	mean.CLA	mean.CC
ENSMUSG00000010609.15	Psen2	8.63	10.55	8.96	11.02	10.21	9.43	8.83	8.35	6.63	7.27	6.94	13.9	12	10.86	11.59	15.58	11.7	9.68	9	7.33	8.59	6.98	5.54	8.04	9.11	6.3	6.37	12.97	8.49	9.99	8.4	13.57	8.74	8.74	7.49	10.8	8.22	9.28	9.52	12.92	16.22	6.73	7.43	9.59	9.99	9.82	8.59	6.94667
ENSMUSG00000027087.11	Itgav	79.77	99.21	97.55	107.5	95.16	102.97	67.89	70.33	74.53	60.25	67.03	136.67	109.5	124.86	71.12	109.4	116.06	123.14	120.37	113.29	101.03	102.55	59.84	77.75	90.66	94.63	93.55	58.69	102.36	68.52	74.06	61.98	83.39	72.01	78.46	97.49	73.42	90.71	82.97	73.85	63.01	97.77	95.29	89.49	102.525	99.065	69.11	67.27
ENSMUSG00000034557.14	Zfyve9	5.4	5.89	7.08	5.46	4.12	5.58	3.74	4.1	3.78	3.7	3.4	5.31	5.25	5.86	4.13	5.23	4.87	6.43	5.55	6.31	4.37	4.47	4.03	4.77	4.43	4.97	4.75	4.51	6.59	4.15	4.73	3.9	3.9	3.69	4.31	3.91	3.55	3.8	3.53	5.46	5.38	6.07	6.12	5.645	6.27	4.85	3.92	3.62667
ENSMUSG00000008855.17	Hdac5	47.21	43.34	48.66	42.73	34.41	39.79	33.04	33.36	35.72	32.13	31.08	56.19	51.5	46.96	47.05	45.41	34.21	51.41	54.72	50.87	40.97	33.89	47.1	39.16	44.41	34.19	30.8	55.06	44.93	35.71	38.53	39.54	33.81	39.03	35.33	34.91	42.05	35.27	38.14	42	53.37	48.99	50.23	45.275	45.695	37.1	33.2	32.9767
ENSMUSG00000020964.14	Sel1l	23.31	24.24	31.7	28.61	13.21	29.99	16.19	18.52	13.2	11.64	14.52	16.34	31.32	29.8	21.57	20	22.25	31.62	27.13	24.72	26.01	24.37	20.26	12.24	17.07	20.55	17.86	20.56	12.45	14.75	18.3	19.29	17.51	20.47	18.51	19.77	15.74	18.23	17.58	39.56	45.29	23.07	22.1	23.775	30.155	21.6	17.355	13.12
ENSMUSG00000004266.15	Ptpn6	15.93	19.05	23.09	16.63	13.76	16.75	16.56	13.55	10.26	10.1	9.11	29.02	17.91	28.35	20.28	20.99	21.84	23.52	20.83	20.99	11.27	10.2	11.77	10.38	14.36	12.11	11.38	21.42	17.37	13.58	11.68	19.77	17.34	15.22	14.23	11.97	14.63	14.35	14.81	23.8	27.17	19.42	20.33	17.49	19.86	15.255	15.055	9.82333
ENSMUSG00000028161.17	Ppp3ca	57.44	60.88	64.19	59.73	55.85	68.06	42.85	43.76	44.02	32.32	28.42	83.26	85.95	98.36	48.85	56.47	63.63	102.18	89.09	82.2	72.87	56.84	40.45	44.62	44	38.81	37.34	49.19	92.96	45.27	43.83	43.77	46.79	40.58	43.19	43.85	36.65	41.38	40	48.91	45.59	73.41	68.19	59.16	61.96	61.955	43.305	34.92
ENSMUSG00000022114.4	Spry2	95.88	73.71	74.61	102.02	88.88	59.19	38.5	36.83	33.26	39.82	35.15	75.27	120.05	89.7	106.93	165.64	138.68	83.63	92.18	84.46	88.83	96.69	43.99	47.69	49.31	43.5	42.17	52.56	64.69	41.37	38.19	54.42	71.31	36.79	42.59	65.86	53.85	58.17	65.67	37.27	43.97	57.4	59.99	84.795	88.315	74.035	37.665	36.0767
ENSMUSG00000028988.13	Ctnnbip1	64.15	68.25	77.34	66.63	41.84	50.39	40.13	39.72	40.58	37.5	36.21	60.07	56.14	60.56	87.55	68.91	84.72	72.09	75.78	70.74	57.82	53.74	41.93	36.99	43.93	33.68	45.69	68.7	63.72	43.11	39.54	53.87	49.86	37.05	32.39	45.84	45.39	47.28	48.83	34.04	38.61	56.26	54.97	66.2	71.985	46.115	39.925	38.0967
ENSMUSG00000042644.8	Itpr3	16.53	15.77	15.15	11.68	7.28	14.01	8.99	8.07	7.73	7.17	8.06	17.92	15.6	16.19	9.44	8.79	7.36	19.03	18.61	18.54	5.28	4.51	10.36	10.13	11.16	8.39	7.44	16.65	14.65	8.52	8.5	8.77	7.91	8.52	8.15	8.07	10.36	9.25	9.44	9.02	9.16	17.91	19.58	16.15	13.415	10.645	8.53	7.65333
ENSMUSG00000038780.14	Smurf1	3.36	3.05	3.39	3.84	2.45	4.1	2.39	2.37	2.54	2.33	2.56	3.84	3.66	3.71	2.37	2.58	2.31	3.86	4.47	5.13	2.1	2.44	2.49	2.63	3.03	2.47	2.49	3.16	2.66	2.47	2.11	2.21	2.16	2.15	2.12	2.61	2.8	2.24	2.33	1.55	2.56	3.94	3.98	3.205	3.615	3.275	2.38	2.47667
ENSMUSG00000052707.8	Tnrc6a	17.48	19.23	22.92	22.66	10.79	26.31	9.92	17.52	10.7	12.62	7.8	35.04	25.73	26.17	16.78	15.84	24.31	21.67	22.95	28.01	15.54	8.15	14.22	11.08	10.97	11.8	17.64	26.98	15.35	11.15	18.48	11.29	21.13	9.77	9.59	16.08	10.4	14.87	12.26	21.44	21.08	20.97	13.77	18.355	22.79	18.55	13.72	10.3733
ENSMUSG00000030287.15	Itpr2	4.83	5.36	6.48	5.05	4.5	4.53	2.68	2.42	3.26	3.04	3.3	8.69	6.14	7.86	4.6	4.27	4.89	6.33	6	7.56	3.44	1.58	3.12	3.51	4.02	3.51	4.36	3.93	3.72	3.23	2.78	3.42	4.57	3.94	4.16	2.78	3.06	3.13	2.9	2.81	2.66	4.97	5.04	5.095	5.765	4.515	2.55	3.2
ENSMUSG00000029050.15	Ski	10.69	10.97	11.5	10.78	7.87	9.32	8.33	8.14	7.46	7.41	7.19	10.74	8.91	10.32	10.64	10.48	10.09	11.13	11.94	12.12	7.5	7.13	7.18	8	7.96	9.2	8	7.99	9.7	7.92	7.67	9.13	8.81	6.46	6.66	7.81	8.28	8.27	8.45	9.93	9.01	9.14	9.66	10.83	11.14	8.595	8.235	7.35333
ENSMUSG00000016933.17	Plcg1	9.34	8.88	11.74	9.59	7.79	8.01	7.35	8.94	9.05	8.98	8.9	10.49	9.97	9.24	10.97	8.61	10.33	11.25	11.51	13	6.27	7.34	8.7	8.78	8.35	8.4	8.53	7.24	11.61	7.99	8.53	13.22	11.76	6.62	8.19	8.47	7.48	7.83	8.56	7.77	7.92	10.87	11.37	9.11	10.665	7.9	8.145	8.97667
ENSMUSG00000070509.15	Rgma	5.95	7.58	7.46	6.66	4.44	6.31	3.86	5.25	5.35	3.66	4.59	8.85	5.26	7.86	7.38	6.14	7.53	8.86	7.96	8.46	5.01	4.95	4.74	4.28	5.46	5.08	5.54	4.19	9.93	4.9	5.08	6.73	5.48	5.61	5.38	5.03	5.06	4.42	4.64	2.48	1.92	6.8	5.79	6.765	7.06	5.375	4.555	4.53333
[truncated: 13 more columns]

## Sheet: Inhibitor, Shared
Gene_ID	Gene_Name	CCT1	CCT2	CEA1	CEA2	CMA1	CMA2	CLA1	CLA2	CC1	CC2	CC3	CRT1	CRT2	CRT3	VCT1	VCT2	VCT3	VEA1	VEA2	VEA3	VMA1	VMA2	VLA1	VLA2	VLA3	VC1	VC2	VRT2	VRT1	DCT1	DCT2	DEA1	DEA2	DMA1	DMA2	DMA3	DLA1	DLA2	DLA3	DC2	DC1	DRT2	DRT1	mean.CCT	mean.CEA	mean.CMA	mean.CLA	mean.CC
ENSMUSG00000020327.3	Fgf22	18.68	17.85	28.2	28.07	31.77	26.44	46.11	35.99	41.5	36.03	42.43	20.3	30.8	20.61	29.2	25.03	25.22	20.99	26.55	28.02	73.64	59.97	30.71	29.38	30.04	35.95	36.74	61.94	54.24	36.95	41.26	14.21	15.43	31.49	36.79	32.36	36.05	31.4	33.65	18.68	25.67	43.97	37.37	18.265	28.135	29.105	41.05	39.9867
ENSMUSG00000069744.7	Psmb3	448.84	432.24	406.16	442.62	396.66	377.09	472.18	477.23	506.28	500.97	521.83	351.45	369.02	339.88	530.1	435.88	430.34	364.52	369.32	402.01	413.89	431.31	514.19	479.92	484.17	453.39	559.21	438.41	406.66	478.36	489.91	540.68	477.88	518.67	489.6	524.96	551.85	533.14	551.06	531.83	561.01	353.05	369.5	440.54	424.39	386.875	474.705	509.693
ENSMUSG00000005625.15	Psmd4	215.71	209.74	201.84	210.95	230.82	205.93	224.64	230.89	232.43	235.39	256.99	202.04	189.48	180.17	256.89	233.43	195.19	192.91	183.06	204.99	229.49	238.4	246.48	241.63	226.93	233.89	231.82	221.19	229.83	230.7	231.26	251.07	219.78	225.01	233.75	243.06	261.49	244.34	258.13	273.82	279.48	194.34	194.99	212.725	206.395	218.375	227.765	241.603
ENSMUSG00000030591.16	Psmd8	162.88	171.47	165.97	173.19	200.29	184.49	208.51	179.61	170.11	192.26	174.55	159.85	172.26	158.57	198.08	190.45	188.78	164.35	176.17	183.26	206.12	220.65	186.09	180.72	194.38	194.61	168.83	221.3	154.12	195.82	199.67	146.84	135.7	171.6	170.06	152.36	177.8	169.87	165.05	142.46	142.63	162.62	165.82	167.175	169.58	192.39	194.06	178.973
ENSMUSG00000024563.15	Smad2	14.84	14.72	13.42	12.85	13.99	11.26	14.3	13.36	15.94	17.94	16.21	12.11	11.91	12	14.61	15.41	14.14	13.31	14.49	15.8	15.34	16.03	15.47	17.19	18.31	15.81	13.66	10.24	17.07	13.6	14.06	15.77	15.1	16.49	16.49	17.07	16.75	14.43	16.45	16.82	18.13	15.57	17.08	14.78	13.135	12.625	13.83	16.6967
ENSMUSG00000028698.13	Pik3r3	4.26	4.22	3.94	5.45	5.54	5.13	11.11	12.89	12.6	12.77	12.15	3.03	4.05	3.58	5.13	4.99	4.73	3.54	5.68	4.58	9.33	9.05	8.61	9.84	8.82	9.3	9.59	3.44	9.62	14.48	12.11	6.2	6.32	8.38	9.19	9.95	6.9	7.36	7.96	7.89	8.97	6.65	6.25	4.24	4.695	5.335	12	12.5067
ENSMUSG00000044365.15	Cxxc4	1.06	1	0.85	0.94	1.12	1.1	1.02	1.1	2.07	1.33	1.07	0.16	0.41	0.43	0.56	1.08	1.02	0.61	0.44	0.76	1.1	0.6	0.96	0.95	0.87	1.34	1.16	0.38	0.77	1.28	1.23	0.7	1.01	0.95	1.1	1.33	1.19	0.98	0.94	1.43	1.15	0.54	0.56	1.03	0.895	1.11	1.06	1.49
ENSMUSG00000004788.11	Eif2b2	75.68	54.16	56.48	68.84	86.34	67.24	81.04	85.93	89.93	90.65	94.94	51.81	50.28	47.73	86.36	72.52	60.06	41.2	41.78	41.22	72.45	80.63	87.93	77.84	84.6	89.3	101.47	62.79	53.76	71.93	70.76	66.15	55.3	95.81	109.94	80.89	103.23	84.76	80.55	81.97	85.18	58.02	54.34	64.92	62.66	76.79	83.485	91.84
ENSMUSG00000029145.12	Eif2b4	72.36	65.9	83.67	85.64	122.55	105.77	116.77	127.74	108.96	104.48	119.64	51.6	49.64	38.57	77.69	63.61	56	49.63	48.96	48.01	86.38	100.16	123.88	109.46	106.01	114.21	119.4	94.06	87.36	122.38	129.24	59.18	58.88	112.23	118.88	109.84	110.56	119.5	122.66	117.63	127.84	94.13	97.07	69.13	84.655	114.16	122.255	111.027
ENSMUSG00000038400.15	Pmepa1	8.92	8.75	10.23	12.06	20.07	20.19	23.61	23.9	14.25	15.96	15.87	11.72	13.92	13.5	11.44	14.9	10.56	9.25	10.24	9.43	16.16	16.22	17.67	16.98	19.34	18.62	20.64	13.33	14.45	23.83	24.05	7.06	7.75	14.36	13.07	17.19	15.97	15.72	15.81	16.85	18.72	16.18	15.73	8.835	11.145	20.13	23.755	15.36
ENSMUSG00000021178.8	Psmc1	153.82	153.44	144.87	159.25	171.42	144.74	184.98	186.58	213.28	218.54	209.29	135.12	121.09	125.27	181.81	182.82	175.28	126.78	140.06	141.64	170.29	187.96	182.13	186.3	190.14	187.57	180.15	139.22	167.5	206.55	200.49	180.97	184.98	192.62	194.64	252.37	222.81	220.99	231.25	183.41	189.7	150.82	143.31	153.63	152.06	158.08	185.78	213.703
ENSMUSG00000020708.12	Psmc5	267.01	251.77	244.2	254.61	210.85	205.17	276.9	270.21	295.97	318.72	283.05	184.6	190	186.15	249.4	237.17	231.66	192.9	202.96	210.74	213.51	209.35	268.14	258.66	260.48	258.91	266.07	234.5	249.83	284.29	289.78	268.58	247.91	265.19	270.36	307.59	318.36	294.78	306.07	296.45	305.04	219.39	226.61	259.39	249.405	208.01	273.555	299.247
ENSMUSG00000020720.13	Psmd12	80.65	83.82	70	85.52	89.55	71.13	72.24	74.97	108.59	110.16	99.9	69.27	68.22	67.92	90.04	97.96	88.18	72.63	75.11	81.11	105.98	106.03	97.73	94.85	98.13	98.9	83.22	67.88	73	83.88	85.75	93.47	98.2	98.97	104.9	121.78	99.98	95.6	105.36	138.83	154.09	64.46	65.49	82.235	77.76	80.34	73.605	106.217
ENSMUSG00000036858.8	Ptcra	2.45	4.82	4.93	7.05	7.98	15.54	18.77	27.5	22.02	13.78	16.98	2.68	3.9	2.61	2.36	2.06	3.27	2.54	2.48	1.85	3.5	3.1	13.25	11.15	13.02	17.7	28.12	9.01	4.38	22.4	22.94	3.4	3.31	18.01	16.96	20.08	18.32	19.77	19.13	41.2	34.77	9.85	4.88	3.635	5.99	11.76	23.135	17.5933
ENSMUSG00000048776.8	Pthlh	10.76	11.07	12.32	10.73	24.21	25.46	18.26	18.89	36.34	35.56	31.71	14.67	18.93	14.19	9.93	12.39	9.51	14.37	12.55	14.65	13.85	16.02	40.29	43.02	44.51	42.17	41.97	12.91	17.5	21.26	21.55	7.42	10.89	49.55	53.23	60.38	47.95	51.66	51.82	20.18	22.91	11.96	11.95	10.915	11.525	24.835	18.575	34.5367
ENSMUSG00000044813.15	Shb	17.52	18.39	19.57	16.58	15.45	21.71	26.45	26.31	23.34	20.78	26.3	10.65	11.77	10.07	9.22	12.84	8.05	11.7	12.36	14.66	12.6	10.4	29.99	28.74	31.75	29.84	26.37	30.09	34.78	23.22	23.01	7.84	5.78	23.33	25.81	25.96	23.75	23.86	20.79	26.07	29.13	36.16	34.87	17.955	18.075	18.58	26.38	23.4733
ENSMUSG00000018189.12	Uchl5	183.24	226.91	266.32	247.85	330.78	444.22	427.41	684.43	557.72	406.63	455.91	125.88	223.58	147.82	190.68	146.28	194.36	168.18	129.26	182.26	320.8	227.87	403.17	350.89	380.02	515.81	716.37	275.44	138.1	605.35	582.97	191.15	187.82	514.36	512.57	552.65	507.25	498.14	485.66	1024.41	840.15	305.89	174.49	205.075	257.085	387.5	555.92	473.42
ENSMUSG00000037815.6	Ctnna1	70.26	63.69	66.54	61.34	77.66	72.74	71.98	74.03	88.78	87.86	87.52	61.95	60.09	61.43	62.42	68.19	57.73	73.45	73.32	76.31	82.78	80.83	95.58	95.41	88.61	90.1	88.22	46.4	84.01	77.31	78.8	70.16	68.68	90.3	93.8	103.96	97.66	92.31	98.85	121.83	125.52	70.39	70.01	66.975	63.94	75.2	73.005	88.0533
ENSMUSG00000019843.14	Fyn	8.29	9.12	9.62	10.28	14.92	15.18	14.03	12.41	11.13	9.31	11.42	9.11	7.18	9.47	7.5	6.3	9.69	9.32	9.08	9.91	11.28	8.54	12.42	12.62	11.56	14.78	16.96	11.9	12.3	13.14	12.82	6.37	9.73	10.73	10.45	11.01	12.13	11.23	13.8	20.05	19.63	13.09	15.08	8.705	9.95	15.05	13.22	10.62
ENSMUSG00000028683.14	Eif2b3	40.17	42.22	42.65	53.82	56.89	43.51	53.36	59.9	64.27	69.65	65.04	21.1	21.26	19.43	42.57	39.25	43.72	17.29	18.89	18.29	62.75	61.28	60.73	62.86	63.68	56.94	67.12	29.22	36.1	57.49	58.39	38.98	43.08	69.72	70.06	87.35	67.87	71.67	75.48	86.9	80.89	37.32	36.48	41.195	48.235	50.2	56.63	66.32
ENSMUSG00000006678.6	Pola1	8.8	11.25	15.98	14.82	26.67	28.82	25.85	41.53	38.49	21.76	27.63	5.23	15.5	5.54	8.2	6.88	11.32	5.93	5.22	8.73	18.97	14.21	24.31	21.97	23.97	34.8	48.73	13.79	6.56	35.24	34.99	9.56	13.03	37.65	27.35	25.76	25.92	30.4	26.82	61.2	50.92	15.77	9.32	10.025	15.4	27.745	33.69	29.2933
ENSMUSG00000024833.14	Pola2	12.47	14.19	14.38	19.26	16.84	18.31	24.56	33.04	24.58	22.94	21.05	8.84	11.26	7.98	18.36	17	21.38	8.12	7.09	10.28	18.94	15.16	21.17	16.84	19.88	31.17	28.74	7.72	5.81	32.06	29.65	17.99	17.71	23.94	23.93	22.74	21.65	24.27	23.02	42.91	28.7	11.75	7.3	13.33	16.82	17.575	28.8	22.8567
ENSMUSG00000002057.4	Foxn1	15.9	16.4	20.35	21.27	36.34	27.4	35.53	34.37	33.68	33.73	33.71	10.16	13.64	8.44	15.3	12.62	12.81	10.55	10.06	10.51	29.44	30.98	35.11	35.35	37.49	40.58	37.57	18.73	23.3	33.67	34.64	11.74	9.17	36.55	34.58	29.93	33.34	32.95	31.9	10.72	11.82	26.49	28.53	16.15	20.81	31.87	34.95	33.7067
ENSMUSG00000047281.3	Sfn	1320.68	1272.08	1203.71	1280.6	1466.37	1267.18	1883.3	1977.87	2378.75	1971.42	2052.95	851.28	905.19	792.26	1269.6	1091.85	961.54	1255.96	1151.55	1243.67	1814.61	1699.01	2036.28	2013.62	2169.89	2211.51	2164.64	1135.46	2127.51	1990.87	1965.26	1101.28	1022.31	1878.67	1886.33	1889.32	1997.98	1955.44	1984.83	350.71	366.72	1556.79	1530.02	1296.38	1242.15	1366.78	1930.59	2134.37
ENSMUSG00000020733.3	Slc9a3r1	42.49	37.45	41.05	39.91	55.07	56.99	56	52.33	45.28	50.91	50.82	34.3	42.06	32.2	38.18	38.61	34.52	37.13	41.31	40.55	47.79	52.06	62.78	62.05	58.2	63.47	59.76	59.86	50.15	51.82	52.82	28.66	27.02	55.02	54.72	51.57	57.71	54.97	56.78	44.79	51.92	48.32	52.75	39.97	40.48	56.03	54.165	49.0033
ENSMUSG00000026202.13	Tuba4a	277.32	270.31	299.98	250.95	219.96	246.76	323.54	288.65	289.85	368.33	357.38	260.56	248.51	242.4	172.05	154.91	149.29	224.96	219.84	210.98	135.48	150.66	353.7	311.34	302.08	275.36	304.05	424.68	330.13	299.49	282.38	226.18	194.34	268.7	266.66	203.79	287.27	276.05	268.18	208.66	219.84	373.17	390.02	273.815	275.465	233.36	306.095	338.52
ENSMUSG00000036672.4	Cenpt	9.3	8.79	8.91	10.49	10.95	9.13	12.22	14.35	14.23	14.63	13.39	7.26	4.76	5.93	9.69	11.77	9.87	8.27	6.72	7.56	13.11	11.78	12.64	13.4	13.13	15.31	15.62	5.56	7.26	14.69	14.63	12.31	11.93	13.35	12.52	16.91	12.83	16.48	14.82	5.9	5.32	6.75	6.24	9.045	9.7	10.04	13.285	14.0833
ENSMUSG00000022433.18	Csnk1e	62.43	60.18	69.92	69.47	142.6	111.36	128.55	132.51	140.56	124.35	129.19	66.41	76.6	58.67	87.69	63.98	71.57	55.85	64.96	59.67	148.49	140.99	108.67	113.45	125.55	143.75	118.59	116.57	113.32	133.2	123.67	54.19	53.92	96.3	102.77	92.66	110.95	90.78	97.25	67.28	58.06	87.8	91.65	61.305	69.695	126.98	130.53	131.367
ENSMUSG00000029337.2	Fgf5	1	1.1	0.78	1.88	6.37	2.42	10.49	8.69	9.84	10.21	9.15	1.15	2.86	1.13	1.42	1.93	1.71	0.57	0.57	0.8	11.14	10.86	5.24	5.85	4.84	8.54	8.1	1.6	1.72	10.43	8.85	1.39	1.32	5.85	5.56	5.38	4.32	5.54	4.8	4.51	4.43	2.77	2.07	1.05	1.33	4.395	9.59	9.73333
ENSMUSG00000045005.9	Fzd5	3.4	3.36	3.63	3.61	3.56	4.71	4.76	5.08	4.79	4.67	4.73	2.21	2.72	2.28	2.61	3.37	2.34	2.94	2.89	2.63	2.64	3.62	4.57	4.57	4.62	4.78	5.19	2.18	5.16	5.05	5.64	2.95	2.5	4.21	3.75	4.12	4.29	4.46	3.61	6.22	6.8	6.24	6.21	3.38	3.62	4.135	4.92	4.73
ENSMUSG00000028751.13	Pla2g2e	26.47	22.13	40.13	33.32	155.49	126.84	232.56	225.55	150.52	175.01	164.53	40.22	52.74	36.36	31.22	26.96	27.06	42.94	41.73	44.58	133.49	139.68	173.35	161.63	156.97	175	188.32	102.79	111.82	236.96	234.78	16.54	17.73	117.86	118.74	102.64	127.71	125.52	130.24	34.91	35	102.22	100.63	24.3	36.725	141.165	229.055	163.353
ENSMUSG00000098488.7	Pla2g4b	2.23	1.24	4.47	1.64	7.86	5.56	5.04	6.11	4.6	7.05	6.82	2.09	2.89	0.15	2.09	2.44	1.43	0.89	0.84	0.11	3.37	4.83	8.89	7.04	6.67	6.49	6.31	2.95	5.26	5.96	7.88	1.9	0.28	7.23	8.96	5.93	7.12	3.28	4.48	8.82	8.78	5.95	5.98	1.735	3.055	6.71	5.575	6.15667
ENSMUSG00000032058.14	Ppp2r1b	33.89	32.55	36.51	41.52	48.44	32.14	51.81	56.82	80.5	75.87	72.67	23.8	24.98	22.3	37.38	39.15	33.64	22.51	25.18	24.81	62.56	62.98	59.09	65.38	66.79	54.27	52.6	14.74	57.58	60.73	56.93	36.14	37.66	61.6	63.95	79	57.56	58.51	59.85	49.1	51.66	43.74	43.25	33.22	39.015	40.29	54.315	76.3467
ENSMUSG00000027566.14	Psma7	519.53	508.45	463.14	532.55	597.23	491.11	585.51	610.09	674.46	609.52	613.88	464.55	415.25	425.28	619.68	522.72	535.13	481.67	492.03	521.49	652.5	626.83	585.41	595.4	625.74	654.52	643.33	567.85	659.05	600.56	608.53	509.83	489.92	655.26	625.68	681.65	694.58	656.03	669.51	746.53	803.35	419.32	428.81	513.99	497.845	544.17	597.8	632.62
ENSMUSG00000002102.15	Psmc3	184.54	171.21	170.16	182.68	169.76	155.12	187.88	198.07	228.39	217.94	217.96	171.14	159.19	164.95	225.62	202.38	204.29	174.7	170	191.66	204.1	222.3	208.67	206.16	204.68	197.92	204.08	178.39	193.32	201.43	193.55	213.57	190.06	216.84	225.53	259.72	245.64	233.44	233.22	274.91	299.12	159.92	154.45	177.875	176.42	162.44	192.975	221.43
ENSMUSG00000017428.16	Psmd11	145.34	147.34	134.94	150.45	152.34	124.04	153.19	149.13	213.63	203.69	185.84	128.81	121.26	136.13	166.98	174.23	164.51	141.99	139.43	151.96	199.5	179.47	165.41	174.49	184.36	169.35	181.6	136.29	161.92	153.9	163.74	169.01	169.81	182.61	177.32	240.96	199.31	199.29	206.81	210.94	215.63	145.02	133.2	146.34	142.695	138.19	151.16	201.053
[truncated: 13 more columns]

## Sheet: Inhibitor, Chin
Gene_ID	Gene_Name	CCT1	CCT2	CEA1	CEA2	CMA1	CMA2	CLA1	CLA2	CC1	CC2	CC3	CRT1	CRT2	CRT3	VCT1	VCT2	VCT3	VEA1	VEA2	VEA3	VMA1	VMA2	VLA1	VLA2	VLA3	VC1	VC2	VRT2	VRT1	DCT1	DCT2	DEA1	DEA2	DMA1	DMA2	DMA3	DLA1	DLA2	DLA3	DC2	DC1	DRT2	DRT1	mean.CCT	mean.CEA	mean.CMA	mean.CLA	mean.CC
ENSMUSG00000000126.11	Wnt9a	1.15	0.89	0.96	0.89	1.59	1.65	1.57	1.75	1.7	1.7	1.68	2.36	1.87	1.78	2.09	1.95	1.09	1.53	2.11	1.6	2.02	2.54	1.42	2.04	1.47	1.56	1.64	0.68	3.02	2.06	1.44	1.52	1.29	1.01	1.52	1.73	1.55	1.67	1.17	0.56	0.21	2.1	1.93	1.02	0.925	1.62	1.66	1.69333
ENSMUSG00000041324.13	Inhba	5.06	3.75	5.06	4.93	6.03	4.4	11.41	12.89	12.28	13.48	12.49	4.95	4	4.81	5.1	6.5	4.8	10.15	9.56	10.05	8.11	6.67	9.01	9.63	9.4	7.54	10.61	8.86	11.37	11.61	11.23	8.52	7.33	4.88	5.01	3.59	5.24	5.38	5.95	4.26	4.91	8.66	7.1	4.405	4.995	5.215	12.15	12.75
ENSMUSG00000029167.13	Ppargc1a	1.14	0.93	0.86	0.75	0.84	0.96	1.47	1.64	2.48	2.06	2.22	2.42	1.29	2.47	0.78	0.75	1.02	1.32	1.56	2	1.37	1.54	1.37	1.1	1.4	1.59	1.36	0.68	1.16	1.78	1.76	1.97	1.5	1.44	1.2	1.48	1.52	1.99	1.7	1.58	1.6	1.48	1.29	1.035	0.805	0.9	1.555	2.25333
ENSMUSG00000057522.15	Spop	65.45	64.47	62.01	70.18	77.39	61.12	75	70.05	102.67	97.34	100.73	89.08	76.32	74.69	72.28	76.3	78.18	66.5	76.65	86.76	86.35	84.22	74.21	83.96	75.45	62.94	62.97	37.27	114.07	73.23	75.44	87.55	86.45	76.44	82.37	96.06	82.85	85.74	93.5	63.24	65.65	68.92	66.66	64.96	66.095	69.255	72.525	100.247
ENSMUSG00000021319.6	Sfrp4	0.46	0.68	0.52	2.31	2.6	1.22	5.62	5.17	4.12	3.15	3.95	8.76	9.83	8.93	12.24	16.99	9.58	8.79	7.14	9.63	15.15	15.86	1.19	1.79	2.13	7.02	4.98	5.04	5.02	6.4	6.27	9.49	7.25	10.17	8.98	6.42	2.34	3.73	4.36	5.38	6.15	0.14	0.31	0.57	1.415	1.91	5.395	3.74
ENSMUSG00000090231.10	Cfb	3.68	4.28	2.91	2.94	4.61	2.55	14.31	16.6	8.72	8.08	7.3	21.56	15.41	20.95	13.44	9.99	12.34	5.26	5.57	3.79	6.74	6.7	4.27	4.78	4.28	7.43	6.07	13.2	19.78	14.29	14.02	8.21	8.27	6.12	4.56	5.15	6.19	6.38	6.37	9.41	10.75	3.66	3.45	3.98	2.925	3.58	15.455	8.03333
ENSMUSG00000036585.15	Fgf1	1.41	1.61	1.46	1.62	1.13	1.3	1.93	2.56	2.37	2.66	1.84	2.71	2.61	4.4	2.44	1.22	1.02	2.8	2.68	1.52	1.39	1.2	1.75	1.45	1.92	3.73	1.81	1.69	3.8	2.25	1.82	2.96	1.75	4.13	1.64	1.66	1.62	1.41	1.33	2.01	1.79	2.56	4.58	1.51	1.54	1.215	2.245	2.29
ENSMUSG00000040152.8	Thbs1	11.46	8.94	9.46	7.77	7.04	11.64	19.61	17.39	12.32	15.75	13.8	28.71	27.94	32.09	4.72	6.42	5.2	34.29	35.87	29.93	8.11	6.35	10.98	11.5	11.01	7.07	6.63	25.8	49.4	19.5	20.37	7.09	7.56	4.09	4.38	5.74	6.47	6.08	6.82	6.76	7.29	50.11	50.13	10.2	8.615	9.34	18.5	13.9567
ENSMUSG00000019997.11	Ctgf	12.48	9.79	10.67	9.97	8.92	8.13	13.38	11.94	9.27	11.31	11.01	47.54	63.96	49.86	14.65	18.61	13.65	22.89	25.89	25.01	3.37	6.02	11.58	11.39	7.73	8.78	6.96	6.15	11.65	12.42	12.76	12.25	11.68	9.3	10.58	7.86	9.95	10.02	10.82	5.29	5.88	18.16	20.61	11.135	10.32	8.525	12.66	10.53
[truncated: 13 more columns]

[truncated: 6 more sheets: Inhibitor, Ventral, Inhibitor, Dorsal, Inhibitor, Ventral+Dorsal, Inhibitor, Chin+Dorsal, Inhibitor, Chin+Ventral, Mixed]
