# Supplementary material for: A multi-scale model for hair follicles reveals heterogeneous domains driving rapid spatiotemporal hair growth patterning
Source: eLife. 2017 Jul 11;6:e22772. doi: 10.7554/eLife.22772 (PMC5610035; doi:10.7554/eLife.22772)
Supplement: Supplementary file 3. — DOI: http://dx.doi.org/10.7554/eLife.22772.012 [file elife-22772-supp3.xlsx]

## Sheet: Dorsal, telogen
Gene ID	Gene name	Cartilage/muscle 1	Cartilage/muscle 2	Cartilage/muscle 3	Ear, telogen, 1	Ear telogen, 2	Dorsal, telogen 1	Dorsal telogen 2
ENSMUSG00000027800.14	Tm4sf1	137.03	138.72	136.85	82.84	91.32	1037.88	1043.98
ENSMUSG00000018648.15	Dusp14	21.99	24.79	20.9	98.54	84.05	533.05	539.87
ENSMUSG00000063767.3	S100a7a	4.2	3.14	4.82	2.78	1.78	329.03	326.2
ENSMUSG00000107336.1	Gm43461	54.61	33.97	45.21	29.83	43.25	306.08	321.74
ENSMUSG00000104413.1	Gm37065	26.1	17.48	28.76	10.74	21.12	304.28	317.54
ENSMUSG00000066975.12	Cryba4	0.93	1.38	1.2	1.62	1.18	299.63	285.82
ENSMUSG00000097839.1	Gm26909	14.99	7.55	10.74	16.09	24.22	238.2	241.8
ENSMUSG00000069805.10	Fbp1	0.58	1.49	0.41	1.44	1.7	227.06	239.3
ENSMUSG00000027313.3	Chac1	3.31	3.75	2.83	4.18	3.58	220.57	221.76
ENSMUSG00000020183.11	Cpm	15.04	15.77	15.43	25.01	24.4	222.15	219.19
ENSMUSG00000039682.12	Lap3	21.65	30.19	27.91	40.9	40.25	210.71	211.64
ENSMUSG00000108483.1	RP23-4H17.3	16.1	13.61	15.26	3.69	14.72	192.85	222.46
ENSMUSG00000023232.17	Serinc2	20.82	26.29	20.75	21.73	18.64	206.48	201.8
ENSMUSG00000076441.9	Ass1	21.75	28.92	24.27	25.27	24.06	178.97	182.55
ENSMUSG00000038352.15	Arl5c	6.92	5.66	6.27	12.23	14.42	178.42	182.62
ENSMUSG00000034837.12	Gnat1	14.43	10.52	8.18	11.18	15.05	158.88	177.94
ENSMUSG00000038580.12	Sct	0.27	0	0.63	0.72	0.2	170.32	161.93
ENSMUSG00000087299.1	Gm12953	8.31	9.36	8.91	15.8	23.24	141.89	153.07
ENSMUSG00000099969.1	Gm28960	0	0	53.81	27.59	25.44	93.76	189.9
ENSMUSG00000025993.10	Slc40a1	4.09	4.83	4.05	19.03	22.13	137.07	135.51
ENSMUSG00000025328.9	Padi3	0.06	0.05	0.13	0.35	0.3	118.08	117.5
ENSMUSG00000004552.16	Ctse	0.38	0.35	0.42	1.5	1.23	104.76	107.94
ENSMUSG00000026608.12	Kctd3	18.85	15.55	16.51	19.61	17.98	91.31	100.95
ENSMUSG00000073842.10	Mup7	0.19	0.36	0	0.23	0.5	91.76	94.91
ENSMUSG00000028633.7	Ctps	5.5	5.36	4.92	10.3	10.5	93.04	93.55
ENSMUSG00000047945.6	Marcksl1	10.38	12.13	10.9	18.09	16.21	88.03	88.1
ENSMUSG00000020407.13	Upp1	1.74	1.68	1.84	2.98	2.53	82.36	83.89
ENSMUSG00000048416.15	Mlf1	11.61	14.71	15.46	4.42	5.94	81.94	80.61
ENSMUSG00000097163.2	BC051077	9.46	5.35	7.24	6.49	9.78	81.31	78.85
ENSMUSG00000018362.14	Kpna2	1.72	3.81	3	11.37	11.86	75.56	73.18
ENSMUSG00000104022.1	Gm37214	11.29	9.21	10.62	11.6	12.11	67.84	78.67
ENSMUSG00000107050.1	C030017G13Rik	4.9	2.51	5.46	10.31	12.02	68.82	76.21
ENSMUSG00000073406.10	H2-Bl	3.3	3.5	4.38	8.45	8.25	63.33	74.9
ENSMUSG00000107331.1	Gm42732	7.94	6.13	6.45	8.79	10.73	70.32	66.98
ENSMUSG00000027368.6	Dusp2	2.73	3.45	1.98	1.3	0.9	65.94	67.32
ENSMUSG00000061411.12	Nol4l	14.82	7.68	11.81	1.77	1.95	61.72	61.22
ENSMUSG00000100280.2	Gm28417	13.11	7.37	13.49	6.06	8.6	59.07	62.45
ENSMUSG00000022658.10	Tagln3	0.08	0.42	0.09	0.46	0.46	58.71	58.45
ENSMUSG00000053897.15	Slc39a8	6.93	6.2	6.24	1.36	1.55	54.09	53.36
ENSMUSG00000004988.9	Fxyd4	7.04	9.12	7.14	5.16	4.94	52.9	54.5
ENSMUSG00000028862.6	Map3k6	9.32	12.26	9.48	7.98	8.48	52.09	52.53
ENSMUSG00000090812.8	Samd15	5.49	4.08	8.08	4.02	7.06	50.94	46.65
ENSMUSG00000042109.7	Csdc2	6.06	7.65	6.52	0.85	0.56	45.42	47.69
ENSMUSG00000097055.1	Gm4419	6.57	3.74	5.01	4.03	4.45	43.11	49.24
ENSMUSG00000029171.12	Pgm1	3.07	3.89	2.98	7.31	8.06	46.23	44.95
ENSMUSG00000029134.14	Plb1	1.71	4.05	1.05	3.46	2.27	42.56	43.73
ENSMUSG00000022438.6	Parvb	7.75	6.99	6.06	3.49	3.48	35.72	49.95
ENSMUSG00000027611.12	Procr	4.65	3.85	6.04	8.3	8.44	43.3	41.36
ENSMUSG00000020891.11	Alox8	0.98	0.49	0.79	1.01	0.99	42.13	41.18
ENSMUSG00000029333.14	Rasgef1b	6.28	6.3	7.76	6.38	6.44	38.67	40.76
ENSMUSG00000006345.10	Ggt1	1.32	0.78	1.48	0.39	0.4	35.83	43.58
ENSMUSG00000021831.8	Ero1l	3.52	4.4	3.45	7.05	7.67	40.19	39.1
ENSMUSG00000022180.6	Slc7a8	0.44	0.97	0.32	1.68	1.16	38.96	37.8
ENSMUSG00000015134.14	Aldh1a3	3.1	0.97	1.75	4.37	4.62	37.2	35.29
ENSMUSG00000062382.7	Gm10116	1.15	1.29	1.11	1.2	0.58	35.39	36.13
ENSMUSG00000064841.1	Gm26205	2.52	3.65	0	11.73	0	40.35	28.22
ENSMUSG00000020589.16	Fam49a	1.64	1.36	1.77	3.47	3.15	34.72	33.56
ENSMUSG00000025479.8	Cyp2e1	3.22	4.48	4.17	5.7	6.5	32.03	29.24
ENSMUSG00000079434.8	Neu2	4.97	4.35	4.18	4.81	3.55	28.55	29.01
ENSMUSG00000104720.1	Gm43138	5.67	2.81	6.59	4.59	5.44	26.45	29.39
ENSMUSG00000029999.14	Tgfa	2.94	2.97	2.86	5.87	5.06	26.97	28
ENSMUSG00000036923.12	Stox1	0.2	0.13	0.29	0.25	0.13	27.72	27.21
ENSMUSG00000079173.11	Zan	1.89	1.35	1.78	2.71	2.61	27.29	27.49
ENSMUSG00000025329.3	Padi1	0.06	0.16	0.09	0.2	0.33	25.67	26.84
ENSMUSG00000034248.7	Slc25a37	2	1.88	2.45	3.58	3.77	25.82	26.42
ENSMUSG00000040026.7	Saa3	0	0.95	0.56	0.95	1.42	23.88	27.53
ENSMUSG00000057359.7	Gm17494	2.85	1.61	2.75	2.82	3.09	24.77	25.98
ENSMUSG00000072849.10	Serpina1e	0.72	1.51	0.8	0.47	0.2	24.3	26.32
ENSMUSG00000036306.11	Lzts1	2.12	2.32	2.54	4.53	4.74	24.89	23.58
ENSMUSG00000046733.7	Gprc5a	1	1.15	0.91	0.18	0.23	24.25	23.67
ENSMUSG00000025986.6	Slc39a10	2.94	2.83	2.44	4.28	4.43	24.7	22.45
ENSMUSG00000036858.8	Ptcra	1.18	0.89	0.49	0.91	0.68	22.4	22.94
ENSMUSG00000023043.6	Krt18	2.66	2.68	2.2	0.2	0.05	21.92	22.6
ENSMUSG00000087371.1	Gm15541	2.72	1.91	2.42	2.7	3.64	20.69	20.87
ENSMUSG00000028179.12	Cth	1.32	0.9	2.21	1.46	1.28	20.15	19.8
ENSMUSG00000048706.3	Lurap1l	2.21	2.26	2.45	2.5	2.4	19.92	19.18
ENSMUSG00000010760.4	Phlda2	0.73	1.35	1.51	1.35	0.86	19.73	19.22
ENSMUSG00000028177.13	1810013D15Rik	2.01	1.27	3.11	1.7	2.1	20.27	17.65
ENSMUSG00000103273.1	Gm37913	3.36	1.43	2.4	1.08	1.58	16.68	18.98
ENSMUSG00000026241.5	Nppc	0.77	0	0.56	0.48	0.79	19.72	15.84
ENSMUSG00000097384.1	Gm26815	1.08	1.24	1.42	1.4	1.5	16.17	17.98
ENSMUSG00000003070.6	Efna2	1.74	1.35	1.37	2.75	2.83	16.2	16.21
ENSMUSG00000060487.5	Samd5	0.36	0.57	0.45	0.88	1.03	13.4	15.23
ENSMUSG00000028698.13	Pik3r3	2.32	1.79	1.8	1.94	1.69	14.48	12.11
ENSMUSG00000030108.14	Slc6a13	1.21	1.36	1.16	1.01	1	11.52	13.89
ENSMUSG00000025931.15	Paqr8	0.24	0.54	0.35	1.09	1.25	12.07	12.83
ENSMUSG00000017861.11	Mybl2	1.4	1.18	2.15	2.58	1.38	11.09	13.6
ENSMUSG00000086127.1	Gm11934	1.07	0.61	0.77	0.23	0.36	12.78	11.61
ENSMUSG00000056978.7	Hamp2	2.81	0	0.82	0.64	0.52	12.6	11.12
ENSMUSG00000031610.3	Scrg1	0.81	1.82	0.93	0.76	0.48	9.75	12
ENSMUSG00000034295.9	Fhod3	0.41	0.47	0.46	0.41	0.36	10.44	10.73
ENSMUSG00000097372.1	Gm26876	1.29	1.55	1.53	1.13	1.55	9.37	11.49
ENSMUSG00000054304.3	D130007C19Rik	2.01	1.28	1.19	1.23	1.99	9.84	9.82
ENSMUSG00000018727.19	Cpsf4l	0.77	0.67	0.82	1.06	1.39	9.81	9.49
ENSMUSG00000029337.2	Fgf5	0.4	0.44	0.68	0.03	0.14	10.43	8.85
ENSMUSG00000043282.3	Teddm1b	2.08	0.94	1.53	0.54	0.9	8.76	10.37
ENSMUSG00000043036.13	Ccdc63	1.34	0.99	1.83	1.46	1.94	10.32	8.3
ENSMUSG00000102633.1	Gm38224	1.99	1.4	1.62	1.05	1.65	9.14	9.47
ENSMUSG00000030494.13	Rhpn2	1.26	0.81	0.77	0.58	0.82	9.38	8.47
ENSMUSG00000048582.6	Gja3	1.03	1.19	1.19	0.3	0.27	8.62	8.91
ENSMUSG00000085307.1	Gm11525	0.68	0.59	0.75	1.04	1.46	7.97	9.09
ENSMUSG00000097224.1	Gm26716	0	0	4.47	0	1.38	8.22	8.23
ENSMUSG00000032744.4	Heyl	0.91	1.19	0.61	1.05	1.08	7.77	8.19
ENSMUSG00000029378.5	Areg	0.24	0.43	0.28	1.14	0.83	7.67	7.87
ENSMUSG00000027528.12	Fabp9	0	0	0.8	0.09	0.51	8.35	7.14
ENSMUSG00000098055.1	Gm26947	1.87	0.83	1.5	0.68	0.92	7.7	7.19
ENSMUSG00000108802.1	RP23-64D23.5	1.24	1.36	1.14	0.69	1.2	7.24	7.3
ENSMUSG00000037169.14	Mycn	0.18	0.31	0.29	1.27	0.89	7.69	6.3
ENSMUSG00000038236.8	Hoxa7	0.36	0.4	0.42	0.08	0	7.61	6.17
ENSMUSG00000047977.3	Synb	0.66	0.33	0.52	0.43	0.62	6.53	6.95
ENSMUSG00000091993.2	B930036N10Rik	1.02	0.99	1.41	0.72	1.16	6.54	6.58
ENSMUSG00000009292.17	Trpm2	1.13	0.88	1.08	0.79	1.14	5.59	7.13
ENSMUSG00000032537.14	Ephb1	0.42	0.37	0.44	0.62	0.66	6.63	6.07
ENSMUSG00000019564.12	Arid3a	0.87	1.6	1.01	0.85	0.87	6.5	6.11
ENSMUSG00000038292.12	Ccdc155	0.24	0.49	0.46	0.1	0.21	6.19	6.36
ENSMUSG00000006219.12	Fblim1	1.27	0.97	0.84	1.51	0.89	5.85	6.27
ENSMUSG00000087644.1	Gm14703	0.31	0.16	0.39	0.33	0.31	5.58	5.66
ENSMUSG00000032500.10	Dclk3	0.94	1.23	0.88	0.62	0.63	5.35	5.89
ENSMUSG00000103403.1	Gm37931	0.44	0.55	0.57	0.75	0.89	5.59	4.7
ENSMUSG00000095992.1	Krtap22-2	0	0	0	24.66	26.24	19362.5	19210.3
ENSMUSG00000056706.2	Krtap7-1	0	0	0	38.99	41.65	18948	18914.6
ENSMUSG00000056270.3	Prr9	0	0	0	68.61	64.15	14040.2	14005.3
ENSMUSG00000068075.2	Gm10229	0	0	0	19.3	14.68	10729	10724.8
ENSMUSG00000059632.3	Krtap8-1	0	0	0	23.6	19.8	9838.9	9759.21
ENSMUSG00000051879.3	Krt71	0	0	0	59.86	57.68	8292.24	8240.25
ENSMUSG00000022931.7	Krtap15	0	0	0	12.23	14.37	7292.42	7219.72
ENSMUSG00000062400.2	Krtap6-5	0	0	0	12.16	11.9	6578.9	6599.71
ENSMUSG00000047564.4	Krtap3-1	0	0	0	19.95	26.9	6357.66	6265.09
ENSMUSG00000017588.2	Krt27	0	0	0	40.3	36.97	6051.62	5973.15
ENSMUSG00000057174.4	Krtap19-9b	0	0	0	5.77	5.33	5620.9	5460.1
ENSMUSG00000068074.2	Gm10228	0	0	0	7.51	8.56	5346.93	5393.08
ENSMUSG00000074928.4	Krtap14	0	0	0	10.2	9.87	5347.27	5276.55
ENSMUSG00000058172.1	Krtap6-1	0	0	0	7.49	9.41	5098.55	5089.18
ENSMUSG00000060469.3	Krtap19-3	0	0	0	5.88	4.68	4349.49	4336.63
ENSMUSG00000068073.2	1110025L11Rik	0	0	0	5.73	4.17	3737.09	3828.5
ENSMUSG00000057674.3	Gm11938	0	0	0	11.28	8.52	3013.2	2942.2
ENSMUSG00000096534.2	Krtap16-3	0	0	0	3.18	2.44	2992.83	2961.5
ENSMUSG00000069722.4	Krtap3-3	0	0	0	27.22	35.36	2985.62	2896.86
ENSMUSG00000062278.2	Gm11562	0	0	0	11.35	8.98	2775.6	2692.74
ENSMUSG00000091212.1	Krtap11-1	0	0	0	8.08	8.27	2712.95	2675.79
ENSMUSG00000047253.4	Krtap1-5	0	0	0	2.53	2.53	2581.15	2564.4
ENSMUSG00000067613.5	5430421N21Rik	0	0	0	10.34	9.94	2485.97	2423.43
ENSMUSG00000058725.1	Gm11937	0	0	0	14.14	15.64	2550.39	2346.96
ENSMUSG00000089724.1	Krtap4-8	0	0	0	13.81	9.4	2446.92	2341.38
ENSMUSG00000078668.3	Gm11595	0	0	0	12.07	8.54	2351.45	2247.14
ENSMUSG00000035831.2	Krt25	0	0	0	16.27	14.49	2222.07	2190.15
ENSMUSG00000075566.2	Krtap4-6	0	0	0	11.89	9.61	2200.64	2103.92
ENSMUSG00000060756.5	Krtap2-4	0	0	0	8.03	5.59	2092.77	2096.32
ENSMUSG00000035592.2	Krt33a	0	0	0	8.68	7.98	1974.61	1970.22
ENSMUSG00000045109.6	Krtap4-7	0	0	0	8.19	6.23	1885.18	1816.75
ENSMUSG00000068068.1	Gm7735	0	0	0	0	0	1908.05	1783.63
ENSMUSG00000078262.5	Krtap4-9	0	0	0	11.4	9.73	1832.25	1778.2
ENSMUSG00000069721.2	Krtap3-2	0	0	0	50.07	60.86	1781.18	1783.06
ENSMUSG00000058368.2	Krtap21-1	0	0	0	7.52	6.85	1679.27	1711.02
ENSMUSG00000056605.6	Krt72	0	0	0	5.14	3.18	1700.24	1656.44
ENSMUSG00000067615.3	Krt81	0	0	0	6.65	5.91	1621.93	1602.08
ENSMUSG00000048294.4	Krtap4-13	0	0	0	12.69	9.55	1594.39	1580.31
ENSMUSG00000068071.2	Gm6358	0	0	0	1.8	0	1597.48	1560.49
ENSMUSG00000078130.4	Gm11555	0	0	0	7.72	6.69	1561.28	1497.97
ENSMUSG00000051802.2	Krtap19-5	0	0	0	1.85	1.85	1481.2	1511.88
ENSMUSG00000057723.3	Krt33b	0	0	0	6.72	7.21	1400.78	1392.15
ENSMUSG00000062433.3	Krtap6-2	0	0	0	4.19	4.41	1368.46	1367.97
ENSMUSG00000078261.1	Gm11596	0	0	0	8.76	7.24	1323.48	1267.35
ENSMUSG00000044649.4	Krtap4-2	0	0	0	3.92	4.75	1286.09	1271.64
ENSMUSG00000046474.9	Krtap4-16	0	0	0	6.82	5.74	1291.28	1266.18
ENSMUSG00000063251.6	Krtap4-1	0	0	0	6.07	5.33	1290.19	1261.74
ENSMUSG00000056350.6	Krtap13-1	0	0	0	9.57	7.3	1174.53	1128.69
ENSMUSG00000071471.2	Krtap26-1	0	0	0	5.2	4.2	1151.73	1140.77
ENSMUSG00000094913.2	Gm9507	0	0	0	8.03	9.46	1161.51	1128
ENSMUSG00000049809.2	Krtap9-3	0	0	0	6.13	6.46	1129.78	1104.45
ENSMUSG00000069583.1	Krtap12-1	0	0	0	10.07	6.46	1099.61	1096.57
ENSMUSG00000063661.5	Krt73	0	0	0	4.41	4.33	1083.68	1073.17
ENSMUSG00000067614.4	Krt86	0	0	0	4.91	4.07	1079.01	1062.95
ENSMUSG00000078680.3	Mup10	0	0	0	21.77	20.4	1075.42	1065.33
ENSMUSG00000048981.1	Krt31	0	0	0	5.79	4.74	1066.87	1056.5
ENSMUSG00000057650.2	Krtap19-2	0	0	0	0.82	0.69	987.76	992.56
ENSMUSG00000048643.4	Krtap19-9a	0	0	0	0	0	972.52	961.29
ENSMUSG00000043485.2	Krt34	0	0	0	2.72	2.65	964.63	947.02
ENSMUSG00000069717.7	Gm11568	0	0	0	5.34	4.78	968.33	929.04
ENSMUSG00000057855.2	Krtap6-3	0	0	0	0.29	0	937.53	908.82
ENSMUSG00000069718.4	Gm11563	0	0	0	3.68	3.33	930.79	896.62
ENSMUSG00000048013.9	Krt35	0	0	0	4.59	4.11	901.69	889.15
ENSMUSG00000078260.1	Gm11569	0	0	0	9.28	6.98	858.29	848.9
ENSMUSG00000069582.3	Krtap10-4	0	0	0	5.76	3.77	856.48	833.73
ENSMUSG00000071195.3	Gm10318	0	0	0	4.55	4.9	816.03	794.49
ENSMUSG00000078131.1	Krtap1-3	0	0	0	4.29	3.36	775.29	754.71
ENSMUSG00000096421.1	Gm10100	0	0	0	9.05	5.04	764.69	713.76
ENSMUSG00000075570.2	Krt26	0	0	0	1.47	1.47	720.89	708.06
ENSMUSG00000078258.1	Gm11564	0	0	0	9.46	8.62	722.41	689.8
ENSMUSG00000094012.1	Gm10024	0	0	0	5.15	5.58	690.76	697.86
ENSMUSG00000078252.1	Krtap17-1	0	0	0	5.19	5.75	673.17	639.15
ENSMUSG00000027908.2	Tchhl1	0	0	0	2.64	2.7	615.04	619.51
ENSMUSG00000044227.5	Gm9789	0	0	0	0.18	0.29	612.87	595.11
ENSMUSG00000096131.2	Gm2696	0	0	0	5.55	3.52	626.18	574.61
ENSMUSG00000059113.2	Gm10061	0	0	0	0.53	0.22	589.68	608.23
ENSMUSG00000095970.1	Gm19402	0	0	0	3.29	1.78	590.6	574.72
ENSMUSG00000070335.4	Krtap9-1	0	0	0	3.73	2.42	581.84	574.81
ENSMUSG00000047641.7	Krt83	0	0	0	4.52	3.75	585.77	569.9
ENSMUSG00000078259.3	Gm11554	0	0	0	4.35	4.57	572.71	577.61
ENSMUSG00000059845.5	Gm11567	0	0	0	2.68	2.14	557.05	535.37
ENSMUSG00000094120.1	Gm3233	0	0	0	4.12	4.52	541.95	549.63
ENSMUSG00000075567.4	Krtap1-4	0	0	0	3.79	3.36	558.78	521.97
ENSMUSG00000078256.3	Gm11565	0	0	0	2.32	1.33	508.47	510.44
ENSMUSG00000090225.1	Gm11559	0	0	0	2.17	2.1	488.37	473.31
ENSMUSG00000106686.1	AC153874.1	0	0	0	3.89	3.2	483.59	432.66
ENSMUSG00000096481.1	Gm3250	0	0	0	4.29	2.58	468.91	442.35
ENSMUSG00000060691.3	Krtap19-1	0	0	0	0.65	0.25	440.32	419.95
ENSMUSG00000078253.3	Krtap16-1	0	0	0	1.56	1.55	428.43	423.35
ENSMUSG00000069584.3	Gm10272	0	0	0	1.95	3.32	417.2	423.53
ENSMUSG00000078674.2	Mup18	0	0	0	5.91	5.84	399.59	418.51
ENSMUSG00000046095.5	Krt32	0	0	0	15.92	9.65	407.67	400.97
ENSMUSG00000068067.2	1110057P08Rik	0	0	0	0.13	0	406.04	393.15
ENSMUSG00000046259.2	Sprr2h	0	0	0	14.29	13.96	392.7	392.23
ENSMUSG00000095817.1	Gm3238	0	0	0	2.79	2.65	373.71	381.36
ENSMUSG00000066100.7	Krtap5-1	0	0	0	4.19	2.99	394.25	358.72
ENSMUSG00000043982.2	Krtap19-4	0	0	0	1.25	0.47	394.74	353.25
ENSMUSG00000103523.1	2210017I01Rik	0	0	0	23.63	19.37	374.81	371.3
ENSMUSG00000095593.1	Gm7138	0	0	0	1.72	2.2	377.5	337.03
ENSMUSG00000094146.1	Gm10142	0	0	0	3.8	4.33	333.27	307.73
ENSMUSG00000091039.1	Krtap20-2	0	0	0	0	0.54	320.67	312.87
ENSMUSG00000045236.4	Krtap5-4	0	0	0	3.22	3.4	310.02	293.49
ENSMUSG00000096380.1	Gm19668	0	0	0	2.27	1.84	307.08	292.68
ENSMUSG00000101315.1	Krtap28-13	0	0	0	3.6	2.32	299.93	293.65
ENSMUSG00000022986.5	Krt75	0	0	0	4.94	4.31	293.56	294.43
ENSMUSG00000073785.2	Krtap5-5	0	0	0	2.89	2.3	296.27	281.88
ENSMUSG00000034159.12	2310007B03Rik	0	0	0	25.05	24.46	263.77	263.75
ENSMUSG00000078132.1	Gm11939	0	0	0	0	0.48	213.27	238.99
ENSMUSG00000070334.4	Krtap31-1	0	0	0	1.35	0.58	220.71	212.11
ENSMUSG00000089731.3	Gm10013	0	0	0	3.68	1.73	221.54	209.97
ENSMUSG00000028972.11	Car6	0	0	0	19.81	25.83	211.02	217.07
ENSMUSG00000090455.2	Gm2431	0	0	0	1.49	1.86	218.81	206.51
ENSMUSG00000104423.1	A030005K14Rik	0	0	0	2.15	1.61	211.08	205.24
ENSMUSG00000073786.1	Gm7579	0	0	0	2.19	1.43	206.96	202.04
ENSMUSG00000056885.5	Gm4559	0	0	0	1.57	0.19	182.42	186.27
ENSMUSG00000076037.1	Gm22752	0	0	0	0	0	171.12	133.36
ENSMUSG00000100190.1	Krtap28-10	0	0	0	1.24	1.31	145.77	147.37
ENSMUSG00000050239.2	Krtap24-1	0	0	0	0.67	0.93	144.54	142.14
ENSMUSG00000073834.10	Mup11	0	0	0	0.5	0.38	121.9	122.28
ENSMUSG00000054759.6	Krtap5-2	0	0	0	2	1.61	117.96	122.71
ENSMUSG00000090471.1	Gm4553	0	0	0	1.7	1.31	112.07	108
ENSMUSG00000095721.1	Gm7137	0	0	0	1.24	1.02	106.46	101.7
ENSMUSG00000078270.3	Gm14193	0	0	0	0	0	109.44	88.99
ENSMUSG00000059169.9	Krt40	0	0	0	0.18	0.54	97.23	91.34
ENSMUSG00000093314.1	Mir5136	0	0	0	0	28.87	58.89	112.01
ENSMUSG00000049548.8	Krt82	0	0	0	0.36	0.48	86.1	84.68
ENSMUSG00000038599.14	Capn8	0	0	0	0.22	0.27	77.92	74.85
ENSMUSG00000025330.6	Padi4	0	0	0	4.95	4.26	74.17	78.6
ENSMUSG00000080486.1	Snord100	0	0	0	0	0	100.69	42.68
ENSMUSG00000001655.6	Hoxc13	0	0	0	3.24	3.93	67.07	71.09
ENSMUSG00000040055.8	Gjb6	0	0	0	4.22	3.45	66	65.37
ENSMUSG00000051481.5	Krtap31-2	0	0	0	0.16	0.21	68.18	63.07
ENSMUSG00000029282.3	Amtn	0	0	0	0	0	61.51	59.19
ENSMUSG00000025431.4	Crisp1	0	0	0	0.11	0.05	55.35	60.58
ENSMUSG00000038560.7	Sp6	0	0	0	9.77	9.22	51.18	48.93
ENSMUSG00000061584.6	Lyg2	0	0	0	0.74	0.64	46.49	47.02
ENSMUSG00000078675.9	Mup16	0	0	0	0.64	1.43	52.68	38.17
ENSMUSG00000050704.3	2310061N02Rik	0	0	0	0.12	0.1	46.38	43.36
ENSMUSG00000039639.6	Kcne1	0	0	0	0.09	0.58	39.08	39.95
ENSMUSG00000082020.1	Gm14182	0	0	0	0	0	36.18	38.63
ENSMUSG00000064165.8	Krt39	0	0	0	0.28	0.34	36.2	36.43
ENSMUSG00000020916.8	Krt36	0	0	0	0.39	0.33	37	34.12
ENSMUSG00000002057.4	Foxn1	0	0	0	5.86	5.82	33.67	34.64
ENSMUSG00000078254.1	Krtap29-1	0	0	0	0.29	0	33.25	34.87
ENSMUSG00000073830.11	Mup14	0	0	0	0	0	36.81	31.22
ENSMUSG00000078673.10	Mup19	0	0	0	5.21	0.29	28.8	34.45
ENSMUSG00000096826.1	Ccl27b	0	0	0	0	8.59	26.7	34.64
ENSMUSG00000046490.7	Rnf222	0	0	0	4.93	4.98	29.38	28.18
ENSMUSG00000044243.3	Bhlha9	0	0	0	0.5	1.08	26.37	26.44
ENSMUSG00000066101.4	Gm10153	0	0	0	0.77	0	27.71	22.71
ENSMUSG00000022229.2	Atp12a	0	0	0	2.89	2.88	24.15	24.51
ENSMUSG00000064427.1	Gm22748	0	0	0	5.58	0	17.12	29.26
ENSMUSG00000027403.12	Tgm6	0	0	0	0.11	0.07	22.58	22.27
ENSMUSG00000068407.2	Rnase12	0	0	0	1.71	0.68	20.25	20.87
ENSMUSG00000105039.1	Gm42637	0	0	0	0.73	1.27	20.16	20.26
ENSMUSG00000066270.3	Gm10157	0	0	0	0	7.03	21.85	18.15
ENSMUSG00000064952.1	Gm24920	0	0	0	0	0	17.73	22.25
ENSMUSG00000061144.5	Spink12	0	0	0	0.76	1.19	19.53	20.19
ENSMUSG00000104750.1	AC034285.1	0	0	0	0	0	13.81	25.53
ENSMUSG00000087273.1	Gm13203	0	0	0	1.96	2.02	21.16	18.06
ENSMUSG00000078263.1	Gm14188	0	0	0	0	0	13.33	25.47
ENSMUSG00000050201.9	Otop2	0	0	0	0.28	0.21	18.61	19.44
ENSMUSG00000078255.1	Krtap9-5	0	0	0	0.27	0	20.63	17.24
ENSMUSG00000090515.2	Krtap27-1	0	0	0	0.15	0.27	18.24	16.38
ENSMUSG00000032327.14	Stra6	0	0	0	1.67	1.48	17.7	15.66
ENSMUSG00000087383.7	Gm12446	0	0	0	0.13	0.23	11.79	15.46
ENSMUSG00000055194.3	Actbl2	0	0	0	0.05	0.02	13.53	12.47
ENSMUSG00000047109.12	Cldn14	0	0	0	0.25	0.1	13.98	11.85
ENSMUSG00000085683.1	9130409J20Rik	0	0	0	0.92	0.95	12.01	13.28
ENSMUSG00000001804.9	Dsg4	0	0	0	0.02	0.06	12.91	12.19
ENSMUSG00000023387.7	Kcnk16	0	0	0	0.05	0	12.88	12.11
ENSMUSG00000038721.8	Hoxb7	0	0	0	0.09	0.22	9.09	9.41
ENSMUSG00000037727.6	Avp	0	0	0	0.9	1.54	7.14	8.66
ENSMUSG00000079186.2	Gzmc	0	0	0	1.16	1.06	7.23	8.29
ENSMUSG00000077505.1	Gm24233	0	0	0	2.02	0	9.54	5.85
ENSMUSG00000085111.3	Ascl4	0	0	0	0.3	0.4	7.45	6.64
ENSMUSG00000050623.4	Tex40	0	0	0	0.94	0.82	7.44	6.56
ENSMUSG00000054005.4	Mill1	0	0	0	1.43	1.17	7.57	6.28
ENSMUSG00000039385.4	Cdh6	0	0	0	0.26	0.18	6.4	6.85
ENSMUSG00000046248.9	Krtap5-3	0	0	0	0.49	0.47	5.95	5.73
ENSMUSG00000096674.1	Mup15	0	0	0	0	0	4.19	7.24
ENSMUSG00000000690.5	Hoxb6	0	0	0	0	0	5.57	5.85
ENSMUSG00000066154.11	Mup3	0	0	0	0.81	0.9	5.11	6
ENSMUSG00000025433.7	Crisp3	0	0	0	0.03	0	5.73	5.27
ENSMUSG00000063232.16	Serpina11	0	0	0	0.24	0.44	5.59	5.33
ENSMUSG00000086144.1	Gm11379	0	0	0	0	1.76	1.85	8.98
ENSMUSG00000028186.14	Uox	0	0	0	0.1	0.21	5.68	4.98
ENSMUSG00000097604.1	Gm17322	0	0	0	0.36	0.37	5.23	5.38
ENSMUSG00000096688.1	Mup17	0	0	0	0.34	0	5.5	4.79
ENSMUSG00000041608.7	Entpd3	0	0	0	0.72	0.43	4.87	5.3
ENSMUSG00000001657.7	Hoxc8	0.04	0	0.11	0	0	4.98	5.32
ENSMUSG00000001021.12	S100a3	1.6	2.21	1.54	87.03	96.48	9494.61	9432.94
ENSMUSG00000050359.7	Sprr1a	0.13	0	0.46	700.94	708.7	5777.16	5640.99
ENSMUSG00000035557.9	Krt17	1.27	2.27	1.19	635.04	579.99	3734.2	3680.43
ENSMUSG00000024409.8	Psors1c2	0.5	0.23	1.17	64.51	59.29	2742.1	2750.66
ENSMUSG00000011632.7	Pinlyp	0	0.23	0.15	71.95	64.97	2533.9	2544.25
ENSMUSG00000055937.1	Krt28	0.23	0.1	0.2	7.15	6.89	2182.89	2150.55
ENSMUSG00000052415.5	Tchh	0.34	0.38	0.34	10.46	9.9	2112.4	2035.1
ENSMUSG00000063651.11	Cnfn	0.25	0	0.28	431.12	365.06	2040.18	1990.36
ENSMUSG00000030905.5	Crym	0.03	0	0.08	5.26	4.62	1439.74	1436.73
ENSMUSG00000030205.15	Gprc5d	0	0	0.08	5.22	5.23	1350.68	1356.11
ENSMUSG00000050953.9	Gja1	6.85	6.69	7.51	93.59	97.83	1101.69	1076.92
ENSMUSG00000101026.1	D730001G18Rik	0.06	0	0.07	8.06	7.7	569.6	568.96
ENSMUSG00000073413.9	Ly6g6d	0.23	0.52	0.3	5.15	5.95	385.66	422.79
ENSMUSG00000078657.6	Crnn	0.06	0.1	0.2	3.2	2.86	355.54	358.32
ENSMUSG00000046352.7	Gjb2	0.07	0	0	11.54	11.74	300.18	299.31
ENSMUSG00000049598.9	Vsig8	0.37	0.44	0.36	3.36	2.84	278.73	283.73
ENSMUSG00000028751.13	Pla2g2e	0.41	1.8	0.86	41.39	46.09	236.96	234.78
ENSMUSG00000001510.8	Dlx3	0.27	0.48	0.12	18.74	18.32	207.69	206.74
ENSMUSG00000046694.6	Fam46b	1.02	1.52	0.59	29.18	24.72	204.26	206.26
ENSMUSG00000052316.9	Lrrc15	0.13	0.11	0.19	2.13	2	199.28	200.29
ENSMUSG00000057829.5	Gm5278	0.23	0	0	0.79	0.67	149.44	141.75
ENSMUSG00000044139.12	Prss53	0.82	0	1.55	6.04	6.06	141.2	133.13
ENSMUSG00000042532.14	Golga7b	0.59	0.66	0.69	4.73	4.58	103.24	105.38
ENSMUSG00000042808.7	Gpx2	0.94	0.81	0.8	6.19	6.22	95.52	97.82
ENSMUSG00000019987.8	Arg1	0.77	0.23	0.15	9.03	7.64	85.6	86.25
ENSMUSG00000025739.13	Gng13	1.16	0	0	2.76	3.14	88.35	82.42
ENSMUSG00000029819.6	Npy	0.87	0	0.76	8.15	6.13	75.89	66.47
ENSMUSG00000039508.5	Fam26d	0.02	0	0.11	0.23	0.23	69.74	66.14
ENSMUSG00000046157.13	Tmem229b	1.54	1.98	1.72	10.22	8.9	66.3	66.81
ENSMUSG00000021469.9	Msx2	1.49	1.92	1.43	10.42	10.69	66.21	65.55
ENSMUSG00000027801.7	Tm4sf4	0.06	0	0	0.1	0.19	59.65	60.17
ENSMUSG00000043461.13	Sptssb	0	0.09	0	1.56	2.68	48.66	51.77
ENSMUSG00000020159.8	Gabrp	0	0.05	0	0.82	0.49	51.05	48.17
ENSMUSG00000044294.7	Krt84	0.03	0	0.08	0.75	0.74	45.75	44.32
ENSMUSG00000062380.3	Tubb3	0.05	0	0.06	3.4	2.95	40.69	40.09
ENSMUSG00000054083.7	Capn12	0.33	0.23	0.27	1.7	1.53	36.79	36.8
ENSMUSG00000024331.11	Dsc2	0.25	0.3	0.24	1.5	1.69	30.11	29.36
ENSMUSG00000054753.9	AU018091	0.04	0	0.04	0.43	0.34	23.19	21.96
ENSMUSG00000027186.14	Elf5	0.55	0.21	0.41	3.53	2.71	20.45	20.13
ENSMUSG00000027579.6	Srms	0.17	0.12	0.04	1.3	0.85	15.46	15.73
ENSMUSG00000028865.13	Cd164l2	0.1	0	0.6	1.8	2.02	15.99	11.22
ENSMUSG00000032726.12	Bmp8a	0	0.07	0	0.36	0.18	12.54	12.54
ENSMUSG00000037846.18	Rtkn2	0.07	0	0.03	0.26	0.54	10.1	9.62
ENSMUSG00000044164.2	Rnf182	0	0	0.03	0.19	0.27	8.27	7.68
ENSMUSG00000090223.1	Pcp4	0	0	0.21	0.7	1.48	6.58	7.12
ENSMUSG00000058260.2	Serpina9	0.1	0.31	0.15	1.14	1.1	5.41	5.95
ENSMUSG00000028528.16	Dnajc6	0.05	0	0.04	0.4	0.33	5.3	5.16

## Sheet: Ear, telogen
Gene ID	Gene name	Cartilage/muscle 1	Cartilage/muscle 2	Cartilage/muscle 3	Ear, telogen, 1	Ear telogen, 2	Dorsal, telogen 1	Dorsal telogen 2
ENSMUSG00000064201.8	Krt2	0	0.06	0.08	6849.31	6435.51	0.3	0.51
ENSMUSG00000001506.10	Col1a1	126.31	143.16	122.54	3156.22	3511.42	336.61	332.75
ENSMUSG00000026043.18	Col3a1	140.69	148.87	146.55	2645.21	2654.46	296.59	297.35
ENSMUSG00000029661.16	Col1a2	260.01	283.56	252.67	2498.66	2421.07	212.85	215.61
ENSMUSG00000043165.7	Lor	0.26	0.28	0.06	2738.52	2153.17	199.78	188.91
ENSMUSG00000019761.9	Krt10	3.08	2.07	3.05	2295.54	2374.69	148.77	141.11
ENSMUSG00000022596.3	Slurp1	35.23	42.68	32.69	1363.07	1146	43.24	39.27
ENSMUSG00000049404.7	Rarres1	29.58	32.56	29.27	962.87	880.59	17.29	17.39
ENSMUSG00000032262.13	Elovl4	1.88	1.13	1.59	748.33	782.63	106.54	108.94
ENSMUSG00000038754.4	Elovl3	0.63	0.11	0.36	651.1	669.04	116.74	121.65
ENSMUSG00000059751.7	Rps3a3	0.53	0.17	0.64	605.07	606.07	0.29	0
ENSMUSG00000029373.7	Pf4	92.54	83.67	101.26	542.93	488.88	93.44	96.48
ENSMUSG00000060586.10	H2-Eb1	48.2	55.61	45	436.14	429.56	84.47	85.88
ENSMUSG00000031604.10	Msmo1	11.03	8.49	9.6	435.15	414.01	64.37	65.5
ENSMUSG00000075605.3	2300005B03Rik	2.54	6.79	2.67	384.15	401.8	1.63	0.45
ENSMUSG00000020017.14	Hal	4.18	6.39	4.39	381.23	364.68	31.31	30.37
ENSMUSG00000028148.11	Them5	0.23	0.14	0.18	357.65	385.18	29.74	27.56
ENSMUSG00000008206.15	Cers4	8.31	11.88	9.8	343.24	329.68	27.48	28.67
ENSMUSG00000033579.16	Fa2h	0.13	0.21	0.05	359.7	312.74	12.12	11.21
ENSMUSG00000027750.16	Postn	8.36	9.27	9.86	304.13	327.19	37.45	33.48
ENSMUSG00000029059.9	Fam213b	22.35	29.27	23.75	272.64	266.21	53.46	51.75
ENSMUSG00000081169.1	Gm12551	0.16	0.29	0	247.67	251.13	2.2	2.91
ENSMUSG00000028988.13	Ctnnbip1	23.5	23.48	23.25	240.44	248.42	43.11	39.54
ENSMUSG00000074489.9	Bglap3	1.35	1.86	1.05	217.29	222.65	12.77	11.13
ENSMUSG00000047730.17	Fcgbp	0.03	0.03	0	207.04	214.61	41.69	42.44
ENSMUSG00000039481.5	Nrtn	4.55	6.29	3.2	248.1	168.23	35.12	31.41
ENSMUSG00000022225.6	Cma1	2.89	3.38	3.12	212.17	193.44	22.24	25.58
ENSMUSG00000025213.11	Kazald1	13.46	13.04	11.85	199.72	195.24	5.42	5.83
ENSMUSG00000021884.17	Hacl1	7.82	6.86	9.87	190.73	189.97	4.76	4.24
ENSMUSG00000030303.15	Far2	0.95	0.92	1.47	169.42	175.18	5.76	5.43
ENSMUSG00000023247.2	Guca2a	0.2	0.39	0.24	180.91	153.63	3.98	3.76
ENSMUSG00000035493.9	Tgfbi	22.46	28.42	20.74	167.02	150.88	26.32	29.74
ENSMUSG00000032281.11	Acsbg1	3.07	3.66	3.83	170.23	146.04	21.08	21.71
ENSMUSG00000026073.13	Il1r2	1.74	3.08	1.86	159.34	146.97	28.39	27.29
ENSMUSG00000038642.10	Ctss	22.16	18.13	19.85	144.54	147.47	28.45	28.44
ENSMUSG00000028262.13	Clca3a2	0.11	0	0.06	138.49	139.18	14.49	14.3
ENSMUSG00000074207.10	Adh1	19.06	25.31	23.37	131.13	143.62	15.16	17.73
ENSMUSG00000025064.14	Col17a1	0.27	0.05	0.56	140.23	117.28	22.58	21.79
ENSMUSG00000028236.3	Sdr16c5	0.07	0.12	0.08	122.78	129.01	13.66	16.07
ENSMUSG00000053765.4	Oas1f	0.14	0	0.07	128.4	116.38	9.53	9.67
ENSMUSG00000021792.15	Fam213a	21.84	17.38	18.59	112.11	124.5	19.88	19.63
ENSMUSG00000038217.13	Tlcd2	13.21	10.8	9.38	112.57	115.18	7.84	8.73
ENSMUSG00000035376.9	Hacd2	8.76	7.48	7.73	112.35	109.34	14.9	14.95
ENSMUSG00000054196.6	Cthrc1	4.21	3.66	3.62	108.22	112.84	2.76	2.36
ENSMUSG00000026450.14	Chit1	0.61	1.47	0.57	111.31	101.25	11.34	11.64
ENSMUSG00000059956.14	Serpinb12	0.06	0.31	0	95.66	101.33	0.54	0.57
ENSMUSG00000047250.13	Ptgs1	3.34	3	2.13	104.2	92.74	9.15	8.76
ENSMUSG00000026675.12	Hsd17b7	4.87	4.61	4.23	88.58	102.12	9.24	10.3
ENSMUSG00000060560.8	Ces4a	0.04	0	0.04	88.33	82.08	0.78	0.99
ENSMUSG00000044244.18	Il20rb	4.15	4.07	3.76	84.88	80.79	12.41	10.81
ENSMUSG00000042684.8	Npl	1.37	1.25	1.04	79.5	83.54	14.35	15.45
ENSMUSG00000028100.11	Nudt17	7.29	9.42	6.08	79	83.69	14.81	14.31
ENSMUSG00000067616.11	Klk11	2.94	4.09	3.29	82	77.89	7.18	7.12
ENSMUSG00000001865.2	Cpa3	1.46	1.05	1.13	74.62	81.98	11.31	12.78
ENSMUSG00000043613.7	Mmp3	4.05	4.82	3.61	77.97	77.57	7.37	8.09
ENSMUSG00000041567.3	Serpina12	0.17	0.54	0.24	73.69	81.68	9.37	10.02
ENSMUSG00000030946.12	Lhpp	1.33	2.44	2.11	79.51	75.04	12.49	11.44
ENSMUSG00000043068.5	Fam89a	0.73	1.18	1.27	79.96	74.05	12.53	12.54
ENSMUSG00000093483.1	AA465934	9.39	7.83	6.52	76.32	76.93	10.55	10.51
ENSMUSG00000043419.10	Chd3os	1.39	1.23	1.41	76.87	74.19	15.88	13.34
ENSMUSG00000096243.1	Gm24265	0	10.55	11.87	67.14	82.71	6.16	5.01
ENSMUSG00000041735.7	Gm13178	0.16	0	0.46	75.23	74.26	12.65	12.97
ENSMUSG00000027380.10	Acoxl	0	0.21	0	74.55	70.49	1.54	0.53
ENSMUSG00000021263.10	Degs2	3.54	3.97	3.56	74.93	69.61	3.83	2.86
ENSMUSG00000086962.3	Gm12248	0.33	0	0.38	66.8	76.72	0.26	0.32
ENSMUSG00000019368.13	Sec14l4	4.21	4.34	4.38	75.63	65.41	3.69	3.49
ENSMUSG00000093507.1	Gm20627	0.5	0.43	0.25	73.74	61.88	4.3	4.91
ENSMUSG00000063522.5	2010109I03Rik	2.09	1.59	1.39	69.25	65.62	6.05	5.68
ENSMUSG00000034308.13	Sdr42e1	1.16	1.44	1.22	68.89	62.01	12.14	11.74
ENSMUSG00000057933.10	Gsta2	0	0.27	0	66.04	64.46	4.85	3.28
ENSMUSG00000090121.10	Abhd12b	0.26	0.05	0.11	59.7	63.82	2.11	2.14
ENSMUSG00000066364.2	Serpina3b	0.04	0	0.1	59.54	61.83	5.96	7.49
ENSMUSG00000025650.12	Col7a1	2.57	2.96	4.02	63.33	54.03	8.66	10.59
ENSMUSG00000027456.8	Sdcbp2	0.75	0.61	0.47	61.32	54.69	6.72	7.9
ENSMUSG00000069049.11	Eif2s3y	0.21	0.4	0	56.94	58.59	0	0.2
ENSMUSG00000044103.4	Il1f9	0.57	0.65	0.91	55.23	55.53	4.62	4.61
ENSMUSG00000008435.15	Rdh13	11.59	10.77	9.74	55.08	53.98	11.39	10.12
ENSMUSG00000033105.12	Lss	3.37	3.18	3.31	57.72	51.15	10.55	7.33
ENSMUSG00000027761.4	Aadac	0	0	0.6	54.59	52.97	6.3	6.26
ENSMUSG00000055301.8	Adh7	1.4	2.29	1.29	50.44	55.48	8.71	9.54
ENSMUSG00000036596.6	Cpz	0.12	0.07	0.14	55.13	48.54	6.12	6.42
ENSMUSG00000035896.4	Rnase1	0.11	0	0.12	54.47	48.5	9.31	9.99
ENSMUSG00000038781.6	Stap2	1.52	2.26	2.93	47.06	50.88	7.15	6.47
ENSMUSG00000050463.8	Krt78	0	0	0.03	58.22	38.34	9.63	8.05
ENSMUSG00000066441.14	Rdh11	3.9	5.49	3.99	50.6	45.37	7.89	8.34
ENSMUSG00000045502.6	Hcar2	6.78	6.88	7.71	48.38	47.01	6.81	6.92
ENSMUSG00000039092.9	Sptlc3	0.12	0.07	0.09	47.97	47.39	4.99	4.51
ENSMUSG00000027253.15	Lrp4	2.74	2.74	2.95	42.26	49.02	5.45	5.25
ENSMUSG00000066704.6	Cyp2b19	0	0	0.05	45.4	43.64	6.78	6.72
ENSMUSG00000042845.7	Wfdc12	2.67	2.62	0.65	41.16	44.89	1.22	1.52
ENSMUSG00000090084.7	Srpx	4.24	6.06	6.2	44.53	40.84	6.34	6.35
ENSMUSG00000060096.4	Amd-ps3	2.19	1.97	6.27	44.39	40.39	3.68	0.39
ENSMUSG00000029061.2	Mmp23	4.79	7.39	4.79	44.12	39.82	8.29	7.02
ENSMUSG00000032224.14	Fam81a	2.57	1.55	1.75	37.59	40.13	4.61	4.14
ENSMUSG00000047884.6	Klk9	1.28	1.72	1.26	35.38	40.37	5.76	4.38
ENSMUSG00000031827.12	Cotl1	5.8	4.9	4.24	37.43	37.64	7.01	7.16
ENSMUSG00000063268.12	Parp10	4.19	2.78	4.33	39.81	35.2	5.82	6.61
ENSMUSG00000032265.14	Fam46a	5.19	5	5.29	36.47	38.02	6.39	6.58
ENSMUSG00000022595.7	Lypd2	6.09	2.51	5.86	38.51	33.94	2.78	2.82
ENSMUSG00000020892.10	Aloxe3	0.38	0.52	0.46	35.49	34.07	4.23	3.06
ENSMUSG00000052180.14	Serpinb6c	0.3	0.13	0.25	33.61	35.33	0.23	0.36
ENSMUSG00000021751.13	Acox2	1.14	0.49	1.1	35.87	32.8	1.64	1.52
ENSMUSG00000075595.9	Zfp652	5.96	5.41	5.9	32.57	35.8	3.26	3.32
ENSMUSG00000041449.16	Serpina3h	0.28	0.45	0.17	35.65	32.63	1.67	2.08
ENSMUSG00000026784.14	Pdss1	5.05	3.95	3.7	33.12	35.14	2.6	2.96
ENSMUSG00000074183.3	Gsta1	0.36	0	0	33.96	33.58	2.8	1.8
ENSMUSG00000027246.12	Ell3	0.1	0.2	0.06	33.39	33.91	4.56	4.57
ENSMUSG00000022440.8	C1qtnf6	5.32	6.17	5.02	35.35	30.21	5.8	6.22
ENSMUSG00000008153.11	Clstn3	2.08	2.89	2.21	32.18	32.62	2.14	2.55
ENSMUSG00000026676.7	Ccdc3	5.73	6.13	4.58	33.66	30.22	1.8	3.11
ENSMUSG00000011118.3	Panx3	1.06	1.37	0.9	31.44	31.82	1.01	1.37
ENSMUSG00000067597.5	Dgat2l6	0.06	0.1	0.07	29.58	32.62	0.23	0.11
ENSMUSG00000022382.14	Wnt7b	0	0	0.03	33.43	27.88	5.7	5.58
ENSMUSG00000038354.13	Ankrd35	2.39	2.84	1.96	30.69	29.91	5.43	5.21
ENSMUSG00000056498.13	Tmem154	5.78	6.22	5.7	30.41	29.79	5.92	5.99
ENSMUSG00000040978.4	Gm11992	0.49	0.59	0.47	29.79	30.09	2.98	2.93
ENSMUSG00000025202.7	Scd3	0.12	0.09	0.06	29.35	30.34	2.71	2.97
ENSMUSG00000089789.1	Rdh1	0.55	0.16	0.42	31.38	28.23	1.64	1.67
ENSMUSG00000097354.7	2310001H17Rik	1.46	2.76	1.57	28.45	27.76	5.18	5.46
ENSMUSG00000048251.15	Bcl11b	0.23	0.37	0.25	30.6	25.35	4.85	4.76
ENSMUSG00000026414.13	Tnnt2	2.24	2.92	3.39	25.79	29.47	3.67	4.73
ENSMUSG00000030077.11	Chl1	0.22	0.23	0.17	28.03	27.12	2.97	3.63
ENSMUSG00000002033.13	Cd3g	0.5	0.36	0.11	25.74	28.38	4.01	3.51
ENSMUSG00000027947.11	Il6ra	4.95	5.41	5.11	26.75	26.66	4.59	3.91
ENSMUSG00000002111.8	Spi1	4.44	5.97	3.75	27.98	25.37	3.82	2.56
ENSMUSG00000024810.16	Il33	2.25	2.02	2.18	23.86	24.8	3.82	3.63
ENSMUSG00000044934.12	Zfp367	4.22	3.28	3.88	21.38	23.84	4.67	4.29
ENSMUSG00000101389.1	Ms4a4a	1.53	3.06	2.5	23.11	21.39	2.51	2.13
ENSMUSG00000032315.5	Cyp1a1	0.88	0.3	0.51	23.11	19.28	0.4	0.64
ENSMUSG00000058966.13	Fam57b	1.66	3.92	2.5	20.49	19.38	0.35	0.85
ENSMUSG00000047428.14	Dlk2	0.21	0.77	0.21	21.5	17.9	1.3	1.1
ENSMUSG00000002204.8	Napsa	1.51	0.78	1.31	20.08	17.74	1.58	2.23
ENSMUSG00000064247.14	Plcxd1	1.29	1.85	1.58	20.72	16.02	3.3	1.74
ENSMUSG00000025165.12	Sectm1a	2.6	3.82	2.13	17.95	18.49	2.54	1.98
ENSMUSG00000037548.14	H2-DMb2	1.45	2.02	1.44	17.4	18.38	3.19	3.31
ENSMUSG00000017002.14	Slpi	1.32	2.15	1.9	18.37	17.1	1.67	3.18
ENSMUSG00000076867.2	Trdv4	0	0.66	1.11	17.25	16.76	1.25	1.54
ENSMUSG00000053687.14	Dpep2	1.94	3.38	2.16	17.56	16.45	2.24	2.01
ENSMUSG00000034917.7	Tjp3	0	0	0.03	18.53	14.87	1.54	1.54
ENSMUSG00000018500.2	Adora2b	0.25	0.53	0.4	16.95	16.34	2.52	2.57
ENSMUSG00000023349.14	Clec4n	1.59	1.61	2.24	15.95	17.27	1.38	1.73
ENSMUSG00000034783.7	Cd207	0.19	0	0.07	17.56	14.52	2.49	1.9
ENSMUSG00000036960.10	Clca2	0	0.04	0.04	16.51	15.48	1.61	2.38
ENSMUSG00000032908.9	Sgpp2	0.62	0.23	0.33	16.31	15.55	0.14	0.07
ENSMUSG00000036292.13	Gramd1c	2.78	2.29	2.53	15.88	15.46	2.57	2.38
ENSMUSG00000025934.15	Gsta3	1.79	0.85	0.9	13.81	17.16	1.72	1.83
ENSMUSG00000020785.17	Camkk1	1.79	2.31	2.45	16.08	13.58	2.47	2.31
ENSMUSG00000026220.6	Slc16a14	0.25	0.24	0.16	14.59	14.5	1.19	1.82
ENSMUSG00000087692.1	Gm11940	0	0.75	0	16.99	11.85	1.7	1.04
ENSMUSG00000020553.8	Pctp	2.46	2.69	1.79	14	14.48	1.12	1.39
ENSMUSG00000031220.14	Awat2	0.12	0	0	14.44	13.67	2.23	2.57
ENSMUSG00000037020.16	Wdr62	1.95	4.45	1.71	14.37	13.73	2.88	2.23
ENSMUSG00000068457.14	Uty	2.19	1.02	1.85	13.09	14.74	0.82	0.92
ENSMUSG00000028544.14	Slc5a9	0	0	0.2	13.3	13.84	1.22	0.84
ENSMUSG00000070323.11	Mmp27	0.14	0.2	0.5	13.39	13.61	1.19	0.85
ENSMUSG00000070419.11	Cyp3a57	0.05	0	0	13.18	13.6	0.36	0.41
ENSMUSG00000062593.15	Lilrb4a	2.09	2.53	2.77	13.8	12.85	1.28	1.49
ENSMUSG00000022598.6	Psca	0.37	0.68	0.71	12.83	13.08	2.32	2.05
ENSMUSG00000056069.8	Fam105a	1.72	1.32	1.51	12.9	12.77	1.58	1.77
ENSMUSG00000046523.4	Kctd4	2.08	1.74	1.55	11.98	13.34	1.82	1.86
ENSMUSG00000091575.2	2010016I18Rik	1.34	0.72	0.62	12.75	12.38	0.79	0.86
ENSMUSG00000009248.5	Ascl2	2.27	2.59	1.14	13.36	11.64	1.61	1.33
ENSMUSG00000020838.12	Slc6a4	0.95	0.91	0.86	12.05	12.45	0.85	0.63
ENSMUSG00000032591.15	Mst1	0.29	0.07	0.16	13.45	10.84	0.52	0.56
ENSMUSG00000050390.12	C77080	1.4	2.02	1.53	12.4	11.51	2.4	2.07
ENSMUSG00000015355.13	Cd48	2.07	2.05	1.34	11.96	11.81	2.28	2.29
ENSMUSG00000000120.6	Ngfr	0.68	1.02	1.1	13.26	10.07	1.93	2.11
ENSMUSG00000028976.10	Slc2a5	0.4	0.1	0.03	13.17	9.84	0.43	0.58
ENSMUSG00000058818.13	Pirb	1.85	1.59	2.14	10.97	11.61	2.03	1.81
ENSMUSG00000052889.11	Prkcb	0.56	1.07	0.92	12.31	10.22	2.14	1.79
ENSMUSG00000037617.11	Spag1	0.71	0.58	0.66	11.26	11.17	1.95	2.52
ENSMUSG00000105528.1	Gm43519	0.74	0.26	0.28	10.36	12.05	1.97	1.31
ENSMUSG00000035041.8	Creb3l3	0	0	0.05	11.23	11.12	0.43	0.66
ENSMUSG00000078504.2	Gm438	0.07	0.12	0	11.44	10.71	0.31	0
ENSMUSG00000026458.13	Ppfia4	1.64	1.1	1.71	12.49	9.47	1.36	1.1
ENSMUSG00000032323.13	Cyp11a1	0.16	0.23	0.2	10.5	11.4	0.74	1.05
ENSMUSG00000030543.10	Mesp2	0.09	0	0	10.86	10.27	1	0.93
ENSMUSG00000045362.7	Tnfrsf26	1.27	1.14	1.33	9.96	11.02	0.58	0.62
ENSMUSG00000075593.10	Gal3st4	2.08	1.7	2.26	10.72	10.03	1.64	1.64
ENSMUSG00000013483.14	Card14	0.19	0.26	0.23	11.03	9.36	1.26	1.53
ENSMUSG00000025347.3	Mettl7b	0.64	1.14	0.73	10.06	9.41	1.13	0.86
ENSMUSG00000046908.5	Ltb4r1	0.69	0.73	0.47	10.76	8.05	1.19	1.22
ENSMUSG00000027220.2	Syt13	0.21	0.2	0.19	9.83	8.76	0.07	0.05
ENSMUSG00000001166.17	Oas1c	1.3	1.11	1.09	9.01	9.04	0.62	0.74
ENSMUSG00000053168.5	9030619P08Rik	1.7	1.59	1.57	9.8	8.21	0.87	1.19
ENSMUSG00000035711.4	Dok3	1.16	1.3	1.12	9.96	7.56	0.62	1.39
ENSMUSG00000028488.15	Sh3gl2	0.19	0	0.22	8.66	8.83	1.03	1.07
ENSMUSG00000011034.6	Slc5a1	0.04	0	0	8.47	8.52	1	0.84
ENSMUSG00000017417.14	Plxdc1	1.02	0.97	1.03	8.92	7.64	1.77	1.53
ENSMUSG00000052821.3	Cysltr1	0.48	0.06	0.33	8.41	8.07	0.84	0.6
ENSMUSG00000040229.11	Gpr34	1.16	1.37	1.45	7.51	8.88	1.34	1.44
ENSMUSG00000026928.14	Card9	0.44	0.91	0.65	8.6	7.75	0.04	0.23
ENSMUSG00000030263.13	Lrmp	1.37	1.81	1.6	9.24	6.87	1.47	1.67
ENSMUSG00000031824.14	6430548M08Rik	1.5	1.53	1.6	8.21	7.51	1.23	1.03
ENSMUSG00000045871.4	Slitrk6	0.29	0.14	0.16	8.14	7.55	0.87	0.91
ENSMUSG00000026357.3	Rgs18	0.4	0.47	0.57	7.84	7.76	1.41	1.42
ENSMUSG00000085786.1	Gm15987	1.01	0.85	1.07	8.35	7.21	1.47	1.16
ENSMUSG00000031981.7	Capn9	0.08	0	0	6.91	8.58	0.97	1.93
ENSMUSG00000028730.14	Cfap57	0.02	0.04	0.16	7.57	7.86	1.19	1.16
ENSMUSG00000096001.2	2610528A11Rik	0.16	0	0.18	7.86	7.55	0.25	0.63
ENSMUSG00000005763.15	Cd247	1.3	1.36	1.42	6.99	7.99	1	0.57
ENSMUSG00000030775.9	Trat1	0	1.26	0.19	7.25	7.63	0.65	1.3
ENSMUSG00000069456.4	Rdh16	0.24	0.16	0.31	7.5	7.35	0.32	0.39
ENSMUSG00000037490.5	Slc2a12	1.66	0.95	1.48	7.83	6.94	1.31	1.53
ENSMUSG00000060461.5	Dppa5a	0	0.37	0.44	6.59	7.92	1.02	0.84
ENSMUSG00000024680.12	Ms4a2	0.11	0.13	0.13	7.07	7.07	0.12	0.18
ENSMUSG00000027524.9	Edn3	1.07	0.97	0.62	6.95	7	0.36	0.86
ENSMUSG00000025473.16	Adam8	0.48	0.5	0.77	6.95	6.56	0.81	0.9
ENSMUSG00000026358.13	Rgs1	0.88	1.33	1.2	6.8	6.56	0.37	0.43
ENSMUSG00000029674.13	Limk1	1.07	0.81	0.72	6.88	6.38	1.09	0.56
ENSMUSG00000104835.4	Gm5547	0.6	0	0.32	6.83	6.24	0.91	1.15
ENSMUSG00000073010.9	Gm5127	0.2	0.12	0.12	6.46	6.55	0.08	0.35
ENSMUSG00000097961.1	Gm27000	1.27	0.78	0	6.84	6.06	0	0.28
ENSMUSG00000030742.7	Lat	0.4	0.87	0.8	5.97	6.75	1.27	0.8
ENSMUSG00000027347.18	Rasgrp1	0	0.12	0.18	6.2	6.38	1.13	1.02
ENSMUSG00000082932.3	Cyp2j8	0.19	0.22	0	6.31	6.18	0.05	0.19
ENSMUSG00000018862.11	Otop3	0	0.07	0	6.7	5.69	1.08	0.98
ENSMUSG00000049699.4	Ucn2	0.6	0	0.29	7.03	5.34	0.34	0.34
ENSMUSG00000044165.12	Bcl2l15	0.51	0.71	0	6.36	5.91	0.84	0.67
ENSMUSG00000070547.4	Mrgprb1	0.28	0.04	0.67	4.44	7.8	0.33	0.27
ENSMUSG00000046245.13	Pilra	0.48	0.59	0.73	7.15	5.06	0.36	1.49
ENSMUSG00000052572.15	Dlg2	0	0.08	0.05	5.46	6.39	0.32	0.4
ENSMUSG00000055960.12	Skint4	0.03	0	0.03	6.18	5.57	1.11	1.09
ENSMUSG00000086448.1	9330162012Rik	0.57	0.71	0.44	5.24	5.68	0.88	0.55
ENSMUSG00000030223.14	Ptpro	0.76	1.05	0.85	4.94	5.92	0.89	0.63
ENSMUSG00000078599.9	Skint8	0.67	0.43	0.59	4.61	6.19	0.85	0.6
ENSMUSG00000026321.7	Tnfrsf11a	0.59	1.6	0.8	5.45	5.32	0.32	0.22
ENSMUSG00000038298.14	Pdzk1	0.02	0.16	0	5.25	5.4	0.26	0.23
ENSMUSG00000020437.12	Myo1g	0.56	1.14	0.96	6	4.58	0.92	0.78
ENSMUSG00000034825.13	Nrip3	0.6	0.19	0.51	4.93	5.58	0.47	0.49
ENSMUSG00000004609.11	Cd33	0.41	0.52	0.43	5.36	5.08	0.27	0.39
ENSMUSG00000034528.15	Hsd17b13	0.5	0.57	0.31	4.5	5.87	0.09	0.14
ENSMUSG00000020839.16	Tmigd1	0.42	1	0.77	5.1	5.25	0.66	1.31
ENSMUSG00000043811.5	Rtn4r	1.04	0.92	0.6	5.7	4.61	1.04	0.98
ENSMUSG00000083355.1	Gm11581	0.29	0.8	1.83	5.18	5.1	0.45	0.28
ENSMUSG00000098678.1	Mroh6	0.08	0.14	0.05	5.89	4.37	0.51	0.77
ENSMUSG00000021553.13	Slc28a3	0.19	0.12	0.06	5.05	5.21	0.81	0.59
ENSMUSG00000049744.15	Arhgap15	0.35	0.17	0.3	5.51	4.68	0.95	0.68
ENSMUSG00000061833.5	Gm6311	0	0	0	230.28	218.7	0	0
ENSMUSG00000074199.7	Krtdap	0	0	0	7875.11	6860.76	1197.01	1216.39
ENSMUSG00000034634.7	Ly6d	0	0	0	6356.34	5649.22	1006.87	1000.92
ENSMUSG00000033765.4	Calm4	0	0	0	6145.74	5744.55	486.33	496.87
ENSMUSG00000046676.4	Lce1l	0	0	0	1167.51	1175.02	66.46	63.63
ENSMUSG00000042092.5	Lce1c	0	0	0	1086.33	1105.61	103.9	103.31
ENSMUSG00000068890.8	Lce1a2	0	0	0	780.9	838.97	137.4	140.72
ENSMUSG00000042124.5	Lce1f	0	0	0	673.98	685.81	36.31	31.33
ENSMUSG00000043430.5	Psapl1	0	0	0	692	643.07	93.2	95.54
ENSMUSG00000057609.6	Lce1a1	0	0	0	637.55	586.1	58.54	57.76
ENSMUSG00000068888.3	Lce1i	0	0	0	576.61	631.29	20.18	21.91
ENSMUSG00000071019.11	Sdr16c6	0	0	0	628.36	544.55	26.55	28.9
ENSMUSG00000068889.1	Lce1e	0	0	0	497.4	572.55	20.17	16.32
ENSMUSG00000027919.5	Lce1g	0	0	0	495.28	541.41	8.51	8.23
ENSMUSG00000090314.2	2310050C09Rik	0	0	0	518.27	493.57	51.37	48.46
ENSMUSG00000068887.4	Lce1j	0	0	0	496.04	480.78	10.96	10.89
ENSMUSG00000103243.1	Lce1d	0	0	0	447.34	443.44	16.44	18.22
ENSMUSG00000102439.2	Flg	0	0	0	411.56	432.2	65.87	69.22
ENSMUSG00000027923.3	Lce1b	0	0	0	413.18	420.89	36.92	42.35
ENSMUSG00000099269.2	Calm5	0	0	0	437.27	365.78	25.25	24.93
ENSMUSG00000049593.8	Lce1h	0	0	0	376.61	425.83	7.29	8.68
ENSMUSG00000057262.1	Gm10020	0	0	0.83	378.28	404.85	0	0
ENSMUSG00000020913.3	Krt24	0	0	0	352.32	375.33	1.26	1.53
ENSMUSG00000074280.5	Gm6166	19.09	17.37	15.7	391.76	307.3	0	0
ENSMUSG00000062611.4	Rps3a2	0	2.41	1.63	346.44	334.77	0.1	0.24
ENSMUSG00000015665.8	Awat1	0	0	0	327.88	310.96	5.47	5.65
ENSMUSG00000053054.13	Adh6a	0	0	0	288.19	309.62	4.74	3.76
ENSMUSG00000030792.7	Dkkl1	0	0	0	214.12	209.33	31.62	33.43
ENSMUSG00000081824.5	BC002163	5.75	0	5.75	161.48	177.27	0	0
ENSMUSG00000067001.11	Serpinb7	0	0	0	164.83	161.27	11.56	13.48
ENSMUSG00000059606.3	Rnase2b	0	0	0	146.37	150.95	9.09	11.49
ENSMUSG00000095870.1	Lce1k	0	0	0	125.72	123.22	8	8.1
ENSMUSG00000090356.2	Teddm3	0	0	0	108.39	106.57	20.24	20.11
ENSMUSG00000047889.8	Serpinb6d	0	0	0	103.41	97.37	0.46	0.38
ENSMUSG00000106793.1	AL589742.2	0	0	0	88.17	99.92	0.61	0
ENSMUSG00000090527.2	Gm5538	0	0	0	90.02	84.5	0.19	0.31
ENSMUSG00000032091.14	Tmprss4	0	0	0	89.34	78.85	5.43	5.25
ENSMUSG00000019359.14	Gdpd2	0	0	0	74.12	72.87	2.48	2.25
ENSMUSG00000106857.1	AC107830.1	0	0	0	64.15	82.35	0	0
ENSMUSG00000086848.3	Lce6a	0	0	0	74.76	68.76	7.42	14
ENSMUSG00000058064.5	Gm10036	1.06	0	0.51	70.62	72.85	0	0.06
ENSMUSG00000099009.1	Gm28046	0	0	0	72.83	70.48	6.62	6.45
ENSMUSG00000041991.18	Hrnr	0	0	0	71.62	70.54	1.33	1.36
ENSMUSG00000073602.10	Serpinb3b	0	0	0	68.33	72.08	0.09	0.23
ENSMUSG00000089960.1	Ugt1a1	0	0	0	62.84	73.41	11.21	9.92
ENSMUSG00000048766.6	Skint10	0	0	0	64.11	68.2	10.42	11.14
ENSMUSG00000070609.3	Gm13177	0	0	0	64.3	62.03	0.25	0.24
ENSMUSG00000049972.4	Skint9	0	0	0	58.88	61.15	10.34	8.35
ENSMUSG00000031471.3	Defb8	0	0	0	60.28	50.5	0	0
ENSMUSG00000040154.11	Wfdc5	0	0	0	53.77	52.93	11.1	9.8
ENSMUSG00000091175.2	9130204L05Rik	0	0	0	50.68	48.03	0.43	0.53
ENSMUSG00000030483.14	Cyp2b10	0	0	0	51.08	47.5	6.45	6.59
ENSMUSG00000066878.4	Gm10184	5.35	5.27	3.85	47.55	49.49	0.65	0
ENSMUSG00000036951.2	C130079G13Rik	0	0	0	45.57	46.86	2.41	3.44
ENSMUSG00000018868.3	Pnpla5	0	0	0	44.38	42.16	1.77	1.03
ENSMUSG00000098915.1	Rpl15-ps2	0	0.75	0	42.84	43.17	0	0
ENSMUSG00000078506.1	Gm13124	0	0	0	39.37	45.95	0	0
ENSMUSG00000027869.14	Hsd3b6	0	0	0	42.87	42.22	1.18	1.18
ENSMUSG00000032807.5	Alox12b	0	0	0	41.31	37.41	3.43	3.48
ENSMUSG00000078598.11	Skint5	0	0	0	41.41	36.76	1.5	1.44
ENSMUSG00000024173.10	Tpsab1	5.55	7.31	5.12	39.23	33.03	0.07	0.17
ENSMUSG00000069045.11	Ddx3y	0.03	0	0	30.35	32.19	0	0
ENSMUSG00000026985.1	Il1f8	0	0	0	29.03	32	0.95	1.11
ENSMUSG00000023041.6	Krt6b	0	0	0	32.65	28.21	0	0.07
ENSMUSG00000031844.7	Hsd17b2	0	0	0	29	31.5	5.9	5.24
ENSMUSG00000071561.2	BC100530	0	0	0	27.12	28.81	2.85	3.11
ENSMUSG00000078505.1	Gm436	0	0	0	27.77	25.12	0.25	0.39
ENSMUSG00000089773.7	Skint1	0	0	0	28.35	23.11	4.08	3.09
ENSMUSG00000103335.1	Flg	0	0	0	28.72	22.06	1.08	2.64
ENSMUSG00000042212.3	Sprr2d	0	0	0	21.79	27.32	0.26	0
ENSMUSG00000102724.1	Flg	0	0	0	25.43	21.37	2.37	0.41
ENSMUSG00000092572.7	Serpinb10	0	0	0	18.2	22.49	0.67	0
ENSMUSG00000056880.12	Gadl1	2.51	3.91	3.6	19.6	20.85	0.58	0.36
ENSMUSG00000038242.12	Aox4	0	0	0	19.89	19.47	1.7	1.58
ENSMUSG00000046354.3	Defb14	0	0	0	20.92	16.74	1.17	0
ENSMUSG00000041287.5	Sox15	0	0	0	19.01	17.33	1.06	0.97
ENSMUSG00000082097.1	Gm14039	7.64	0	0	17.69	18.21	0	0
ENSMUSG00000040650.8	Cyp2b23	0	0	0.05	17.31	18.45	0	0
ENSMUSG00000026984.4	Il1f6	0	0	0	16.99	18.5	1.03	0.7
ENSMUSG00000106174.1	Gm43235	0	0	0	16.9	18.19	1.04	0.63
ENSMUSG00000083664.1	Gm11433	0	0	0	15	18.98	0	0
ENSMUSG00000072324.4	Gm8420	0	0	0	16.45	17.48	0	0
ENSMUSG00000048721.2	Fndc9	0	0	0	18.39	15.23	3.35	3.36
ENSMUSG00000095675.1	Ccl21b	0	0	0	20.86	12.34	0	1.69
ENSMUSG00000096596.1	Gm10591	0	0	0	20.86	12.34	0	1.69
ENSMUSG00000098265.1	Gm27517	0	0	0	15.13	17.18	1.48	3.21
ENSMUSG00000081225.3	Cyp2j12	0	0	0	14.51	16.47	0.53	0.36
ENSMUSG00000070465.9	Gm9696	0	0	0	15.37	15.54	0.4	0.15
ENSMUSG00000095427.1	Rps2-ps6	1.1	3.04	1.57	22.21	7.79	0.28	0
ENSMUSG00000076747.3	Tcrg-V5	0	0	0	14.71	15.16	0	0.65
ENSMUSG00000088696.1	Gm22333	2.83	0	0	6.24	22.82	0	0
ENSMUSG00000079025.8	Gsdmc	0	0	0	14.47	14.25	0.24	0.07
ENSMUSG00000091376.1	Aadacl2	0	0	0	15.06	13.12	0.56	0.29
ENSMUSG00000076749.2	Tcrg-C1	0	0	0	12.61	15.4	1.58	1.64
ENSMUSG00000088125.1	Gm26070	0	0	4.26	8.17	19.13	0	0
ENSMUSG00000101059.1	Gm4017	0	0	0	14.07	11.51	0	0
ENSMUSG00000102395.1	Flg	0	0	0	10.71	14.43	0	0.38
ENSMUSG00000106770.1	AC132239.1	0	0	0	11.36	13.73	0	0.72
ENSMUSG00000074433.4	Lce3e	0	0	0	12.21	11.9	0	0
ENSMUSG00000023070.6	Rgn	0	0	0	11.4	12.27	0.14	0.17
ENSMUSG00000092795.2	Gm22690	0	0	0	11.87	11.04	0	0
ENSMUSG00000066583.4	Scgb1b27	0	0	0	12.51	10.33	0	0
ENSMUSG00000096257.1	Gm6537	0	0	0	11.55	11.18	1.91	1.33
ENSMUSG00000102829.1	Flg	0	0	0	12.21	9.9	0	0
ENSMUSG00000085666.3	Gm9855	2.32	1.8	2.27	9.61	12.21	0.09	0
ENSMUSG00000070546.2	Mrgprb3	0	0	0	11.81	9.45	1.66	2.58
ENSMUSG00000068885.4	Lce3f	0	0	0	12.91	8.31	0.2	0.24
ENSMUSG00000042157.2	Sprr2i	0	0	0	10.2	10.47	0.45	0.19
ENSMUSG00000101036.1	Gm28588	0	0	0	10.1	10.03	0	0
ENSMUSG00000098452.1	Gm27501	0	0	0	12.66	7.4	0	0
ENSMUSG00000042540.12	Acot5	0	0	0	10.65	9.41	0.05	0.21
ENSMUSG00000099145.1	Mir8116	0	0	0	9.83	10.06	0	0
ENSMUSG00000108782.1	RP24-549B12.3	0	0	0.39	7.84	11.74	0	0
ENSMUSG00000064921.1	Gm22229	0	0	0	12.73	6.81	0	0
ENSMUSG00000046580.10	Gm7862	0	0	0	10.06	9.02	0	0
ENSMUSG00000009350.13	Mpo	0	0	0	10.45	8.62	0	0
ENSMUSG00000103750.1	Flg	0	0	0	11.62	6.87	0	0
ENSMUSG00000079594.2	BC117090	0	0	0	10.73	7.66	0	0.39
ENSMUSG00000081087.1	Rps15a-ps7	0.5	3.86	0	11.02	7.04	0	0
ENSMUSG00000102734.1	Gm37343	0	0	0	5.73	12.2	0	0
ENSMUSG00000062148.6	Ear6	0	0	0	6	11.77	1.34	0.92
ENSMUSG00000056023.3	Gm9989	0	0	0	9.22	8.36	1.45	0.08
ENSMUSG00000044594.14	Serpinb3a	0	0	0	8.5	9.06	0	0
ENSMUSG00000087194.9	Skint6	0	0	0	9.08	8.45	1.15	1.13
ENSMUSG00000024770.14	Lipn	0	0	0	8.33	8.86	1.18	1.56
ENSMUSG00000079604.9	Gm13219	0	0	0	9.14	7.85	1.18	1.25
ENSMUSG00000046438.5	Scgb2b24	0	0	0	8.41	7.99	0	0
ENSMUSG00000091618.2	H60c	0	0	0	9.17	6.92	1.09	0.91
ENSMUSG00000022938.7	Fam3b	0	0	0	7.61	8.34	1.17	0.49
ENSMUSG00000020405.4	Fabp6	0	0	0	7.78	8.13	0.88	0.55
ENSMUSG00000077192.3	Snora17	0	0	0	12.34	3.56	0	0
ENSMUSG00000025215.10	Tlx1	0	0	0	8.02	7.75	0	0.26
ENSMUSG00000098486.1	Gm27385	0	0	0	7.38	7.78	0	0
ENSMUSG00000079014.4	Serpina3i	0	0	0	6.18	7.91	0.89	1.47
ENSMUSG00000079024.2	Gm21961	1.4	0	0	3.18	10.43	0	0
ENSMUSG00000005917.15	Otx1	0.51	0.22	0.44	7.12	6.44	0	0
ENSMUSG00000020007.3	Il20ra	0	0	0	6.39	6.11	0.51	0.3
ENSMUSG00000103084.1	Gm38119	0	0	0	5.53	6.95	0.23	0
ENSMUSG00000074417.9	Gm14548	0.39	0.41	0.52	6.06	5.15	0.11	0.06
ENSMUSG00000099219.1	Gm27680	0	0	0	4.95	6.18	2.17	0
ENSMUSG00000097304.1	Rpl31-ps15	0	0.98	0	7.71	3.27	0	0
ENSMUSG00000064858.2	Snora43	0	0	0	6.72	4.01	0	0
ENSMUSG00000029503.16	P2rx2	0	0	0	5.76	4.93	0.33	0.29
ENSMUSG00000038357.10	Camp	0	0	0	4.98	5.57	0.34	0.43
ENSMUSG00000094500.2	Smim18	0	0	0	5.1	5.35	0.16	0.2
ENSMUSG00000106501.1	Gm42711	0	0	0	5.62	4.65	0.56	0.39
ENSMUSG00000089429.1	Gm26004	0	0	0	4.86	5.35	0	0
ENSMUSG00000062826.6	Ces2f	0	0	0	5.37	4.74	0.04	0.05

## Sheet: Cartilage-muscle
Gene ID	Gene name	Cartilage/muscle 1	Cartilage/muscle 2	Cartilage/muscle 3	Ear, telogen, 1	Ear telogen, 2	Dorsal, telogen 1	Dorsal telogen 2
ENSMUSG00000089855.1	Gm15662	82027.9	75198.6	82996.1	9812.36	11047.6	9186.08	8715.03
ENSMUSG00000062329.4	Cytl1	47488	45029.8	46478.7	16.84	16.47	3.31	3.42
ENSMUSG00000027447.6	Cst3	16320.6	18220.5	16242.2	1945.78	1777.95	926	948.22
ENSMUSG00000102349.1	Gm37376	15588.4	14383.8	17029.8	2871.29	3282.68	2443.78	2417.53
ENSMUSG00000026879.14	Gsn	8641.73	9983.33	8323.43	1212.15	1148.89	361.95	356.05
ENSMUSG00000001020.8	S100a4	6280.32	7403.08	6151.9	1059.14	828.99	138.12	141.79
ENSMUSG00000007877.2	Tcap	4736.45	5504.78	4543	116.12	99.72	256.29	256.63
ENSMUSG00000031097.14	Tnni2	4286.36	4887.96	4306.05	123.48	109.91	405.76	422.71
ENSMUSG00000021250.13	Fos	3648.3	4254.21	3664.69	23.29	22.98	35.45	36.48
ENSMUSG00000099021.1	Rn7s1	3377.1	3764.11	3256.33	172.46	148.02	351.39	368.03
ENSMUSG00000099250.1	Rn7s2	3377.1	3764.11	3256.33	172.46	148.02	351.39	368.03
ENSMUSG00000099322.1	Gm28017	3267.17	3198.99	3157.17	547.49	512.6	373.85	342.79
ENSMUSG00000018893.14	Mb	2946.29	3325.62	2846	37.76	30.85	34.61	33.54
ENSMUSG00000093404.1	Gm25190	2737.87	2511.66	2445.77	219.1	78.68	66.28	60.49
ENSMUSG00000026728.9	Vim	2218.24	2538.75	2209.61	412.81	380.98	104.87	111.07
ENSMUSG00000030730.12	Atp2a1	2116.55	2236.57	2078.6	122.18	97.21	401.97	398.03
ENSMUSG00000020218.11	Wif1	2084.71	2065.27	2101.76	18.91	20.84	11.1	10.05
ENSMUSG00000039084.8	Chad	1875.83	2144.92	1876.67	3.47	4.26	0.04	0.16
ENSMUSG00000052837.5	Junb	1832.45	2054.23	1901.27	171.83	138.49	181.69	184.16
ENSMUSG00000026697.10	Myoc	1805.26	1917.71	1760.42	15.06	13.87	3.15	4.04
ENSMUSG00000045573.9	Penk	1676.86	1951.75	1695.04	33.38	36.21	18.25	17.07
ENSMUSG00000030218.2	Mgp	1694.43	1858.19	1640.89	86.48	75.55	128.44	118.1
ENSMUSG00000053560.4	Ier2	1460.6	1858.65	1496.94	121.99	108.64	89.3	85.26
ENSMUSG00000022037.14	Clu	1459.35	1645.86	1419.41	105.14	84.07	291.23	286.23
ENSMUSG00000028195.4	Cyr61	1419.79	1564.53	1399.01	14.8	13.62	18.12	19.12
ENSMUSG00000032554.15	Trf	1354.1	1516.94	1321.83	160.27	151.55	133.85	126.16
ENSMUSG00000080600.2	Gm23840	1533.7	996.82	1524.03	200.63	156.23	144.99	48.75
ENSMUSG00000031849.8	Comp	1116.83	1392.29	1056.09	0.91	0.79	0.12	0.22
ENSMUSG00000092974.2	Gm25072	1317.7	973.27	1199.63	109.2	101.05	131.3	127.13
ENSMUSG00000026258.5	3110079O15Rik	1115.31	1264.14	1108.15	2.52	1.67	0.66	0.82
ENSMUSG00000009633.3	G0s2	1099.45	1280.72	1083.94	63.03	54.62	22.35	25.1
ENSMUSG00000044786.5	Zfp36	1073.24	1114.28	1122.53	30.27	29.79	51.76	53.22
ENSMUSG00000020044.13	Timp3	1108.37	1047.96	1112.61	52.33	52.27	63.47	62.89
ENSMUSG00000019997.11	Ctgf	1016.99	1208.82	1013	21.83	17.04	12.42	12.76
ENSMUSG00000095555.2	Gm28010	1317.12	1387.55	459.51	257.1	145.15	107.52	42.88
ENSMUSG00000026335.16	Pam	1009.91	951.06	983.55	93.49	98.93	35.97	34.36
ENSMUSG00000038418.7	Egr1	932.33	965.88	948.38	23.41	23.46	52.84	53.93
ENSMUSG00000026051.8	1500015O10Rik	915.99	1006.78	910.26	14.48	13.09	0.64	1.25
ENSMUSG00000042745.9	Id1	883.74	1044.55	902.88	132.19	115.73	106.24	103.05
ENSMUSG00000006014.16	Prg4	962.56	927.41	904.14	1.11	0.73	0.69	1.12
ENSMUSG00000037852.7	Cpe	904.26	948.72	875.11	110.79	107.06	57.74	60.63
ENSMUSG00000042045.5	Sln	859.03	947.79	836.64	15.16	16.19	43.35	43.97
ENSMUSG00000007872.3	Id3	801.55	915.25	790.12	130.28	121.5	156.87	146.17
ENSMUSG00000023064.4	Sncg	818.47	903.38	781.76	75.38	74.39	54.67	58.83
ENSMUSG00000026421.14	Csrp1	818.31	893.36	786.77	93.54	88.02	78.43	75.92
ENSMUSG00000003541.6	Ier3	794.07	775.26	817.26	41.99	39.51	58.16	51.47
ENSMUSG00000017723.11	Wfdc2	729.64	858.82	720.93	1.19	0.28	0.49	0.37
ENSMUSG00000031375.17	Bgn	741.36	756.07	732.95	131.39	135.19	52.53	54.3
ENSMUSG00000030785.8	Cox6a2	707.69	780.61	728.27	34.77	31.87	89.04	90.81
ENSMUSG00000041559.7	Fmod	718.01	789.37	695.41	26.32	23.08	1.6	1.82
ENSMUSG00000052684.4	Jun	681.55	801.94	681.9	23.38	19.59	32.68	32.87
ENSMUSG00000024190.6	Dusp1	693.73	779.32	665.64	65.68	61.21	23.21	22.64
ENSMUSG00000093363.1	Gm22002	726.35	567.87	822.43	99.3	104.31	68.16	53.81
ENSMUSG00000079010.1	Gm11032	691.6	430.5	833.37	131.67	121.22	111.27	72.46
ENSMUSG00000064179.13	Tnnt1	615.03	653.03	647.3	6.13	6.11	4.52	4.06
ENSMUSG00000089661.9	Mia	603.57	675.43	601.38	1.94	2.41	3.76	3.4
ENSMUSG00000091957.3	Rps2-ps10	597.22	673.68	595.73	75.47	77.67	7.47	11.57
ENSMUSG00000020423.6	Btg2	587.31	603.5	580.5	47.14	45.64	45.03	44.99
ENSMUSG00000030470.14	Csrp3	550.95	640.94	558.06	11.21	12.14	29.23	29.58
ENSMUSG00000029675.12	Eln	535.77	542.56	523.8	24.11	25.5	14.44	13.78
ENSMUSG00000026950.16	Neb	498.35	545.22	485.35	23.5	23.95	86.04	87.03
ENSMUSG00000068196.4	Col8a1	487.38	512.98	493.75	12.05	11.23	0.65	0.65
ENSMUSG00000022665.14	Ccdc80	467.58	519.48	456.82	90	93.72	45.84	44.55
ENSMUSG00000036854.14	Hspb6	468.51	482.59	462.58	23.11	21.54	54.02	50.18
ENSMUSG00000061718.12	Ppp1r1b	439.16	485.43	431.97	0.44	0.24	0.13	0.16
ENSMUSG00000030605.15	Mfge8	428.08	500.24	406.11	84.93	80.02	70.63	73.13
ENSMUSG00000066705.6	Fxyd6	441.78	461.87	427.11	34.19	37.85	16.83	16.81
ENSMUSG00000092905.2	Gm25735	526.27	352.76	435.22	49.55	57.35	21.3	31.69
ENSMUSG00000023886.9	Smoc2	418.54	468.68	392.29	48.21	44.41	17.19	18.14
ENSMUSG00000028989.3	Angptl7	406.54	454.39	385.97	35.87	31.5	1.89	1.71
ENSMUSG00000084349.3	Rpl3-ps1	364.41	446.24	358.56	0.19	0.5	0.47	0
ENSMUSG00000024990.12	Rbp4	370.21	414.62	376.63	33.9	35.42	35.13	33
ENSMUSG00000056328.14	Myh1	374.57	417.9	368.67	11.36	11.07	20.78	20.63
ENSMUSG00000093428.1	Gm26318	363.88	383.75	408.86	43.37	0	28.97	0
ENSMUSG00000049551.2	Fzd9	350.99	435.13	341.72	1.43	1.05	0.4	0.39
ENSMUSG00000023034.6	Nr4a1	352.37	384.91	355.08	5.38	6.5	6.76	6.75
ENSMUSG00000004655.5	Aqp1	353.34	397.2	337.21	48.73	41.17	24.55	27.1
ENSMUSG00000015354.8	Pcolce2	366.8	355.28	357.18	18.06	21.42	5.08	5.19
ENSMUSG00000033208.7	S100b	363.33	352.94	360.37	7.97	8.16	4.07	4.61
ENSMUSG00000029521.7	Chek2	409.47	258.42	407.26	47.41	48.03	58.36	49.7
ENSMUSG00000074218.2	Cox7a1	346	360.84	337.26	34.77	28.35	63.33	59.22
ENSMUSG00000071637.4	Cebpd	307.25	432.77	293.49	61.94	42.18	18.04	20.32
ENSMUSG00000093023.2	Gm27826	356.71	282.86	370.05	38.31	53.07	23.51	26.78
ENSMUSG00000064246.10	Chil1	319.79	370.68	316.68	51.16	47.92	6.37	6.71
ENSMUSG00000055148.7	Klf2	312.37	385.03	295.82	12.47	11.68	7.07	6.03
ENSMUSG00000026628.13	Atf3	301.24	345.19	305.88	2.28	2.11	1.63	2.15
ENSMUSG00000060019.5	Gm10073	298.42	338.88	303.91	14.49	14.03	7.57	6.57
ENSMUSG00000028773.8	Fabp3	271.65	332.18	271.72	13.47	11.83	39.47	37.71
ENSMUSG00000026208.9	Des	279.46	326.35	268.28	11.84	11.01	35.94	32.54
ENSMUSG00000048368.8	Omd	283.93	259.35	300.13	8.97	10.27	2.29	1.79
ENSMUSG00000021622.3	Ckmt2	270.02	310.6	258.97	19.39	17.04	25.39	26.15
ENSMUSG00000035258.14	Abi3bp	274.72	261.49	284.36	13.17	14.04	6.03	6.02
ENSMUSG00000021091.8	Serpina3n	263.5	299.41	255.98	30.07	26.83	7.19	7.59
ENSMUSG00000072553.10	Gm525	275.32	275.48	264.09	0.52	0.17	0.18	0.25
ENSMUSG00000093031.2	Gm22662	267.5	262.52	269.19	3.57	21.47	8.87	4.38
ENSMUSG00000020061.17	Mybpc1	248.9	287.83	248.76	10.79	12.09	12.97	13.2
ENSMUSG00000077990.1	Gm23134	236.62	151.76	395.72	16.07	10.4	33.08	22.1
ENSMUSG00000092903.2	Gm27896	288.88	200.8	275.67	33.97	37.71	40.16	34.38
ENSMUSG00000034463.3	Scara3	232.55	271.8	232.05	18.16	15.26	5.17	5.16
ENSMUSG00000029380.11	Cxcl1	246.87	226.36	262.36	1.44	1.12	0.62	0.88
ENSMUSG00000093203.1	Gm22411	234.18	271.95	220.29	60.27	18.92	55.96	25.28
ENSMUSG00000013936.12	Myl2	241.32	249.35	229.99	1.35	1.31	0	0.17
ENSMUSG00000005583.16	Mef2c	234.43	221.7	264.14	14.55	15.17	15.4	15.71
ENSMUSG00000067786.16	Nnat	226.84	251.54	240.03	25.94	24.18	20.69	23.5
ENSMUSG00000022025.13	Lect1	233.73	257.66	224.6	0.9	1.13	0.99	0.42
ENSMUSG00000001240.13	Ramp2	227.9	262.38	218.54	36.96	39.29	11.56	16.86
ENSMUSG00000041577.5	Prelp	229.55	248.31	225.92	21.21	20.74	8.62	7.91
ENSMUSG00000057604.9	Lmcd1	222.31	270.98	206.46	10.91	8.84	8.11	8.6
ENSMUSG00000052374.14	Actn2	216.17	255.95	206.64	7.86	7.43	15.33	15.72
ENSMUSG00000045672.15	Col27a1	224.85	224.72	223.36	4.33	3.71	0.94	0.79
ENSMUSG00000026249.10	Serpine2	195.88	253.36	195.88	18.42	21.51	10.86	12.06
ENSMUSG00000027570.15	Col9a3	216.72	221.35	196.16	1.36	1.3	1.22	1.38
ENSMUSG00000026489.13	Adck3	215.58	217.76	198.9	23.51	25.16	18.48	17.94
ENSMUSG00000033022.7	Cdo1	203.3	206.3	204.66	9.98	10.02	22.23	21.83
ENSMUSG00000073418.4	C4b	199.55	210.62	197.25	21.66	22.75	27.19	28.94
ENSMUSG00000030607.7	Acan	186.44	215.06	180.65	0.13	0.1	0.2	0.14
ENSMUSG00000053113.3	Socs3	178.67	205.91	181.73	7.59	6.63	6.01	5.87
ENSMUSG00000038170.15	Pde4dip	204.78	158.49	199.3	17.76	16.73	28.29	32.03
ENSMUSG00000028469.15	Npr2	179.68	206.52	176.21	7.44	8.12	2.65	3.56
ENSMUSG00000072941.5	Sod3	176.24	204.06	174.8	22.26	17.79	8.25	7.41
ENSMUSG00000037664.12	Cdkn1c	169.14	200.19	171.42	33.44	28.44	9.59	10.29
ENSMUSG00000018899.16	Irf1	179.03	194.71	166.54	8.94	8.08	5.59	4.93
ENSMUSG00000093345.2	Gm27956	238.96	100.7	181.57	7.4	14.22	8.89	4
ENSMUSG00000020773.11	Trim47	164.11	200.72	153.57	34.07	27.21	7.28	6.77
ENSMUSG00000067653.11	Ankrd23	165.17	191.77	154.98	27.55	24.38	17.18	17.29
ENSMUSG00000030772.5	Dkk3	162.96	183.43	162.36	12.7	12.52	6.81	6.64
ENSMUSG00000093119.1	Gm25640	210.57	147.78	146.84	19.38	17.72	20.87	25.68
ENSMUSG00000017969.13	Ptgis	160.73	177.5	154.99	1.31	1.27	0.34	0.68
ENSMUSG00000098690.1	Gm27316	180.64	132.46	164.45	11.52	17.46	21.22	10.39
ENSMUSG00000030103.11	Bhlhe40	154.55	163.86	152.16	15.66	15.95	13.27	13.03
ENSMUSG00000027004.3	Frzb	153.44	164.63	149	0.95	1.22	0.62	0.72
ENSMUSG00000033065.13	Pfkm	148.72	162.2	144.46	16.26	16.14	28.81	26.09
ENSMUSG00000003545.2	Fosb	148.7	143.43	155.01	1.05	0.84	1.41	1.15
ENSMUSG00000043924.16	Ncmap	139.21	155.73	140.69	29.46	28.54	3.15	3.71
ENSMUSG00000015312.8	Gadd45b	140.18	151.41	138.16	26.31	21.53	18.6	17.2
ENSMUSG00000021390.5	Ogn	145.75	121.32	154.49	17.76	17.8	14.14	14.45
ENSMUSG00000048450.10	Msx1	134.99	147.23	135.47	13.86	12.91	26.68	24.68
ENSMUSG00000022708.16	Zbtb20	124.85	129.25	119.01	18.53	17.72	4.9	5.04
ENSMUSG00000038086.3	Hspb2	114.04	130.49	101.72	12.87	10.68	14.04	16.19
ENSMUSG00000031930.10	Wwp2	112.15	126.42	106.21	14.24	12.47	14.26	13.68
ENSMUSG00000019194.14	Scn1b	104.68	123.48	106.26	14.01	13.64	11.89	10.92
ENSMUSG00000014329.14	Bicc1	106.31	111.38	107.81	11.15	11.11	2.21	2.46
ENSMUSG00000021702.7	Thbs4	106.25	118.15	100.32	2.95	2.82	1.5	1.66
ENSMUSG00000034855.13	Cxcl10	94.39	117.08	100.39	3.4	2.56	5	4
ENSMUSG00000029755.10	Dlx5	95.25	99.28	105.52	11.4	11.88	1.39	1.82
ENSMUSG00000036103.8	Colec12	94.58	103.5	94.75	17.25	16.21	3.47	3.88
ENSMUSG00000044006.8	Cilp2	89.64	110.99	86.84	2.27	1.38	0.32	0.18
ENSMUSG00000022780.5	Mfi2	92.62	104.63	89.28	0.15	0.08	0.08	0.13
ENSMUSG00000041193.15	Pla2g5	92.5	91.45	99.32	10.22	11.1	0.26	0.83
ENSMUSG00000028116.13	Myoz2	84.82	94.86	89.24	1.97	2.3	2.23	2.79
ENSMUSG00000024486.5	Hbegf	91.4	88.41	88.41	6.87	7.44	9.94	11
ENSMUSG00000026586.16	Prrx1	83.84	89.66	93.1	16.05	16.42	6.37	7.47
ENSMUSG00000027077.7	Smtnl1	83.94	93.4	89.2	1.79	2.06	8.24	6.56
ENSMUSG00000048583.16	Igf2	90.66	92.12	81.98	15.26	12.16	4.23	6
ENSMUSG00000062077.14	Trim54	82.17	98.16	83.17	2.66	2.4	4.86	4.92
ENSMUSG00000024987.5	Cyp26a1	84.92	94.43	84.01	0.56	0.5	0.37	0.31
ENSMUSG00000075307.3	Klhl41	90.32	79.36	91.46	4.48	4.43	17.12	16.79
ENSMUSG00000016024.9	Lbp	83.13	92.44	83.94	17.45	14.43	6.48	6.3
ENSMUSG00000030996.7	Art1	86.46	93.34	79.44	4.75	4.42	7.1	8.25
ENSMUSG00000091898.8	Tnnc1	76.34	94.67	87.67	1.3	1.19	0.67	1.26
ENSMUSG00000041556.8	Fbxo2	82.17	89.9	78.71	4.57	4.89	0.65	0.74
ENSMUSG00000007097.14	Atp1a2	81.19	87.33	79.42	8.08	8.44	11.77	11.56
ENSMUSG00000107689.1	RP23-281H4.12	81.63	79.03	85.37	5.74	6.15	6.99	10.63
ENSMUSG00000093059.2	Gm24809	78.97	62.16	103.77	8.23	13.2	1.61	8.61
ENSMUSG00000044055.5	Otos	83.25	86.69	74.55	1.02	1.18	0.13	0.16
ENSMUSG00000056174.8	Col8a2	81	81.52	77.59	2.87	2.35	0.98	0.91
ENSMUSG00000042613.9	Pbxip1	74.33	88.96	76.05	11.86	11.21	14.02	12.22
ENSMUSG00000059741.13	Myl3	69.69	87.36	80.96	1.49	0.79	0.55	0.66
ENSMUSG00000063696.6	Gm8730	79.31	73.74	77.33	0.55	1.4	1.32	0
ENSMUSG00000039103.12	Nexn	79.4	70.86	78.27	4.94	3.65	9.63	9.57
ENSMUSG00000022602.14	Arc	69.52	86.85	70.93	0.59	0.58	0.66	0.86
ENSMUSG00000035112.17	Wnk4	75.27	77.9	66.24	6.27	7.47	9.74	11.65
ENSMUSG00000025172.2	Ankrd2	73.92	78.36	65.88	1.92	1.94	2.21	1.88
ENSMUSG00000039646.5	Vasn	70.46	78.38	66.53	14.25	12.61	14.08	13.81
ENSMUSG00000024381.15	Bin1	69.83	73.46	71.87	10.5	10.91	11.35	10.41
ENSMUSG00000019787.8	Trdn	72.06	61.05	79.9	2.52	3.22	11.81	11.2
ENSMUSG00000021253.6	Tgfb3	70.16	76.01	65.79	9.39	8.55	1.59	1.44
ENSMUSG00000022483.16	Col2a1	68.52	77.09	66.3	0.22	0.21	0.08	0.05
ENSMUSG00000026888.14	Grb14	74.44	70.24	64.98	4.68	4.77	4.81	5.28
ENSMUSG00000041889.7	Shisa4	67.3	75.27	66.95	7.78	8.66	13.55	14.34
ENSMUSG00000031075.17	Ano1	66.14	78.89	63.75	13.23	12.59	1.67	1.76
ENSMUSG00000084497.1	Gm22107	102.03	32.69	73.69	17.31	0	18.72	0
ENSMUSG00000038370.6	Pcp4l1	66.86	69.97	70.35	10.62	11.26	3	2.71
ENSMUSG00000037962.7	Fam101a	65.58	72.86	64.42	2.98	2.38	6.29	6.61
ENSMUSG00000028476.13	Reck	68.64	65.67	67.14	10.41	9.07	2.95	2.96
ENSMUSG00000034312.13	Iqsec1	66.1	64.29	69.86	10.51	10.82	8.46	8.76
ENSMUSG00000049134.15	Nrap	65.43	71.54	62.38	2.41	2.34	5.66	4.98
ENSMUSG00000020216.13	Jsrp1	58.91	71.07	67.39	3.76	2.39	12.3	12.25
ENSMUSG00000006221.7	Hspb7	61.94	70.69	62.66	5.64	5.79	5.53	4.36
ENSMUSG00000068614.7	Actc1	61.02	71.27	62.32	8.31	8.37	7.04	7.26
ENSMUSG00000086596.1	Susd5	65.14	64.62	63.92	0.23	0.13	0.09	0.11
ENSMUSG00000029304.14	Spp1	60.37	68.11	60.55	8.12	7	4.21	4.05
ENSMUSG00000063765.11	Chadl	58.96	71.68	56.88	4.39	4.02	1.11	1.42
ENSMUSG00000022687.11	Boc	61.81	64.27	60.06	6.43	5.52	2.26	2.29
ENSMUSG00000030317.8	Timp4	58.22	64.73	61.69	2.64	1.97	0.35	0.36
ENSMUSG00000020908.14	Myh3	58.79	68.47	56.52	0.12	0.04	0.01	0.01
ENSMUSG00000045799.5	Gm9800	77.46	41.38	63.53	10.54	6.21	0.61	0.96
ENSMUSG00000002500.15	Rpl3l	56.7	65.38	58.07	4.77	4.79	11.66	10.33
ENSMUSG00000071001.4	Hrct1	59.35	62.43	56.49	9.72	10.78	2.52	2.26
ENSMUSG00000027966.19	Col11a1	57.95	52.1	63.87	1.86	2.3	1.58	1.19
ENSMUSG00000025776.13	Crispld1	57.17	60.67	56.06	0.85	0.58	0.7	0.96
ENSMUSG00000045414.7	1190002N15Rik	58.33	55.48	58.58	5.47	5.9	6.35	6.8
ENSMUSG00000014158.11	Trpv4	55.71	62.55	51.44	6.46	4.53	3.69	3.06
ENSMUSG00000092986.2	Gm25574	78.51	33.55	57.52	3.8	9.03	5.67	1.64
ENSMUSG00000026407.17	Cacna1s	47.79	64.37	53.06	2.92	3.25	11.37	10.61
ENSMUSG00000042988.10	Notum	48.61	65.09	48.61	2.71	2.45	3.72	3.82
ENSMUSG00000026147.16	Col9a1	51.5	55.97	53.37	0.43	0.45	0.02	0.06
ENSMUSG00000027488.12	Snta1	48.12	63.13	48.17	10.52	8.91	4.09	5.49
ENSMUSG00000043079.17	Synpo	51.03	55.67	50.02	4.42	4.31	4.43	4.99
ENSMUSG00000041540.16	Sox5	52.71	60.43	43.05	1.1	0.85	2.62	2.24
ENSMUSG00000074971.4	Fibin	51.27	52.49	50.01	2.28	3.12	0.78	1.03
ENSMUSG00000032179.7	Bmp5	52.58	44.93	54.8	0.63	0.61	0	0.02
ENSMUSG00000014198.15	Zfp385c	48.69	51.99	50.52	0.35	0.36	0.45	0.4
ENSMUSG00000024940.10	Ltbp3	45.52	59.82	45.57	5.81	4.39	9.02	8.31
ENSMUSG00000038059.6	Smim3	50.65	48.44	50.04	5.4	6.43	2.98	3.15
ENSMUSG00000008090.14	Fgfrl1	47.62	52.16	42.99	3.94	3.72	4.7	4.04
ENSMUSG00000029499.11	Pxmp2	44.65	46.7	50.38	4.21	4.99	6.57	5.98
ENSMUSG00000037447.16	Arid5a	44.81	48.41	47.19	6.47	7.34	6.46	7.25
ENSMUSG00000027386.9	Fbln7	45.49	50.68	44.12	1.14	1.21	1.8	1.78
ENSMUSG00000001508.15	Sgca	46.18	48.47	45.17	3.71	4.04	5.44	5.36
ENSMUSG00000087075.1	A230065H16Rik	43.15	48.78	47.43	0.38	0.13	0.41	0.17
ENSMUSG00000024330.16	Col11a2	44.37	49.12	45.54	0.48	0.48	0.07	0.12
ENSMUSG00000068335.6	Dok1	40.25	53.56	44.15	5.85	4.41	6.08	6.48
ENSMUSG00000000253.12	Gmpr	44.22	51.86	41.23	5.67	5.4	8.24	8.33
ENSMUSG00000020722.5	Cacng1	41.35	49.68	46.01	4.39	4.55	7.12	6.77
ENSMUSG00000037003.15	Tns2	42.89	49.76	40.54	7.62	7.09	3.06	3.09
ENSMUSG00000031880.6	Rrad	43.55	46.64	42.27	2.53	2.03	0.56	1.36
ENSMUSG00000032911.5	Cspg4	41.48	46.8	40.35	4.47	4.22	5.16	4.73
ENSMUSG00000018566.14	Slc2a4	39.83	47.96	37.62	4.97	4.77	6.77	4.74
ENSMUSG00000000693.10	Loxl3	40.14	46.29	37.7	1.75	1.61	0.7	1.03
ENSMUSG00000035296.13	Sgcg	40.15	45.82	38.13	2.22	2.52	6.97	7.39
ENSMUSG00000023153.9	Tmem52	37.43	47.96	38.56	6.21	4.45	7.36	7.22
ENSMUSG00000025185.14	Loxl4	38	43.75	40.08	3.32	2.6	0.26	0.28
ENSMUSG00000028445.7	Enho	35.62	47.08	38.64	4.88	3.73	4.7	3.85
ENSMUSG00000090122.3	Kcne1l	38.96	47.35	34.97	0.91	0.5	0.77	0.3
ENSMUSG00000035356.16	Nfkbiz	39.05	39.32	38.99	3.16	2.75	1.7	1.81
ENSMUSG00000058571.10	Gpc6	36.56	42.05	37.43	2.93	2.79	1.88	2.15
ENSMUSG00000039462.4	Col10a1	40.64	34.55	38.28	0.03	0.02	0	0.03
ENSMUSG00000100113.1	Gm28592	33.53	50.29	27.19	3.15	0	6.72	3.02
ENSMUSG00000027832.5	Ptx3	34.63	41.95	33.16	1.68	1.92	0.59	0.67
ENSMUSG00000065147.1	Snora31	39.9	40.43	29.32	3.25	3.73	3.92	0
ENSMUSG00000000392.17	Fap	36.19	35.96	37.46	2.89	3.29	3.98	4.49
ENSMUSG00000085604.1	Dhx58os	33.68	36.5	38.44	0.95	0.67	0.14	0.06
ENSMUSG00000021903.11	Galnt15	36.64	37.23	34.42	2.59	2.21	1.2	1.17
ENSMUSG00000031461.4	Myom2	40.06	37.78	30.11	1.83	1.34	6.66	6.28
ENSMUSG00000041153.9	Osgin2	35.67	37.71	34.22	5.79	6.09	3.28	3.73
ENSMUSG00000019467.13	Arhgef25	34.93	36.71	35.93	5.77	6.1	4.18	3.87
ENSMUSG00000018822.7	Sfrp5	32.29	37.73	35.8	4.02	3.43	1.71	1.82
ENSMUSG00000061535.11	C1qtnf7	31.36	38.59	34.52	3.94	3.49	3.26	2.68
ENSMUSG00000028626.5	Col9a2	34.7	37.27	32.24	0.23	0.27	0.05	0.18
ENSMUSG00000025978.14	Rftn2	32.76	36.03	34.55	5.46	4.52	1.16	1.06
ENSMUSG00000016763.14	Scube1	33.58	38.03	31.3	0.23	0.2	0.2	0.3
ENSMUSG00000030087.11	Klf15	36.85	34.26	31.61	3.98	3.41	4.63	3.88
ENSMUSG00000028396.5	2310002L09Rik	32.14	38.72	31.53	2.04	2.77	4.65	5.65
ENSMUSG00000061462.15	Obscn	32.5	39.69	29.83	1.14	0.98	3.11	3.11
ENSMUSG00000038239.10	Hrc	32.67	35.44	33.17	2.44	2.57	6.37	5.87
ENSMUSG00000020793.5	Galr2	31.53	40.12	29.08	0.95	0.94	1.15	1.4
ENSMUSG00000054863.8	Fam19a5	32.71	34.65	30.98	0.64	0.61	2.13	2.06
ENSMUSG00000037621.8	Atoh8	33.59	35.35	28.8	1.94	2.41	3.85	2.81
ENSMUSG00000032064.17	Dixdc1	36.51	30	31.07	2.33	2.71	0.79	0.97
ENSMUSG00000090516.1	Rps11-ps1	26.86	36.62	32.69	5.42	3.65	2.32	2.19
ENSMUSG00000013089.15	Etv5	31.27	32.24	32.05	4.34	3.7	4.48	5.31
ENSMUSG00000027217.13	Tspan18	31.85	34.79	28.77	5.2	4.64	2.58	4.07
ENSMUSG00000027208.14	Fgf7	30.34	33.16	31.67	5.73	4.52	2.51	2.46
ENSMUSG00000085779.1	Atcayos	34.54	25.75	34.39	5.14	4.56	5.74	4.51
ENSMUSG00000029392.12	Rilpl1	28.21	35.05	30.1	3.94	4.35	3.13	2.98
ENSMUSG00000031129.9	Slc9a9	28.59	33.3	30.85	5.63	4.88	2.59	1.8
ENSMUSG00000042895.5	Abra	29.55	33.32	29.13	0.6	0.58	1.66	1.3
ENSMUSG00000029223.12	Uchl1	31.65	34.11	25.86	1.14	1.4	1.72	1.03
ENSMUSG00000074001.2	Klhl40	29.96	33.32	27.49	1.57	1.43	4.37	4.05
ENSMUSG00000037138.16	Aff3	29.27	30.8	29.43	3.66	3.85	2.65	3.03
ENSMUSG00000027544.16	Nfatc2	29.87	30.22	28.42	3.38	3.11	1.51	1.4
ENSMUSG00000039321.1	Uts2r	28.8	33.97	25.1	0.36	0.24	0.04	0
ENSMUSG00000038894.6	Irs2	26.3	34.53	26.25	2.38	2.07	2.82	2.34
ENSMUSG00000086298.1	Gm11716	32.66	26.56	27.04	1.04	2.15	7.73	2.81
ENSMUSG00000015766.14	Eps8	26.7	31.88	26.78	5.9	4.7	3.84	5.9
ENSMUSG00000029829.4	Tmem213	29.21	26.54	27.72	0	0.41	0.15	0
ENSMUSG00000055072.2	Gm9964	36.28	8.83	38.01	1.89	2.55	1.38	1.25
ENSMUSG00000031990.14	Jam3	26.45	28.73	27.77	4.94	5.08	1.68	2.03
ENSMUSG00000033576.11	Apol6	26.67	30.26	24.55	3.49	3.36	2.97	3.79
ENSMUSG00000044086.8	Lmod3	25.76	26.36	27.5	0.99	1.39	5.08	5.46
ENSMUSG00000022469.16	Rapgef3	23.94	30.2	25.25	4.48	4.26	2.07	1.5
ENSMUSG00000025453.16	Nnt	26.96	25.16	26.76	5.27	5.07	2.53	2.73
ENSMUSG00000029638.17	Glcci1	32.7	20.3	25.81	2.26	2.49	2.98	4.97
ENSMUSG00000097995.1	Gm24362	28.72	25.2	24.47	2.82	3.36	1.29	4.55
ENSMUSG00000032355.16	Mlip	21.51	26.8	28.82	4.34	3.73	5.25	4.52
ENSMUSG00000037112.16	Sik2	25.35	25.14	26.45	4.36	4.6	2.57	2.89
ENSMUSG00000024049.14	Myom1	24.63	26.93	25.32	1.42	1.47	4.41	4.48
ENSMUSG00000037139.15	Myom3	25.06	26.37	25.09	2.35	1.79	1.35	1.91
ENSMUSG00000087090.7	Nctc1	25.53	26.03	24.27	1.26	1.33	2.35	2.52
ENSMUSG00000020303.2	Stc2	24.04	26.72	24.25	2.61	2.7	0.78	0.68
ENSMUSG00000028036.6	Ptgfr	25.07	27.9	21.68	4.48	4.16	1.16	1.34
ENSMUSG00000061013.5	Mkx	20.76	32.24	21.24	1.19	1.49	0.62	0.68
ENSMUSG00000020900.15	Myh10	23.51	24.95	25.53	2.67	2.99	3.27	3.96
ENSMUSG00000078247.3	Airn	24.93	25.69	21.69	3.63	3.67	3.7	3.86
ENSMUSG00000026729.9	4930562F07Rik	24.43	22.42	25.22	1.22	0.7	4.5	3.51
ENSMUSG00000020695.14	Mrc2	23.32	25.05	22.65	4.62	4.12	1.95	1.29
ENSMUSG00000048616.4	Nog	23.52	24.23	23.21	2.51	1.66	0.69	0.65
ENSMUSG00000030657.11	Xylt1	23.97	22.45	24.11	0.88	0.7	0.45	0.59
ENSMUSG00000029123.8	Stk32b	23.95	23.93	20.95	0.23	0.19	0	0.03
ENSMUSG00000028167.15	Bdh2	22.62	24.41	21.3	3.32	3.38	2.97	2.17
ENSMUSG00000101122.1	Gm17971	20.07	26.27	21.8	2.6	2.12	1.54	1.25
ENSMUSG00000056900.13	Usp13	21.9	25.47	20.25	1.34	1.44	2.17	3.8
ENSMUSG00000032246.13	Calml4	22.23	24.84	20.51	3.43	4.2	3.38	3.17
ENSMUSG00000031802.8	Phxr4	22.12	21.9	22.87	2.5	2.73	1.97	3.03
ENSMUSG00000040138.7	Ndp	20.57	23.44	21.99	0.95	0.94	0.22	0.28
ENSMUSG00000039959.12	Hip1	21.29	19.65	24.76	3.37	3.2	2.4	2.4
ENSMUSG00000027022.13	Xirp2	21.96	20.85	21.89	0.55	0.65	2.85	2.54
ENSMUSG00000050071.8	Bex1	21.09	22.51	20.1	3.22	2.41	3.58	4.19
ENSMUSG00000087400.8	Gm15270	21.43	20.87	21.29	1.11	0.78	0.7	0.68
ENSMUSG00000028949.13	Smarcd3	20.34	23.31	19.8	3.42	3.92	2.71	2.88
ENSMUSG00000087149.8	Itih5l-ps	21.19	23.67	17.72	0.04	0.64	0.02	0.13
ENSMUSG00000031778.12	Cx3cl1	20.79	20.87	20.05	4	4.17	2.32	2.05
ENSMUSG00000057777.4	Mab21l2	20.75	21.25	18.73	0.13	0.17	0.11	0.1
ENSMUSG00000024186.15	Rgs11	16.62	20.83	23	4.17	3.46	0.49	0.36
ENSMUSG00000105245.1	Gm43076	20.26	17.78	22.28	0.61	0.47	0.62	0.31
ENSMUSG00000070867.4	Trabd2b	19.37	20.62	20.14	2.32	2.23	1.94	2.05
ENSMUSG00000024803.8	Ankrd1	19.75	19.78	20.01	0.22	0.15	0.12	0.16
ENSMUSG00000054034.10	Tceal5	20.41	18.61	20.14	0.65	0.61	2.03	1.08
ENSMUSG00000038195.6	Rilp	19.33	20.23	18.84	2.8	3.22	0.96	1.27
ENSMUSG00000034161.7	Scx	17.17	24.08	17	0.69	1.16	1.85	2.5
ENSMUSG00000029754.13	Dlx6	18.11	19.99	19.71	0.13	0.26	0.24	0.12
ENSMUSG00000078937.8	Cpt1b	17.65	22.3	17.47	1.59	2.01	3.43	3.47
ENSMUSG00000043969.4	Emx2	18.65	18.15	20.54	2.18	3.52	0.8	0.29
ENSMUSG00000037411.10	Serpine1	17.81	18.99	20.27	0.52	0.85	0.06	0.13
ENSMUSG00000055421.8	Pcdh9	19.78	19.72	17.5	0.83	1.09	0.37	0.26
ENSMUSG00000026012.2	Cd28	18.19	18.73	19.37	0.43	0.56	0.13	0.12
ENSMUSG00000091191.1	Gm17334	16.43	22.61	16.41	0.39	0.34	0.09	0
ENSMUSG00000026826.13	Nr4a2	18.43	16.87	20.09	1.9	2.11	0.53	0.6
ENSMUSG00000108693.1	RP23-174K7.2	17.65	20.65	16.75	0.71	0.54	0.23	0.19
ENSMUSG00000031626.16	Sorbs2	17.34	17.81	19.52	3.26	2.68	1.72	1.71
ENSMUSG00000039474.13	Wfs1	17.16	19.64	17.81	2.87	2.4	2.55	2.77
ENSMUSG00000037406.6	Htra4	15.85	22.01	16.16	0.3	0.04	0.18	0.25
ENSMUSG00000063142.13	Kcnma1	16.76	19.49	17.77	0.35	0.18	0.31	0.16
ENSMUSG00000054855.13	Rnd1	17.55	18.38	17.84	0.89	1.25	1.58	0.95
ENSMUSG00000070424.11	Art5	16.92	20.15	16.44	1.05	0.92	1.88	1.97
ENSMUSG00000049641.12	Vgll2	16.3	20.54	16.55	0.79	0.93	0.45	0.75
ENSMUSG00000028023.16	Pitx2	17.72	18.14	17.38	0.42	0.45	1.08	1.06
ENSMUSG00000032177.16	Pde4a	15.95	20.45	16.3	2.76	2.92	0.85	0.77
ENSMUSG00000039542.15	Ncam1	14.38	27.39	10.73	3.14	3.72	2.15	2.39
ENSMUSG00000006576.16	Slc4a3	16.17	19.83	16.14	1.59	1.02	0.83	0.99
ENSMUSG00000043795.8	Prr33	18.24	19.03	14.79	1.42	0.65	3.77	2.11
ENSMUSG00000020836.15	Coro6	16.37	19.86	15.79	1.27	1.17	2.9	2.81
ENSMUSG00000035237.7	Lcat	16.04	20.65	15.29	0.68	0.95	0.11	0.21
ENSMUSG00000034653.11	Ythdc2	21.15	11.74	19.01	3.82	2.9	3.36	1.83
ENSMUSG00000025255.18	Zfhx4	15.39	16.42	19.3	0.91	0.85	0.51	0.57
ENSMUSG00000097324.8	Mir143hg	19.14	15.3	16.33	2.65	3.08	0.85	0.55
ENSMUSG00000042766.17	Trim46	15.31	19.07	15.91	0.47	0.35	0.27	0.32
ENSMUSG00000039410.16	Prdm16	14.53	19.55	15.55	2.64	2.84	1.68	0.67
ENSMUSG00000025478.15	Dpysl4	15.36	18.86	15.39	0.51	0.37	0.21	0.36
ENSMUSG00000031448.12	Adprhl1	15.31	19.69	14.61	0.84	1.09	1.11	1.45
ENSMUSG00000016128.14	Stard13	17.02	17.9	14.65	2.84	2.06	0.5	0.61
ENSMUSG00000030592.16	Ryr1	16.46	17.6	15.27	0.59	0.57	2.45	2.62
ENSMUSG00000021613.8	Hapln1	17.79	13.18	18.22	0.15	0.05	0.01	0.03
ENSMUSG00000039376.13	Synpo2l	15.77	17.34	15.67	0.36	0.47	1.43	1.2
ENSMUSG00000051456.4	Hspb3	15.6	17.87	14.65	1.36	1.85	2.63	2.19
ENSMUSG00000006675.10	P4htm	14.88	18.85	14.2	2.89	2.17	0.95	0.45
ENSMUSG00000021838.16	Samd4	15.74	16.15	15.97	1.98	2.08	2.21	2.65
ENSMUSG00000047419.5	Cmya5	15.88	15.93	15.14	0.72	0.65	1.85	2.08
ENSMUSG00000040543.16	Pitpnm3	15.91	15.87	14.56	0.8	0.81	0.19	0.27
ENSMUSG00000061740.7	Cyp2d22	15.03	16.66	14.64	1.66	1.33	1.24	0.7
ENSMUSG00000051736.8	Fam229b	13.78	15.38	16.17	2.16	3.65	1.81	2.88
ENSMUSG00000070469.11	Adamtsl3	15.49	13.16	16.67	0.92	1	0.48	0.15
ENSMUSG00000004035.12	Gstm7	17.12	15.42	12.78	1.47	0.98	2.91	2.51
ENSMUSG00000024076.9	Vit	14.46	16.6	14.23	2.21	2.05	1	0.52
ENSMUSG00000032507.15	Fbxl2	14.79	15.62	14.85	1.92	1.99	0.46	0.63
ENSMUSG00000014609.16	Chrne	13.84	18.45	12.94	0.8	1.09	0.48	0.41
ENSMUSG00000041696.13	Rasl12	15.06	15.88	14.25	3.48	2.23	0.98	0.81
ENSMUSG00000078489.2	Gm17106	18.23	6.44	20.07	2.24	3.5	1.6	0.41
ENSMUSG00000097906.1	Gm9625	14.48	20.43	9.09	0.55	0.6	0.12	0
ENSMUSG00000039601.15	Rcan2	15.82	15.66	12.27	1.28	1.29	0.51	0.62
ENSMUSG00000037225.13	Fgf2	13.65	15.41	14.09	1.04	0.91	0.68	0.89
ENSMUSG00000030623.3	Prss23os	6.46	26.44	10.24	0.83	0.15	0	0.23
ENSMUSG00000039891.6	Txlnb	13.96	12.85	15.79	0.62	0.54	2.33	1.79
ENSMUSG00000018845.14	Unc45b	12.3	17.75	12.01	2.17	2.58	2.28	2.44
ENSMUSG00000090439.1	Gm17455	12.51	17.8	11.44	1.82	1.37	0.88	1.58
ENSMUSG00000029757.16	Dync1i1	14.65	13.28	13.27	0.2	0.44	0.37	0.57
ENSMUSG00000029417.9	Cxcl9	14.62	11.44	15.02	0.56	0.72	0.87	1.45
ENSMUSG00000038740.9	Mvb12b	15.03	12.57	13.47	2.62	2	1.4	1.72
ENSMUSG00000028019.9	Pdgfc	13.15	12.7	14.98	2.77	2.61	0.55	0.56
ENSMUSG00000031963.7	Bmper	13.16	14.52	13.08	2.28	2.09	1.97	1.94
ENSMUSG00000033763.14	Mtss1l	14.03	13.64	13.03	1.55	1.3	1.73	2.04
ENSMUSG00000072720.9	Myo18b	12.31	13.96	14.17	0.51	0.5	2.14	2.05
ENSMUSG00000032855.5	Pkd1	13.28	14.38	12.36	2.57	2.05	0.72	0.68
ENSMUSG00000040732.18	Erg	12.62	14.25	12.88	1.47	0.81	0.34	0.6
ENSMUSG00000035184.15	Fam124a	11.44	12.96	14.47	2.24	2.06	0.65	0.72
ENSMUSG00000057329.7	Bcl2	12.37	12.91	13.43	2.49	2.27	1.69	1.69
ENSMUSG00000013921.14	Clip3	12.81	12.2	12.9	1.76	1.79	1.09	0.98
ENSMUSG00000027684.16	Mecom	14.04	12	11.66	1.11	0.62	0.5	0.41
ENSMUSG00000027895.9	Kcnc4	12.78	12.94	11.42	1.08	0.72	0.23	0.28
ENSMUSG00000041592.16	Sdk2	10.87	13.51	12.08	0.5	0.78	0.29	0.31
ENSMUSG00000094338.1	Hist1h2bl	12.31	8.49	15.66	0.66	0	0.51	1.64
ENSMUSG00000026304.13	Rab17	10.36	14.51	11.13	0.33	0.5	0.53	1.03
ENSMUSG00000040260.7	Daam2	11.84	12.26	11.4	1.39	1.41	0.47	0.28
ENSMUSG00000073375.2	Lrrc30	11.73	12.68	10.74	0.26	0.27	0.66	0.42
ENSMUSG00000002104.11	Rapsn	10.37	14.7	10.05	2.44	2.22	1.85	1.67
ENSMUSG00000086707.1	Gm12088	16.06	5.39	13.64	0.32	0.68	0.7	0
ENSMUSG00000104030.1	5330406M23Rik	11.92	11.24	11.8	2.35	2.08	0.92	0.47
ENSMUSG00000045333.15	Zfp423	9.98	15.25	9.55	1.39	1.16	0.39	0.54
ENSMUSG00000057897.14	Camk2b	11.98	11.68	10.94	1.75	1.56	1.46	1.06
ENSMUSG00000021719.8	Rgs7bp	11.62	11.18	11.47	1.2	1.02	0.41	0.31
ENSMUSG00000024176.10	Sox8	12.02	11.58	10.56	0.83	0.55	0.07	0.23
ENSMUSG00000021373.15	Cap2	11.06	11.68	11.39	0.91	0.7	2.19	2.25
ENSMUSG00000004939.6	Nmrk2	11.27	12.62	10.03	0.57	0.64	1.99	2.35
ENSMUSG00000068699.12	Flnc	10.75	12.46	10.7	0.67	0.55	1.56	1.55
ENSMUSG00000089762.3	Ier5l	10.46	12.55	10.88	1	1.03	1.44	1.45
ENSMUSG00000048967.15	Yjefn3	8.97	14.18	10.73	2.53	0.93	1.61	1.23
ENSMUSG00000095224.1	F930015N05Rik	11.19	12.99	9.64	0.14	0.24	0	0.08
ENSMUSG00000038119.14	Cdon	11.26	10.71	11.61	1.94	2.03	0.77	0.9
ENSMUSG00000072662.2	Mansc4	9.61	14.02	9.79	1.49	1.3	0	0.17
ENSMUSG00000039661.14	Dusp26	10.41	13.61	9.32	1.73	1.72	1.48	2.14
ENSMUSG00000090387.1	Gm17056	12.04	11.02	10.25	0.37	0.32	0.19	0.12
ENSMUSG00000103593.1	Gm37352	10.32	12.49	10.33	1.6	0.77	0.52	0.37
ENSMUSG00000005373.13	Mlxipl	12.59	10.47	9.97	1.04	1.14	1.01	1.42
ENSMUSG00000032714.6	Syde1	10.95	11.05	10.91	2.14	2.11	1.62	1.43
ENSMUSG00000041189.9	Chrnb1	9.79	13.18	9.86	1.34	1.34	1.62	1.72
ENSMUSG00000024544.8	Ldlrad4	10.36	12.41	10.05	2.05	2.25	0.99	1.35
ENSMUSG00000090210.7	Itga10	10.52	11.22	10.92	0.2	0.1	0.18	0.12
ENSMUSG00000104140.1	Gm37140	12.92	8.24	11.47	1.09	0.9	0.13	0
ENSMUSG00000058427.10	Cxcl2	12.76	8.65	10.93	0.59	0.35	0.07	0
ENSMUSG00000081429.1	Rps27-ps1	4.88	18.64	8.32	1.63	1.47	0	0.94
ENSMUSG00000037053.6	Azgp1	9.82	11.2	10.47	0.18	0.06	0	0.19
ENSMUSG00000030102.10	Itpr1	9	11.08	11.11	1.07	0.83	0.86	0.64
ENSMUSG00000016386.15	Mpped2	11.11	10.68	9.16	1.01	1.15	0.98	0.89
ENSMUSG00000078308.1	Gm7293	10.84	10.46	9.56	0.05	0.1	0.05	0.08
ENSMUSG00000033768.16	Nrxn2	9.72	11.34	9.79	1.8	2.28	0.83	1.05
ENSMUSG00000025746.11	Il6	10.95	8.87	10.66	0.32	0.21	0.14	0.39
ENSMUSG00000051177.16	Plcb1	9.84	11.47	9.13	1.37	2.13	1.03	1.16
ENSMUSG00000003476.15	Crhr2	9.72	10.27	10.36	0.74	0.49	0.67	0.79
ENSMUSG00000011008.13	Mcoln2	10.07	10.62	9.37	1.76	1.34	0.96	0.28
ENSMUSG00000020333.17	Acsl6	10.46	10.73	8.4	0.53	0.46	0.19	0.24
ENSMUSG00000053093.15	Myh7	9.38	10.6	9.05	0.11	0.07	0.05	0
ENSMUSG00000075514.4	Gm13375	8.19	11.66	9.17	1.72	1.01	0.78	0.37
ENSMUSG00000034898.15	Filip1	9.36	8.51	10.7	1.75	1.08	0.48	0.77
ENSMUSG00000024589.15	Nedd4l	9.45	9.43	9.52	1.43	1.44	1.01	0.95
ENSMUSG00000081562.1	Gm11575	6.29	11.23	10.84	0.79	1.2	0	1.5
ENSMUSG00000024302.15	Dtna	8.84	9.87	9.64	0.95	0.53	1.32	1.53
ENSMUSG00000103220.1	Gm37728	9.15	9.54	9.47	0.92	1.22	0.37	0.47
ENSMUSG00000075289.4	Carns1	8.81	10.18	9.13	1.58	1.1	0.69	0.85
ENSMUSG00000047759.6	Hs3st3a1	9.18	10.2	8.72	0.32	0.38	0.12	0.17
ENSMUSG00000058975.6	Kcnc1	9.89	9.29	7.73	0.47	0.21	0.19	0.03
ENSMUSG00000046714.7	Foxc2	8.14	9.94	8.75	0.79	0.65	1.36	1.55
ENSMUSG00000004267.16	Eno2	9.34	8.77	8.5	1.97	1.27	0.57	0.8
ENSMUSG00000042359.18	Osbpl6	8.15	8.43	9.92	0.67	1.18	0.31	0.24
ENSMUSG00000032649.14	Colgalt2	8.61	9.37	8.43	0.38	0.16	0.13	0.11
ENSMUSG00000055632.17	Hmcn2	8.19	10.14	8.06	1.77	1.43	1.41	1.25
ENSMUSG00000038594.8	Cep85l	8.45	9.44	8.07	1.35	1.64	0.65	1.02
ENSMUSG00000104475.1	D630036G22Rik	7.71	9.15	8.89	0.65	0.42	0.22	0.24
ENSMUSG00000071342.4	Lsmem1	8.66	9.28	7.81	0.57	0.24	1.14	1.12
ENSMUSG00000059027.14	9630013D21Rik	9.55	6.99	8.79	0.9	2.21	0.66	0.17
ENSMUSG00000070720.3	Tmem200b	8.32	8.13	8.87	1.07	1.45	0.33	0.14
ENSMUSG00000076435.3	Acsf2	9.43	8.04	7.83	0.83	0.74	1.23	1.3
ENSMUSG00000097633.1	Gm16617	9.31	5.95	10	1.09	1.66	0.37	0.46
ENSMUSG00000001334.9	Fndc5	8.57	9	7.66	0.79	0.59	1.24	1.31
ENSMUSG00000074934.3	Grem1	8.63	7.68	8.91	0.45	0.31	1.46	1.33
ENSMUSG00000086864.1	A630077J23Rik	7.7	8.17	9.15	0.05	0	0.09	0
ENSMUSG00000058297.16	Spock2	7.85	8.87	8.13	0.73	0.93	0.23	0.28
ENSMUSG00000038508.7	Gdf15	8.18	8.81	7.44	0.92	0.67	0.22	0.14
ENSMUSG00000026207.16	Speg	6.41	10.13	7.52	1.31	1.44	1.44	1.76
ENSMUSG00000042190.12	Cmklr1	6.33	8.55	8.69	0.61	0.63	0.73	0.98
ENSMUSG00000030606.8	Hapln3	6.19	8.75	8.55	1.26	1.54	0.37	0.37
ENSMUSG00000022803.12	Popdc2	7.12	9.34	6.89	0.69	0.46	1.52	0.91
ENSMUSG00000002228.7	Ppm1j	5.71	10.02	6.71	1.02	0.84	0.98	1.64
ENSMUSG00000055775.16	Myh8	7.06	8.66	6.57	0.17	0.25	0.28	0.15
ENSMUSG00000038204.13	Asb10	6.91	7.76	7.46	0.5	0.47	0.99	0.87
ENSMUSG00000026839.16	Upp2	8.33	6.82	6.82	1.69	0.97	0.69	2.12
ENSMUSG00000026679.3	Enkur	7.02	6.77	8.11	0.48	0.79	0.13	0
ENSMUSG00000031561.15	Tenm3	7	7.97	6.92	1.41	1.49	0.27	0.25
ENSMUSG00000031066.10	Usp11	7.58	7.43	6.82	1.05	0.91	0.95	1.08
ENSMUSG00000041020.14	Map7d2	6.86	8.17	6.79	0.24	0.22	0.11	0.27
ENSMUSG00000051367.8	Six1	6.51	8.2	6.4	0.48	0.5	0.94	1.22
ENSMUSG00000019464.5	Ptger1	6.25	8.28	6.46	1.27	0.99	0.48	0.45
ENSMUSG00000071317.3	Bves	6.93	9.32	4.7	0.62	0.17	1.24	1.15
ENSMUSG00000105731.1	Gm43063	7.48	5.42	8	0.89	1.42	0.44	0.2
ENSMUSG00000071540.3	3425401B19Rik	7.35	5.96	7.54	0.29	0.25	0.93	0.6
ENSMUSG00000079243.2	Xirp1	6.55	7.7	6.36	0.21	0.25	0.69	0.71
ENSMUSG00000028458.12	Tesk1	5.48	7.77	7.21	1.05	1.18	0.75	0.9
ENSMUSG00000102158.1	Gm34342	8.42	9.52	2.47	1.26	0.78	0.82	0
ENSMUSG00000015451.16	C4a	6.29	6.45	7.42	1.49	1.11	0.99	0.53
ENSMUSG00000003665.6	Has1	6.3	7.59	6.16	0.53	0.39	0.38	0.47
ENSMUSG00000047746.14	Fbxo40	7.36	6.38	6.29	0.33	0.28	0.76	0.86
ENSMUSG00000087265.1	Gm12349	7.57	6.35	6.11	0.68	0.78	0.97	1.55
ENSMUSG00000047230.6	Cldn2	6.08	7.09	6.64	0.05	0	0.07	0.06
ENSMUSG00000033350.7	Chst2	5.98	7.55	6.2	0.91	1.01	0.49	0.45
ENSMUSG00000049526.7	Tmem202	6.04	5.98	7.69	0.93	0.8	0.49	0.38
ENSMUSG00000038132.5	Rbm24	6.66	5.3	7.71	0.75	0.71	1.23	1.17
ENSMUSG00000003279.16	Dlgap1	6.06	7.54	6.03	0.66	0.53	0.21	0.2
ENSMUSG00000057280.15	Musk	5.82	7.86	5.87	0.42	0.56	0.31	0.31
ENSMUSG00000047181.12	Samd14	6.76	7.04	5.74	1.13	1.08	1.25	1.16
ENSMUSG00000041688.16	Amot	6.45	6.2	6.88	0.43	0.34	1	0.79
ENSMUSG00000063430.9	Wscd2	5.9	7.62	5.98	0.84	0.99	0.59	0.36
ENSMUSG00000083365.1	Gm12895	5.66	6	7.43	0.64	0.88	1.39	0.56
ENSMUSG00000083558.1	Gm12896	5.66	6	7.43	0.64	0.88	1.39	0.56
ENSMUSG00000063821.5	Dupd1	6.21	8.43	4.32	0.61	0.2	1.01	0.81
ENSMUSG00000024033.9	Rsph1	6.43	7.18	5.28	0.81	1.31	0.4	0.92
ENSMUSG00000063297.7	Luzp2	5.87	6.62	6.33	0.13	0.08	0.04	0.05
ENSMUSG00000044716.12	Dok7	6.26	6.58	5.96	0.44	0.38	0.14	0.15
ENSMUSG00000096537.5	1190003K10Rik	6.82	4.61	7.03	0.04	0	0	0.09
ENSMUSG00000044217.16	Aqp5	7.17	6.04	5.14	0.77	0.67	1.05	0.42
ENSMUSG00000089782.1	Gm3531	3.46	9.86	5.01	0.39	0.88	0.01	0.08
ENSMUSG00000034612.7	Chst11	6.02	6.51	5.71	0.57	0.62	0.51	0.46
ENSMUSG00000059921.15	Unc5c	7.86	5.18	5.11	0.04	0.07	0.05	0.07
ENSMUSG00000033249.10	Hsf4	6.28	6.7	5.17	0.45	0.35	1.15	1.01
ENSMUSG00000041482.16	Piezo2	5.67	6.05	6.05	0.72	0.57	0.49	0.43
ENSMUSG00000026459.5	Myog	6.32	5.86	5.54	0.34	0.37	0.7	0.63
ENSMUSG00000028927.6	Padi2	6.04	5.85	5.65	0.83	0.58	1.04	1.01
ENSMUSG00000023011.7	Faim2	5.76	5.93	5.78	0.17	0.13	0.59	0.88
ENSMUSG00000027961.7	Lrrc39	5.87	5.21	6.32	0.49	0.61	0.87	1.28
ENSMUSG00000091002.2	Tcerg1l	6.92	5.45	4.99	0.03	0.05	0	0.03
ENSMUSG00000031618.13	Nr3c2	6.37	5.39	5.33	1.31	0.6	0.18	0.25
ENSMUSG00000104917.1	Gm43289	5.46	5.96	5.6	0.4	0.52	0.61	0.19
ENSMUSG00000085078.1	C030013C21Rik	5.04	5.3	6.6	0.29	0.7	0.86	0.8
ENSMUSG00000086256.1	Gm12052	5.77	5.07	6.02	0.56	0.74	0.09	0
ENSMUSG00000072476.6	Gm9008	5.2	6.45	5.18	0.09	0.06	0.06	0.16
ENSMUSG00000087308.1	Gm16195	5.49	2.66	8.64	0.22	0.16	0.77	0.22
ENSMUSG00000072612.2	Gm10382	5.3	5.41	6.03	0.26	0.35	0.12	0.16
ENSMUSG00000107559.1	RP23-56N1.3	6.05	5.47	5.14	0.03	0.08	0.06	0
ENSMUSG00000079055.10	Slc8a3	4.63	6.57	5.29	0.16	0.12	0.1	0.12
ENSMUSG00000038077.7	Kcna6	5.04	6.02	5.36	1	1.09	0.58	0.48
ENSMUSG00000069171.13	Nr2f1	5.42	5.43	5.53	1.1	0.83	0.13	0.51
ENSMUSG00000042476.12	Abcb4	5.4	5.74	5.23	0.42	0.75	0.27	0.26
ENSMUSG00000026564.9	Dusp27	5.39	5.72	5.22	0.18	0.21	0.46	0.67
ENSMUSG00000055493.4	Epm2a	4.48	6.53	5.29	0.99	1.11	0.29	0.37
ENSMUSG00000090397.1	Gm17096	5.15	7.66	3.33	0.97	1.12	1.07	0.3
ENSMUSG00000100335.1	2310008N11Rik	4.56	4.22	7.29	0.28	0.48	0.85	1.06
ENSMUSG00000072966.11	Gprasp2	4.4	6.28	5.28	0.93	0.27	0.87	0.41
ENSMUSG00000037813.13	D630003M21Rik	5.05	5.89	4.98	0.78	0.69	0.21	0.11
ENSMUSG00000029862.15	Clcn1	5.09	5.75	5	0.51	0.46	1	0.62
ENSMUSG00000002688.7	Prkd1	5.75	5.14	4.94	0.84	0.58	0.31	0.32
ENSMUSG00000003051.13	Elf3	4.02	6.73	5.05	0.28	0.19	1.03	0.63
ENSMUSG00000093093.2	Gm22642	2.88	6.7	6.11	1.16	0.64	0	0.85
ENSMUSG00000084910.1	C630043F03Rik	4.76	5.21	5.65	0.51	0.87	0.38	0.55
ENSMUSG00000031298.15	Adgrg2	4.91	5.02	5.61	0.9	0.89	0.86	0.86
ENSMUSG00000100176.1	Gm28586	4.04	5.56	5.91	0.19	0.36	0.4	0
ENSMUSG00000024998.17	Plce1	4.97	4.97	5.51	0.57	0.85	0.35	0.71
ENSMUSG00000041734.15	Kirrel	4.31	6.19	4.85	0.67	0.41	0.93	0.83
ENSMUSG00000083538.1	Gm16016	5.47	5.34	4.22	0.6	0.5	0.71	0
ENSMUSG00000083773.4	Gm13394	896.38	1126.22	874.3	1.33	0	0	0
ENSMUSG00000078719.2	Msmp	632.73	720.16	652	0.67	0.63	0	0
ENSMUSG00000097554.1	Gm26825	309.36	335.55	310.76	0.28	0	0	0
ENSMUSG00000026668.10	Ucma	208.5	225.22	214.51	0.26	0.57	0	0
ENSMUSG00000023013.4	Aqp2	117.88	133.33	114.21	0.44	0.2	0	0
ENSMUSG00000073291.3	Gm10491	76.54	111.9	112.25	10.53	8.18	0	0
ENSMUSG00000094344.1	Gm11942	75.65	101.12	94	0	0	1.43	0
ENSMUSG00000038259.4	Gdf5	74.34	85.07	69.93	0.43	0.46	0	0
ENSMUSG00000093040.1	Gm26141	65	57	96.69	8.72	0	0	0
ENSMUSG00000008874.3	Clec3a	54.3	67.96	52.61	0	0	0	0
ENSMUSG00000066553.5	Gm6969	43.2	63.12	59.6	1.1	0	0	0
ENSMUSG00000043747.12	1520401A03Rik	51.58	58.99	51.6	1.87	1.19	0	0
ENSMUSG00000079941.1	Gm11273	34.51	48.43	37.46	0	0	3.05	3.13
ENSMUSG00000060424.14	Pantr1	36.07	32.9	36.68	0.58	0.39	0	0
ENSMUSG00000080549.2	Gm22715	23.12	47.41	34.24	12.98	0	0	0
ENSMUSG00000077858.1	Gm25063	6.41	42.03	30.06	0	0	0	0
ENSMUSG00000083405.1	Gm15725	21.89	30.06	19.05	3.55	0	0	0
ENSMUSG00000095986.1	Gm23053	10.36	38.17	12.04	0	0	0	0
ENSMUSG00000048087.5	Gm4737	18.13	18.79	16.01	0	0	0	0
ENSMUSG00000042459.8	Bpifa2	15.89	17.54	16.86	0	0	0	0
ENSMUSG00000100309.1	Gm6644	18.17	18.23	12.73	0.17	0.04	0	0
ENSMUSG00000020583.4	Matn3	14.3	14.49	15.11	0.13	0.06	0	0
ENSMUSG00000074978.3	Actg-ps1	6.4	20.39	15.37	0.36	0	0	0
ENSMUSG00000074768.5	Bhmt	13.73	15.24	12.31	0.06	0.18	0	0
ENSMUSG00000030111.9	A2m	10.59	12.54	11.99	0.08	0.01	0	0
ENSMUSG00000080626.1	Mir1192	4.84	16.9	11.88	4.17	0	0	0
ENSMUSG00000107233.1	Gm42959	9.58	3.52	18.89	2.02	1.26	0	0
ENSMUSG00000091697.1	Eif3s6-ps2	7.12	12.06	11.43	0	0	0	0
ENSMUSG00000098428.6	Gm2260	13.09	7.01	9.7	0	2.47	0	0
ENSMUSG00000083679.1	Gm12892	6.17	10.49	7.07	0	0	0	0
ENSMUSG00000082838.1	Gm14519	3.1	16.18	4.36	0	0	0	0
ENSMUSG00000001023.10	S100a5	5.23	6.55	11.35	0	0.26	0	0
ENSMUSG00000085194.1	Platr32	6.78	5.95	9.39	0.07	0	0	0
ENSMUSG00000021908.9	Gm6768	6.18	9.29	6.37	0	0	0	0
ENSMUSG00000019232.14	Etnppl	6	6.97	6.36	0.26	0.36	0	0
ENSMUSG00000098235.1	Gm7497	7.16	6.83	5.23	0.42	0.3	0	0
ENSMUSG00000048949.8	Gm6206	5.19	7.42	5.35	1.05	0.4	0	0
ENSMUSG00000099397.1	Gm7809	4.84	5.38	7.52	0	0	0	0
ENSMUSG00000033036.9	Gm7879	5.74	7.41	4.43	0	0.31	0	0
ENSMUSG00000085077.1	1700049E15Rik	4.23	7.98	4.43	0.09	0	0	0
ENSMUSG00000091285.1	Gm17430	4.91	6.42	5.05	0.9	0	0	0
ENSMUSG00000085069.2	Gm13111	5.03	5.81	4.89	0.13	0.05	0	0
ENSMUSG00000092814.1	Gm23638	3092.95	3594.46	1657.54	0	56.77	857.81	80.03
ENSMUSG00000033196.17	Myh2	139.35	157.05	140.6	0.44	0.53	3.51	2.89
ENSMUSG00000100801.1	Gm15459	107.69	140.77	118.58	0.03	0	0	0.93
ENSMUSG00000026418.16	Tnni1	108.35	129.13	101.37	1.85	2.06	17.58	17.72
ENSMUSG00000005220.10	Corin	77.02	74.4	76.67	0.12	0.21	1.23	1.2
ENSMUSG00000093276.1	Gm26237	55.21	21.4	84.8	0	1.11	5.58	6.59
ENSMUSG00000029683.7	Lmod2	47.46	46.54	46.43	0.61	0.65	4.56	3.53
ENSMUSG00000033715.14	Akr1c14	29.89	29.41	32.86	0.71	0.65	4.93	4.67
ENSMUSG00000029306.8	Ibsp	30.94	28.47	30.77	0.02	0	0.07	0.04
ENSMUSG00000089995.1	Gm15716	34.3	14.29	35.33	0.13	0	4.4	1.44
ENSMUSG00000012187.13	Mogat1	20.92	24.11	15.25	0.15	0.1	1.04	2.05
ENSMUSG00000034990.14	Otoa	8.7	11.31	6.71	0.1	0.08	1.08	0.81
